# Supplementary material for: Age, Caste, and Social Context Shape Ovarian Morphology and Transcriptomic Profiles in Red Harvester Ants (Pogonomyrmex barbatus)
Source: Research Square preprint supplement (doi:10.21203/rs.3.rs-6933990/v1), 2025-06-27
Supplement: Supplementary file 1 [file 2783b77381a91b02b2311647.docx]

**Supplementary Figure 1**


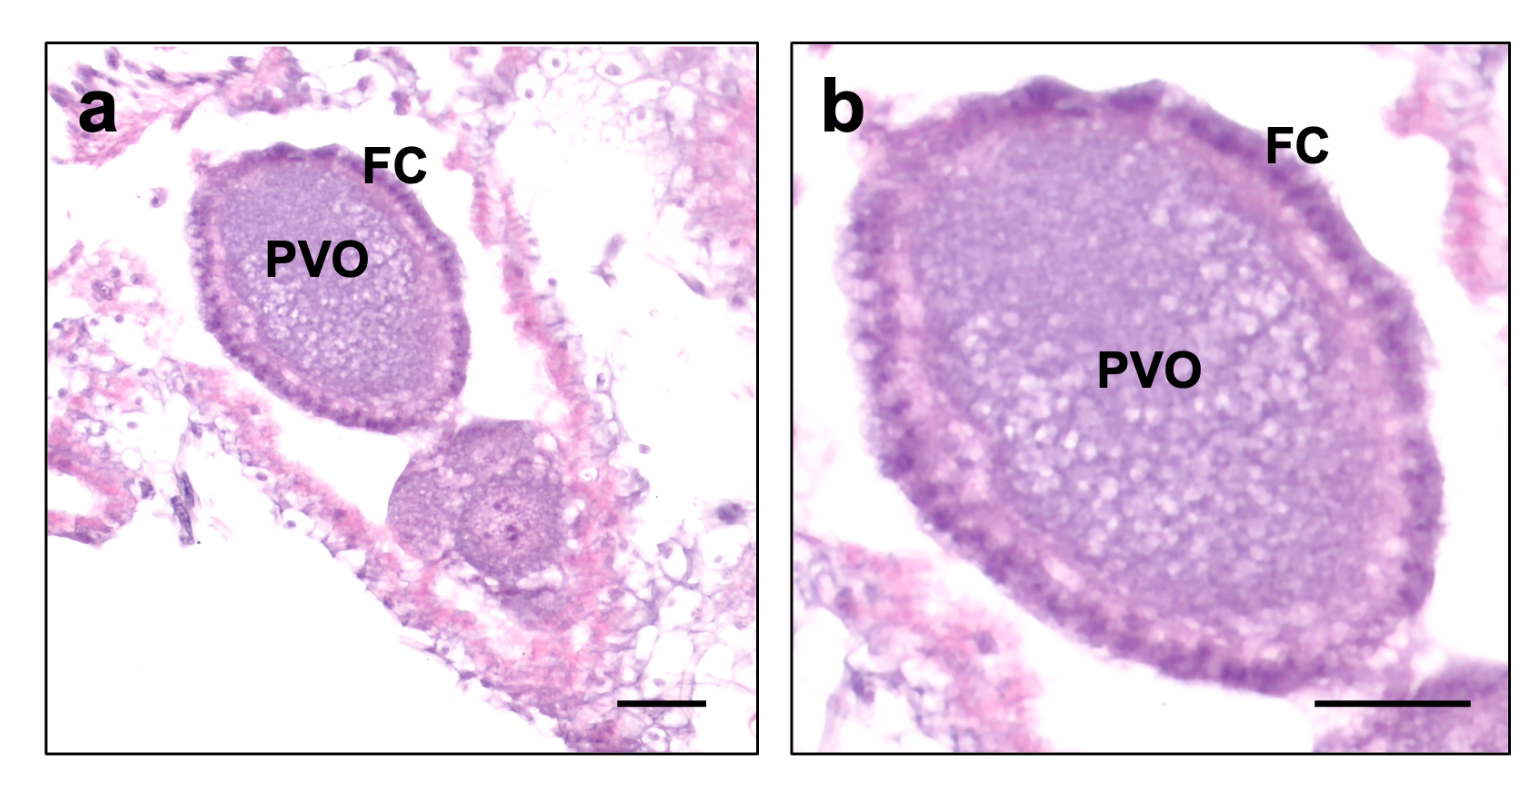


Fig. S1. Light micrograph of the previtellogenic oocyte of a *Pogonomyrmex barbatus* queen. No yolk granules were found. Intercellular spaces are not well delimited. (PVO) Previtellogenic oocyte, (FC) Follicular cells. Scale bars: 100µm.
