# Supplementary material for: Age, Caste, and Social Context Shape Ovarian Morphology and Transcriptomic Profiles in Red Harvester Ants (Pogonomyrmex barbatus)
Source: Research Square preprint supplement (doi:10.21203/rs.3.rs-6933990/v1), 2025-06-27
Supplement: Supplementary file 2 [file 575514ccf0fdae5b110fd328.xlsx]

## Sheet: QueenVSWorker
Gene	Base mean	log2(FC)	StdErr	Wald-Stats	P-value	P-adj	Chromosome	Start	End	Strand	Product
LOC105427982	21924.2	11.3225	0.955045	11.8554	2.01716e-32	1.34141e-30	NW_011933674.1	1194431	1196343	+	major royal jelly protein 1-like
LOC105427793	119.046	10.3505	1.07152	9.65968	4.47262e-22	1.39775e-20	NW_011933671.1	315419	318191	+	uncharacterized LOC105427793
LOC105432717	180.933	10.2309	1.07093	9.55335	1.25566e-21	3.79954e-20	NW_011933765.1	715874	717870	+	gephyrin-like
LOC105429181	166.314	10.1095	1.11003	9.10744	8.43452e-20	2.15805e-18	NW_011933699.1	156657	158560	+	leucine-rich repeat-containing protein 40-like, transcript variant X2
LOC105432557	12740.1	9.98906	0.67959	14.6987	6.57515e-49	1.05925e-46	NW_011933764.1	875553	878969	+	chymotrypsin-2-like, transcript variant X1
LOC105423722	78.4868	9.74653	1.05699	9.22102	2.94283e-20	7.9387e-19	NW_011933512.1	203795	204940	+	uncharacterized LOC105423722
LOC105429022	24752.3	9.70239	0.488412	19.8652	8.14878e-88	6.65755e-85	NW_011933696.1	163	2274	-	major royal jelly protein 1
LOC105430684	73.7143	9.65911	1.08696	8.88635	6.31493e-19	1.46512e-17	NW_011933720.1	194381	196188	+	mevalonate kinase-like
LOC105432758	67.5798	9.53223	1.12021	8.5093	1.74986e-17	3.44491e-16	NW_011933765.1	714442	715792	+	uncharacterized LOC105432758
LOC105430631	67.4419	9.5315	1.1292	8.44097	3.14724e-17	6.12213e-16	NW_011933720.1	224704	226485	+	mevalonate kinase-like, transcript variant X2
LOC105432171	110.43	9.51876	1.10959	8.57864	9.60041e-18	1.93327e-16	NW_011933759.1	42348	45552	-	uncharacterized LOC105432171, transcript variant X1
LOC105427322	66.7965	9.51674	1.10282	8.62949	6.1625e-18	1.27232e-16	NW_011933663.1	654261	656600	-	uncharacterized LOC105427322, transcript variant X2
LOC105430689	66.0104	9.50027	1.17173	8.1079	5.15008e-16	8.89858e-15	NW_011933720.1	221418	222578	+	mevalonate kinase-like
LOC105432258	63.125	9.43629	1.14119	8.26881	1.35298e-16	2.4564e-15	NW_011933761.1	293569	294754	+	mevalonate kinase-like
LOC105432196	60.1104	9.36653	1.11822	8.37628	5.46273e-17	1.04837e-15	NW_011933759.1	37395	39089	-	uncharacterized LOC105432196
LOC105430624	60.0251	9.36383	1.14559	8.17381	2.9879e-16	5.22942e-15	NW_011933720.1	187484	189090	+	mevalonate kinase-like
LOC105427981	4287.08	9.23063	0.630934	14.6301	1.80522e-48	2.79028e-46	NW_011933674.1	1184890	1193451	-	uncharacterized LOC105427981
LOC105432169	53.5008	9.19466	1.14067	8.06072	7.5845e-16	1.27952e-14	NW_011933759.1	18827	19617	-	uncharacterized LOC105432169
LOC105422723	42.5474	8.86572	1.09726	8.07987	6.48364e-16	1.10193e-14	NW_011931420.1	5545	11027	-	aminopeptidase N-like
LOC105430690	41.8277	8.84486	1.09512	8.07661	6.65933e-16	1.13011e-14	NW_011933720.1	230725	231298	+	uncharacterized LOC105430690
LOC105430691	41.1103	8.81698	1.19006	7.40884	1.27407e-13	1.64293e-12	NW_011933720.1	233266	234588	+	mevalonate kinase-like
LOC105426047	66.2559	8.7808	1.11212	7.89558	2.88966e-15	4.55889e-14	NW_011933616.1	13290	16824	+	uncharacterized LOC105426047
LOC105422459	39.8438	8.76301	1.0819	8.09968	5.51048e-16	9.4638e-15	NW_011931260.1	8810	9815	+	aminopeptidase M1-B-like
LOC105430625	39.4469	8.75817	1.15786	7.5641	3.90552e-14	5.38209e-13	NW_011933720.1	190977	192653	+	mevalonate kinase-like
LOC105434043	38.6374	8.72751	1.13233	7.70754	1.28268e-14	1.87853e-13	NW_011933341.1	421081	422977	+	uncharacterized LOC105434043
LOC105429044	201.721	8.64858	0.809369	10.6856	1.18898e-26	5.19066e-25	NW_011933697.1	411381	413833	-	mitochondrial enolase superfamily member 1-like
LOC105424082	57.2369	8.56825	1.12641	7.60667	2.81256e-14	3.93277e-13	NW_011932368.1	240	1759	+	uncharacterized LOC105424082
LOC105433329	34.4449	8.56092	1.1374	7.52676	5.20152e-14	7.07431e-13	NW_011933311.1	695257	697740	-	uncharacterized LOC105433329
LOC105430626	34.4013	8.56046	1.16197	7.36719	1.7426e-13	2.19784e-12	NW_011933720.1	202455	203144	+	uncharacterized LOC105430626
LOC105429856	33.9868	8.54135	1.1104	7.69217	1.4466e-14	2.09711e-13	NW_011933712.1	556591	557749	+	uncharacterized LOC105429856
LOC105432170	53.4184	8.46822	1.08878	7.7777	7.38546e-15	1.11151e-13	NW_011933759.1	23746	31023	-	uncharacterized LOC105432170
LOC105430686	31.554	8.4365	1.16303	7.25392	4.04884e-13	4.93717e-12	NW_011933720.1	201719	202463	+	mevalonate kinase-like
LOC105430630	50.0073	8.37679	1.10012	7.61441	2.64901e-14	3.71316e-13	NW_011933720.1	208853	210300	+	mevalonate kinase-like
LOC105430627	26.93	8.2088	1.23061	6.6705	2.5493e-11	2.49699e-10	NW_011933720.1	206181	207560	+	mevalonate kinase-like
LOC105426695	25.453	8.12564	1.15966	7.00693	2.43599e-12	2.69207e-11	NW_011933635.1	555993	556991	-	ester hydrolase C11orf54 homolog
LOC105422712	25.5498	8.1236	1.12235	7.238	4.55337e-13	5.52296e-12	NW_011931420.1	7	1890	-	endoplasmic reticulum aminopeptidase 1-like
LOC105426767	66.457	8.07249	1.08351	7.4503	9.31247e-14	1.22573e-12	NW_011933637.1	786547	789012	-	4-coumarate--CoA ligase-like 7
LOC105426794	97.3781	8.05405	0.932767	8.63457	5.89489e-18	1.2237e-16	NW_011933638.1	197456	198664	+	uncharacterized LOC105426794
LOC105430688	22.9516	7.98045	1.17244	6.80668	9.9878e-12	1.03292e-10	NW_011933720.1	213926	218047	+	mevalonate kinase-like
LOC105434253	60.684	7.93388	1.06729	7.43369	1.05613e-13	1.37742e-12	NW_011933351.1	16547	18315	-	zinc carboxypeptidase-like
LOC105432195	36.6756	7.92596	1.12186	7.065	1.60618e-12	1.81896e-11	NW_011933759.1	13936	15334	-	uncharacterized LOC105432195
LOC105429196	198.626	7.86177	0.628829	12.5022	7.25816e-36	5.80551e-34	NW_011933699.1	499389	501767	+	E3 ubiquitin-protein ligase MARCH1-like
LOC105433100	55.5899	7.8072	1.09951	7.10064	1.24181e-12	1.43909e-11	NW_011933768.1	269238	270941	+	mevalonate kinase-like
LOC105427774	20.3139	7.79985	1.3024	5.98884	2.11344e-09	1.60942e-08	NW_011933670.1	1159421	1160080	-	uncharacterized LOC105427774
LOC105430622	19.6088	7.75266	1.24445	6.22981	4.67e-10	3.89567e-09	NW_011933720.1	173991	174975	+	uncharacterized LOC105430622
LOC105434042	32.3632	7.74475	1.17165	6.61013	3.83992e-11	3.67847e-10	NW_011933341.1	419583	420956	+	uncharacterized LOC105434042
LOC105427326	18.9208	7.70099	1.16205	6.62708	3.42396e-11	3.31331e-10	NW_011933663.1	624063	650820	-	uncharacterized LOC105427326
LOC105430820	51.4676	7.68845	1.08426	7.09095	1.33198e-12	1.53426e-11	NW_011933723.1	216764	219383	+	proton-coupled folate transporter-like
LOC105427276	18.2391	7.64871	1.13868	6.71719	1.85265e-11	1.83787e-10	NW_011933656.1	127999	129901	+	aminopeptidase N-like
LOC105424900	98.238	7.64453	0.839579	9.1052	8.61107e-20	2.19362e-18	NW_011933577.1	1269649	1271995	+	uncharacterized LOC105424900
LOC105428154	48.8585	7.62098	1.08552	7.02056	2.20974e-12	2.46585e-11	NW_011929818.1	96879	98198	-	L-threonine dehydratase catabolic TdcB-like
LOC105430736	17.7511	7.60783	1.25976	6.03913	1.54951e-09	1.20158e-08	NW_011933722.1	259441	260175	-	uncharacterized LOC105430736
LOC105425798	469.261	7.55727	0.42426	17.8129	5.61734e-71	2.4712e-68	NW_011933607.1	1012724	1020093	-	insulin-degrading enzyme-like
LOC105432323	66.8036	7.51123	0.976959	7.68837	1.49018e-14	2.1521e-13	NW_011933761.1	1413816	1417386	-	aminopeptidase N-like
LOC105428242	45.0197	7.49758	1.08088	6.93654	4.01817e-12	4.31547e-11	NW_011933682.1	716894	719010	+	insulin-degrading enzyme-like
LOC105430724	84.9956	7.4345	0.829796	8.95942	3.26382e-19	7.82632e-18	NW_011933721.1	324704	331756	-	aminopeptidase N-like
LOC105423623	25.2263	7.38193	1.14084	6.47061	9.76051e-11	8.87446e-10	NW_011929660.1	2581	3587	-	aminopeptidase Q-like
LOC105427277	25.0296	7.37401	1.13555	6.49379	8.37023e-11	7.70223e-10	NW_011933656.1	130182	131837	+	aminopeptidase N-like
LOC105422569	24.2917	7.32754	1.13096	6.47902	9.23179e-11	8.42723e-10	NW_011931359.1	260	2342	-	aminopeptidase M1-like
LOC105426786	148.881	7.2424	0.603226	12.0061	3.29989e-33	2.32988e-31	NW_011933637.1	780078	782638	-	luciferin 4-monooxygenase-like
LOC105423408	22.6296	7.22953	1.10599	6.53672	6.28821e-11	5.88099e-10	NW_011933465.1	370062	388908	+	aminopeptidase N-like
LOC105434033	107.663	7.2009	0.753473	9.55695	1.21283e-21	3.67967e-20	NW_011933341.1	127872	129242	-	uncharacterized LOC105434033
LOC105432353	22.0413	7.18748	1.10097	6.52833	6.65063e-11	6.17451e-10	NW_011933763.1	488771	490264	-	uncharacterized LOC105432353
LOC105422892	751.665	7.14974	0.790683	9.04249	1.5315e-19	3.79984e-18	NW_011933420.1	2089834	2092408	+	esterase E4-like
LOC105428241	21.3316	7.14433	1.15157	6.204	5.50449e-10	4.53605e-09	NW_011933682.1	711977	713684	+	putative zinc protease mug138
LOC112552705	12.7268	7.1186	1.18933	5.98539	2.15867e-09	1.64059e-08	NW_011933682.1	715925	716484	+	insulin-degrading enzyme-like
LOC105423753	11.377	6.96994	1.32438	5.26281	1.41867e-07	8.22859e-07	NW_011933512.1	323860	324486	+	mevalonate kinase-like
LOC105426875	18.7677	6.95634	1.18739	5.85852	4.67014e-09	3.40453e-08	NW_011933643.1	414775	415721	+	uncharacterized LOC105426875
LOC105423755	165.769	6.91266	0.526575	13.1276	2.28851e-39	2.19966e-37	NW_011933512.1	374214	377826	-	uncharacterized LOC105423755
LOC105427427	17.6826	6.87374	1.22177	5.62603	1.84407e-08	1.2371e-07	NW_011933667.1	420164	424721	-	glutathione S-transferase-like, transcript variant X2
LOC105432716	314.129	6.86358	0.71387	9.61461	6.93696e-22	2.13293e-20	NW_011933765.1	709752	713198	+	gephyrin-like
LOC105427219	30430.5	6.85107	0.574809	11.9189	9.43876e-33	6.4647e-31	NW_011933653.1	1288682	1289767	-	uncharacterized LOC105427219
LOC105430903	41.0665	6.80466	0.963088	7.06546	1.6009e-12	1.81658e-11	NW_011933725.1	1546714	1549638	+	aminopeptidase N-like
LOC105423370	10.1354	6.79812	1.30378	5.21417	1.84646e-07	1.05074e-06	NW_011931839.1	628	2908	+	leucyl-cystinyl aminopeptidase-like
LOC105429025	41.2816	6.7774	1.00033	6.7752	1.24236e-11	1.26876e-10	NW_011933697.1	18824	39187	-	pancreatic triacylglycerol lipase-like
LOC105432117	16.5177	6.76781	1.12344	6.0242	1.69943e-09	1.31161e-08	NW_011929543.1	17	1342	+	aminopeptidase M1-C-like
LOC105426294	9.9478	6.76075	1.25318	5.39489	6.85669e-08	4.18723e-07	NW_011933623.1	353321	359219	-	cytochrome P450 4C1-like
LOC105427775	15.9611	6.723	1.17438	5.72471	1.03608e-08	7.2178e-08	NW_011933670.1	1162663	1163761	-	alanine/arginine aminopeptidase-like
LOC105426144	363.82	6.69228	0.659882	10.1416	3.61029e-24	1.31511e-22	NW_011933619.1	180435	189159	+	venom acid phosphatase Acph-1-like, transcript variant X2
LOC112552272	9.10807	6.64131	1.2056	5.50873	3.6143e-08	2.3121e-07	NW_011931412.1	1229	1782	-	aminopeptidase 2, mitochondrial-like
LOC105429855	168.532	6.634	0.560311	11.8399	2.42862e-32	1.59647e-30	NW_011933712.1	548036	553581	+	uncharacterized LOC105429855, transcript variant X3
LOC105428853	48.5856	6.59981	0.912911	7.22941	4.85101e-13	5.87774e-12	NW_011933695.1	1343808	1345187	+	mevalonate kinase-like
LOC105425852	83.9464	6.59884	0.64023	10.307	6.55182e-25	2.52322e-23	NW_011933611.1	569051	571930	-	queuosine salvage protein-like
LOC105430825	14.2133	6.55459	1.20667	5.43198	5.5733e-08	3.4514e-07	NW_011933723.1	596797	598448	+	uncharacterized LOC105430825
LOC105426296	613.711	6.54301	0.295368	22.1521	9.96321e-109	1.42449e-105	NW_011933623.1	333008	338723	-	aminopeptidase N-like, transcript variant X3
LOC105430692	21.9529	6.47316	1.15004	5.62864	1.81639e-08	1.21924e-07	NW_011933720.1	235414	236726	+	mevalonate kinase-like
LOC105430623	13.1222	6.43676	1.18051	5.45251	4.96628e-08	3.11365e-07	NW_011933720.1	180683	185429	+	mevalonate kinase-like, transcript variant X1
LOC105426610	7.57047	6.37664	1.31683	4.84242	1.28264e-06	6.42896e-06	NW_011929796.1	82	724	+	aminopeptidase M1-like
LOC105433987	53.654	6.37323	0.798502	7.98148	1.44595e-15	2.35931e-14	NW_011933339.1	512853	513275	+	uncharacterized LOC105433987
LOC105423970	62.3289	6.3678	0.716609	8.88602	6.33369e-19	1.46649e-17	NW_011933542.1	46023	49063	+	4-coumarate--CoA ligase-like 7
LOC105434254	219.958	6.342	0.420609	15.0781	2.25532e-51	3.96866e-49	NW_011933351.1	19465	23982	-	zinc carboxypeptidase A 1-like, transcript variant X1
LOC112552680	7.38196	6.33754	1.42452	4.4489	8.63106e-06	3.76658e-05	NW_011933670.1	1163710	1164966	-	leucyl-cystinyl aminopeptidase-like
LOC105426676	19.6824	6.31111	1.11312	5.66976	1.42997e-08	9.70685e-08	NW_011933635.1	642828	645003	+	leucine-rich repeat-containing protein 40-like, transcript variant X2
LOC105427500	7.18639	6.29318	1.24394	5.05905	4.21342e-07	2.29382e-06	NW_011933667.1	1762424	1765492	-	odorant receptor 13a-like
LOC105425398	7.15483	6.2904	1.26924	4.95602	7.19521e-07	3.76999e-06	NW_011933593.1	314322	320362	-	uncharacterized LOC105425398
LOC105433451	620.367	6.27889	0.269069	23.3356	1.92812e-120	3.67564e-117	NW_011933316.1	46325	48620	+	uncharacterized LOC105433451
LOC105425776	6.87494	6.24194	1.35505	4.60644	4.09623e-06	1.90072e-05	NW_011933607.1	1016957	1017677	-	insulin-degrading enzyme-like
LOC105430715	146.362	6.23784	0.911288	6.84507	7.64367e-12	7.99162e-11	NW_011933721.1	334176	350879	-	aminopeptidase N-like
LOC105431618	18.5677	6.22724	1.15822	5.37654	7.59289e-08	4.59754e-07	NW_011933746.1	17109	21319	+	probable tubulin polyglutamylase TTLL9
LOC105422452	6.64936	6.18837	1.68676	3.66878	0.000243708	0.000799408	NW_011931259.1	123	992	+	aminopeptidase Q-like
LOC105432046	1183.87	6.18036	0.439715	14.0554	7.14012e-45	8.59671e-43	NW_011933757.1	828283	833563	+	MATH and LRR domain-containing protein PFE0570w-like
LOC112552700	6.54822	6.16728	1.38235	4.46144	8.14116e-06	3.56503e-05	NW_011933681.1	895508	897146	-	leukotriene A-4 hydrolase-like
LOC105429198	35.3098	6.15455	0.868187	7.08897	1.35112e-12	1.55474e-11	NW_011933699.1	508528	509453	+	E3 ubiquitin-protein ligase MARCH3-like
LOC105429199	123.517	6.15437	0.496246	12.4019	2.55356e-35	1.98692e-33	NW_011933699.1	503513	515451	+	E3 ubiquitin-protein ligase MARCH3-like, transcript variant X2
LOC105428221	35.3769	6.14431	0.867614	7.08185	1.42239e-12	1.62207e-11	NW_011929818.1	100292	102173	-	threonine dehydratase, mitochondrial-like
LOC105434327	43.2446	6.12675	0.735373	8.33149	7.9833e-17	1.50681e-15	NW_011933354.1	541058	547090	+	putative fatty acyl-CoA reductase CG5065
LOC105423902	52.5038	6.11513	0.737087	8.29635	1.07361e-16	1.99675e-15	NW_011929682.1	1885	8706	+	aminopeptidase N-like
LOC105423067	60.3849	6.10074	0.664745	9.17756	4.40969e-20	1.15949e-18	NW_011931664.1	155	628	-	aminopeptidase M1-like
LOC105426298	134.097	6.08091	0.454116	13.3907	6.85574e-41	7.12873e-39	NW_011933623.1	415522	418929	-	endoplasmic reticulum aminopeptidase 1-like
LOC105430621	76.1342	6.06087	0.671101	9.03123	1.69748e-19	4.17543e-18	NW_011933720.1	166856	179085	+	mevalonate kinase-like, transcript variant X3
LOC105432757	497.753	6.04345	0.747916	8.08038	6.45641e-16	1.09894e-14	NW_011933765.1	705363	708581	+	gephyrin-like
LOC105429197	23.8877	6.01834	1.01363	5.93743	2.8953e-09	2.17299e-08	NW_011933699.1	517520	519944	+	E3 ubiquitin-protein ligase MARCH3-like
LOC105423208	5.89503	6.00759	1.29326	4.6453	3.39586e-06	1.60106e-05	NW_011931735.1	219	1055	+	aminopeptidase M1-B-like
LOC105423719	23.2619	5.95522	0.976565	6.09812	1.0732e-09	8.5009e-09	NW_011932065.1	225	1012	-	uncharacterized LOC105423719
LOC105430593	46.9334	5.94325	0.689373	8.62124	6.62318e-18	1.36007e-16	NW_011933719.1	200249	202665	+	luciferin 4-monooxygenase-like
LOC105428557	5.5344	5.93193	1.30837	4.53383	5.79241e-06	2.60841e-05	NW_011933687.1	890320	892116	+	odorant receptor Or2-like
LOC112552586	15.2003	5.90319	1.20884	4.88334	1.04305e-06	5.30949e-06	NW_011933637.1	789005	789672	-	luciferin 4-monooxygenase-like
LOC105426297	323.999	5.83383	0.811977	7.18472	6.73445e-13	8.04896e-12	NW_011933623.1	411397	415515	-	aminopeptidase N-like
LOC105422812	221.898	5.79157	0.366898	15.7853	3.93084e-56	8.64634e-54	NW_011933420.1	229267	234984	-	aminopeptidase Q-like
LOC112552373	82.9655	5.78127	0.526333	10.984	4.5603e-28	2.24831e-26	NW_011933514.1	344944	346484	+	uncharacterized LOC112552373
LOC112552291	4.99941	5.78069	1.45635	3.96929	7.20867e-05	0.000261188	NW_011931592.1	9	1196	+	aminopeptidase N-like
LOC105422563	13.7458	5.77258	1.17244	4.92357	8.49795e-07	4.39022e-06	NW_011933404.1	337144	338140	+	uncharacterized LOC105422563
LOC105427238	523.379	5.68847	0.314975	18.0601	6.57119e-73	3.26788e-70	NW_011933653.1	38558	46329	-	insulin-degrading enzyme-like
LOC105422260	7.61354	5.63694	1.27532	4.42003	9.86856e-06	4.23711e-05	NW_011931202.1	700	1371	+	aminopeptidase N-like
LOC105430215	374.681	5.63497	0.642504	8.77033	1.78136e-18	3.91831e-17	NW_011933717.1	1224173	1226317	+	ubiquinone biosynthesis O-methyltransferase, mitochondrial-like, transcript variant X2
LOC112552960	4.38067	5.5931	1.57745	3.54565	0.000391642	0.00123269	NW_011933757.1	1479753	1480734	-	uncharacterized LOC112552960
LOC105424408	7.35935	5.58038	1.34855	4.13807	3.50242e-05	0.00013493	NW_011933563.1	600135	600837	+	uncharacterized LOC105424408
LOC105422614	11.9411	5.56234	1.10229	5.04618	4.50729e-07	2.43411e-06	NW_011931383.1	6821	8164	-	aminopeptidase M1-like, transcript variant X1
LOC112552919	47.6842	5.54197	0.704732	7.86394	3.7225e-15	5.81666e-14	NW_011933734.1	337452	339775	+	aminopeptidase 1-like
LOC105423995	6.77015	5.46671	1.28158	4.26561	1.99359e-05	8.05465e-05	NW_011933543.1	345039	345699	+	ester hydrolase C11orf54 homolog
LOC105424838	16.6595	5.45229	1.04412	5.22189	1.77106e-07	1.01186e-06	NW_011933577.1	626712	629520	+	zinc finger protein 239-like
LOC105422866	731.217	5.43228	0.175951	30.8738	2.68225e-209	1.53398e-205	NW_011933420.1	1277384	1297299	-	glutamate decarboxylase, transcript variant X2
LOC112552781	6.5871	5.42996	1.29482	4.19361	2.74549e-05	0.000108137	NW_011933699.1	35803	36638	+	uncharacterized LOC112552781
LOC105428273	6.51875	5.40917	1.31	4.12913	3.6414e-05	0.000139907	NW_011933683.1	678071	703260	+	cytochrome P450 4C1-like
LOC105422282	3.86475	5.39495	1.43058	3.77117	0.000162483	0.000548547	NW_011929595.1	441	842	+	aminopeptidase M1-like
LOC105422850	3.77388	5.37817	1.57218	3.42083	0.00062431	0.00189162	NW_011931515.1	63	1017	-	uncharacterized LOC105422850
LOC105433988	37.1947	5.35828	0.665363	8.05317	8.06778e-16	1.35705e-14	NW_011933339.1	520482	520850	+	uncharacterized LOC105433988
LOC105430784	37.1981	5.32643	0.789473	6.74682	1.51125e-11	1.51895e-10	NW_011933723.1	591438	596060	+	aminopeptidase N-like
LOC105429020	9.65161	5.22915	1.2009	4.35436	1.33457e-05	5.59764e-05	NW_011933696.1	1342496	1344519	+	uncharacterized LOC105429020
LOC105422612	5.69442	5.22226	1.31607	3.96808	7.24546e-05	0.000262341	NW_011933406.1	692402	696884	-	kinesin-like protein KIF20B
LOC105428672	5.68301	5.21837	1.27021	4.10827	3.98629e-05	0.000152136	NW_011933693.1	1218555	1221692	-	uncharacterized LOC105428672
LOC105424757	3.35363	5.21722	1.61482	3.23084	0.00123428	0.00352855	NW_011933575.1	945242	954415	-	cytochrome P450 4C1-like
LOC105422228	222.636	5.19217	0.358596	14.4792	1.64053e-47	2.46899e-45	NW_011933373.1	260006	264851	+	uncharacterized LOC105422228
LOC105426862	60.2323	5.13568	0.66621	7.70881	1.26999e-14	1.86232e-13	NW_011933643.1	55	2052	-	uncharacterized LOC105426862
LOC105431082	121.326	5.12717	0.442555	11.5854	4.88684e-31	2.98908e-29	NW_011933728.1	538532	541678	+	homeobox protein H2.0-like, transcript variant X2
LOC105423226	212.264	5.11688	0.727993	7.02875	2.08398e-12	2.33921e-11	NW_011933455.1	597772	602195	-	circadian clock-controlled protein-like
LOC105426806	8.84176	5.09799	1.26778	4.0212	5.79013e-05	0.000213982	NW_011933638.1	324926	328963	-	facilitated trehalose transporter Tret1-like
LOC105423774	244.323	5.07165	0.41389	12.2536	1.60655e-34	1.19323e-32	NW_011933514.1	337724	339611	+	uncharacterized LOC105423774
LOC105430723	92.4889	5.06156	0.43951	11.5164	1.09119e-30	6.40051e-29	NW_011933721.1	307404	322216	-	aminopeptidase M1-A-like
LOC105432556	8.64732	5.0544	1.34006	3.77178	0.000162087	0.000547534	NW_011933764.1	882973	885551	+	chymotrypsin-2-like
LOC105430431	84.7757	5.01659	0.508792	9.85981	6.21682e-23	2.09141e-21	NW_011933718.1	1266986	1270582	-	putative ATP-dependent RNA helicase DHX57
LOC105428977	55.4636	4.9851	0.596472	8.35765	6.39805e-17	1.22172e-15	NW_011933695.1	1352369	1358206	+	mevalonate kinase-like
LOC105432416	190.792	4.98101	0.74442	6.69113	2.2145e-11	2.18169e-10	NW_011933763.1	1377281	1378364	-	uncharacterized LOC105432416
LOC105428850	11.5273	4.96374	1.03986	4.77348	1.81069e-06	8.87347e-06	NW_011933695.1	1356753	1357841	+	mevalonate kinase-like
LOC105426405	11.7294	4.94762	1.02767	4.81443	1.47622e-06	7.30318e-06	NW_011933624.1	786293	789303	-	uncharacterized LOC105426405
LOC105426863	73.119	4.94616	0.532504	9.28849	1.56495e-20	4.30287e-19	NW_011933643.1	2501	6325	-	uncharacterized LOC105426863, transcript variant X1
LOC105424585	54.933	4.94193	0.648228	7.62376	2.46389e-14	3.46641e-13	NW_011933571.1	610464	611583	+	15-hydroxyprostaglandin dehydrogenase [NAD(+)]-like
LOC105428215	2.75187	4.92639	1.65446	2.97764	0.0029048	0.00747639	NW_011933681.1	896783	898001	-	leukotriene A-4 hydrolase-like
LOC112552797	2.75039	4.91791	1.72541	2.85028	0.00436804	0.0106801	NW_011933704.1	878369	879461	-	uncharacterized LOC112552797
LOC105428951	2.71522	4.9015	1.50778	3.25082	0.00115074	0.00331541	NW_011929849.1	6653	7954	+	uncharacterized LOC105428951
LOC105424020	1037.06	4.89551	0.27332	17.9113	9.62842e-72	4.40519e-69	NW_011933543.1	601735	609626	-	UDP-glucuronosyltransferase 2C1
LOC105424255	37.3781	4.89138	0.638715	7.65816	1.88609e-14	2.69328e-13	NW_011933557.1	594389	603108	-	endochitinase, transcript variant X1
LOC105432821	2.62354	4.85526	1.97739	2.45539	0.0140731	0.0300089	NW_011933766.1	567810	569532	-	uncharacterized LOC105432821
LOC105433209	2.64374	4.84677	1.50949	3.21087	0.00132335	0.00375407	NW_011933854.1	6	838	+	uncharacterized LOC105433209
LOC105430452	7.39291	4.83907	1.20659	4.01053	6.05814e-05	0.000222664	NW_011929911.1	1099	1611	-	uncharacterized LOC105430452
LOC105424506	60.7783	4.83713	0.542053	8.92372	4.50899e-19	1.06119e-17	NW_011932946.1	338	971	+	insulin-degrading enzyme-like
LOC112552658	4.25749	4.79366	1.38587	3.45894	0.000542299	0.00166832	NW_011933667.1	1753195	1755001	-	uncharacterized LOC112552658
LOC105422126	2.54963	4.7899	1.97984	2.41933	0.015549	0.0328256	NW_011929583.1	265	1233	-	alanine/arginine aminopeptidase-like
LOC105433545	1663.32	4.76951	0.472417	10.096	5.75597e-24	2.07034e-22	NW_011933322.1	262691	269138	+	protein PFC0760c-like
LOC105422685	199.139	4.76609	0.316816	15.0437	3.7957e-51	6.57806e-49	NW_011931413.1	194	1599	-	uncharacterized LOC105422685
LOC105422911	2.44492	4.72029	1.59663	2.9564	0.0031125	0.00793951	NW_011933420.1	2264275	2264795	-	uncharacterized LOC105422911
LOC105433989	285.442	4.68984	0.584014	8.03035	9.71917e-16	1.62289e-14	NW_011933339.1	513445	516759	+	gephyrin-like
LOC105423075	1017.89	4.6826	0.520204	9.00147	2.22719e-19	5.45114e-18	NW_011933434.1	93112	102240	-	insulin-degrading enzyme-like
LOC105423371	264.314	4.66261	0.364538	12.7904	1.85426e-37	1.61901e-35	NW_011933463.1	307136	308495	+	uncharacterized LOC105423371
LOC105423510	2.26627	4.6483	1.61687	2.87487	0.00404199	0.009966	NW_011933487.1	34418	36384	+	odorant receptor 4-like
LOC105423562	68305.5	4.63496	0.522922	8.86356	7.74978e-19	1.77284e-17	NW_011933501.1	73138	76571	-	uncharacterized serine-rich protein C215.13-like
LOC105432044	188.334	4.60487	0.453768	10.1481	3.37942e-24	1.23494e-22	NW_011933757.1	760169	764842	+	L-threonine 3-dehydrogenase, mitochondrial
LOC105425788	93.8423	4.6013	0.502492	9.15697	5.33742e-20	1.39382e-18	NW_011933607.1	1561694	1564019	-	uncharacterized LOC105425788
LOC105426864	23.9578	4.59224	0.727783	6.30991	2.79205e-10	2.40297e-09	NW_011933643.1	13282	16075	-	uncharacterized LOC105426864, transcript variant X1
LOC105424280	2.15058	4.57023	1.74035	2.62604	0.00863851	0.0194604	NW_011933557.1	729796	734415	+	probable citrate synthase 2, mitochondrial
LOC105433102	23.9348	4.55319	0.743391	6.12489	9.07466e-10	7.26353e-09	NW_011933768.1	276486	277476	+	uncharacterized LOC105433102
LOC105425271	336.605	4.537	0.21714	20.8943	6.02935e-97	5.74697e-94	NW_011933590.1	1422055	1432460	+	uncharacterized LOC105425271
LOC105423217	15.0568	4.51832	0.903812	4.99918	5.75748e-07	3.05587e-06	NW_011933455.1	535559	544610	-	uncharacterized LOC105423217, transcript variant X2
LOC105432320	3.51389	4.51234	1.57666	2.86196	0.00421023	0.010334	NW_011933761.1	274587	281086	-	major facilitator superfamily domain-containing protein 6-like
LOC105425178	217.773	4.4953	0.29003	15.4994	3.49976e-54	7.14826e-52	NW_011933210.1	15006	17385	+	histone demethylase UTY-like
LOC105431282	118.755	4.48863	0.408562	10.9864	4.44318e-28	2.20005e-26	NW_011933734.1	341799	344072	+	aminopeptidase N-like
LOC105422490	25.4885	4.41585	0.745436	5.92385	3.14492e-09	2.34802e-08	NW_011933404.1	289788	291931	-	heat shock protein 83-like
LOC105429852	44.9676	4.40954	0.594275	7.42003	1.17091e-13	1.51846e-12	NW_011933712.1	539835	546109	+	uncharacterized LOC105429852
LOC105424677	84.7851	4.40145	0.473326	9.29897	1.41808e-20	3.91788e-19	NW_011933574.1	180258	182006	+	rac GTPase-activating protein 1-like
LOC105431591	131.2	4.37284	0.447811	9.76493	1.59217e-22	5.20321e-21	NW_011933745.1	812107	815345	-	venom acid phosphatase Acph-1-like, transcript variant X1
LOC105431894	74.5599	4.32512	0.526862	8.2092	2.22668e-16	3.96094e-15	NW_011933754.1	74007	76454	+	mevalonate kinase-like
LOC105422936	1.81189	4.31425	1.73022	2.49346	0.0126503	0.0273473	NW_011933420.1	1265780	1267665	-	coiled-coil domain-containing protein 113
LOC105428558	1.78247	4.30374	1.85011	2.32621	0.0200076	0.0409825	NW_011933687.1	907433	909903	+	uncharacterized LOC105428558
LOC112552328	1.79644	4.30333	1.68263	2.5575	0.0105427	0.023248	NW_011933455.1	846353	848899	+	voltage-dependent anion-selective channel protein 2-like, transcript variant X2
LOC105433790	3.0466	4.29248	1.5394	2.78841	0.00529677	0.0126428	NW_011933333.1	92399	94621	-	uncharacterized LOC105433790
LOC105422336	3.04173	4.27186	1.56928	2.72219	0.00648513	0.0151598	NW_011933378.1	623373	630309	-	uncharacterized LOC105422336
LOC105424215	233.409	4.26946	0.713137	5.98687	2.13922e-09	1.62797e-08	NW_011932503.1	89	1284	-	insulin-degrading enzyme-like
LOC105427688	4.80291	4.22405	1.27236	3.31985	0.00090065	0.00265506	NW_011933669.1	1229092	1231359	-	sodium channel protein Nach-like
LOC105428055	9.89676	4.19283	1.13177	3.70466	0.000211674	0.00070285	NW_011933677.1	166589	172364	+	cytochrome P450 4C1-like
LOC105422467	70.7465	4.173	0.485148	8.6015	7.86822e-18	1.60422e-16	NW_011933402.1	115371	116187	-	uncharacterized LOC105422467
LOC105429023	14.1132	4.17231	0.860739	4.84736	1.25114e-06	6.27929e-06	NW_011933696.1	564762	565799	+	uncharacterized LOC105429023
LOC105426293	2.7813	4.15569	1.76214	2.35833	0.0183575	0.0380111	NW_011933623.1	371288	376892	-	cytochrome P450 4C1-like
LOC105431344	627.854	4.13524	0.216134	19.1328	1.34726e-81	8.11052e-79	NW_011933738.1	197620	208716	+	E3 ubiquitin-protein ligase TRIM71
LOC105423076	2.74868	4.13057	1.48935	2.77341	0.00554729	0.0131885	NW_011933434.1	236589	242209	+	uncharacterized LOC105423076
LOC105430356	527.975	4.1098	0.200137	20.535	1.0489e-93	9.22868e-91	NW_011933718.1	622408	628407	-	cyclin-dependent kinase-like 4, transcript variant X1
LOC105431257	8.89252	4.10796	1.01903	4.03124	5.54825e-05	0.000205975	NW_011933734.1	525836	529136	-	uncharacterized LOC105431257
LOC105429821	22.3744	4.10459	0.741884	5.53265	3.15422e-08	2.036e-07	NW_011933711.1	305929	314816	+	2-oxoglutarate dehydrogenase, mitochondrial-like
LOC105426059	2546.04	4.08966	0.357245	11.4478	2.41197e-30	1.39334e-28	NW_011933616.1	365919	368120	+	ejaculatory bulb-specific protein 3
LOC105428286	1656.37	4.08366	0.472686	8.63925	5.65819e-18	1.18099e-16	NW_011933684.1	196306	200106	-	insulin-like growth factor II-B
LOC112553048	73.6662	4.08239	0.433391	9.41965	4.52574e-21	1.30392e-19	NW_011933315.1	86120	87684	-	uncharacterized LOC112553048
LOC105433948	41.2893	4.07769	0.553495	7.36717	1.74282e-13	2.19784e-12	NW_011933338.1	87295	90587	+	leukotriene A-4 hydrolase-like
LOC105434285	102.973	4.06949	0.455497	8.93419	4.1018e-19	9.67348e-18	NW_011933353.1	138431	140533	-	juvenile hormone acid O-methyltransferase-like, transcript variant X2
LOC105424019	10.8285	4.06674	0.945606	4.30067	1.70282e-05	6.98097e-05	NW_011933543.1	618754	628042	-	rhodopsin-like
LOC105423272	13.0882	4.04625	0.875793	4.62011	3.83544e-06	1.79074e-05	NW_011933457.1	10967	11742	+	uncharacterized LOC105423272
LOC112552732	2.59223	4.04313	1.53318	2.63709	0.00836214	0.0189174	NW_011929820.1	620	2112	+	odorant receptor 43a-like
LOC105434010	19.876	4.04091	0.721815	5.59827	2.16506e-08	1.43642e-07	NW_011933340.1	1839	6781	+	transcription factor Sox-21-like
LOC105426304	1375.35	4.03628	0.242824	16.6222	4.81071e-62	1.52847e-59	NW_011933623.1	401831	407362	-	aminopeptidase N-like
LOC105432893	4169.05	4.02304	0.124224	32.3853	4.41993e-230	5.05551e-226	NW_011933766.1	1513416	1519969	+	probable cytochrome P450 305a1, transcript variant X1
LOC105422867	115.385	4.01966	0.318963	12.6023	2.0514e-36	1.7127e-34	NW_011931545.1	29808	32744	-	uncharacterized LOC105422867
LOC105433094	109.56	4.01276	0.378363	10.6056	2.80744e-26	1.18493e-24	NW_011933768.1	127280	133882	+	uncharacterized LOC105433094
LOC105427503	2.48161	3.97371	1.5174	2.61877	0.00882474	0.0198072	NW_011933667.1	1799854	1800835	+	odorant receptor Or2-like
LOC105426666	47.2992	3.96881	0.49267	8.05573	7.90034e-16	1.33084e-14	NW_011933635.1	560237	561982	-	ester hydrolase C11orf54 homolog
LOC105434342	220.137	3.91468	0.351918	11.1238	9.60477e-29	4.99361e-27	NW_011933354.1	623729	627467	-	uncharacterized LOC105434342
LOC105426090	1047.05	3.91404	0.238368	16.4202	1.37183e-60	3.64908e-58	NW_011933616.1	906108	908895	-	uncharacterized LOC105426090, transcript variant X2
LOC105430001	9.61378	3.90666	1.0515	3.71531	0.000202956	0.000675811	NW_011933716.1	33689	36765	+	major facilitator superfamily domain-containing protein 6-like
LOC105434008	266.289	3.8971	0.343147	11.3569	6.85092e-30	3.84122e-28	NW_011933339.1	521295	524265	+	gephyrin-like
LOC105422544	46.399	3.88569	0.458103	8.48213	2.21109e-17	4.33056e-16	NW_011931346.1	146	1571	+	uncharacterized LOC105422544
LOC105429490	5.54861	3.88467	1.22062	3.18254	0.00145987	0.00408533	NW_011933704.1	879490	883052	-	odorant receptor Or2-like
LOC105425965	117.007	3.8711	0.354129	10.9313	8.16269e-28	3.90648e-26	NW_011933614.1	355772	357391	-	uncharacterized LOC105425965
LOC105426339	1812.08	3.85475	0.271024	14.2229	6.60407e-46	8.68245e-44	NW_011933624.1	548847	559456	+	sialin
Trnas-gga_6	2.22834	3.8355	1.61379	2.37669	0.0174686	0.0363348	NW_011933708.1	220798	220870	+	tRNA-Ser
LOC105427757	59.848	3.82835	0.494502	7.74184	9.79887e-15	1.44993e-13	NW_011933245.1	10105	11730	-	transcription factor Adf-1-like, transcript variant X2
LOC105434215	5.34152	3.82394	1.29634	2.94979	0.00317989	0.00807539	NW_011933351.1	7982	11196	-	zinc carboxypeptidase-like
LOC112552633	32.5787	3.75658	0.491481	7.6434	2.11561e-14	3.00974e-13	NW_011933238.1	119141	120824	-	uncharacterized LOC112552633
LOC105433544	6209.74	3.75462	0.427674	8.77916	1.64703e-18	3.63682e-17	NW_011933322.1	251618	259916	+	MATH and LRR domain-containing protein PFE0570w-like
LOC112552292	27.8958	3.73671	0.531856	7.02578	2.12878e-12	2.38016e-11	NW_011933420.1	238240	243559	-	uncharacterized LOC112552292
LOC105427796	41.9735	3.721	0.471136	7.89793	2.83569e-15	4.49232e-14	NW_011933671.1	331598	333086	-	uncharacterized LOC105427796, transcript variant X1
LOC105424055	42.5194	3.70641	0.761825	4.86518	1.14354e-06	5.7824e-06	NW_011932343.1	823	2880	+	cytochrome P450 4C1-like
LOC105422442	24.0832	3.70112	0.764448	4.84155	1.28829e-06	6.44878e-06	NW_011933392.1	860110	864268	-	protein odd-skipped
LOC105423420	25.2811	3.68162	0.585786	6.28492	3.28015e-10	2.79363e-09	NW_011933467.1	158575	163618	+	endocuticle structural glycoprotein ABD-4-like
LOC105423890	3.25818	3.66057	1.51861	2.41047	0.0159318	0.0335286	NW_011933534.1	600281	602657	+	myosin-10-like
LOC112552659	2.04579	3.65432	1.62481	2.24907	0.0245078	0.0491102	NW_011933667.1	1795369	1797468	+	odorant receptor 49b-like
LOC105427265	398.706	3.63002	0.277715	13.071	4.81986e-39	4.59413e-37	NW_011933656.1	117069	123920	+	glutamyl aminopeptidase-like
LOC105423354	729.997	3.62231	0.437522	8.27916	1.24049e-16	2.27383e-15	NW_011933463.1	200386	202496	-	uncharacterized LOC105423354
LOC105422868	9605.45	3.61115	0.364417	9.90941	3.78875e-23	1.28975e-21	NW_011933420.1	1302073	1303666	+	uncharacterized LOC105422868
LOC105423942	3.18528	3.59846	1.53203	2.34882	0.0188331	0.0387991	NW_011933538.1	3107	6295	-	protein glass-like
LOC105427720	29.7194	3.58958	0.556755	6.44731	1.13849e-10	1.0286e-09	NW_011933670.1	261653	289574	+	uncharacterized LOC105427720
LOC105432010	6.76499	3.56428	1.17174	3.04186	0.0023512	0.00621517	NW_011933757.1	1488038	1488584	-	adenylate kinase 7-like
LOC112552880	42.2928	3.56166	0.479462	7.42845	1.09882e-13	1.42858e-12	NW_011933720.1	163125	164878	+	mevalonate kinase-like
LOC105426908	2858.11	3.56078	0.234534	15.1824	4.62847e-52	8.65973e-50	NW_011933646.1	104367	106712	+	juvenile hormone epoxide hydrolase 1-like
LOC105427547	53.2365	3.55977	0.444046	8.01667	1.08653e-15	1.81033e-14	NW_011933668.1	539086	541646	-	general odorant-binding protein 69a-like
LOC105433442	76.811	3.54924	0.411922	8.61628	6.91672e-18	1.4178e-16	NW_011933315.1	110834	113351	-	uncharacterized LOC105433442
LOC105425395	106615	3.54111	0.811456	4.3639	1.27766e-05	5.38064e-05	NW_011933593.1	42176	62670	-	vitellogenin-2-like
LOC105428852	61.8198	3.5392	0.546599	6.47495	9.4844e-11	8.65092e-10	NW_011933695.1	1349281	1351134	+	mevalonate kinase-like, transcript variant X2
LOC105432120	10.448	3.52595	0.992328	3.55321	0.000380558	0.00120111	NW_011933303.1	660271	662308	-	odorant receptor 63a-like
LOC105428632	5.78457	3.51379	1.15998	3.02917	0.00245226	0.00645101	NW_011933693.1	416703	422026	+	retinol dehydrogenase 11-like
LOC105423664	206.672	3.49436	0.280093	12.4757	1.01301e-35	7.99088e-34	NW_011933507.1	675585	680239	+	uncharacterized LOC105423664
LOC105425373	4.5171	3.49074	1.16281	3.00198	0.00268232	0.00697122	NW_011933210.1	231362	234041	-	lipase member H-A-like
LOC105428673	8.95167	3.48978	0.823462	4.23794	2.25581e-05	9.04065e-05	NW_011933693.1	1223899	1234626	-	general transcriptional corepressor CYC8
LOC105428282	13.3972	3.4871	0.713521	4.88718	1.02293e-06	5.21402e-06	NW_011933684.1	162361	167671	-	LIM domain-containing protein A-like
LOC105422269	9.17742	3.47164	0.933644	3.71838	0.000200506	0.00066843	NW_011933377.1	1167977	1170586	+	uncharacterized LOC105422269
LOC105429045	525.288	3.46885	0.577113	6.0107	1.84726e-09	1.41805e-08	NW_011933697.1	418248	420482	-	mitochondrial enolase superfamily member 1-like
LOC105428434	53.7532	3.44758	0.502535	6.86036	6.86856e-12	7.23465e-11	NW_011933686.1	1214053	1222927	-	uncharacterized LOC105428434
LOC105434314	14.3975	3.44523	0.64938	5.30542	1.12412e-07	6.62428e-07	NW_011933354.1	112532	114741	+	uncharacterized LOC105434314
LOC105430575	7.01466	3.43421	0.989164	3.47183	0.000516915	0.00159495	NW_011933719.1	52077	105648	-	somatostatin receptor type 2-like
LOC105433339	167.108	3.40407	0.338665	10.0514	9.05336e-24	3.19606e-22	NW_011933311.1	731112	734049	+	uncharacterized LOC105433339
LOC105426853	107.931	3.40217	0.375722	9.055	1.36565e-19	3.4255e-18	NW_011933232.1	22963	51854	-	protein cortex-like
LOC105422287	2446.04	3.39836	0.131565	25.8302	4.06247e-147	9.2933e-144	NW_011933378.1	115437	126483	+	uncharacterized LOC105422287, transcript variant X1
LOC105433452	84.3542	3.38578	0.410838	8.24114	1.70576e-16	3.05806e-15	NW_011933316.1	34789	47358	-	T-box protein 2-like
LOC105427021	22.3605	3.38246	0.628254	5.3839	7.28894e-08	4.43644e-07	NW_011933649.1	361133	365525	-	lipase 3-like
LOC105422876	43.1697	3.36076	0.448966	7.48556	7.12438e-14	9.48645e-13	NW_011933420.1	1527500	1536624	-	homeobox protein ceh-19-like
LOC105423472	885.854	3.33931	0.418789	7.97374	1.53948e-15	2.50477e-14	NW_011933478.1	27869	29083	+	uncharacterized LOC105423472
LOC105426796	456.936	3.33832	0.251273	13.2856	2.8042e-40	2.81354e-38	NW_011933638.1	202718	205203	+	uncharacterized LOC105426796, transcript variant X1
LOC105425857	72.6082	3.33087	0.569955	5.8441	5.09319e-09	3.69409e-08	NW_011933611.1	572311	579082	-	queuosine salvage protein-like
LOC105421966	81.0348	3.31665	0.506668	6.546	5.90975e-11	5.55886e-10	NW_011933354.1	772022	781663	-	uncharacterized LOC105421966
LOC105424254	3.87181	3.31473	1.20087	2.76028	0.00577523	0.0136623	NW_011933557.1	560463	565249	+	protein krueppel-like
LOC105432273	4.16434	3.30901	1.27518	2.59493	0.00946095	0.0210698	NW_011933303.1	1059640	1071470	+	uncharacterized LOC105432273
LOC105434334	975.882	3.30434	0.466179	7.08813	1.35932e-12	1.56227e-11	NW_011933354.1	588304	592380	-	lipase 3-like, transcript variant X3
LOC105426795	487.757	3.3014	0.167471	19.7133	1.65883e-86	1.18586e-83	NW_011933638.1	199675	201108	+	uncharacterized LOC105426795
LOC112552352	2.713	3.29265	1.39559	2.35932	0.0183084	0.0379231	NW_011933478.1	13013	14680	-	arginine kinase
LOC105424723	5.36155	3.28505	1.1006	2.98479	0.00283777	0.00732035	NW_011933575.1	487280	489984	+	glutamate receptor ionotropic, kainate 4-like
LOC105432486	408.09	3.28048	0.277326	11.8289	2.76637e-32	1.8081e-30	NW_011933763.1	2896176	2898910	+	insulin-like growth factor-binding protein-related protein 1
LOC105427797	57.2784	3.27553	0.416576	7.86298	3.7509e-15	5.85305e-14	NW_011933671.1	330146	331504	-	uncharacterized LOC105427797
LOC105424477	27.8124	3.25245	0.715673	4.5446	5.50384e-06	2.49417e-05	NW_011933568.1	411901	412403	+	uncharacterized LOC105424477
LOC105426652	8.82439	3.25082	0.981678	3.31149	0.000927995	0.00272654	NW_011933635.1	496998	497908	+	zinc finger protein 18-like
LOC105423353	359.221	3.2499	0.367638	8.83995	9.57635e-19	2.169e-17	NW_011933463.1	195461	196771	-	uncharacterized LOC105423353
LOC105428555	29.4065	3.24659	0.597272	5.4357	5.45831e-08	3.38753e-07	NW_011933255.1	154536	158385	+	putative threonine dehydratase
LOC105427233	22.0736	3.23912	0.619408	5.22939	1.70074e-07	9.7591e-07	NW_011933238.1	163852	166526	+	beta-1,3-galactosyltransferase 5-like
LOC105422456	64.8681	3.23226	0.411357	7.85755	3.91716e-15	6.09585e-14	NW_011933397.1	15975	16540	+	uncharacterized LOC105422456
LOC105430532	125.095	3.21882	0.385264	8.35484	6.552e-17	1.24903e-15	NW_011933718.1	3128036	3132322	+	transcription factor 21
LOC105432123	54.1026	3.201	0.380973	8.40217	4.38317e-17	8.45442e-16	NW_011933758.1	662713	666520	+	protein scarlet, transcript variant X2
LOC105426036	127.805	3.19349	0.386132	8.27047	1.33433e-16	2.42669e-15	NW_011933614.1	346804	351065	+	intraflagellar transport protein 81 homolog
LOC105427263	960.21	3.18602	0.21552	14.7829	1.88752e-49	3.12891e-47	NW_011933656.1	100210	109897	+	glutamyl aminopeptidase-like
LOC105430131	12.8619	3.17313	0.762944	4.15906	3.1956e-05	0.000124366	NW_011933716.1	593602	602921	+	dentin sialophosphoprotein-like
LOC105427675	441.137	3.1548	0.19193	16.4373	1.0343e-60	2.88543e-58	NW_011933669.1	2453788	2470544	-	serine-enriched protein, transcript variant X3
LOC105423996	5.75132	3.13294	0.971099	3.22618	0.00125456	0.00357935	NW_011933543.1	345769	346524	+	uncharacterized LOC105423996, transcript variant X2
LOC105421994	435.284	3.10956	0.521282	5.96522	2.44306e-09	1.84691e-08	NW_011933355.1	596707	598778	-	fungus-induced protein 1, transcript variant X2
LOC105422538	4.87103	3.10419	1.02492	3.0287	0.00245608	0.00645958	NW_011931346.1	782	1239	-	uncharacterized LOC105422538
LOC105424888	566.976	3.05024	0.21836	13.9688	2.41549e-44	2.81922e-42	NW_011933577.1	979321	987373	+	sodium-coupled monocarboxylate transporter 1
LOC105429433	9359.23	3.03711	0.558801	5.43505	5.47815e-08	3.398e-07	NW_011933704.1	311524	313869	-	uncharacterized LOC105429433
LOC105423214	38.2379	3.03306	0.657084	4.61594	3.91324e-06	1.82408e-05	NW_011933455.1	519486	523816	+	protein takeout
LOC105428239	288.848	3.01873	0.245622	12.2901	1.02326e-34	7.75099e-33	NW_011933682.1	667904	689128	-	ras guanine nucleotide exchange factor R-like
LOC105432514	3.31598	3.01856	1.30538	2.31239	0.0207562	0.042334	NW_011933763.1	1337583	1339213	+	uncharacterized LOC105432514
LOC105423372	1570.27	3.00385	0.197223	15.2307	2.21053e-52	4.21401e-50	NW_011933463.1	291786	299352	+	uncharacterized LOC105423372, transcript variant X4
LOC105425330	84.8723	2.99853	0.297119	10.092	5.99242e-24	2.14863e-22	NW_011933592.1	821651	823333	+	uncharacterized LOC105425330
LOC105427980	20.6762	2.98288	0.633234	4.71055	2.47053e-06	1.19232e-05	NW_011933674.1	1180152	1185136	-	protein yellow
LOC112552363	135.812	2.94165	0.200077	14.7026	6.20187e-49	1.01338e-46	NW_011933502.1	442727	446102	+	uncharacterized LOC112552363
LOC105425295	102.254	2.92515	0.354455	8.25254	1.55062e-16	2.79307e-15	NW_011933592.1	113930	153868	-	uncharacterized LOC105425295, transcript variant X4
LOC105424575	13.931	2.90687	0.795617	3.6536	0.000258586	0.000843372	NW_011933571.1	586183	587634	+	15-hydroxyprostaglandin dehydrogenase [NAD(+)]-like
LOC105431607	40.6412	2.90636	0.518692	5.60326	2.10362e-08	1.39809e-07	NW_011933745.1	532959	544117	-	cadherin-23
LOC105424992	31.9226	2.905	0.622955	4.66326	3.11234e-06	1.47469e-05	NW_011933207.1	21643	26644	+	glutamyl aminopeptidase-like
LOC105429161	157.253	2.89897	0.301759	9.60692	7.47551e-22	2.29236e-20	NW_011933698.1	21547	31451	+	proton-coupled amino acid transporter-like protein CG1139
LOC105427317	74.7392	2.89845	0.395351	7.33135	2.27852e-13	2.85139e-12	NW_011933663.1	196705	206974	-	zinc finger protein 394-like, transcript variant X1
LOC105426323	25.9605	2.8914	0.44206	6.54074	6.12166e-11	5.72991e-10	NW_011933624.1	288602	292392	+	interaptin-like
LOC105428205	88.0687	2.87444	0.410071	7.00962	2.38968e-12	2.64856e-11	NW_011933681.1	904907	907990	-	leukotriene A-4 hydrolase-like, transcript variant X2
LOC105434255	9.14365	2.87125	0.710081	4.04355	5.26477e-05	0.000196535	NW_011933351.1	249288	257397	+	DC-STAMP domain-containing protein 2-like
LOC105424293	54.2527	2.84871	0.410391	6.94144	3.8811e-12	4.18793e-11	NW_011933558.1	269004	286306	+	GATA-binding factor 6-A-like, transcript variant X2
LOC105422852	125.836	2.81668	0.311747	9.03516	1.6376e-19	4.04554e-18	NW_011933420.1	821948	827576	-	transmembrane protease serine 9-like
LOC105424351	5.98603	2.81468	1.10443	2.54855	0.0108173	0.0237756	NW_011933559.1	360502	378228	-	ATP-binding cassette sub-family A member 2-like
LOC105426649	162.13	2.81269	0.355682	7.90788	2.61804e-15	4.17063e-14	NW_011933635.1	493354	494367	+	zinc finger protein 540-like
LOC105432589	6.00351	2.8069	1.19244	2.35391	0.0185773	0.038369	NW_011933764.1	1270726	1272799	+	trypsin-1-like
LOC105422859	290.042	2.79908	0.287228	9.74513	1.93522e-22	6.28835e-21	NW_011933420.1	1113166	1151159	+	uncharacterized LOC105422859
LOC105423309	39.6801	2.77545	0.601551	4.61383	3.95319e-06	1.84032e-05	NW_011931806.1	266	1497	+	cytochrome P450 4C1-like
LOC105432559	161.992	2.77428	0.727747	3.81215	0.000137765	0.000473628	NW_011933764.1	854721	857671	+	uncharacterized LOC105432559, transcript variant X1
LOC105423235	12.95	2.77426	0.731892	3.79053	0.000150325	0.000511885	NW_011933455.1	687060	701985	+	homeobox protein Nkx-2.2a-like, transcript variant X2
LOC105428429	260.946	2.75979	0.245038	11.2627	2.00462e-29	1.07647e-27	NW_011933686.1	1193683	1197574	-	monocarboxylate transporter 3-like, transcript variant X2
LOC112552308	4.67737	2.7494	1.19291	2.30479	0.0211785	0.0431186	NW_011931664.1	5259	9771	-	aminopeptidase N-like, transcript variant X2
LOC105432550	269.924	2.74405	0.286487	9.57826	9.86892e-22	3.00215e-20	NW_011933764.1	324673	326503	+	uncharacterized LOC105432550
LOC105428629	91.1471	2.73162	0.307789	8.87498	6.99473e-19	1.61302e-17	NW_011933693.1	401213	404016	+	endocuticle structural glycoprotein SgAbd-2-like
LOC105432824	4.83538	2.72736	1.0095	2.70168	0.00689895	0.0160061	NW_011933766.1	580836	583493	+	uncharacterized LOC105432824
LOC105422873	13.0885	2.7218	0.725508	3.75158	0.000175723	0.000590633	NW_011933420.1	1437527	1439047	+	uncharacterized LOC105422873, transcript variant X3
LOC105426322	577.635	2.71395	0.266447	10.1857	2.29738e-24	8.44935e-23	NW_011933624.1	254647	259228	-	cytochrome P450 307a1-like
LOC105433784	213.969	2.71341	0.403893	6.71814	1.8406e-11	1.8275e-10	NW_011933333.1	58614	60537	-	caspase-1-like
LOC105429557	16.4294	2.6968	0.628622	4.29002	1.78657e-05	7.29032e-05	NW_011933704.1	1586047	1647101	-	retinal homeobox protein Rx3-like
LOC105429641	70.5775	2.68655	0.316966	8.47584	2.33392e-17	4.56331e-16	NW_011933708.1	294217	295762	+	uncharacterized LOC105429641
LOC105430192	36.4312	2.68569	0.467017	5.75073	8.88577e-09	6.25449e-08	NW_011933717.1	894486	901561	-	uncharacterized LOC105430192, transcript variant X7
LOC105433754	5.61663	2.68333	0.952923	2.8159	0.00486415	0.0117351	NW_011933330.1	185725	189118	-	uncharacterized LOC105433754
LOC105426889	18.2816	2.68157	0.817748	3.27922	0.00104096	0.00302886	NW_011933643.1	16064	17863	-	uncharacterized LOC105426889
LOC105430242	80.4287	2.67802	0.632464	4.23426	2.29308e-05	9.17713e-05	NW_011933717.1	1473451	1476420	+	uncharacterized LOC105430242, transcript variant X1
LOC105430937	7.23874	2.67386	1.13517	2.35548	0.0184987	0.0382481	NW_011933725.1	2658376	2661053	-	farnesyl pyrophosphate synthase-like
LOC105424467	15.8485	2.66419	0.820392	3.24746	0.00116441	0.00334973	NW_011933568.1	500841	509427	-	LIM/homeobox protein Lhx3
LOC105424327	16.8662	2.65658	0.597413	4.4468	8.71576e-06	3.79775e-05	NW_011933559.1	172462	194355	-	nose resistant to fluoxetine protein 6
LOC105432475	2214.37	2.64909	0.545234	4.85863	1.18204e-06	5.96126e-06	NW_011933763.1	2805734	2813117	-	uncharacterized LOC105432475, transcript variant X1
LOC105432391	107.882	2.63148	0.317659	8.28397	1.19137e-16	2.19082e-15	NW_011933763.1	1025494	1030001	+	retinol dehydrogenase 14
LOC105427213	111.287	2.62869	0.379825	6.92078	4.4915e-12	4.79681e-11	NW_011933238.1	156106	163316	-	coiled-coil domain-containing protein 39
LOC105428926	226.848	2.60186	0.228114	11.406	3.9047e-30	2.22199e-28	NW_011933695.1	2320704	2323283	-	uncharacterized LOC105428926
LOC105427694	130.184	2.60006	0.279464	9.30377	1.35554e-20	3.75416e-19	NW_011933670.1	82629	86518	+	coiled-coil domain-containing protein 40
LOC105432864	168.164	2.5913	0.31598	8.20086	2.38682e-16	4.22608e-15	NW_011933766.1	1067289	1072770	-	forkhead box protein D4-like 1
LOC112552276	33.7017	2.56997	0.922212	2.78675	0.00532394	0.0127024	NW_011933408.1	163107	163262	-	5.8S ribosomal RNA
LOC105431081	21.4771	2.56295	0.525472	4.87743	1.07478e-06	5.45885e-06	NW_011933728.1	535009	536539	+	uncharacterized LOC105431081
LOC105423398	49.1636	2.56158	0.325552	7.86842	3.59142e-15	5.62721e-14	NW_011933465.1	440632	469345	-	uncharacterized LOC105423398
LOC105424024	3.31926	2.55845	1.11446	2.29569	0.0216937	0.0439872	NW_011933543.1	637883	641939	-	odorant receptor 13a-like
LOC105431433	51.156	2.55615	0.408638	6.25528	3.96816e-10	3.34718e-09	NW_011933742.1	186585	189758	-	estrogen sulfotransferase, transcript variant X2
LOC105423471	146.054	2.55099	0.279866	9.11503	7.86483e-20	2.02153e-18	NW_011933478.1	8172	27640	-	uncharacterized LOC105423471
LOC105424284	6.61707	2.54981	0.923101	2.76223	0.00574087	0.0135951	NW_011933558.1	158757	159407	-	BAG family molecular chaperone regulator 6-like
LOC105430889	26.5118	2.51528	0.584027	4.30678	1.6565e-05	6.8057e-05	NW_011933725.1	1078740	1082605	+	uncharacterized LOC105430889
LOC105434152	575.081	2.51257	0.246618	10.1881	2.24104e-24	8.26871e-23	NW_011933341.1	488624	491468	+	uncharacterized LOC105434152
LOC105433013	2144.32	2.50635	0.146335	17.1275	9.25639e-66	3.41531e-63	NW_011933767.1	1061170	1063818	+	thymidylate synthase
LOC105424969	94.4557	2.49474	0.347465	7.17983	6.97997e-13	8.3337e-12	NW_011933582.1	196306	197188	+	uncharacterized LOC105424969
LOC105432899	1566.51	2.48851	0.241057	10.3233	5.52815e-25	2.14342e-23	NW_011933766.1	1553142	1558877	+	retinoid-inducible serine carboxypeptidase-like, transcript variant X2
LOC105433831	99.3547	2.48775	0.35173	7.0729	1.51734e-12	1.72347e-11	NW_011930311.1	7	1487	-	cytochrome P450 315a1, mitochondrial
LOC105429762	327.285	2.47883	0.655006	3.78443	0.00015406	0.0005232	NW_011933709.1	1016239	1022295	+	elongation of very long chain fatty acids protein 4-like
LOC105423447	6868.83	2.47075	0.229973	10.7437	6.34827e-27	2.88141e-25	NW_011933468.1	53604	58532	+	uncharacterized LOC105423447, transcript variant X1
LOC105434280	1763.25	2.46617	0.180139	13.6903	1.15977e-42	1.27553e-40	NW_011933353.1	108151	115530	-	putative leucine-rich repeat-containing protein DDB_G0290503
LOC105424881	78.8293	2.46357	0.436327	5.64615	1.64079e-08	1.10591e-07	NW_011933577.1	926002	939767	-	facilitated trehalose transporter Tret1-like, transcript variant X3
LOC105426291	6284.18	2.46325	0.207711	11.859	1.93236e-32	1.29254e-30	NW_011933623.1	382323	400879	-	uncharacterized LOC105426291
LOC105433176	585.534	2.46314	0.189885	12.9718	1.76866e-38	1.64471e-36	NW_011933770.1	621132	623888	-	uncharacterized LOC105433176
LOC105425002	1686.09	2.45824	0.149914	16.3976	1.98935e-60	5.17142e-58	NW_011933583.1	208972	210931	-	transmembrane protein 177, transcript variant X2
LOC105422849	1849.73	2.45505	0.935508	2.6243	0.00868277	0.0195422	NW_011933420.1	818263	821530	+	carboxypeptidase B-like
LOC112552297	229.533	2.45235	0.272765	8.99073	2.45592e-19	5.98951e-18	NW_011933420.1	238598	242622	-	aminopeptidase N-like
LOC105423239	195.78	2.45065	0.251891	9.72898	2.26862e-22	7.30943e-21	NW_011933455.1	762664	769607	+	kinesin-like protein Klp61F
LOC105431019	6534.06	2.45013	0.155559	15.7505	6.81446e-56	1.47064e-53	NW_011933727.1	213865	218838	-	GATA zinc finger domain-containing protein 14-like, transcript variant X2
LOC112552931	27.6728	2.44632	0.599232	4.08243	4.45674e-05	0.000168349	NW_011933743.1	29800	31317	-	uncharacterized LOC112552931
LOC105432033	3.81048	2.44185	1.07701	2.26726	0.0233744	0.0470202	NW_011933303.1	607049	609913	-	uncharacterized LOC105432033
LOC105429436	4.66621	2.43985	1.06935	2.28162	0.0225118	0.0454448	NW_011933704.1	303700	304212	+	uncharacterized LOC105429436
LOC105430202	30.5383	2.4375	0.562393	4.33417	1.46314e-05	6.07456e-05	NW_011933717.1	997042	999792	-	SET and MYND domain-containing protein 4-like
LOC105426382	15.0124	2.43178	0.724308	3.35739	0.000786826	0.00234063	NW_011933624.1	797926	811693	-	uncharacterized LOC105426382
LOC105428658	7.06713	2.43061	0.808355	3.00686	0.00263958	0.00687577	NW_011929832.1	245	694	+	uncharacterized LOC105428658
LOC105422581	8.94614	2.42371	0.781375	3.10186	0.00192311	0.00519522	NW_011933406.1	719195	929361	-	uncharacterized LOC105422581
LOC105430738	81.3796	2.41789	0.458078	5.27835	1.30355e-07	7.59939e-07	NW_011933722.1	242881	258748	-	ABC transporter G family member 21
LOC105425704	15.575	2.41304	0.713318	3.38284	0.000717398	0.00214975	NW_011933605.1	608097	612576	-	uncharacterized LOC105425704
LOC105426295	2637.21	2.41268	0.197784	12.1986	3.16248e-34	2.2894e-32	NW_011933623.1	343527	348721	-	aminopeptidase N-like
LOC105425441	10.9379	2.39799	0.686769	3.49169	0.000479969	0.00148939	NW_011933594.1	411344	415238	-	uncharacterized LOC105425441, transcript variant X1
LOC105423263	1853.84	2.39752	0.218645	10.9654	5.60738e-28	2.70621e-26	NW_011933455.1	677201	684426	+	FK506-binding protein 4-like
LOC105430581	1417.42	2.39543	0.221094	10.8345	2.36298e-27	1.09869e-25	NW_011933293.1	23995	26847	+	farnesyl pyrophosphate synthase-like
LOC105433142	12.4078	2.38268	0.823805	2.89229	0.00382443	0.00948478	NW_011933770.1	21449	23732	-	uncharacterized LOC105433142
LOC105431327	54.8045	2.38123	0.317375	7.50289	6.24254e-14	8.38053e-13	NW_011933738.1	100157	101665	-	proline-rich proteoglycan 2-like, transcript variant X2
LOC105422926	3281.01	2.3711	0.14939	15.8719	9.9181e-57	2.22438e-54	NW_011933420.1	247773	254831	-	aminopeptidase N-like
LOC105425008	1924.27	2.36759	0.162386	14.58	3.76375e-48	5.73997e-46	NW_011933583.1	279638	281945	-	uncharacterized LOC105425008
LOC112552924	34.921	2.3561	0.454801	5.1805	2.21292e-07	1.24564e-06	NW_011933738.1	97337	98911	-	uncharacterized LOC112552924
LOC105432663	32.3225	2.35597	0.428408	5.49937	3.81155e-08	2.43149e-07	NW_011933765.1	115024	121618	-	katanin p60 ATPase-containing subunit A-like 2, transcript variant X2
LOC105422215	38.4539	2.35244	0.530978	4.43039	9.40631e-06	4.05691e-05	NW_011933373.1	172518	176205	+	dynein assembly factor with WDR repeat domains 1-like
LOC105431364	41.3951	2.35237	0.408983	5.75176	8.83209e-09	6.22436e-08	NW_011933738.1	35152	37865	-	odorant receptor 9a-like
LOC105433231	9.69882	2.34916	0.685388	3.42749	0.000609197	0.0018527	NW_011933307.1	386461	387735	-	pre-mRNA-splicing factor cwc2-like, transcript variant X2
LOC105430129	97.5289	2.33762	0.289233	8.08215	6.36334e-16	1.08471e-14	NW_011933716.1	524226	527493	+	uncharacterized LOC105430129
LOC105427787	1185.81	2.31928	0.20476	11.3268	9.66504e-30	5.31484e-28	NW_011933671.1	264115	272443	-	ras GTPase-activating-like protein IQGAP1
LOC105425952	53.6994	2.31783	0.51718	4.48167	7.4061e-06	3.26691e-05	NW_011933614.1	223802	233526	+	ionotropic receptor 25a
LOC105430247	3265.8	2.31135	0.109263	21.1539	2.53895e-99	2.64005e-96	NW_011933717.1	1497737	1525502	-	myb protein, transcript variant X2
LOC105431853	615.82	2.31126	0.139565	16.5604	1.34613e-61	3.94796e-59	NW_011933750.1	216435	226338	-	DNA polymerase theta
LOC105423560	86525.5	2.30817	0.317202	7.27664	3.42236e-13	4.20462e-12	NW_011933501.1	65070	68150	-	uncharacterized LOC105423560
LOC105430600	68.2454	2.3049	0.312481	7.37614	1.62948e-13	2.06401e-12	NW_011933720.1	36517	42234	-	segmentation protein even-skipped, transcript variant X1
LOC105423997	13.2381	2.30246	0.691241	3.33091	0.00086564	0.00255779	NW_011933543.1	350415	360411	+	uncharacterized LOC105423997
LOC105431533	233.526	2.2998	0.401779	5.72405	1.04017e-08	7.23688e-08	NW_011933744.1	673532	682201	+	alpha-glucosidase-like, transcript variant X3
LOC105432920	332.945	2.29302	0.227313	10.0875	6.27377e-24	2.24248e-22	NW_011933766.1	1655851	1657113	-	uncharacterized LOC105432920
LOC105433510	21.0053	2.29265	0.457155	5.01504	5.30219e-07	2.82998e-06	NW_011930175.1	131	695	-	kinesin-like protein KIF19
LOC105422167	13.0242	2.29209	0.618999	3.70289	0.000213155	0.000707194	NW_011933367.1	228057	231168	+	uncharacterized LOC105422167, transcript variant X1
LOC105433175	316.23	2.28734	0.167359	13.6673	1.59255e-42	1.73482e-40	NW_011933770.1	623697	625017	-	uncharacterized LOC105433175
LOC105430377	313.582	2.28544	0.240231	9.5135	1.8435e-21	5.54895e-20	NW_011933718.1	757443	781125	+	glycogen-binding subunit 76A, transcript variant X1
LOC105429567	1441.5	2.28183	0.200886	11.3589	6.70079e-30	3.77555e-28	NW_011933705.1	170636	174661	+	G2/mitotic-specific cyclin-B
LOC105422444	41.7712	2.27946	0.473357	4.81552	1.46814e-06	7.2695e-06	NW_011933392.1	44916	56273	-	esterase E4-like
LOC105423652	657.901	2.26829	0.285441	7.94661	1.91681e-15	3.09668e-14	NW_011933507.1	110082	122485	+	tyrosine 3-monooxygenase, transcript variant X1
LOC105427552	146.387	2.26825	0.394503	5.74963	8.94406e-09	6.29165e-08	NW_011933668.1	701391	706035	+	major facilitator superfamily domain-containing protein 12-like, transcript variant X2
LOC105429359	32.7833	2.25938	0.597538	3.78115	0.000156106	0.000529363	NW_011933702.1	879059	902524	-	scavenger receptor class B member 1-like
LOC105431262	12.5777	2.25763	0.785005	2.87594	0.00402827	0.0099386	NW_011933734.1	544721	553910	+	toll-like receptor 3, transcript variant X2
LOC105422618	172.764	2.25593	0.325599	6.92855	4.25178e-12	4.55781e-11	NW_011933407.1	3922	9128	-	glutathione S-transferase theta-1-like
LOC112552656	5.0596	2.25264	0.86493	2.60442	0.00920298	0.0205553	NW_011933667.1	1774794	1777947	-	odorant receptor 13a-like
LOC105432951	72.3204	2.24838	0.371112	6.0585	1.37397e-09	1.07346e-08	NW_011933766.1	584547	590669	-	uncharacterized LOC105432951
LOC105426266	1445.85	2.24359	0.194477	11.5365	8.63583e-31	5.09158e-29	NW_011933622.1	732862	736645	+	protein claret segregational, transcript variant X2
LOC105425156	1338.6	2.2425	0.390973	5.73568	9.71221e-09	6.79854e-08	NW_011933590.1	59111	67293	+	slowpoke-binding protein, transcript variant X5
LOC105432957	388.312	2.22839	0.22391	9.9522	2.46666e-23	8.54959e-22	NW_011933766.1	1559310	1561670	+	forkhead box protein D3-like
LOC105423311	25.4319	2.22336	0.448943	4.95243	7.32921e-07	3.83493e-06	NW_011933457.1	810790	856143	+	alkaline phosphatase-like
LOC105433804	59.4145	2.22137	0.279471	7.94848	1.88809e-15	3.05459e-14	NW_011933334.1	75397	83688	+	peroxidase-like
LOC105425438	16.2128	2.21679	0.540259	4.1032	4.07483e-05	0.000155205	NW_011933594.1	362951	369273	+	uncharacterized LOC105425438, transcript variant X2
LOC105428383	11.9238	2.21541	0.724097	3.05955	0.00221671	0.00589096	NW_011933686.1	572932	575046	+	probable uridine nucleosidase 2
LOC105423588	759.408	2.21032	0.186905	11.8259	2.86707e-32	1.85275e-30	NW_011933502.1	457130	474337	-	zinc finger protein 888, transcript variant X9
LOC105432565	39.6859	2.2031	0.367086	6.0016	1.95384e-09	1.49321e-08	NW_011933764.1	948939	955154	+	glutamate receptor ionotropic, delta-2, transcript variant X1
LOC105433764	31.1423	2.20107	0.484703	4.54107	5.597e-06	2.53237e-05	NW_011933330.1	390196	391825	+	ATP-dependent Clp protease ATP-binding subunit clpX-like, mitochondrial
LOC105429894	1447.24	2.19329	0.16561	13.2437	4.90603e-40	4.83751e-38	NW_011933712.1	1522330	1532284	+	uncharacterized LOC105429894, transcript variant X3
LOC105433785	28.9155	2.18967	0.61752	3.54591	0.000391253	0.00123214	NW_011933333.1	66050	66664	-	uncharacterized LOC105433785
LOC105422022	9.92854	2.18856	0.868012	2.52134	0.0116907	0.0254848	NW_011933355.1	919564	922145	+	CD63 antigen
LOC105425756	124.345	2.18429	0.424003	5.15158	2.58301e-07	1.4426e-06	NW_011933607.1	148840	162275	-	putative uncharacterized protein DDB_G0271606, transcript variant X1
LOC105428331	12.4789	2.18359	0.641641	3.40313	0.000666185	0.00200733	NW_011933684.1	171277	174801	-	histidine-rich glycoprotein-like
LOC105421957	1926.03	2.174	0.232928	9.33336	1.02569e-20	2.87546e-19	NW_011933354.1	1410763	1418226	-	neuropeptides capa receptor-like
LOC105431384	241.475	2.16343	0.653297	3.31156	0.000927774	0.00272654	NW_011933739.1	249036	250989	+	probable low-specificity L-threonine aldolase 2
LOC105424236	3765.77	2.16189	0.119433	18.1013	3.1128e-73	1.61837e-70	NW_011933555.1	805498	807634	+	uncharacterized LOC105424236
LOC105425820	564.846	2.15953	0.308194	7.00704	2.43411e-12	2.69207e-11	NW_011933608.1	580966	585362	+	uncharacterized LOC105425820
LOC105425923	12.8342	2.15231	0.623033	3.45457	0.000551167	0.00169287	NW_011933613.1	465078	467891	+	uncharacterized LOC105425923
LOC105429552	8.91478	2.14604	0.672419	3.19152	0.00141528	0.00397642	NW_011933704.1	873444	876579	-	odorant receptor 63a-like
LOC105422858	404.57	2.13112	0.303757	7.01588	2.28508e-12	2.54496e-11	NW_011933420.1	1132524	1195444	+	voltage-dependent L-type calcium channel subunit beta-2, transcript variant X1
LOC105426784	67.5923	2.13019	0.467003	4.5614	5.08131e-06	2.32294e-05	NW_011933637.1	549034	564512	-	uncharacterized LOC105426784
LOC105422528	76.067	2.12969	0.409703	5.19813	2.01303e-07	1.13929e-06	NW_011933404.1	874979	876971	+	serine/threonine-protein kinase Nek5-like, transcript variant X2
LOC105433360	3055.04	2.12897	0.119598	17.8011	6.93028e-71	2.93587e-68	NW_011933312.1	47576	52997	+	uncharacterized LOC105433360
LOC105426460	103.172	2.12841	0.297282	7.15958	8.09266e-13	9.62202e-12	NW_011933631.1	174574	177534	-	GTP:AMP phosphotransferase AK3, mitochondrial
LOC105432528	11.3925	2.1262	0.945845	2.24794	0.0245803	0.0492422	NW_011933763.1	2815244	2817594	+	putative odorant receptor 69a
LOC105422369	257.266	2.12547	0.157435	13.5007	1.54928e-41	1.62575e-39	NW_011933381.1	261476	270226	+	uncharacterized LOC105422369, transcript variant X1
LOC105431718	25.7954	2.12302	0.439116	4.83477	1.33299e-06	6.66089e-06	NW_011933748.1	985526	986221	+	uncharacterized LOC105431718
LOC105424285	50.6069	2.12258	0.415697	5.10609	3.28897e-07	1.81736e-06	NW_011933558.1	155730	163482	-	uncharacterized LOC105424285
LOC105426645	717.576	2.12161	0.188428	11.2596	2.078e-29	1.10549e-27	NW_011933635.1	372039	377300	+	N-acetylglucosamine-6-sulfatase-like, transcript variant X2
LOC105428101	13.9021	2.11927	0.765548	2.7683	0.00563488	0.0133773	NW_011933252.1	14786	17490	+	probable cytochrome P450 6a14
LOC105422054	75.7836	2.11776	0.343308	6.16869	6.8857e-10	5.61759e-09	NW_011933356.1	325265	342966	-	ecdysone-induced protein 74EF, transcript variant X3
LOC112552701	5.19652	2.11739	0.888318	2.38359	0.0171447	0.0357783	NW_011929818.1	6790	7276	-	histone acetyltransferase KAT2A-like
LOC105433522	280.621	2.11426	0.288997	7.31585	2.5575e-13	3.17965e-12	NW_011933322.1	66889	69611	-	uncharacterized LOC105433522
LOC105427217	154.617	2.10849	0.409108	5.15387	2.5517e-07	1.42581e-06	NW_011933653.1	1260087	1264467	+	spidroin-1-like
LOC105424810	1793.03	2.10648	0.162591	12.9557	2.1807e-38	1.99543e-36	NW_011933577.1	395662	399216	-	targeting protein for Xklp2 homolog
LOC105426183	1662.34	2.10588	0.214151	9.83363	8.06584e-23	2.66639e-21	NW_011933621.1	273722	275985	-	lymphokine-activated killer T-cell-originated protein kinase
LOC105425145	22.0225	2.10568	0.535948	3.92888	8.53431e-05	0.000306004	NW_011933589.1	178934	195533	+	glycoprotein 3-alpha-L-fucosyltransferase A
LOC105425998	87.9589	2.10147	0.512398	4.10123	4.10951e-05	0.000156369	NW_011933614.1	567500	569723	+	carbohydrate sulfotransferase 11-like
LOC105423695	44.6662	2.09789	0.444832	4.71615	2.40354e-06	1.16048e-05	NW_011933509.1	79354	81395	+	actin, muscle
LOC105428586	28.2104	2.09282	0.496218	4.21754	2.46981e-05	9.82941e-05	NW_011929830.1	958	3709	+	gamma-aminobutyric acid receptor alpha-like
LOC105426822	24.109	2.08592	0.567568	3.67519	0.000237672	0.000782076	NW_011933638.1	309612	315549	-	receptor-type tyrosine-protein phosphatase S-like
LOC105433234	10.4239	2.0823	0.616943	3.37519	0.000737638	0.00220348	NW_011933307.1	419107	420535	-	uncharacterized LOC105433234
LOC105426406	9.95287	2.0699	0.768049	2.69502	0.00703854	0.016287	NW_011933624.1	791928	794069	-	odorant receptor 9a-like
LOC105432389	18.6908	2.06148	0.501127	4.11368	3.89405e-05	0.000148964	NW_011933763.1	1023220	1024900	+	uncharacterized LOC105432389
LOC112552498	37.1249	2.05952	0.466504	4.41479	1.0111e-05	4.33307e-05	NW_011933600.1	715740	716803	+	uncharacterized LOC112552498
LOC105428604	13.875	2.05848	0.57909	3.55469	0.000378431	0.00119473	NW_011933692.1	335783	337114	+	uncharacterized LOC105428604
LOC105430427	2713.25	2.05561	0.170481	12.0577	1.76683e-33	1.26306e-31	NW_011933718.1	1199328	1204463	+	uncharacterized LOC105430427, transcript variant X1
LOC105422540	497.986	2.05024	0.205867	9.95904	2.3028e-23	8.00589e-22	NW_011933404.1	1004120	1008502	-	E3 ubiquitin-protein ligase RNF14-like
LOC105423737	55.823	2.04365	0.404037	5.05809	4.23477e-07	2.30325e-06	NW_011933512.1	324360	325648	+	uncharacterized LOC105423737
LOC105432141	5.78915	2.04287	0.820013	2.49126	0.0127291	0.0275072	NW_011933758.1	1209642	1212042	-	uncharacterized LOC105432141
LOC105434296	3299.51	2.03755	0.149532	13.6261	2.79984e-42	3.02118e-40	NW_011933353.1	466177	470331	-	protein Spindly-like, transcript variant X2
LOC105424097	179.247	2.03388	0.257378	7.9023	2.73812e-15	4.34378e-14	NW_011933550.1	140338	174652	+	insulin gene enhancer protein ISL-1, transcript variant X1
LOC105432047	1489.95	2.02381	0.14343	14.1101	3.29015e-45	4.13547e-43	NW_011933757.1	962589	964080	+	uncharacterized LOC105432047
LOC105423382	136.281	2.01113	0.407906	4.93039	8.20672e-07	4.25129e-06	NW_011933465.1	166341	179818	-	uncharacterized LOC105423382, transcript variant X1
LOC105431259	9.7159	2.00924	0.756601	2.65561	0.00791642	0.0180303	NW_011933734.1	534006	541737	+	uncharacterized LOC105431259, transcript variant X1
LOC105431295	8.68801	2.00444	0.774364	2.58849	0.0096397	0.0214261	NW_011933735.1	59581	64120	-	estradiol 17-beta-dehydrogenase 11-like
LOC105424201	927.162	2.00252	0.155838	12.85	8.59752e-38	7.68269e-36	NW_011933555.1	198645	226407	-	multiple C2 and transmembrane domain-containing protein, transcript variant X8
LOC105428628	88.0912	1.99733	0.422755	4.72456	2.30618e-06	1.11724e-05	NW_011933693.1	382634	390549	+	endocuticle structural glycoprotein SgAbd-2-like
LOC105430732	14.3184	1.99336	0.64305	3.09986	0.00193615	0.00522675	NW_011933722.1	45370	48305	-	eclosion hormone, transcript variant X2
LOC105425302	945.416	1.98914	0.248522	8.00391	1.20532e-15	1.99514e-14	NW_011933592.1	343398	350940	-	progestin and adipoQ receptor family member 3
LOC105426535	2457.13	1.98441	0.18546	10.6999	1.019e-26	4.48283e-25	NW_011933632.1	264542	268414	+	kinesin-like protein KIF18A
LOC105429789	12.8676	1.98257	0.651492	3.04313	0.00234132	0.00619333	NW_011933710.1	50313	51822	-	uncharacterized LOC105429789
LOC105426092	164.65	1.97898	0.286619	6.90457	5.03574e-12	5.35803e-11	NW_011933616.1	102060	103727	-	SEC14-like protein 4
LOC105428794	13.6709	1.96546	0.618024	3.18023	0.00147158	0.00411236	NW_011933695.1	14871	18777	+	uncharacterized LOC105428794
LOC112552460	18.7672	1.96511	0.581773	3.37779	0.000730705	0.0021839	NW_011933577.1	969165	971295	+	uncharacterized LOC112552460
LOC105422807	638.71	1.96469	0.157037	12.511	6.49758e-36	5.27088e-34	NW_011933420.1	213702	218164	-	uncharacterized LOC105422807
LOC105431226	2652.56	1.96221	0.160947	12.1917	3.44143e-34	2.47567e-32	NW_011933734.1	133430	155728	+	chromosome-associated kinesin KIF4A, transcript variant X1
LOC105433977	830.917	1.9603	0.657605	2.98096	0.00287346	0.00740195	NW_011933339.1	288649	289877	+	follicle cell protein 3C-1, transcript variant X2
LOC105422529	331.942	1.95863	0.207421	9.44279	3.62977e-21	1.06455e-19	NW_011933404.1	877342	883448	+	MAM and LDL-receptor class A domain-containing protein 1-like, transcript variant X1
LOC105422927	2076.08	1.95398	0.218029	8.962	3.1884e-19	7.66154e-18	NW_011933420.1	255806	263016	-	aminopeptidase N-like
LOC105430543	914.681	1.9508	0.157578	12.3799	3.35865e-35	2.57827e-33	NW_011933718.1	592973	599302	-	uncharacterized LOC105430543
LOC105429858	2842.67	1.94993	0.121379	16.0648	4.50279e-58	1.07298e-55	NW_011933712.1	567021	576699	+	uncharacterized LOC105429858
LOC105426288	38.6478	1.9463	0.38228	5.0913	3.55609e-07	1.95457e-06	NW_011933623.1	309068	319780	+	sodium- and chloride-dependent transporter XTRP3, transcript variant X1
LOC105430334	223.654	1.9379	0.138991	13.9426	3.48932e-44	4.0314e-42	NW_011933718.1	412695	418720	+	serine/threonine-protein kinase dyf-5, transcript variant X1
LOC105429087	13.481	1.93639	0.537617	3.6018	0.000316016	0.00101619	NW_011933697.1	1537727	1545557	-	urea transporter 1-like
LOC105434206	1982.39	1.9352	0.161743	11.9647	5.4416e-33	3.77218e-31	NW_011933350.1	139320	143700	+	segmentation protein Runt-like
LOC105431089	2129.97	1.92947	0.178385	10.8164	2.8799e-27	1.32824e-25	NW_011933728.1	721647	726531	-	D-beta-hydroxybutyrate dehydrogenase, mitochondrial, transcript variant X2
LOC105426072	246.342	1.9262	0.223045	8.63594	5.82465e-18	1.21131e-16	NW_011933217.1	239910	245681	-	two pore potassium channel protein sup-9
LOC105427575	714.593	1.92097	0.205847	9.33204	1.03849e-20	2.9042e-19	NW_011929818.1	22980	24418	+	baculoviral IAP repeat-containing protein 5, transcript variant X1
LOC105431124	104.624	1.91471	0.376093	5.09107	3.56053e-07	1.95607e-06	NW_011933728.1	278925	287305	-	facilitated trehalose transporter Tret1-like
LOC105427020	26.9173	1.90945	0.52657	3.6262	0.000287618	0.000930629	NW_011933649.1	366477	371381	-	lipase 3-like
LOC105428845	1214.89	1.90708	0.190478	10.0121	1.34894e-23	4.70401e-22	NW_011933263.1	113114	116281	+	uncharacterized LOC105428845
LOC105423281	38.7231	1.90023	0.594755	3.19497	0.00139844	0.00393488	NW_011933457.1	145611	148462	+	ornithine decarboxylase 1-like
LOC105431083	5.63157	1.89992	0.796697	2.38474	0.0170911	0.0356729	NW_011933728.1	542786	547023	+	probable cytochrome P450 12a5, mitochondrial
LOC105433706	36.3807	1.89805	0.383849	4.94477	7.62327e-07	3.97606e-06	NW_011933330.1	208483	213630	+	fructose-bisphosphate aldolase-like
LOC105431363	39.1059	1.89465	0.360025	5.26254	1.42077e-07	8.23434e-07	NW_011933738.1	30095	34946	-	odorant receptor 13a-like
LOC105430890	8.86795	1.89285	0.817189	2.3163	0.020542	0.0419399	NW_011933725.1	1188164	1213529	+	uncharacterized LOC105430890, transcript variant X2
LOC105431979	156.493	1.89235	0.385432	4.90969	9.12203e-07	4.69145e-06	NW_011933757.1	730162	738236	-	uncharacterized LOC105431979
LOC105431730	285.369	1.88933	0.184374	10.2472	1.21761e-24	4.58128e-23	NW_011933748.1	1036602	1048936	-	sodium-independent sulfate anion transporter, transcript variant X1
LOC105422288	736.211	1.88734	0.150251	12.5612	3.45046e-36	2.81902e-34	NW_011933378.1	118708	123645	-	uncharacterized LOC105422288, transcript variant X1
LOC105428521	18.6885	1.88721	0.521801	3.61672	0.000298365	0.000964038	NW_011933687.1	428711	432183	-	uncharacterized LOC105428521
LOC105422319	639.94	1.88378	0.241667	7.79494	6.44397e-15	9.77534e-14	NW_011933378.1	615384	619035	-	luciferin 4-monooxygenase-like
LOC105426773	100.545	1.88266	0.368674	5.10655	3.2809e-07	1.81377e-06	NW_011933637.1	934280	936041	-	pupal cuticle protein C1B-like
LOC105423745	82.0988	1.88077	0.248318	7.57404	3.61803e-14	5.01005e-13	NW_011933512.1	349470	357146	+	DNA-binding protein D-ETS-6-like
LOC105428843	94.5126	1.87891	0.589444	3.1876	0.00143456	0.00402565	NW_011933695.1	1107039	1122786	-	xanthine dehydrogenase 1-like
LOC105431217	627.344	1.87276	0.152541	12.277	1.20333e-34	9.05504e-33	NW_011933734.1	113491	117185	+	uncharacterized LOC105431217, transcript variant X2
LOC105427195	105.16	1.87001	0.242778	7.70255	1.33374e-14	1.94583e-13	NW_011933653.1	479601	505413	+	probable chitinase 10
LOC105433982	10.3316	1.86877	0.661643	2.82443	0.00473642	0.0114681	NW_011930487.1	60	1158	+	retinal homeobox protein Rx-like
LOC105429780	48.3901	1.86816	0.424954	4.39614	1.1019e-05	4.69582e-05	NW_011933710.1	21655	43695	-	uncharacterized LOC105429780
LOC105434114	2987.63	1.86714	0.129619	14.4048	4.8261e-47	6.98746e-45	NW_011933341.1	953887	971577	+	myosin-IB, transcript variant X4
LOC105424627	3094.96	1.86626	0.135968	13.7258	7.11362e-43	7.97702e-41	NW_011933573.1	319045	322503	-	protein regulator of cytokinesis 1-like, transcript variant X2
LOC105432868	3567.18	1.86268	0.147583	12.6212	1.61258e-36	1.35623e-34	NW_011933766.1	1156102	1158408	+	uncharacterized LOC105432868, transcript variant X2
LOC105426150	277.432	1.85944	0.246605	7.54016	4.69395e-14	6.43758e-13	NW_011933619.1	219174	300216	+	protein kinase C-binding protein NELL1-like
LOC105427012	580.305	1.85547	0.305199	6.07954	1.20524e-09	9.4746e-09	NW_011933649.1	300803	302847	-	phospholipase A1-like, transcript variant X2
LOC105433438	426.588	1.85368	0.168838	10.979	4.82206e-28	2.36715e-26	NW_011933315.1	89843	92577	-	uncharacterized LOC105433438, transcript variant X2
LOC105423586	20.543	1.84706	0.660279	2.79739	0.00515171	0.0123352	NW_011933502.1	187404	189168	+	uncharacterized LOC105423586
LOC105424652	4447.55	1.84459	0.172986	10.6632	1.51325e-26	6.55629e-25	NW_011933573.1	963633	971582	-	myb-like protein D
LOC105432533	11.7621	1.84245	0.789538	2.33358	0.0196177	0.0402851	NW_011933763.1	2890872	2895679	+	uncharacterized LOC105432533
LOC105433819	4684.79	1.82592	0.157066	11.6252	3.06841e-31	1.91784e-29	NW_011933334.1	1667	2920	+	neutral ceramidase-like
LOC105430998	989.589	1.81753	0.116013	15.6666	2.5594e-55	5.42118e-53	NW_011933726.1	87087	93816	-	transmembrane protein 35A
LOC105431258	14.4193	1.81752	0.65168	2.78897	0.00528758	0.0126262	NW_011933734.1	523430	525765	-	protein lethal(3)malignant blood neoplasm 1, transcript variant X2
LOC105427806	905.331	1.81634	0.232539	7.81093	5.67653e-15	8.68024e-14	NW_011933671.1	362943	366035	+	aurora kinase B
LOC105422292	1585.18	1.81425	0.164445	11.0326	2.66023e-28	1.33455e-26	NW_011933378.1	137435	139110	-	cyclin-dependent kinases regulatory subunit
LOC105434090	13.2605	1.81257	0.641561	2.82525	0.00472437	0.0114413	NW_011933341.1	748690	756556	+	probable cytochrome P450 49a1
LOC105426187	489.373	1.8101	0.277287	6.52789	6.67017e-11	6.18763e-10	NW_011933621.1	287575	290520	+	phosphotriesterase-related protein, transcript variant X2
LOC105433437	969.915	1.80922	0.173081	10.453	1.41921e-25	5.77684e-24	NW_011933315.1	80390	85150	+	transcription termination factor 2
LOC105425319	74.3658	1.80718	0.394188	4.58457	4.54931e-06	2.09577e-05	NW_011933592.1	605387	609919	+	uncharacterized LOC105425319, transcript variant X2
LOC105427257	104.535	1.80525	0.357579	5.04852	4.45245e-07	2.40676e-06	NW_011933656.1	76476	79303	+	heat shock factor protein 2-like
LOC105430573	806.732	1.80454	0.175371	10.2899	7.82971e-25	2.99519e-23	NW_011933718.1	2882503	2883567	-	uncharacterized LOC105430573
LOC105433559	84.8831	1.80356	0.248249	7.26514	3.72641e-13	4.55371e-12	NW_011933323.1	381832	412335	-	pair-rule protein odd-paired
LOC105433791	188.043	1.80244	0.185188	9.73307	2.17908e-22	7.04077e-21	NW_011933333.1	88068	91680	+	nicotinamidase-like, transcript variant X1
LOC105431039	1208.1	1.8012	0.149808	12.0234	2.67824e-33	1.90271e-31	NW_011933727.1	611723	616253	+	protein brambleberry-like
LOC105433648	30.0598	1.79918	0.587463	3.06263	0.00219402	0.00583746	NW_011933328.1	40871	41277	-	histone H2B-like
LOC105425536	192.718	1.79864	0.215974	8.32802	8.2208e-17	1.54909e-15	NW_011933597.1	48192	61973	+	SEC14-like protein 2
LOC105431177	12.7249	1.79824	0.698729	2.57359	0.0100649	0.0222802	NW_011933732.1	679982	683536	+	cytochrome P450 4V2-like, transcript variant X1
LOC105431808	14.8716	1.79107	0.504332	3.55137	0.000383226	0.00120786	NW_011933748.1	2952048	2955985	-	uncharacterized LOC105431808, transcript variant X2
LOC105434282	32.5172	1.78701	0.366346	4.87794	1.072e-06	5.44955e-06	NW_011930930.1	374	1243	+	RNA-binding protein MEX3B
LOC105424574	475.24	1.78683	0.190943	9.35793	8.13107e-21	2.29072e-19	NW_011933571.1	582791	584401	+	15-hydroxyprostaglandin dehydrogenase [NAD(+)]-like
LOC105422479	1987.44	1.78581	0.170623	10.4664	1.2321e-25	5.03313e-24	NW_011933403.1	84584	95484	+	hyaluronan mediated motility receptor-like
LOC105425760	524.911	1.78025	0.231195	7.70019	1.35859e-14	1.97704e-13	NW_011933607.1	239015	246071	+	insulin-degrading enzyme-like
LOC105432839	184.166	1.77553	0.195055	9.10272	8.80934e-20	2.23914e-18	NW_011933766.1	776728	779872	-	uncharacterized LOC105432839
LOC105427800	2155.86	1.77284	0.117186	15.1284	1.0516e-51	1.90924e-49	NW_011933671.1	344233	348175	-	condensin complex subunit 2
LOC105423895	1825.99	1.77073	0.136902	12.9343	2.88344e-38	2.61752e-36	NW_011933534.1	630911	636972	+	uncharacterized LOC105423895, transcript variant X2
LOC105432283	1489.39	1.76987	0.11616	15.2364	2.02628e-52	3.92824e-50	NW_011933761.1	1823520	1838908	+	uncharacterized LOC105432283, transcript variant X1
LOC105430961	38299.6	1.76609	0.150959	11.6991	1.28769e-31	8.13737e-30	NW_011933725.1	2950405	2977507	-	alaserpin-like, transcript variant X4
LOC105429437	1906.65	1.76457	0.139472	12.6518	1.09343e-36	9.33328e-35	NW_011933704.1	299324	302314	+	interaptin-like
LOC105427038	33.4165	1.7596	0.465066	3.78356	0.0001546	0.000524723	NW_011933649.1	565526	600637	-	LON peptidase N-terminal domain and RING finger protein 3
LOC105431873	546.834	1.75901	0.154998	11.3486	7.53913e-30	4.20646e-28	NW_011933750.1	376673	378550	-	uncharacterized LOC105431873
LOC105432048	186.919	1.75665	0.292557	6.00445	1.91982e-09	1.46882e-08	NW_011933757.1	967738	970052	+	uncharacterized LOC105432048
LOC105433592	862.169	1.75644	0.133599	13.1471	1.76936e-39	1.72974e-37	NW_011933324.1	204725	206646	-	uncharacterized LOC105433592
LOC105423561	3973.1	1.75369	0.574618	3.05192	0.00227383	0.00602875	NW_011933501.1	69158	69953	-	uncharacterized LOC105423561
LOC105428655	170.251	1.75213	0.411842	4.25436	2.09643e-05	8.44629e-05	NW_011933693.1	1096250	1102820	+	probable cytochrome P450 12b2, mitochondrial
LOC105432164	10.7858	1.75178	0.716155	2.44609	0.0144416	0.0307374	NW_011933758.1	373060	375564	+	sodium/hydrogen exchanger 9B2-like
LOC105424685	796.191	1.74833	0.182472	9.58138	9.5754e-22	2.92063e-20	NW_011933574.1	192445	195568	+	separin, transcript variant X3
LOC105429849	385.31	1.73447	0.172567	10.051	9.09239e-24	3.19996e-22	NW_011933712.1	534431	537958	+	uncharacterized LOC105429849, transcript variant X4
LOC105422748	33.4514	1.73308	0.392634	4.41398	1.01489e-05	4.34767e-05	NW_011933418.1	105065	108213	+	inositol monophosphatase 2-like
LOC105429320	1081.62	1.72378	0.148725	11.5904	4.60754e-31	2.83339e-29	NW_011933701.1	174169	180524	+	uncharacterized LOC105429320, transcript variant X1
LOC105430429	595.967	1.72191	0.477531	3.60586	0.000311119	0.00100185	NW_011933718.1	1208921	1211158	+	neural/ectodermal development factor IMP-L2, transcript variant X1
LOC105427124	1830.47	1.72084	0.127384	13.5091	1.38203e-41	1.46367e-39	NW_011933651.1	782102	786602	+	isthmin-1-like
LOC105428236	1639.99	1.71191	0.155131	11.0352	2.58392e-28	1.30611e-26	NW_011933682.1	649535	652007	+	kinetochore protein NDC80 homolog
LOC105430213	10.0279	1.70812	0.60106	2.84185	0.00448523	0.0109293	NW_011933717.1	1049684	1051738	-	uncharacterized LOC105430213
LOC105423256	241.15	1.70782	0.305999	5.58115	2.38938e-08	1.57611e-07	NW_011933455.1	886505	889295	+	cytochrome b5-like, transcript variant X1
LOC105430860	11.7055	1.70539	0.575751	2.96203	0.00305616	0.00782022	NW_011933725.1	627129	627767	+	uncharacterized LOC105430860
LOC105432096	38.6271	1.69959	0.463639	3.66576	0.000246602	0.000807743	NW_011933758.1	505169	514067	+	putative fatty acyl-CoA reductase CG5065, transcript variant X1
LOC105434039	146.473	1.69912	0.314984	5.39429	6.8796e-08	4.19898e-07	NW_011933341.1	292749	294455	+	uncharacterized LOC105434039
LOC105425578	4226.63	1.69635	0.120316	14.0991	3.8454e-45	4.78083e-43	NW_011933598.1	343733	350314	-	pantothenate kinase 4, transcript variant X1
LOC105422665	4263.43	1.69561	0.150252	11.2851	1.5549e-29	8.50955e-28	NW_011933409.1	139	875	+	neutral ceramidase-like
LOC105427412	10.7077	1.69554	0.682541	2.48416	0.0129858	0.0279826	NW_011933667.1	280683	286695	-	glutamate receptor ionotropic, delta-2-like
LOC105434009	86.3308	1.6952	0.273349	6.20158	5.58991e-10	4.60313e-09	NW_011933339.1	600360	607882	-	transcriptional regulator ovo
LOC105425888	2300.09	1.6934	0.118837	14.2498	4.49506e-46	5.97843e-44	NW_011933613.1	29536	63917	-	glucose transporter type 1, transcript variant X18
LOC105424592	247.767	1.69089	0.245693	6.8821	5.89761e-12	6.24023e-11	NW_011933571.1	713567	758252	+	chondroitin sulfate proteoglycan 4, transcript variant X4
LOC105428102	2165.2	1.677	0.121396	13.8143	2.08929e-43	2.38973e-41	NW_011933679.1	6594	25911	+	facilitated trehalose transporter Tret1-like
LOC105432075	1274.35	1.67173	0.16935	9.87147	5.53495e-23	1.87304e-21	NW_011933758.1	147657	150089	+	uncharacterized LOC105432075
LOC105429937	252.405	1.67105	0.156953	10.6468	1.80432e-26	7.7586e-25	NW_011933713.1	384810	394750	+	probable RNA-binding protein 46, transcript variant X2
LOC105434166	173.572	1.67073	0.173971	9.60344	7.73166e-22	2.36456e-20	NW_011933344.1	362068	399532	-	protein apterous-like
LOC105431152	124.551	1.66848	0.358294	4.65674	3.21262e-06	1.51968e-05	NW_011933732.1	253556	318672	+	elongation of very long chain fatty acids protein AAEL008004-like, transcript variant X3
LOC105433617	5854.4	1.66505	0.214253	7.77142	7.76095e-15	1.16191e-13	NW_011933327.1	6016	9561	-	sphingomyelin phosphodiesterase-like, transcript variant X2
LOC105433705	29.331	1.66428	0.512727	3.24594	0.00117062	0.00336675	NW_011933330.1	214617	216017	-	uncharacterized LOC105433705
LOC105431153	964.14	1.66341	0.259764	6.40355	1.51809e-10	1.35338e-09	NW_011933732.1	257551	318444	-	elongation of very long chain fatty acids protein AAEL008004, transcript variant X1
LOC105429525	204.344	1.66248	0.213175	7.79868	6.25597e-15	9.51539e-14	NW_011933704.1	1459073	1459690	-	histone H2A-like
LOC105423583	135.114	1.65906	0.308622	5.3757	7.62854e-08	4.61668e-07	NW_011933502.1	171433	176793	-	tubulin polyglutamylase TTLL13-like
LOC105431214	980.65	1.64927	0.132005	12.494	8.04816e-36	6.3927e-34	NW_011933734.1	99850	102445	+	aurora kinase C-like, transcript variant X1
LOC105427728	197.975	1.64374	0.334823	4.90929	9.1408e-07	4.69899e-06	NW_011933670.1	705808	708781	-	uncharacterized LOC105427728
LOC105428275	4266.86	1.64149	0.152844	10.7397	6.62568e-27	2.96033e-25	NW_011933684.1	345	805	-	neutral ceramidase-like
LOC105427198	1605.98	1.63912	0.17335	9.45554	3.21355e-21	9.49784e-20	NW_011933653.1	526046	529970	-	diacylglycerol kinase epsilon
LOC105421964	277.962	1.639	0.189952	8.62848	6.2172e-18	1.2813e-16	NW_011933354.1	43207	66656	+	uncharacterized LOC105421964
LOC105428651	3279.79	1.6385	0.16182	10.1255	4.25969e-24	1.54184e-22	NW_011933693.1	1084135	1088700	-	disks large-associated protein 5
LOC105431088	756.024	1.6328	0.144029	11.3366	8.64149e-30	4.79812e-28	NW_011933728.1	648986	652865	-	condensin complex subunit 3
LOC105433263	3756.74	1.62686	0.136199	11.9447	6.91696e-33	4.76604e-31	NW_011933309.1	12954	24903	+	inositol-3-phosphate synthase 1-A, transcript variant X1
LOC105423358	1247.18	1.62234	0.140498	11.547	7.6419e-31	4.57634e-29	NW_011933463.1	213909	220819	+	PQ-loop repeat-containing protein 1, transcript variant X2
LOC105429435	67.5939	1.6216	0.362176	4.47738	7.55649e-06	3.32427e-05	NW_011933704.1	305833	316699	+	uncharacterized LOC105429435
LOC105426437	15.5448	1.62	0.54488	2.97314	0.00294773	0.00757325	NW_011933630.1	29772	33107	+	trypsin-1-like
LOC105428276	18733.3	1.61363	0.138687	11.635	2.73502e-31	1.71885e-29	NW_011933684.1	25948	36045	-	neutral ceramidase-like, transcript variant X2
LOC105433830	2087.93	1.60928	0.20139	7.99086	1.34006e-15	2.19279e-14	NW_011933336.1	17507	40742	-	solute carrier family 2, facilitated glucose transporter member 1-like, transcript variant X1
LOC105424849	460.657	1.60891	0.177545	9.06199	1.28097e-19	3.22015e-18	NW_011933577.1	677637	683430	+	carboxypeptidase M, transcript variant X2
LOC105433867	16.7606	1.6077	0.616531	2.60765	0.0091166	0.0203823	NW_011933337.1	6949	9241	+	gamma-aminobutyric acid receptor alpha-like, transcript variant X1
LOC105432446	310.518	1.60757	0.360709	4.4567	8.32293e-06	3.63905e-05	NW_011933763.1	2153518	2157238	-	peroxidasin homolog
LOC105422387	59.089	1.60208	0.33386	4.79866	1.5973e-06	7.87835e-06	NW_011933381.1	253537	256623	-	sarcoplasmic calcium-binding protein 1
LOC105422152	381.144	1.59791	0.26828	5.95614	2.58258e-09	1.94595e-08	NW_011933366.1	219847	231033	-	uncharacterized LOC105422152
LOC105424500	1191.62	1.59556	0.138196	11.5456	7.76713e-31	4.62711e-29	NW_011933571.1	130064	133174	+	cell division cycle protein 20 homolog
LOC105427707	1009.65	1.59426	0.13319	11.9698	5.11623e-33	3.56826e-31	NW_011933670.1	126025	129021	-	rac GTPase-activating protein 1-like
LOC105430371	65.1483	1.58859	0.465305	3.41408	0.000639978	0.00193499	NW_011933288.1	35496	38900	-	odorant receptor 4-like
LOC105427662	148.826	1.58575	0.217447	7.29258	3.04067e-13	3.75585e-12	NW_011933669.1	1954702	1957663	-	putative ammonium transporter 1
LOC105431108	2194.71	1.58299	0.193217	8.19281	2.55202e-16	4.49769e-15	NW_011933728.1	792346	800515	-	protein rolling stone-like, transcript variant X1
LOC105432380	125.615	1.57608	0.26587	5.92801	3.06635e-09	2.29085e-08	NW_011933763.1	876315	883147	-	prion-like-(Q/N-rich) domain-bearing protein 25, transcript variant X7
LOC105433698	1104.9	1.57217	0.266589	5.89735	3.69377e-09	2.72577e-08	NW_011933330.1	169717	172560	-	farnesol dehydrogenase-like
LOC105422781	28.9461	1.56951	0.523877	2.99595	0.00273588	0.00708627	NW_011933420.1	5596	9405	-	uncharacterized LOC105422781
LOC105426316	34.7458	1.55975	0.572784	2.7231	0.00646727	0.0151229	NW_011933624.1	179037	182166	-	ras-related protein Rab-8A
LOC105429681	289.222	1.55925	0.18073	8.62753	6.26894e-18	1.28964e-16	NW_011933708.1	458640	466992	+	cilia- and flagella-associated protein 52
LOC105427207	9.78834	1.55845	0.573286	2.71845	0.00655886	0.0153071	NW_011933653.1	719038	836302	+	POU domain protein 2-like, transcript variant X1
LOC105432865	36.815	1.55721	0.424295	3.67012	0.000242439	0.000795702	NW_011933766.1	1112321	1115059	-	fork head domain-containing protein crocodile
LOC105424338	5906.49	1.55678	0.337524	4.61235	3.98134e-06	1.85116e-05	NW_011933559.1	423627	430438	+	uncharacterized PE-PGRS family protein PE_PGRS46-like
LOC105424151	1667.68	1.55429	0.144956	10.7225	7.98172e-27	3.5249e-25	NW_011933551.1	272100	277397	-	serine/threonine-protein kinase mph1
LOC105428614	40.8414	1.54929	0.289335	5.35466	8.57188e-08	5.14403e-07	NW_011933693.1	34436	97960	+	5-hydroxytryptamine receptor 2A-like
LOC105423943	23.6276	1.53966	0.462101	3.33186	0.000862673	0.00254968	NW_011933538.1	36649	51605	-	osmotic avoidance abnormal protein 3-like
LOC105433782	181.204	1.53763	0.204147	7.53197	4.99788e-14	6.82168e-13	NW_011933333.1	16104	23026	+	NGFI-A-binding protein homolog
LOC105425876	46.7462	1.53212	0.437915	3.49868	0.000467575	0.00145211	NW_011933611.1	103512	203210	-	MAP/microtubule affinity-regulating kinase 3-like
LOC105422772	36.3446	1.53084	0.320155	4.78154	1.73956e-06	8.55055e-06	NW_011933418.1	333114	339714	+	protein drumstick, transcript variant X2
LOC105427076	413.094	1.52931	0.188997	8.09173	5.88228e-16	1.0042e-14	NW_011933651.1	115037	116486	-	uncharacterized LOC105427076
LOC105424729	1045.18	1.52627	0.151334	10.0854	6.40774e-24	2.28323e-22	NW_011933575.1	518160	521150	+	flap endonuclease GEN
LOC105422332	271.622	1.51886	0.137641	11.0349	2.59212e-28	1.30611e-26	NW_011933378.1	97075	108689	+	homeobox protein Meis2-like
LOC105425833	20.4407	1.51206	0.56616	2.67072	0.00756882	0.0173318	NW_011933611.1	145184	367059	+	uncharacterized LOC105425833
LOC105430911	657.915	1.50971	0.136729	11.0416	2.40599e-28	1.2231e-26	NW_011933725.1	1958224	1976919	+	protein FAM49B, transcript variant X2
LOC105426624	3548.73	1.5043	0.117477	12.8051	1.53528e-37	1.35081e-35	NW_011933635.1	114184	123487	+	anillin, transcript variant X4
LOC105422187	457.597	1.50402	0.320032	4.69961	2.60659e-06	1.2527e-05	NW_011933373.1	29623	32640	+	putative aldehyde dehydrogenase family 7 member A1 homolog
LOC105429764	210.772	1.50188	0.18692	8.03491	9.3649e-16	1.56831e-14	NW_011933709.1	1032639	1048155	-	uncharacterized LOC105429764, transcript variant X1
LOC105426604	92.1943	1.50156	0.265335	5.65911	1.52164e-08	1.03046e-07	NW_011933634.1	30311	44253	+	protein jim lovell, transcript variant X1
LOC105433070	221.032	1.49926	0.233121	6.43123	1.26573e-10	1.13817e-09	NW_011933767.1	1105420	1108809	-	uncharacterized LOC105433070
LOC105423089	249.07	1.49807	0.202518	7.39725	1.39035e-13	1.77812e-12	NW_011931669.1	11	1109	+	large neutral amino acids transporter small subunit 1-like
LOC105433760	37.6388	1.49251	0.403648	3.69754	0.000217695	0.000720902	NW_011933330.1	315015	320940	+	uncharacterized LOC105433760
LOC105432724	1828.14	1.48874	0.177486	8.38795	4.94673e-17	9.52536e-16	NW_011933765.1	730784	732533	-	mevalonate kinase-like
LOC105429068	58.8232	1.48859	0.373762	3.98272	6.81299e-05	0.000248333	NW_011933697.1	635065	643632	-	receptor-type tyrosine-protein phosphatase kappa-like
LOC105427386	936.175	1.48234	0.153757	9.64075	5.3796e-22	1.67662e-20	NW_011933666.1	110429	113820	-	HAUS augmin-like complex subunit 3
LOC105426362	1069.02	1.48048	0.0980823	15.0943	1.76536e-51	3.15503e-49	NW_011933624.1	697209	701773	-	diphthine methyltransferase, transcript variant X1
LOC105425553	362.049	1.47972	0.18736	7.89771	2.84085e-15	4.49428e-14	NW_011933598.1	54591	63565	+	prostatic acid phosphatase-like
LOC105428700	1320.41	1.47412	0.155158	9.50077	2.08343e-21	6.222e-20	NW_011933693.1	1437742	1438819	-	borealin-like
LOC105431710	359.075	1.46948	0.232114	6.33087	2.43778e-10	2.11499e-09	NW_011933748.1	745671	751195	-	retinol dehydrogenase 12-like, transcript variant X2
Trnaa-ggc_1	49.8506	1.46883	0.491979	2.98555	0.00283067	0.00730862	NW_011933767.1	1287248	1287320	+	tRNA-Ala
LOC105426319	573.828	1.46845	0.15171	9.67931	3.69203e-22	1.16979e-20	NW_011933624.1	224308	236311	+	protein gooseberry-like, transcript variant X1
LOC105430268	57.9641	1.4684	0.273956	5.36001	8.32181e-08	5.00446e-07	NW_011933717.1	2099873	2265537	+	discoidin domain-containing receptor 2, transcript variant X1
LOC105426861	12924.2	1.46624	0.185279	7.91366	2.49929e-15	3.98701e-14	NW_011933232.1	162905	173317	-	murinoglobulin-1-like
LOC105431449	846.332	1.45978	0.135883	10.7429	6.40062e-27	2.89369e-25	NW_011933743.1	515200	518732	-	pachytene checkpoint protein 2 homolog, transcript variant X2
LOC105427653	355.421	1.4545	0.241477	6.02334	1.70852e-09	1.31685e-08	NW_011933669.1	1384632	1416090	-	netrin receptor UNC5C-like, transcript variant X2
LOC105426123	2540.56	1.45417	0.174513	8.33277	7.89743e-17	1.49307e-15	NW_011933618.1	266087	271194	+	kinesin-like protein KIF23
LOC105428084	2612.94	1.45294	0.0951217	15.2746	1.12994e-52	2.22832e-50	NW_011933678.1	572212	576718	-	cyclin-A2, transcript variant X2
LOC105434367	1931.41	1.44743	0.103181	14.0281	1.04945e-44	1.23748e-42	NW_011933354.1	1156352	1160366	-	uncharacterized LOC105434367
LOC105426276	64.8891	1.44493	0.304272	4.74881	2.04622e-06	9.96792e-06	NW_011933622.1	171999	184334	-	uncharacterized LOC105426276
LOC105426050	60.6026	1.43939	0.315923	4.55612	5.21066e-06	2.37354e-05	NW_011933217.1	167341	171491	+	F-box only protein 39-like
LOC105429185	3633.43	1.43897	0.130084	11.0618	1.92122e-28	9.81023e-27	NW_011933266.1	56269	62715	+	kinesin-like protein KIF20A
LOC105423559	27.3037	1.43754	0.512828	2.80315	0.00506054	0.0121474	NW_011933501.1	58178	61618	-	probable DNA double-strand break repair Rad50 ATPase
LOC105423842	27.4065	1.43023	0.402641	3.55213	0.00038212	0.00120471	NW_011933534.1	15871	16935	-	uncharacterized LOC105423842
LOC105423734	1067.05	1.42878	0.138837	10.2911	7.72781e-25	2.96613e-23	NW_011933512.1	296600	298141	+	uncharacterized LOC105423734
LOC105424220	841.539	1.42322	0.200892	7.08451	1.3954e-12	1.59606e-11	NW_011933555.1	422566	423276	-	histone H2B
LOC105431920	2426.31	1.42299	0.143163	9.93968	2.79722e-23	9.60799e-22	NW_011933754.1	360486	368445	-	probable allantoicase, transcript variant X1
LOC105432099	78.2303	1.404	0.328114	4.279	1.87736e-05	7.62814e-05	NW_011933758.1	519249	531068	+	putative fatty acyl-CoA reductase CG5065
LOC105423030	113.754	1.40238	0.254767	5.50456	3.70094e-08	2.36356e-07	NW_011933433.1	21740	23280	-	uncharacterized LOC105423030
LOC105427373	24.2858	1.39579	0.479395	2.91156	0.0035963	0.00899602	NW_011933665.1	213947	217339	-	glutamate receptor ionotropic, kainate 2-like
LOC105431636	1605.86	1.39333	0.114043	12.2176	2.5034e-34	1.8453e-32	NW_011933746.1	407251	412204	-	TPPP family protein CG45057, transcript variant X2
LOC105434150	212.505	1.39269	0.257302	5.41268	6.20879e-08	3.80579e-07	NW_011933341.1	240622	241970	-	histone H3-like centromeric protein hH3v
LOC105425849	1393.67	1.3895	0.126665	10.9699	5.33306e-28	2.58473e-26	NW_011933611.1	521876	567899	-	queuosine salvage protein-like, transcript variant X2
LOC105427022	6478.43	1.38687	0.117252	11.8281	2.79421e-32	1.81592e-30	NW_011933649.1	386796	393677	+	gem-associated protein 5
LOC105426386	275.34	1.3866	0.258854	5.35667	8.47674e-08	5.09228e-07	NW_011933624.1	833072	848869	-	uncharacterized LOC105426386, transcript variant X2
LOC105430194	1822.06	1.37881	0.146074	9.43914	3.75859e-21	1.09391e-19	NW_011933717.1	916143	920726	-	transcriptional protein SWT1, transcript variant X1
LOC105427001	183.833	1.37879	0.254569	5.41616	6.08941e-08	3.73662e-07	NW_011933649.1	230130	235709	+	uncharacterized LOC105427001, transcript variant X2
LOC105429233	200.772	1.37726	0.2028	6.79124	1.11171e-11	1.14248e-10	NW_011933266.1	82586	83571	-	uncharacterized LOC105429233
LOC105427783	375.921	1.37687	0.224237	6.14023	8.24038e-10	6.63757e-09	NW_011933671.1	44145	190714	+	segmentation polarity homeobox protein engrailed-like, transcript variant X3
LOC105432492	32.6425	1.37333	0.564154	2.43433	0.0149196	0.0316546	NW_011933763.1	3251925	3256147	-	uncharacterized LOC105432492, transcript variant X2
LOC105431514	16.2051	1.37296	0.490433	2.79949	0.00511832	0.0122655	NW_011933744.1	291652	295832	-	uncharacterized LOC105431514
LOC105429205	710.073	1.37042	0.241318	5.6789	1.35565e-08	9.25174e-08	NW_011933699.1	702275	711386	+	venom carboxylesterase-6
LOC105430350	279.693	1.36942	0.175529	7.80169	6.10847e-15	9.30342e-14	NW_011933718.1	527306	532971	+	serine protease persephone-like, transcript variant X1
LOC105428157	4828.8	1.36619	0.178947	7.63457	2.26568e-14	3.21125e-13	NW_011933681.1	458155	462496	-	fructose-1,6-bisphosphatase 1
LOC105433275	16.5327	1.364	0.478662	2.84962	0.0043772	0.010698	NW_011933309.1	107066	108802	-	protein phosphatase 1 regulatory subunit 42-like
LOC105433484	74.4308	1.36107	0.35127	3.87471	0.00010675	0.000374886	NW_011933318.1	101157	116995	+	chondroadherin, transcript variant X1
LOC105433678	245.985	1.35966	0.350128	3.88334	0.000103033	0.000363397	NW_011933328.1	278469	282740	+	glucose dehydrogenase [FAD, quinone]
LOC105430112	679.602	1.35881	0.202412	6.71311	1.90515e-11	1.88831e-10	NW_011933716.1	1595538	1606323	-	carbohydrate sulfotransferase 11-like
LOC105426184	101.533	1.35877	0.298652	4.54968	5.37266e-06	2.4415e-05	NW_011933621.1	283694	287117	+	ras-related protein Rab-32-like
LOC105426112	335.062	1.35152	0.185271	7.29486	2.98971e-13	3.70089e-12	NW_011933618.1	155770	162722	-	kinesin-like protein KIF19
LOC105424485	13.3203	1.34965	0.581015	2.32292	0.0201837	0.0412915	NW_011932904.1	86	852	+	uncharacterized LOC105424485
LOC105426885	2120.49	1.34743	0.128016	10.5255	6.59345e-26	2.7226e-24	NW_011933643.1	472158	475851	+	dnaJ homolog subfamily C member 22
LOC105431725	19.1773	1.34324	0.47711	2.81538	0.00487203	0.0117516	NW_011933748.1	1002506	1004028	+	uncharacterized LOC105431725
LOC105430364	12.4306	1.34164	0.556034	2.41288	0.0158272	0.0333452	NW_011933718.1	675530	676865	-	uncharacterized LOC105430364
LOC105426410	3392.34	1.3387	0.120345	11.1239	9.60166e-29	4.99361e-27	NW_011933625.1	81894	89439	-	serine/threonine-protein kinase polo-like
LOC105429428	719.869	1.3368	0.149413	8.94703	3.65159e-19	8.64738e-18	NW_011933704.1	332400	333849	-	uncharacterized LOC105429428
LOC105427681	35.1273	1.33533	0.424158	3.14818	0.00164289	0.00453459	NW_011933669.1	732798	746918	-	uncharacterized LOC105427681
LOC105432916	672.218	1.33217	0.154817	8.60478	7.64631e-18	1.56176e-16	NW_011933766.1	1651645	1652938	-	uncharacterized LOC105432916, transcript variant X2
LOC105424224	314.589	1.33115	0.150956	8.81813	1.16392e-18	2.61551e-17	NW_011933555.1	429580	430077	+	histone H3
LOC105431450	757.54	1.32852	0.302104	4.39754	1.09483e-05	4.6674e-05	NW_011933743.1	504696	515020	+	hemicentin-2-like
LOC105425645	27.7595	1.32552	0.376468	3.52095	0.000430009	0.00134274	NW_011933600.1	846693	849920	-	EF-hand domain-containing protein 1-like
LOC105431030	1956.45	1.3211	0.179171	7.37339	1.66337e-13	2.1046e-12	NW_011933727.1	342564	372613	+	elongation of very long chain fatty acids protein AAEL008004-like, transcript variant X4
LOC105423908	879.539	1.31702	0.0919655	14.3208	1.62342e-46	2.29243e-44	NW_011933534.1	815322	899924	-	diacylglycerol kinase 1, transcript variant X3
LOC105428463	437.561	1.31229	0.334839	3.91918	8.88523e-05	0.00031779	NW_011933686.1	597497	602310	+	glycine dehydrogenase (decarboxylating), mitochondrial
LOC105430148	257.729	1.31025	0.211607	6.19189	5.94467e-10	4.88822e-09	NW_011933717.1	171277	173537	-	lactosylceramide 4-alpha-galactosyltransferase-like
LOC105423677	21.957	1.30939	0.443391	2.95312	0.00314581	0.00801083	NW_011933507.1	714	2202	+	myosin-VIIa-like
LOC105431080	107.931	1.30856	0.297237	4.40243	1.07047e-05	4.57036e-05	NW_011933728.1	533209	534652	-	uncharacterized LOC105431080
LOC105426614	888.694	1.30813	0.137465	9.51604	1.79898e-21	5.42923e-20	NW_011933635.1	20527	24897	+	probable methyltransferase TARBP1, transcript variant X1
LOC105431076	91.6504	1.30741	0.232656	5.61951	1.91496e-08	1.28164e-07	NW_011933728.1	295551	331138	+	octopamine receptor beta-2R-like, transcript variant X2
LOC105434147	641.719	1.30408	0.143894	9.06276	1.27188e-19	3.20435e-18	NW_011933341.1	1103869	1154112	-	DNA N6-methyl adenine demethylase
LOC105425658	4175.75	1.29872	0.0922973	14.071	5.72242e-45	7.03796e-43	NW_011933602.1	94560	97641	+	zinc finger protein 346-like, transcript variant X1
LOC105424409	929.233	1.29797	0.148038	8.76783	1.8215e-18	3.99126e-17	NW_011933563.1	615116	618816	-	maternal embryonic leucine zipper kinase-like
LOC105427906	4897.21	1.29479	0.55106	2.34964	0.0187914	0.0387451	NW_011933674.1	365087	366505	+	chymotrypsin inhibitor
LOC105431976	2333.33	1.29396	0.134266	9.63732	5.56233e-22	1.72886e-20	NW_011933757.1	438466	440460	-	uncharacterized LOC105431976
LOC105429820	65.7146	1.28963	0.337669	3.81922	0.000133874	0.000461906	NW_011933711.1	295080	304709	-	probable phospholipid-transporting ATPase IF
LOC105430065	4032.1	1.28853	0.105151	12.2541	1.59701e-34	1.19323e-32	NW_011933716.1	945969	954363	+	cysteine and histidine-rich protein 1 homolog, transcript variant X2
LOC105433601	388.428	1.28464	0.16123	7.96777	1.6156e-15	2.62117e-14	NW_011933324.1	289599	293782	-	uncharacterized LOC105433601
LOC105423701	55.5111	1.28376	0.341275	3.76167	0.000168783	0.000568811	NW_011933510.1	1950	3446	+	transmembrane protein 17-like
LOC105431421	1565.4	1.28128	0.176886	7.24355	4.37095e-13	5.31296e-12	NW_011933742.1	139541	143369	-	tudor and KH domain-containing protein homolog
LOC112552999	326.833	1.28123	0.150207	8.52978	1.46625e-17	2.90154e-16	NW_011933765.1	449574	461877	-	WD repeat-containing protein 78, transcript variant X2
LOC105427259	1399.77	1.28119	0.142946	8.96275	3.16688e-19	7.62585e-18	NW_011933238.1	176646	178173	+	uncharacterized LOC105427259
LOC105429365	1641.27	1.28101	0.101755	12.5892	2.42175e-36	2.00725e-34	NW_011933702.1	1078173	1080259	-	protein nessun dorma
LOC105424668	2560.67	1.27884	0.135519	9.43659	3.85109e-21	1.11799e-19	NW_011933148.1	2301	10593	-	aminopeptidase N-like
LOC105424831	2009.17	1.27681	0.12684	10.0662	7.78934e-24	2.76691e-22	NW_011933577.1	509287	511005	+	protein FAM192A, transcript variant X1
LOC105424300	319.362	1.2707	0.283742	4.47838	7.52126e-06	3.31132e-05	NW_011932602.1	243	1792	-	glucose dehydrogenase [FAD, quinone]-like
LOC105426464	934.249	1.27037	0.144557	8.78797	1.5228e-18	3.37554e-17	NW_011933631.1	197954	202470	+	dehydrogenase/reductase SDR family member 7
LOC105431528	613.853	1.27009	0.199477	6.3671	1.92639e-10	1.69232e-09	NW_011933744.1	500995	505289	+	murinoglobulin-1-like, transcript variant X3
LOC105433218	99.3018	1.26151	0.215518	5.85339	4.81665e-09	3.50687e-08	NW_011934007.1	242	1607	+	uncharacterized LOC105433218
LOC105425431	626.076	1.25998	0.159937	7.87801	3.32628e-15	5.23328e-14	NW_011933594.1	244742	256664	-	synaptotagmin-14, transcript variant X2
LOC105430399	1314.35	1.25971	0.0945429	13.3242	1.67436e-40	1.70994e-38	NW_011933718.1	1057571	1070368	-	BTB/POZ domain-containing protein 6-B, transcript variant X2
LOC105422013	59.2941	1.25597	0.387923	3.23768	0.00120504	0.00345272	NW_011933355.1	868957	873774	-	meckelin
LOC105433058	2094.54	1.25468	0.0742372	16.901	4.42141e-64	1.58038e-61	NW_011933767.1	1501444	1504923	+	protein lin-9 homolog
LOC105430772	63.6605	1.25188	0.287007	4.36184	1.28976e-05	5.42761e-05	NW_011933723.1	514866	517135	+	methylenetetrahydrofolate reductase
LOC105422463	88.5031	1.2508	0.475603	2.62992	0.0085406	0.0192791	NW_011933401.1	20322	31458	-	uncharacterized LOC105422463
LOC105425470	170.975	1.25027	0.196525	6.3619	1.99272e-10	1.74657e-09	NW_011933594.1	759592	772299	-	nucleoredoxin-like
LOC105431629	143.622	1.24857	0.485324	2.57265	0.0100922	0.0223277	NW_011933746.1	352408	353243	+	general odorant-binding protein 56d-like
LOC105434274	588.382	1.24825	0.137062	9.10721	8.45257e-20	2.15805e-18	NW_011933353.1	8603	10876	-	RNA pseudouridylate synthase domain-containing protein 1-like, transcript variant X2
LOC105423450	481.212	1.24816	0.120344	10.3716	3.33818e-25	1.32118e-23	NW_011933469.1	112502	115600	-	tetraspanin-7-like
LOC105426759	177.184	1.24766	0.178537	6.98826	2.78325e-12	3.06104e-11	NW_011933637.1	461395	467983	+	uncharacterized LOC105426759, transcript variant X2
LOC112552571	120.511	1.24307	0.205806	6.04	1.54113e-09	1.19589e-08	NW_011933635.1	18808	21238	+	uncharacterized LOC112552571
LOC105431902	1925.22	1.24287	0.1485	8.36954	5.78459e-17	1.10642e-15	NW_011933754.1	145227	149379	-	phosphoribosyl pyrophosphate synthase-associated protein 2
LOC105424149	293.305	1.24229	0.203181	6.11418	9.70576e-10	7.73082e-09	NW_011933551.1	245967	250520	+	60 kDa SS-A/Ro ribonucleoprotein-like, transcript variant X1
LOC105433374	683.152	1.24016	0.117913	10.5176	7.1687e-26	2.94948e-24	NW_011933313.1	100410	101898	-	uncharacterized LOC105433374
LOC105428565	77.5711	1.22686	0.508882	2.41089	0.0159136	0.0335026	NW_011933689.1	42454	49597	+	uncharacterized LOC105428565, transcript variant X2
LOC105430315	53.8448	1.22276	0.276914	4.41568	1.00693e-05	4.32004e-05	NW_011933718.1	68388	76709	+	intraflagellar transport protein 172 homolog
LOC105426145	793.266	1.2207	0.173741	7.02597	2.12577e-12	2.37973e-11	NW_011933619.1	196088	198520	+	protein-glutamate O-methyltransferase-like
LOC105429381	224.237	1.22035	0.169786	7.18755	6.5963e-13	7.90036e-12	NW_011933702.1	1155058	1157622	-	RNA polymerase II-associated protein 1-like
LOC112553072	18.9968	1.21947	0.424147	2.87512	0.00403873	0.00996012	NW_011933330.1	44812	45766	-	dual oxidase-like
LOC105427969	54.9227	1.21912	0.465398	2.61952	0.00880542	0.0197677	NW_011933674.1	305237	333818	+	dynein beta chain, ciliary-like
LOC105423829	148.005	1.21821	0.231032	5.2729	1.34282e-07	7.8164e-07	NW_011933531.1	48399	49081	-	DNA polymerase alpha catalytic subunit-like
LOC105432221	105.639	1.21543	0.288011	4.22008	2.44221e-05	9.72971e-05	NW_011933760.1	368446	381182	+	putative thiamine transporter SLC35F3
LOC105433466	459.459	1.21525	0.199854	6.08067	1.19683e-09	9.41498e-09	NW_011933316.1	78880	80040	-	uncharacterized LOC105433466
LOC105431178	677.684	1.21039	0.152701	7.92658	2.25257e-15	3.61866e-14	NW_011933732.1	688047	690526	-	leucine-rich repeat protein 1
LOC105422553	710.639	1.20362	0.100514	11.9746	4.82575e-33	3.38631e-31	NW_011933404.1	1123271	1126919	-	probable serine/threonine-protein kinase ifkC, transcript variant X3
LOC105423750	174.89	1.19738	0.179582	6.66762	2.59978e-11	2.54374e-10	NW_011933512.1	206620	207687	+	DNA replication complex GINS protein PSF3
LOC105425917	1287.9	1.19304	0.246409	4.8417	1.28736e-06	6.44878e-06	NW_011933613.1	340044	354652	-	cryptochrome-1-like
LOC105432952	52.446	1.19095	0.404997	2.94064	0.00327538	0.00827929	NW_011933766.1	694575	701755	+	pituitary homeobox homolog Ptx1
LOC105427645	30.7601	1.19023	0.402917	2.95404	0.00313643	0.00799343	NW_011933669.1	1179728	1184035	-	uncharacterized LOC105427645
LOC105425390	77.0186	1.18824	0.267632	4.43982	9.00344e-06	3.90821e-05	NW_011933593.1	455636	464268	-	probable G-protein coupled receptor Mth-like 3, transcript variant X2
LOC112552458	32.2843	1.18816	0.3653	3.25255	0.00114374	0.00329689	NW_011933577.1	639172	640079	+	uncharacterized LOC112552458
LOC105422811	37.8557	1.18177	0.44513	2.65487	0.0079338	0.0180627	NW_011931490.1	611	1128	+	uncharacterized LOC105422811
LOC105429051	214.543	1.18005	0.191913	6.14887	7.80379e-10	6.30365e-09	NW_011933697.1	485962	487407	+	uncharacterized LOC105429051
LOC105424148	1269.81	1.17962	0.155979	7.56271	3.94769e-14	5.43365e-13	NW_011933551.1	232629	237525	-	protein charybde-like
LOC105434077	2119.53	1.17912	0.145093	8.1267	4.41131e-16	7.66816e-15	NW_011933341.1	685103	692004	-	abnormal spindle-like microcephaly-associated protein homolog
LOC112553013	610.634	1.17326	0.155887	7.52634	5.21843e-14	7.08889e-13	NW_011933767.1	1102333	1104514	-	7-methylguanosine phosphate-specific 5'-nucleotidase
LOC105434058	16.8322	1.17248	0.504989	2.3218	0.020244	0.0414001	NW_011933341.1	569911	576109	-	uncharacterized LOC105434058, transcript variant X1
LOC105432610	3520.68	1.17106	0.163361	7.16857	7.57878e-13	9.02041e-12	NW_011933764.1	1989754	1998847	-	fatty acyl-CoA reductase 2-like
LOC105428995	61.4669	1.17079	0.417389	2.80502	0.00503133	0.01209	NW_011933263.1	17783	20127	-	uncharacterized LOC105428995
LOC105425870	1590.45	1.16998	0.105506	11.0892	1.41576e-28	7.32735e-27	NW_011933214.1	99319	101736	-	afadin- and alpha-actinin-binding protein-like
LOC105429123	251.584	1.16867	0.211539	5.52461	3.30215e-08	2.12429e-07	NW_011933698.1	8413	17351	+	proton-coupled amino acid transporter-like protein CG1139
LOC105431892	1074.92	1.16867	0.123872	9.43449	3.92912e-21	1.13775e-19	NW_011933754.1	64929	67268	+	glyoxylate reductase/hydroxypyruvate reductase
LOC105427095	78.186	1.16716	0.340818	3.42458	0.000615747	0.00186963	NW_011933651.1	521536	540869	-	NACHT and WD repeat domain-containing protein 2
LOC105424497	789.309	1.16675	0.118086	9.8805	5.05795e-23	1.7167e-21	NW_011933571.1	112427	118084	+	dual specificity protein phosphatase CDC14A-like, transcript variant X2
LOC112552263	87.564	1.1667	0.261194	4.4668	7.93989e-06	3.4849e-05	NW_011933397.1	10611	12823	+	uncharacterized LOC112552263
LOC105431818	115.29	1.1659	0.235757	4.94536	7.60018e-07	3.96582e-06	NW_011933748.1	3155485	3204205	+	homeobox protein homothorax-like
LOC105433276	764.272	1.16481	0.129864	8.9694	2.98132e-19	7.19415e-18	NW_011933309.1	108839	118205	-	kinetochore-associated protein 1
LOC105433024	465.178	1.16324	0.148981	7.80796	5.81205e-15	8.8756e-14	NW_011933767.1	1099821	1101949	-	protein SAAL1, transcript variant X1
LOC105430909	181.24	1.16129	0.374427	3.1015	0.0019254	0.00520017	NW_011933725.1	1845013	1870554	+	protein PFC0760c, transcript variant X1
LOC105423703	261.096	1.15964	0.179367	6.46518	1.01176e-10	9.19181e-10	NW_011933510.1	10904	19164	-	putative zinc metalloproteinase YIL108W
LOC105427631	29.7979	1.15891	0.503056	2.30374	0.0212374	0.0431999	NW_011933669.1	1122197	1131459	-	pollen-specific leucine-rich repeat extensin-like protein 2
LOC105426006	677.92	1.15814	0.130639	8.86521	7.63608e-19	1.75347e-17	NW_011933614.1	597387	607709	-	DNA ligase 3
LOC105423533	2499.06	1.15793	0.105529	10.9727	5.17282e-28	2.51773e-26	NW_011933497.1	24493	128852	-	uncharacterized LOC105423533, transcript variant X2
Trab	928.273	1.1579	0.224109	5.16669	2.38279e-07	1.33796e-06	NW_011933647.1	227728	236089	-	transformer homolog B
LOC105422846	559.109	1.15729	0.115022	10.0615	8.17631e-24	2.89537e-22	NW_011933420.1	777740	779699	+	uncharacterized LOC105422846, transcript variant X1
LOC105426017	1105.76	1.15721	0.147291	7.85659	3.94717e-15	6.1342e-14	NW_011933614.1	696796	699234	-	cell division control protein 6 homolog
LOC105427888	1955.15	1.15607	0.0715535	16.1567	1.01831e-58	2.53205e-56	NW_011933673.1	278468	281187	+	rho guanine nucleotide exchange factor 3-like
LOC105426680	74.2705	1.15429	0.36412	3.17009	0.00152392	0.00424411	NW_011933635.1	653158	662503	+	glutathione hydrolase 1 proenzyme-like
LOC105426998	448.654	1.15363	0.177863	6.48606	8.81108e-11	8.08837e-10	NW_011933649.1	213422	215286	+	spindle and kinetochore-associated protein 1-like, transcript variant X1
LOC105430033	137.71	1.1536	0.262279	4.39836	1.09072e-05	4.65335e-05	NW_011933716.1	725755	727870	-	uncharacterized LOC105430033
LOC105427180	6942.72	1.15308	0.144166	7.99828	1.26167e-15	2.08239e-14	NW_011933238.1	112062	141476	-	glutamine synthetase 2 cytoplasmic, transcript variant X2
LOC105434261	1800.97	1.15207	0.132953	8.66526	4.50466e-18	9.50633e-17	NW_011930915.1	87661	97306	-	NF-kappa-B inhibitor cactus-like
LOC112552457	56.1881	1.15141	0.299813	3.84043	0.000122819	0.000427381	NW_011933577.1	637550	638271	+	uncharacterized LOC112552457
LOC105433787	840.648	1.15103	0.138015	8.33986	7.4379e-17	1.41086e-15	NW_011933333.1	72121	73761	-	DNA polymerase beta-like
LOC105424025	17.7234	1.15027	0.474659	2.42337	0.0153774	0.0325039	NW_011933543.1	633760	636456	-	uncharacterized LOC105424025
LOC105429259	2139.18	1.14979	0.0839073	13.7031	9.72289e-43	1.07971e-40	NW_011933699.1	1694961	1698193	+	E3 ubiquitin-protein ligase Hakai-like, transcript variant X2
LOC105427608	1175.59	1.14888	0.116709	9.84398	7.27711e-23	2.43379e-21	NW_011933669.1	967572	972216	-	lysosomal Pro-X carboxypeptidase
LOC105430401	14824.1	1.14888	0.160855	7.14234	9.1755e-13	1.08307e-11	NW_011933718.1	1082740	1092022	+	interaptin
LOC105425722	1351.41	1.14748	0.131204	8.74578	2.21474e-18	4.80686e-17	NW_011933605.1	1154319	1158123	-	uncharacterized LOC105425722
LOC105428830	611.571	1.14721	0.146168	7.84861	4.20666e-15	6.51093e-14	NW_011933695.1	909174	924749	+	ras-related protein Rab-32, transcript variant X3
LOC105428831	538.041	1.14474	0.17748	6.44998	1.11865e-10	1.01308e-09	NW_011933695.1	932218	935447	+	uncharacterized LOC105428831, transcript variant X2
LOC105424462	3219.47	1.14287	0.165674	6.89832	5.26225e-12	5.58345e-11	NW_011933568.1	441195	464661	+	probable serine/threonine-protein kinase DDB_G0271682
LOC105422636	18.9806	1.14148	0.491732	2.32135	0.0202681	0.0414346	NW_011933407.1	230443	238505	-	short transient receptor potential channel 6-like
LOC105433788	996.378	1.13667	0.142269	7.98954	1.35446e-15	2.21319e-14	NW_011933333.1	80342	84829	+	HD domain-containing protein 2, transcript variant X1
LOC105424964	47.1098	1.1324	0.485402	2.33291	0.0196531	0.0403312	NW_011929523.1	5	729	-	histone H1.3-like
LOC105427723	101.955	1.13018	0.2211	5.11162	3.19401e-07	1.769e-06	NW_011933670.1	633434	656321	+	transcription factor hamlet-like
LOC105432662	300.675	1.12926	0.239743	4.7103	2.47355e-06	1.19327e-05	NW_011933765.1	120566	129414	+	uncharacterized LOC105432662, transcript variant X1
LOC105434277	560.704	1.12669	0.111134	10.1381	3.74122e-24	1.35848e-22	NW_011933353.1	624	4525	-	dystrophin-like
LOC105428185	3596.67	1.12646	0.0985448	11.4309	2.92916e-30	1.68361e-28	NW_011933681.1	744234	751424	-	unconventional myosin-XIX-like
LOC112552886	45.4172	1.12622	0.316966	3.55311	0.0003807	0.00120123	NW_011933725.1	750688	785019	+	uncharacterized LOC112552886
LOC105424405	1146.27	1.12618	0.119269	9.44233	3.64569e-21	1.06648e-19	NW_011933563.1	443854	449651	+	cysteine-rich protein 1-like
LOC105426502	386.037	1.12546	0.14807	7.60088	2.94133e-14	4.10279e-13	NW_011933632.1	97927	103419	+	ras-related protein Rab-23
LOC105432126	39.998	1.1244	0.391131	2.87474	0.00404359	0.0099678	NW_011933758.1	749294	751062	+	uncharacterized LOC105432126
LOC105425979	64.6809	1.12388	0.341145	3.29442	0.000986235	0.00288431	NW_011933614.1	414179	431731	+	uncharacterized LOC105425979
LOC105431041	216.545	1.12304	0.230593	4.87022	1.11473e-06	5.64673e-06	NW_011933727.1	643056	647877	+	uncharacterized LOC105431041
LOC105426578	2024.81	1.11866	0.126188	8.86501	7.64979e-19	1.75347e-17	NW_011933632.1	598272	608967	-	myosin-VIIa
LOC105432116	2136.87	1.11706	0.113247	9.86397	5.9643e-23	2.01238e-21	NW_011933758.1	618289	629832	-	GTPase-activating protein CdGAPr, transcript variant X4
LOC105423728	61.8127	1.11633	0.420838	2.65263	0.00798675	0.0181599	NW_011933512.1	267050	279640	+	flavin-containing monooxygenase FMO GS-OX-like 3, transcript variant X3
LOC105431128	36.0694	1.11308	0.310823	3.58107	0.000342196	0.00109117	NW_011933728.1	760755	763359	-	uncharacterized LOC105431128
LOC105426365	145.899	1.11135	0.284806	3.90211	9.53566e-05	0.000338934	NW_011933624.1	707876	708778	+	uncharacterized LOC105426365
LOC105432294	1610.22	1.10537	0.235675	4.69021	2.72918e-06	1.30613e-05	NW_011933761.1	1865411	1879971	-	laccase-1-like, transcript variant X2
LOC105428285	10791.7	1.10462	0.356741	3.09644	0.00195862	0.00528116	NW_011933684.1	193539	195642	+	uncharacterized LOC105428285
LOC105425093	16010.8	1.10404	0.144537	7.63847	2.19817e-14	3.11944e-13	NW_011933586.1	72078	76663	+	chitinase-like protein Idgf4, transcript variant X1
LOC105429386	144.331	1.10376	0.245197	4.50151	6.74715e-06	3.00054e-05	NW_011933702.1	1146703	1148057	-	uncharacterized LOC105429386
LOC105422613	894.635	1.1036	0.124522	8.86269	7.81096e-19	1.78327e-17	NW_011933406.1	968542	995061	+	nuclear pore complex protein Nup88
LOC105424717	9027.27	1.1033	0.112231	9.83061	8.31137e-23	2.73964e-21	NW_011933575.1	352948	355604	+	uncharacterized LOC105424717
LOC105430103	269.282	1.10277	0.175989	6.26614	3.70106e-10	3.13576e-09	NW_011933716.1	1474726	1529374	+	disintegrin and metalloproteinase domain-containing protein 10, transcript variant X1
LOC105428138	888.88	1.10155	0.16647	6.61712	3.66262e-11	3.52635e-10	NW_011933681.1	296997	298839	+	nucleoporin NUP35
LOC105425742	1934.2	1.10124	0.102985	10.6933	1.09447e-26	4.79639e-25	NW_011933605.1	1656113	1665605	+	LIM/homeobox protein Awh-like
LOC105422532	2038.4	1.09878	0.105921	10.3736	3.27e-25	1.29869e-23	NW_011933404.1	895750	901206	-	uncharacterized LOC105422532
LOC105427482	374.394	1.09785	0.254224	4.31842	1.57153e-05	6.49392e-05	NW_011933667.1	1604156	1629184	+	carcinine transporter-like, transcript variant X5
LOC105424471	223.002	1.09766	0.173743	6.31774	2.65408e-10	2.29459e-09	NW_011933568.1	627169	797199	+	hypoxia-inducible factor 1-alpha-like
LOC105432625	1944.4	1.09682	0.12528	8.75499	2.04127e-18	4.44725e-17	NW_011933764.1	262058	266380	+	modular serine protease-like
LOC105431727	1383.29	1.09567	0.0923544	11.8638	1.82473e-32	1.22772e-30	NW_011933748.1	1005467	1019217	-	uncharacterized LOC105431727
LOC105428329	76.4025	1.09543	0.348911	3.13955	0.00169207	0.00464791	NW_011933684.1	59871	98282	+	sushi, von Willebrand factor type A, EGF and pentraxin domain-containing protein 1
LOC105433758	1606.81	1.09511	0.143632	7.6244	2.45173e-14	3.45355e-13	NW_011933330.1	278348	281886	+	lymphoid-specific helicase-like
LOC105430518	2280	1.09344	0.0889197	12.297	9.4043e-35	7.17109e-33	NW_011933718.1	3000154	3005011	-	peregrin
LOC105429457	237.119	1.09297	0.154229	7.08669	1.37354e-12	1.57579e-11	NW_011933704.1	410268	413185	+	popeye domain-containing protein 3-like
LOC105422794	39.4671	1.0929	0.326611	3.3462	0.000819281	0.00242906	NW_011933420.1	113148	120102	+	extracellular signal-regulated kinase 2
LOC105433455	739.079	1.09257	0.128216	8.52136	1.57686e-17	3.10967e-16	NW_011930130.1	14935	16302	-	dihydrofolate reductase, transcript variant X1
LOC105424799	1265.95	1.09021	0.0967155	11.2724	1.79669e-29	9.69363e-28	NW_011933577.1	334158	336041	+	uncharacterized LOC105424799
LOC105422708	201.905	1.0902	0.237293	4.5943	4.34195e-06	2.00741e-05	NW_011933416.1	66107	96044	+	sushi, von Willebrand factor type A, EGF and pentraxin domain-containing protein 1, transcript variant X1
LOC105432109	595.508	1.09017	0.147024	7.41485	1.21759e-13	1.57543e-12	NW_011933758.1	584350	586888	-	protein aurora borealis, transcript variant X1
LOC105432019	305.324	1.0879	0.238322	4.56484	4.99864e-06	2.28972e-05	NW_011933757.1	1818604	1820389	+	deoxycytidylate deaminase, transcript variant X2
LOC105430132	68.8207	1.0872	0.306616	3.5458	0.000391429	0.00123236	NW_011933716.1	728553	731137	+	uncharacterized LOC105430132
LOC105433296	440.918	1.08559	0.168373	6.44757	1.13659e-10	1.02769e-09	NW_011933311.1	49639	78105	-	uncharacterized LOC105433296, transcript variant X2
LOC105424406	258.939	1.08504	0.179873	6.03226	1.61686e-09	1.25126e-08	NW_011933563.1	439197	443560	-	transient receptor potential channel pyrexia-like, transcript variant X2
LOC105431597	1372.54	1.08495	0.114231	9.49786	2.14256e-21	6.38193e-20	NW_011933745.1	855156	858838	+	CCAAT/enhancer-binding protein gamma, transcript variant X3
LOC105423361	89.877	1.08489	0.258699	4.19364	2.74514e-05	0.000108137	NW_011933463.1	220712	223408	+	uncharacterized LOC105423361, transcript variant X2
LOC105433857	43.7149	1.08408	0.289742	3.74154	0.000182894	0.000613652	NW_011933336.1	235788	248526	+	serine/threonine-protein kinase BRSK2, transcript variant X1
LOC105433505	735.629	1.08372	0.132376	8.18665	2.68604e-16	4.7266e-15	NW_011933321.1	73695	75036	-	zinc finger Ran-binding domain-containing protein 2-like, transcript variant X2
LOC105427119	753.238	1.08302	0.131823	8.21573	2.10883e-16	3.75713e-15	NW_011933238.1	73920	76296	-	plectin-like
LOC105424526	1660.01	1.08256	0.120267	9.00131	2.2304e-19	5.45114e-18	NW_011933571.1	276070	277282	-	39S ribosomal protein L18, mitochondrial
LOC105433980	1282.77	1.07988	0.143421	7.52942	5.09673e-14	6.94005e-13	NW_011933339.1	322703	326144	-	male-specific lethal 3 homolog, transcript variant X3
LOC105432036	827.784	1.07621	0.2186	4.92321	8.51361e-07	4.39236e-06	NW_011933757.1	2307023	2316103	+	DNA polymerase alpha subunit B, transcript variant X1
LOC105433314	911.339	1.07561	0.152906	7.03447	2.00017e-12	2.24734e-11	NW_011933311.1	337111	341304	+	uncharacterized LOC105433314, transcript variant X1
LOC105422015	60.5132	1.07543	0.326463	3.29418	0.000987106	0.00288613	NW_011933355.1	886307	888370	-	flightin, transcript variant X1
LOC105432281	86.6872	1.07503	0.252818	4.25217	2.11709e-05	8.5235e-05	NW_011933761.1	1707288	1806239	+	tetraspanin-5, transcript variant X5
LOC105433119	490.876	1.07448	0.142702	7.52951	5.09301e-14	6.94005e-13	NW_011933768.1	505245	507595	-	uncharacterized LOC105433119, transcript variant X2
LOC105427869	166.979	1.07263	0.202464	5.2979	1.17143e-07	6.86765e-07	NW_011933673.1	33432	132166	-	cadherin-related tumor suppressor
LOC105433382	1717.53	1.07081	0.108811	9.84097	7.4987e-23	2.48609e-21	NW_011933313.1	133292	135394	-	uncharacterized LOC105433382, transcript variant X2
LOC105431090	53.5976	1.07006	0.355816	3.00732	0.00263559	0.00686849	NW_011933728.1	718698	721557	-	NPC intracellular cholesterol transporter 2-like
LOC105422580	1378.36	1.06951	0.140341	7.62083	2.52055e-14	3.53743e-13	NW_011933406.1	715491	717249	-	zinc finger protein 84-like
LOC105434257	897.903	1.06777	0.42708	2.50016	0.0124137	0.0268814	NW_011933351.1	273255	277565	+	cysteine dioxygenase type 1
LOC105426937	31.939	1.06777	0.366738	2.91153	0.00359668	0.00899602	NW_011933235.1	87179	89407	+	homeobox protein Nkx-2.5-like
LOC105424267	1805.35	1.06649	0.266221	4.00604	6.1745e-05	0.000226504	NW_011933557.1	699701	704360	-	alpha-tocopherol transfer protein-like, transcript variant X2
LOC105424839	34.5025	1.06558	0.338574	3.14725	0.00164814	0.0045469	NW_011933577.1	638536	639126	+	uncharacterized LOC105424839
LOC105434013	3445.78	1.0652	0.128827	8.26848	1.35679e-16	2.45943e-15	NW_011933340.1	271870	281836	+	G2/mitotic-specific cyclin-B3, transcript variant X2
LOC105428332	50.6875	1.06341	0.342408	3.10568	0.00189841	0.00513455	NW_011933684.1	178234	186452	+	transient-receptor-potential-like protein
LOC105429800	62.4982	1.06151	0.307787	3.44884	0.000563002	0.00172505	NW_011933268.1	414575	429836	-	hydrocephalus-inducing protein homolog
LOC105425079	64.1286	1.05986	0.276816	3.82874	0.000128801	0.000446298	NW_011933585.1	507992	536331	+	Kv channel-interacting protein 4
LOC105423596	972.03	1.05873	0.171831	6.16148	7.20691e-10	5.85875e-09	NW_011933502.1	662622	665938	+	serine/threonine-protein kinase VRK1
LOC105429527	1878.65	1.05697	0.125444	8.42588	3.58047e-17	6.95305e-16	NW_011933704.1	1462545	1467983	+	kinesin-like protein Klp61F
LOC105425623	589.785	1.05372	0.1353	7.78798	6.80881e-15	1.02879e-13	NW_011933600.1	738174	740156	+	KIF1-binding protein homolog, transcript variant X1
LOC105433029	3603.76	1.0515	0.117157	8.97514	2.82984e-19	6.84307e-18	NW_011933767.1	1155036	1156673	+	seipin
LOC105429006	21.3321	1.05122	0.455811	2.30626	0.0210964	0.0429589	NW_011933265.1	36900	37719	+	uncharacterized LOC105429006
LOC105432415	7868.48	1.05072	0.1586	6.62501	3.47232e-11	3.35159e-10	NW_011933763.1	1348661	1352738	+	UDP-glucuronosyltransferase 2B1-like
LOC105434247	1307.61	1.04867	0.120487	8.70357	3.21602e-18	6.90147e-17	NW_011933351.1	591273	593113	-	cell growth-regulating nucleolar protein
LOC105427624	1026.58	1.04797	0.110291	9.5018	2.06285e-21	6.17668e-20	NW_011933669.1	1068591	1071067	+	E3 ubiquitin-protein ligase TRAIP
LOC105424321	536.482	1.04613	0.165903	6.30571	2.86867e-10	2.4615e-09	NW_011932622.1	722	1314	-	DNA replication factor Cdt1-like
LOC105429607	16.5852	1.04481	0.460182	2.27042	0.0231819	0.0466903	NW_011933706.1	76701	108101	-	uncharacterized LOC105429607, transcript variant X2
LOC105426331	722.887	1.04228	0.0987734	10.5522	4.96134e-26	2.06356e-24	NW_011933624.1	518468	520509	-	nuclear envelope phosphatase-regulatory subunit 1 homolog
LOC105428768	981.322	1.04189	0.143583	7.25637	3.97607e-13	4.85361e-12	NW_011933694.1	449934	494063	-	phosphatidylglycerophosphatase and protein-tyrosine phosphatase 1, transcript variant X3
LOC105425127	1007.53	1.04021	0.125308	8.30124	1.03033e-16	1.92249e-15	NW_011933588.1	116499	145762	+	uncharacterized LOC105425127
LOC105425232	659.361	1.03854	0.124967	8.3105	9.53013e-17	1.78698e-15	NW_011933590.1	1063609	1064846	+	mitotic spindle assembly checkpoint protein MAD2A
LOC105424407	35.0742	1.03737	0.443834	2.33729	0.019424	0.0399231	NW_011933563.1	452938	577485	-	uncharacterized LOC105424407
LOC105422248	174.357	1.03529	0.335687	3.08411	0.00204164	0.00547918	NW_011933377.1	89973	99173	+	uncharacterized LOC105422248, transcript variant X2
LOC105430169	102.411	1.03501	0.281711	3.674	0.000238781	0.000785271	NW_011933274.1	104250	106211	-	putative FERM domain-containing protein FRMD8P1
LOC105425879	43954.3	1.03001	0.103714	9.93122	3.04514e-23	1.04282e-21	NW_011933214.1	103941	107587	-	uncharacterized LOC105425879, transcript variant X2
LOC105426058	669.959	1.02992	0.111356	9.2489	2.26806e-20	6.16202e-19	NW_011933217.1	166009	168294	-	probable enoyl-CoA hydratase
LOC105427202	173.969	1.02835	0.234515	4.38498	1.15997e-05	4.92856e-05	NW_011933653.1	590614	595574	-	uncharacterized LOC105427202
LOC105422008	1376.05	1.02755	0.0999899	10.2766	8.98583e-25	3.426e-23	NW_011933355.1	855975	857743	-	uncharacterized LOC105422008
LOC105426921	611.25	1.02534	0.212881	4.81649	1.46104e-06	7.24063e-06	NW_011933646.1	449327	452398	-	glycine-rich cell wall structural protein-like
LOC105427632	738.98	1.02475	0.138768	7.38463	1.5288e-13	1.94078e-12	NW_011933669.1	1133597	1137059	-	uncharacterized LOC105427632
LOC105426558	2380.1	1.02237	0.146121	6.99676	2.61953e-12	2.88653e-11	NW_011933632.1	396460	420958	+	band 3 anion transport protein, transcript variant X4
LOC105425009	1965.7	1.02172	0.111807	9.13817	6.35176e-20	1.6437e-18	NW_011933583.1	282266	283907	+	cysteine and histidine-rich domain-containing protein
LOC105426285	191.223	1.02165	0.167082	6.11467	9.67553e-10	7.71211e-09	NW_011933623.1	297640	300843	-	protein Cep89 homolog, transcript variant X1
LOC105426492	857.149	1.02022	0.110513	9.23171	2.66346e-20	7.21911e-19	NW_011933632.1	31688	33432	-	uncharacterized LOC105426492
LOC105428098	3537.71	1.01956	0.115892	8.7975	1.39898e-18	3.11314e-17	NW_011933678.1	577621	583105	+	nuclear fragile X mental retardation-interacting protein 1
LOC105425288	1491.19	1.01955	0.191853	5.3142	1.07129e-07	6.33906e-07	NW_011933210.1	111503	120426	+	serine protease inhibitor 88Ea-like, transcript variant X1
LOC105422181	1175.85	1.01953	0.130639	7.80418	5.98906e-15	9.13372e-14	NW_011933373.1	19661	21909	-	GATOR complex protein NPRL2, transcript variant X4
LOC105429004	1258.88	1.01584	0.156672	6.48389	8.93853e-11	8.18978e-10	NW_011933696.1	368259	390190	-	uncharacterized LOC105429004
LOC105427826	1841.16	1.01565	0.0896493	11.3291	9.41733e-30	5.20364e-28	NW_011933671.1	255790	259195	-	endoplasmic reticulum junction formation protein lunapark-B
LOC105430952	46.6326	1.01497	0.360732	2.81365	0.00489818	0.0117948	NW_011933295.1	186425	187632	+	uncharacterized LOC105430952, transcript variant X1
LOC105431283	266.615	1.01484	0.188516	5.38328	7.31396e-08	4.4416e-07	NW_011933734.1	474431	485575	-	zinc finger CCCH domain-containing protein 13
LOC105429008	19524.7	1.01393	0.224599	4.51442	6.34888e-06	2.83334e-05	NW_011933696.1	420614	424407	-	uncharacterized LOC105429008
LOC105427344	754.107	1.0122	0.141522	7.15228	8.5346e-13	1.01055e-11	NW_011933665.1	268608	272785	+	serine/threonine-protein kinase PLK4
LOC105427424	5818.18	1.01149	0.12796	7.90479	2.68387e-15	4.26955e-14	NW_011933667.1	381172	389485	+	glutamyl aminopeptidase-like
LOC105430015	4219.74	1.00839	0.106813	9.44065	3.70475e-21	1.08099e-19	NW_011933716.1	513934	522112	+	uncharacterized LOC105430015, transcript variant X1
LOC105432050	28.167	1.00277	0.374211	2.67969	0.00736894	0.0169249	NW_011933757.1	999862	1009821	-	receptor-type tyrosine-protein phosphatase kappa-like
LOC105422222	188.716	1.00192	0.309746	3.23466	0.00121786	0.00348683	NW_011933373.1	238201	244981	-	transferrin-like
LOC105434333	2300.47	1.00116	0.0770516	12.9933	1.3346e-38	1.25124e-36	NW_011933354.1	573568	578446	+	non-canonical poly(A) RNA polymerase PAPD5-like
LOC105423056	2251.48	1.00024	0.10342	9.67161	3.98062e-22	1.25774e-20	NW_011933434.1	380928	383240	-	zinc finger protein 622
LOC105434048	2912.21	1.00013	0.115087	8.69026	3.61614e-18	7.73109e-17	NW_011933341.1	516947	520858	-	inner centromere protein-like, transcript variant X1
LOC105422057	1718.49	-1.00052	0.230713	-4.33664	1.44677e-05	6.01532e-05	NW_011933356.1	372325	376600	+	uncharacterized LOC105422057
LOC105423643	363.241	-1.00079	0.262867	-3.8072	0.000140549	0.000482762	NW_011933504.1	244389	247389	+	D-arabinitol dehydrogenase 1-like
LOC105430302	56.7659	-1.00085	0.281689	-3.55303	0.000380815	0.00120126	NW_011933717.1	1670484	1738696	-	epithelial discoidin domain-containing receptor 1-like
LOC105432470	183.165	-1.00119	0.22266	-4.49652	6.90745e-06	3.06706e-05	NW_011933763.1	2730962	2772019	+	mushroom body large-type Kenyon cell-specific protein 1, transcript variant X1
LOC105433741	1550.78	-1.0036	0.22382	-4.48397	7.32678e-06	3.23441e-05	NW_011933330.1	445669	449185	+	very-long-chain 3-oxoacyl-CoA reductase, transcript variant X2
LOC105428191	3293.18	-1.00485	0.110453	-9.0975	9.24326e-20	2.33904e-18	NW_011933255.1	6116	9060	+	chitinase-3-like protein 2
LOC105432739	117.999	-1.00565	0.294054	-3.41995	0.00062632	0.00189721	NW_011933765.1	863334	864834	-	uncharacterized LOC105432739
LOC105429559	103.074	-1.00724	0.242718	-4.14983	3.32722e-05	0.000128956	NW_011933705.1	66591	69339	+	iodotyrosine deiodinase 1
LOC105433255	610.197	-1.00779	0.200248	-5.03269	4.83634e-07	2.59953e-06	NW_011933308.1	277359	297161	-	monocarboxylate transporter 12
LOC105422383	440.29	-1.00837	0.138168	-7.29816	2.91721e-13	3.61507e-12	NW_011933381.1	357743	644722	+	mannosyl-oligosaccharide 1,2-alpha-mannosidase IB-like, transcript variant X2
LOC105429729	5030.19	-1.01019	0.154563	-6.53581	6.32646e-11	5.91193e-10	NW_011933709.1	698267	717077	+	dmX-like protein 2
LOC105431899	9606.06	-1.01096	0.106934	-9.45398	3.26195e-21	9.61604e-20	NW_011933754.1	113212	139935	-	protein singed, transcript variant X2
LOC105430074	1001.37	-1.01177	0.221838	-4.56086	5.09446e-06	2.32709e-05	NW_011933716.1	1003107	1049365	+	microtubule-associated protein futsch-like
LOC105424484	375.758	-1.01207	0.151576	-6.67693	2.43997e-11	2.39351e-10	NW_011933569.1	142159	148918	+	endothelin-converting enzyme homolog
LOC105422007	1357.82	-1.01257	0.107865	-9.38741	6.14955e-21	1.74972e-19	NW_011933355.1	828160	847020	-	bumetanide-sensitive sodium-(potassium)-chloride cotransporter, transcript variant X1
LOC105431337	210.727	-1.01356	0.318214	-3.18516	0.00144675	0.00405586	NW_011933738.1	149728	157555	+	calmodulin-lysine N-methyltransferase
LOC105433983	3782.59	-1.01363	0.122677	-8.26259	1.42548e-16	2.57677e-15	NW_011933339.1	339993	418414	-	uncharacterized LOC105433983, transcript variant X3
LOC105422001	1181.51	-1.01374	0.122244	-8.29279	1.10626e-16	2.04747e-15	NW_011933355.1	640193	804489	-	serine-rich adhesin for platelets
LOC105433144	7096.12	-1.01424	0.144356	-7.02594	2.12632e-12	2.37973e-11	NW_011933770.1	39236	61520	-	BCL2/adenovirus E1B 19 kDa protein-interacting protein 3
LOC105430712	30.7767	-1.01473	0.361574	-2.80642	0.00500957	0.0120478	NW_011933721.1	220750	245015	-	homeobox protein SIX1
LOC105424302	21918	-1.01619	0.205939	-4.93444	8.03828e-07	4.17349e-06	NW_011933558.1	20024	62406	-	titin
LOC105423185	23.5848	-1.01634	0.405034	-2.50927	0.012098	0.0262974	NW_011933451.1	259895	261415	-	uncharacterized LOC105423185
LOC105434326	261.301	-1.01752	0.195254	-5.21127	1.87553e-07	1.06622e-06	NW_011933354.1	548579	551336	+	beta-1,3-galactosyltransferase 5-like
LOC105424140	39.1095	-1.01837	0.329012	-3.09523	0.00196662	0.00529774	NW_011933550.1	361563	366828	-	allergen Cr-PI-like
LOC105422297	157.034	-1.01903	0.234569	-4.34425	1.3975e-05	5.83592e-05	NW_011933378.1	164436	171134	-	uncharacterized LOC105422297
LOC105433881	3051.75	-1.01906	0.117363	-8.68295	3.85645e-18	8.21416e-17	NW_011933337.1	125572	175242	-	uncharacterized LOC105433881
LOC105427703	1332.75	-1.01924	0.157471	-6.47255	9.63617e-11	8.76838e-10	NW_011933670.1	102701	114674	-	protein decapentaplegic
LOC105426955	715.509	-1.02129	0.136307	-7.4926	6.75231e-14	9.01201e-13	NW_011933647.1	132425	140486	+	mannosyl-oligosaccharide alpha-1,2-mannosidase IA
LOC105423635	39.8242	-1.02343	0.297171	-3.44391	0.000573373	0.00175495	NW_011931980.1	127	990	-	uncharacterized LOC105423635
LOC105433616	1958.27	-1.02473	0.225281	-4.54869	5.3982e-06	2.45116e-05	NW_011933326.1	60277	63992	-	4-coumarate--CoA ligase 1-like
LOC105429924	6988.78	-1.02645	0.110613	-9.27968	1.69988e-20	4.66264e-19	NW_011933712.1	1017046	1019970	-	adenylate kinase
LOC105433852	2979.72	-1.02703	0.094524	-10.8652	1.68795e-27	7.94516e-26	NW_011933336.1	173792	187978	-	uncharacterized LOC105433852
LOC105430029	86.5937	-1.02843	0.221471	-4.64362	3.4236e-06	1.61215e-05	NW_011933716.1	680923	714859	+	tachykinin-like peptides receptor 99D, transcript variant X3
LOC105426655	169.678	-1.03018	0.455099	-2.26365	0.0235957	0.0474403	NW_011933635.1	504925	512002	+	L-asparaginase, transcript variant X2
LOC105426134	27.6973	-1.03021	0.402516	-2.55943	0.0104843	0.0231281	NW_011933618.1	383990	412296	+	follistatin-A
LOC105429725	456.476	-1.03129	0.154718	-6.66563	2.63531e-11	2.5719e-10	NW_011933709.1	662106	665606	-	RILP-like protein homolog, transcript variant X2
LOC105422969	8112.28	-1.03165	0.17381	-5.93551	2.92941e-09	2.19428e-08	NW_011933425.1	5431	7209	-	12 kDa FK506-binding protein
LOC105431587	147.622	-1.03265	0.372212	-2.77437	0.00553085	0.0131549	NW_011933303.1	11540	28242	-	coiled-coil domain-containing protein 63, transcript variant X2
LOC105427058	439.184	-1.03283	0.12706	-8.12869	4.33947e-16	7.55478e-15	NW_011933650.1	316708	345874	-	protein NDRG3, transcript variant X5
LOC105428626	1114.73	-1.03331	0.169607	-6.09237	1.11251e-09	8.7879e-09	NW_011933693.1	327743	335106	-	sphingomyelin phosphodiesterase, transcript variant X1
LOC105427895	242.235	-1.03352	0.153297	-6.74197	1.56253e-11	1.56637e-10	NW_011933673.1	341811	934941	+	RNA-binding protein Musashi homolog Rbp6, transcript variant X4
LOC105423349	128.633	-1.03681	0.359756	-2.88199	0.00395174	0.00977086	NW_011933463.1	168564	175057	+	armadillo repeat-containing protein gudu
LOC105426181	759.414	-1.03847	0.178824	-5.80724	6.35114e-09	4.5346e-08	NW_011933621.1	248651	273704	+	ankyrin repeat domain-containing protein 29
LOC105429875	176.784	-1.03988	0.262626	-3.95957	7.50858e-05	0.00027101	NW_011933712.1	859391	863320	+	WD repeat-containing protein 35
LOC105432972	229.2	-1.04108	0.168232	-6.1884	6.07794e-10	4.99063e-09	NW_011933307.1	14121	15759	+	uncharacterized LOC105432972
LOC105434286	325.817	-1.04399	0.160865	-6.48987	8.59116e-11	7.89283e-10	NW_011933353.1	210272	396308	-	dachshund homolog 2, transcript variant X2
LOC105432509	454.384	-1.0447	0.14693	-7.11017	1.15899e-12	1.35132e-11	NW_011933763.1	3823255	3848751	-	uncharacterized LOC105432509, transcript variant X2
LOC105427367	116.958	-1.04522	0.262758	-3.97788	6.95338e-05	0.000253047	NW_011933665.1	472762	474309	+	uncharacterized LOC105427367
LOC105429085	700.385	-1.05008	0.151985	-6.90911	4.8772e-12	5.19901e-11	NW_011933697.1	1498813	1502056	-	tetraspanin-31-A, transcript variant X1
LOC105431553	61.6265	-1.05134	0.273934	-3.83791	0.000124085	0.000431526	NW_011933745.1	99894	102649	+	location of vulva defective 1-like, transcript variant X1
LOC105424303	553.781	-1.05511	0.177386	-5.94812	2.71245e-09	2.0371e-08	NW_011933558.1	67454	98429	-	uncharacterized LOC105424303
LOC105428347	372.54	-1.05549	0.276505	-3.81725	0.000134947	0.000464917	NW_011933686.1	41302	46848	-	uncharacterized LOC105428347, transcript variant X2
LOC105428492	424.988	-1.05737	0.129629	-8.1569	3.43744e-16	5.99351e-15	NW_011933687.1	319497	321738	-	beta-1,4-mannosyl-glycoprotein 4-beta-N-acetylglucosaminyltransferase
LOC105428031	28.4491	-1.05854	0.362937	-2.9166	0.00353874	0.00886468	NW_011933676.1	96676	110670	+	uncharacterized LOC105428031
LOC105427381	2120.73	-1.05919	0.176124	-6.01388	1.8113e-09	1.39138e-08	NW_011933666.1	21791	29141	+	gonadotropin-releasing hormone II receptor, transcript variant X4
LOC105427670	94.6055	-1.06039	0.375021	-2.82754	0.00469075	0.0113623	NW_011933669.1	2036348	2048405	+	uncharacterized LOC105427670, transcript variant X1
LOC105425785	54.5955	-1.06046	0.420486	-2.52199	0.0116692	0.0254524	NW_011933607.1	1489537	1495696	+	protein quiver
LOC105427170	1323.9	-1.06254	0.122502	-8.67367	4.18426e-18	8.87932e-17	NW_011933653.1	154672	159075	+	transmembrane channel-like protein 5, transcript variant X2
LOC105422484	234.584	-1.06279	0.246498	-4.31156	1.6211e-05	6.67704e-05	NW_011933404.1	120259	162919	-	tyrosine-protein kinase-like otk
LOC105426023	214.534	-1.06391	0.205428	-5.179	2.23075e-07	1.25382e-06	NW_011933614.1	717805	718746	+	uncharacterized LOC105426023
LOC105426703	213.738	-1.06423	0.245446	-4.33592	1.45155e-05	6.033e-05	NW_011933636.1	142694	147347	-	leucine-rich repeat-containing protein 40-like, transcript variant X2
LOC105425049	666.566	-1.06461	0.13846	-7.68893	1.48368e-14	2.14814e-13	NW_011933583.1	518232	523771	-	lachesin-like
LOC105425119	75.6043	-1.06541	0.237603	-4.48398	7.32629e-06	3.23441e-05	NW_011933586.1	577190	604452	+	endothelial transcription factor GATA-2-like
LOC105426201	172.763	-1.06853	0.146908	-7.27348	3.50352e-13	4.28958e-12	NW_011933621.1	381326	450649	+	uncharacterized LOC105426201
LOC105431165	101.818	-1.07224	0.328485	-3.26419	0.00109779	0.00318207	NW_011933732.1	453361	473283	-	uncharacterized LOC105431165
LOC105434001	1316.55	-1.0741	0.138426	-7.75944	8.53084e-15	1.27217e-13	NW_011933339.1	590805	595479	+	probable glutamine-dependent NAD(+) synthetase
LOC105428210	1552.92	-1.07495	0.124099	-8.66199	4.63588e-18	9.76523e-17	NW_011933681.1	554031	628255	+	uncharacterized LOC105428210
LOC105428308	6183.47	-1.07512	0.155272	-6.92409	4.388e-12	4.69504e-11	NW_011933684.1	581686	588685	+	uncharacterized LOC105428308
LOC105425270	36.9928	-1.07576	0.303804	-3.54097	0.000398663	0.00125272	NW_011933590.1	1206918	1246449	-	uncharacterized LOC105425270
LOC105430440	1181.86	-1.07746	0.150531	-7.15771	8.20373e-13	9.72375e-12	NW_011933718.1	1275835	1283189	-	serine/threonine-protein kinase SIK2-like
LOC105434021	407.958	-1.07878	0.133094	-8.10543	5.25595e-16	9.05385e-15	NW_011933340.1	261120	266740	-	peroxisome biogenesis factor 1
LOC105428057	41.1187	-1.08478	0.33859	-3.20382	0.00135618	0.00383581	NW_011933678.1	38252	48285	-	neurotrimin-like, transcript variant X2
LOC105422913	325.198	-1.08528	0.242562	-4.47425	7.66811e-06	3.37079e-05	NW_011933420.1	2279085	2286703	-	rhythmically expressed gene 5 protein, transcript variant X2
LOC105423824	43.6143	-1.0861	0.320051	-3.3935	0.000690046	0.00207213	NW_011933528.1	64688	68797	+	uncharacterized LOC105423824
LOC105432762	1720.41	-1.08695	0.141448	-7.68446	1.53643e-14	2.21052e-13	NW_011933765.1	845663	858243	+	lysophosphatidylcholine acyltransferase
LOC105432236	23944.5	-1.08791	0.443489	-2.45306	0.0141647	0.0301761	NW_011933303.1	725647	733422	+	uncharacterized LOC105432236
LOC105433239	323.161	-1.08973	0.209119	-5.21106	1.8776e-07	1.06686e-06	NW_011933307.1	469988	492212	+	uncharacterized LOC105433239, transcript variant X1
LOC105428890	17475.3	-1.0908	0.119215	-9.14986	5.70094e-20	1.48536e-18	NW_011933695.1	1849671	1853935	+	glyceraldehyde-3-phosphate dehydrogenase 2-like
LOC105428937	50.8551	-1.09207	0.475353	-2.2974	0.0215962	0.0438053	NW_011933695.1	2403098	2406227	-	apolipoprotein D-like, transcript variant X3
LOC105431841	979.868	-1.09225	0.19954	-5.47384	4.40396e-08	2.77994e-07	NW_011933750.1	82015	84452	+	glutathione S-transferase 1-like, transcript variant X1
LOC105432794	4140.87	-1.09304	0.131791	-8.2937	1.0978e-16	2.03512e-15	NW_011933766.1	303820	310166	-	tetratricopeptide repeat protein 7B
LOC105429061	539.386	-1.09327	0.120898	-9.04294	1.52508e-19	3.79308e-18	NW_011933697.1	511833	623107	+	cadherin-99C, transcript variant X1
LOC105424245	1133.95	-1.095	0.190933	-5.73498	9.75251e-09	6.82258e-08	NW_011933557.1	203965	241412	-	titin-like
LOC105431455	114.158	-1.09511	0.321645	-3.40471	0.000662337	0.00199679	NW_011933743.1	569846	576657	+	carboxylesterase 1D
LOC105426143	103.241	-1.09551	0.305024	-3.59154	0.000328724	0.00105321	NW_011933619.1	6495	171738	+	lachesin-like, transcript variant X1
LOC105430071	40.5253	-1.09551	0.368331	-2.97425	0.00293705	0.00754752	NW_011933716.1	974002	975186	+	phosphomevalonate kinase
LOC105431786	409.508	-1.09591	0.356876	-3.07085	0.00213448	0.00569361	NW_011933748.1	2728996	2732036	+	lambda-crystallin homolog
LOC105427303	28.5518	-1.09982	0.448679	-2.45124	0.0142366	0.0303181	NW_011933661.1	234731	236572	-	uncharacterized LOC105427303
LOC105423711	616.784	-1.0999	0.1857	-5.92297	3.16184e-09	2.35757e-08	NW_011933510.1	419471	569948	-	protein tiptop, transcript variant X2
LOC105423295	1551.26	-1.1002	0.127914	-8.60112	7.89418e-18	1.60665e-16	NW_011933457.1	882591	920570	-	calcium-transporting ATPase sarcoplasmic/endoplasmic reticulum type
LOC105426975	36.0344	-1.10443	0.410952	-2.68748	0.0071993	0.0166053	NW_011933648.1	228883	229948	-	uncharacterized LOC105426975
LOC112552825	46.8389	-1.10467	0.333554	-3.31181	0.000926958	0.00272489	NW_011933711.1	157961	161252	+	muscle M-line assembly protein unc-89-like
LOC105434283	1456.43	-1.10503	0.102176	-10.8149	2.92603e-27	1.34409e-25	NW_011933353.1	116440	117513	+	protein cornichon homolog 4
LOC105428522	469.848	-1.10821	0.322838	-3.43272	0.000597554	0.00182068	NW_011933255.1	170942	186478	-	4-coumarate--CoA ligase 1-like
LOC105434238	39.7911	-1.10873	0.413508	-2.68128	0.00733406	0.0168617	NW_011933351.1	311364	313992	+	uncharacterized LOC105434238, transcript variant X1
LOC105428178	1687.46	-1.10928	0.173604	-6.38973	1.6618e-10	1.47346e-09	NW_011933681.1	683501	698978	+	excitatory amino acid transporter 1-like, transcript variant X1
LOC105428179	2306.27	-1.1105	0.129896	-8.54913	1.2402e-17	2.47132e-16	NW_011933681.1	705487	720786	-	galactosylgalactosylxylosylprotein 3-beta-glucuronosyltransferase P, transcript variant X4
LOC105424713	2709.66	-1.11134	0.16322	-6.80886	9.83751e-12	1.01922e-10	NW_011933575.1	266709	311293	+	protein pinocchio, transcript variant X2
LOC105432078	27242.9	-1.11139	0.126959	-8.75386	2.06176e-18	4.48336e-17	NW_011933758.1	170151	186365	+	profilin
LOC105425512	410.159	-1.11205	0.216097	-5.14606	2.66017e-07	1.4828e-06	NW_011933597.1	148733	159438	-	gamma-aminobutyric acid type B receptor subunit 1, transcript variant X2
LOC105430111	60.0821	-1.11207	0.326391	-3.40718	0.000656383	0.0019804	NW_011933272.1	25908	36733	+	uncharacterized protein DDB_G0284459-like, transcript variant X3
LOC105427619	225.024	-1.11302	0.210533	-5.28668	1.24558e-07	7.28747e-07	NW_011933669.1	1007807	1016872	+	trichohyalin-like
LOC105423690	443.076	-1.11322	0.314361	-3.54121	0.000398298	0.00125192	NW_011933509.1	55794	60674	-	angiotensin-converting enzyme-like
LOC105426996	7089.53	-1.11341	0.104983	-10.6056	2.80599e-26	1.18493e-24	NW_011933649.1	201966	207487	+	V-type proton ATPase subunit H, transcript variant X1
LOC105423528	8360.75	-1.11381	0.150626	-7.39457	1.41866e-13	1.80899e-12	NW_011933496.1	65654	92435	-	long-chain-fatty-acid--CoA ligase 5, transcript variant X1
LOC105434284	473.438	-1.11616	0.19449	-5.73894	9.52727e-09	6.68136e-08	NW_011933353.1	122919	129320	+	1-phosphatidylinositol 4,5-bisphosphate phosphodiesterase classes I and II, transcript variant X3
LOC105428460	37.2999	-1.11748	0.362721	-3.08084	0.00206419	0.00552803	NW_011933686.1	2399625	2463357	+	uncharacterized LOC105428460, transcript variant X1
LOC105426802	42.3903	-1.11751	0.386228	-2.89339	0.00381106	0.00946393	NW_011933638.1	278828	296162	+	mucin-5AC, transcript variant X1
LOC105426618	137.181	-1.11849	0.286347	-3.90605	9.38157e-05	0.000333976	NW_011933635.1	34110	36981	-	uncharacterized LOC105426618, transcript variant X2
LOC105433122	376.882	-1.11891	0.178872	-6.25536	3.96597e-10	3.34718e-09	NW_011933768.1	510030	516376	+	uncharacterized LOC105433122
LOC105432135	1587.42	-1.11903	0.181375	-6.16974	6.84044e-10	5.58465e-09	NW_011933758.1	802730	811285	-	pancreatic lipase-related protein 2-like
LOC105427462	49.723	-1.11907	0.380493	-2.94111	0.00327043	0.00826861	NW_011933667.1	1085572	1145210	-	uncharacterized LOC105427462, transcript variant X2
LOC105431671	2069.63	-1.12013	0.134518	-8.32698	8.29283e-17	1.56009e-15	NW_011933748.1	360539	391771	-	very low-density lipoprotein receptor-like
LOC105429024	116.113	-1.12052	0.234237	-4.7837	1.72098e-06	8.46646e-06	NW_011933696.1	692356	754913	-	Wilms tumor protein homolog
LOC105428324	954.049	-1.12071	0.157739	-7.10484	1.20465e-12	1.40028e-11	NW_011933684.1	829020	842021	-	tetraspanin-9, transcript variant X1
LOC105428872	749.208	-1.12072	0.0917333	-12.2172	2.51676e-34	1.8453e-32	NW_011933695.1	1702053	1704746	+	solute carrier family 25 member 44
LOC105429743	728.248	-1.12195	0.248605	-4.51299	6.39205e-06	2.85038e-05	NW_011933709.1	780043	785881	-	angiopoietin-2, transcript variant X2
LOC105433153	2707.77	-1.12256	0.17934	-6.25938	3.86518e-10	3.26513e-09	NW_011933770.1	176327	183072	-	nuclear hormone receptor HR96
LOC112552900	19.4949	-1.12316	0.451372	-2.48833	0.0128346	0.0277037	NW_011933298.1	151520	151981	+	uncharacterized LOC112552900
LOC112552413	3517.95	-1.12353	0.234394	-4.79334	1.64029e-06	8.08694e-06	NW_011933558.1	3545	18441	-	titin-like
LOC105429884	172.849	-1.1262	0.242879	-4.63685	3.53754e-06	1.66307e-05	NW_011933712.1	1082871	1092229	+	gamma-1-syntrophin, transcript variant X1
LOC105421971	112.85	-1.12695	0.240076	-4.69415	2.67722e-06	1.28233e-05	NW_011933355.1	20252	62974	-	GTP-binding protein RAD, transcript variant X8
LOC105425904	237.606	-1.12784	0.38341	-2.94161	0.00326515	0.00826073	NW_011933613.1	143501	146951	+	uncharacterized LOC105425904
LOC105433308	57814.4	-1.1301	0.107224	-10.5396	5.67263e-26	2.35085e-24	NW_011933311.1	203937	210947	-	fatty acid-binding protein, muscle, transcript variant X2
LOC105427713	32.0671	-1.1302	0.445789	-2.53528	0.0112358	0.0246102	NW_011933670.1	153102	167788	-	cyclin-dependent kinase 5 activator 1
LOC105429304	28.5469	-1.13023	0.450339	-2.50974	0.0120821	0.0262678	NW_011933701.1	70971	74998	+	beta-1,4-glucuronyltransferase 1-like
LOC105433812	71.7755	-1.13188	0.293885	-3.85144	0.000117425	0.00040986	NW_011933334.1	171615	178859	+	uncharacterized LOC105433812, transcript variant X1
LOC105430495	1353.93	-1.13316	0.203784	-5.56057	2.68889e-08	1.75746e-07	NW_011933718.1	2329413	2384679	-	toll-like receptor 6
LOC105430442	1626.58	-1.13436	0.152972	-7.41547	1.2119e-13	1.56985e-12	NW_011933718.1	1568002	1601366	+	B-cell lymphoma/leukemia 11A
LOC105422321	1008.74	-1.13499	0.159588	-7.11199	1.14378e-12	1.33496e-11	NW_011933378.1	727722	744293	-	hemicentin-2
LOC105424892	56.063	-1.13507	0.435695	-2.6052	0.00918217	0.0205128	NW_011933205.1	9051	77558	+	muscle, skeletal receptor tyrosine protein kinase-like
LOC105434121	15953.8	-1.13551	0.16598	-6.84122	7.85214e-12	8.17967e-11	NW_011933341.1	988279	994881	+	putative phospholipase B-like lamina ancestor, transcript variant X2
LOC105425604	755.289	-1.13644	0.279617	-4.06426	4.81861e-05	0.000180706	NW_011933600.1	127253	130348	-	aminomethyltransferase, mitochondrial
LOC105428232	53.7216	-1.14075	0.443157	-2.57414	0.0100488	0.0222553	NW_011933255.1	38428	40602	-	1,5-anhydro-D-fructose reductase-like, transcript variant X1
LOC105432026	20.0835	-1.14262	0.471525	-2.42325	0.0153824	0.0325039	NW_011933757.1	2109497	2153579	-	T-box transcription factor TBX20-like
LOC105422219	4481.34	-1.14511	0.170441	-6.71852	1.83581e-11	1.82433e-10	NW_011933373.1	208829	226349	-	janus kinase and microtubule-interacting protein 3
LOC105428149	39.9264	-1.14687	0.373966	-3.06677	0.00216384	0.0057652	NW_011933681.1	418888	422989	-	muscarinic acetylcholine receptor DM1, transcript variant X2
LOC105432776	82.4651	-1.15049	0.313367	-3.67138	0.000241248	0.000792246	NW_011933766.1	208809	212583	-	probable G-protein coupled receptor B0563.6
LOC105430725	447.759	-1.15309	0.201638	-5.71864	1.07382e-08	7.45741e-08	NW_011933722.1	99	11297	+	zinc finger protein 704-like, transcript variant X2
LOC105422122	1969.68	-1.15353	0.110622	-10.4277	1.85257e-25	7.43497e-24	NW_011933366.1	91296	102665	-	uncharacterized LOC105422122
LOC105425911	60.2901	-1.15561	0.357863	-3.22919	0.00124142	0.00354629	NW_011933613.1	218309	226295	+	uncharacterized LOC105425911, transcript variant X2
LOC105429215	1488.39	-1.15674	0.124785	-9.26983	1.86444e-20	5.10164e-19	NW_011933699.1	1212850	1220593	-	dual specificity protein phosphatase Mpk3
LOC105425784	24.3048	-1.15759	0.442656	-2.61509	0.00892047	0.0199907	NW_011933607.1	1218796	1475124	-	uncharacterized LOC105425784
LOC105432382	748.471	-1.15912	0.255051	-4.54466	5.50232e-06	2.49417e-05	NW_011933763.1	891572	894692	+	prion-like-(Q/N-rich) domain-bearing protein 25
LOC105422513	919.948	-1.15986	0.146474	-7.91852	2.40357e-15	3.84504e-14	NW_011933404.1	807319	809286	+	uncharacterized LOC105422513
LOC105422766	96.5576	-1.1599	0.24755	-4.68551	2.79261e-06	1.33592e-05	NW_011933418.1	265276	274927	-	potassium voltage-gated channel protein Shaw
LOC105429546	1488.08	-1.16174	0.222846	-5.2132	1.85611e-07	1.05571e-06	NW_011933704.1	1962648	1972633	+	annulin, transcript variant X3
LOC105422242	1054.81	-1.16319	0.249775	-4.65695	3.20933e-06	1.51876e-05	NW_011933376.1	17544	42180	-	hemicentin-2
LOC105429630	441.158	-1.16561	0.190695	-6.11243	9.81258e-10	7.81046e-09	NW_011933708.1	181690	185550	+	protein MNN4-like, transcript variant X1
LOC112552758	62.7714	-1.16636	0.510795	-2.28342	0.0224058	0.0452663	NW_011933695.1	1606317	1607095	-	uncharacterized LOC112552758
LOC105433380	19.2775	-1.16659	0.458137	-2.54638	0.0108846	0.0239097	NW_011933313.1	121199	124089	+	uncharacterized LOC105433380
LOC105429745	247.659	-1.16667	0.290881	-4.0108	6.05124e-05	0.000222548	NW_011933709.1	793006	797398	+	uncharacterized LOC105429745
LOC105424919	841.093	-1.16788	0.259486	-4.50076	6.77105e-06	3.00825e-05	NW_011933207.1	6	3824	+	putative leucine-rich repeat-containing protein DDB_G0290503
LOC105427782	23.2679	-1.16842	0.383538	-3.04644	0.00231571	0.00612984	NW_011933671.1	138234	143609	-	segmentation polarity homeobox protein engrailed-like
LOC105433639	23.7272	-1.1688	0.38916	-3.0034	0.00266981	0.00694344	NW_011933327.1	262132	262548	+	uncharacterized LOC105433639
LOC105427273	30.0586	-1.16904	0.392176	-2.98091	0.00287394	0.00740195	NW_011933656.1	5812	21411	+	homeotic protein spalt-major-like, transcript variant X1
LOC105425990	26.3478	-1.1694	0.506596	-2.30835	0.0209796	0.0427439	NW_011933614.1	488792	495318	-	uncharacterized LOC105425990
LOC105432012	32.5263	-1.17119	0.376754	-3.10862	0.00187964	0.005091	NW_011933757.1	1476347	1503686	+	synaptotagmin-10-like
LOC112552561	110.475	-1.17258	0.226094	-5.18626	2.14558e-07	1.21071e-06	NW_011933631.1	63820	64605	+	protein let-653-like
LOC105432975	326.53	-1.17307	0.31761	-3.69343	0.00022125	0.000731405	NW_011933767.1	306036	578318	-	uncharacterized LOC105432975, transcript variant X2
LOC105423273	1221.95	-1.17366	0.116235	-10.0973	5.67682e-24	2.04831e-22	NW_011933457.1	14295	19496	+	transcription factor cwo
LOC105433152	1782.37	-1.17466	0.0814112	-14.4287	3.41533e-47	5.00828e-45	NW_011933770.1	169710	175846	+	N-acetyl-D-glucosamine kinase, transcript variant X1
LOC105426324	137.859	-1.17929	0.298448	-3.95139	7.76974e-05	0.000279818	NW_011933624.1	318671	415133	+	potassium voltage-gated channel subfamily H member 6, transcript variant X9
LOC105427902	593.987	-1.17963	0.141992	-8.30774	9.75441e-17	1.82604e-15	NW_011933674.1	187856	239005	+	uncharacterized LOC105427902
LOC105426390	22.4413	-1.1812	0.503326	-2.34678	0.0189364	0.038991	NW_011933624.1	865652	868163	-	uncharacterized LOC105426390
LOC105421991	385.541	-1.1818	0.220639	-5.35623	8.49761e-08	5.10213e-07	NW_011933355.1	552373	566672	+	cadherin EGF LAG seven-pass G-type receptor 3
LOC105429092	696.674	-1.18253	0.208301	-5.67703	1.37057e-08	9.34801e-08	NW_011933697.1	1686551	1725105	+	collagen alpha chain CG42342, transcript variant X3
LOC105432030	659.909	-1.18595	0.21725	-5.45891	4.79079e-08	3.01083e-07	NW_011933757.1	2261712	2277941	+	uncharacterized LOC105432030, transcript variant X1
LOC105425264	110.776	-1.18699	0.350923	-3.38247	0.000718365	0.00215096	NW_011933590.1	875796	886207	-	titin-like
LOC105429005	1146	-1.18705	0.218125	-5.44209	5.26603e-08	3.28066e-07	NW_011933696.1	231048	247412	-	uncharacterized LOC105429005, transcript variant X1
LOC105423346	208.866	-1.18727	0.224705	-5.28371	1.26596e-07	7.39156e-07	NW_011933463.1	89559	93439	+	uncharacterized LOC105423346
LOC105425097	129.692	-1.18744	0.222307	-5.34147	9.21962e-08	5.5125e-07	NW_011933586.1	145976	154190	-	ras-related protein Rab-3, transcript variant X4
LOC105426743	331.089	-1.18832	0.27818	-4.27176	1.93937e-05	7.85777e-05	NW_011933637.1	389279	394262	-	plancitoxin-1, transcript variant X2
LOC105429095	78.9214	-1.18932	0.226068	-5.26089	1.43356e-07	8.29391e-07	NW_011933697.1	1733873	1738645	+	synaptic vesicle glycoprotein 2B-like
LOC105430710	37.9783	-1.19164	0.401273	-2.96964	0.00298151	0.00764801	NW_011933721.1	159090	160101	-	ADP-ribosylation factor-like protein 16
LOC105423285	108.43	-1.19185	0.397197	-3.00065	0.00269405	0.00699695	NW_011933457.1	41744	474460	-	agrin-like
LOC105434279	631.866	-1.19234	0.184155	-6.47464	9.50358e-11	8.66151e-10	NW_011933353.1	19876	95941	+	storkhead-box protein 2, transcript variant X1
LOC105429928	50.4962	-1.19263	0.26258	-4.54198	5.57278e-06	2.52341e-05	NW_011933713.1	67355	69488	+	uncharacterized LOC105429928
LOC105424514	4911.54	-1.19301	0.132875	-8.97842	2.74689e-19	6.65655e-18	NW_011933571.1	195806	203989	-	solute carrier family 2, facilitated glucose transporter member 5-like, transcript variant X1
LOC105430159	764.791	-1.19574	0.172614	-6.92727	4.29043e-12	4.59494e-11	NW_011933717.1	256682	263848	+	protein naked cuticle homolog 2
LOC105432905	516.437	-1.19622	0.161678	-7.39877	1.37451e-13	1.76055e-12	NW_011933766.1	1581403	1588104	+	nitric oxide synthase, salivary gland
LOC105424383	4748.83	-1.19861	0.115277	-10.3977	2.53974e-25	1.01218e-23	NW_011933563.1	81601	103708	-	matrix metalloproteinase-14, transcript variant X2
LOC105433223	77.7026	-1.19948	0.279263	-4.29516	1.74567e-05	7.14128e-05	NW_011934094.1	19	1136	-	G-protein coupled receptor Mth2-like
LOC105429556	3663.16	-1.20002	0.133483	-8.99005	2.47118e-19	6.01391e-18	NW_011933704.1	1448270	1454525	-	protein bric-a-brac 2-like
LOC105429225	103.425	-1.20267	0.248082	-4.84787	1.24795e-06	6.26604e-06	NW_011933699.1	1300153	1310343	-	uncharacterized LOC105429225
LOC105432041	97.2953	-1.20288	0.331695	-3.62646	0.000287333	0.000929972	NW_011933757.1	2613973	2620695	+	glucose dehydrogenase [FAD, quinone]-like
LOC105430085	29.9881	-1.20337	0.384856	-3.12681	0.00176712	0.00482395	NW_011933716.1	1215454	1217954	-	4-hydroxybutyrate coenzyme A transferase-like, transcript variant X3
LOC105429713	58.7616	-1.20537	0.366206	-3.2915	0.000996541	0.00291222	NW_011933709.1	428118	429478	+	uncharacterized LOC105429713
LOC105427620	222.145	-1.20615	0.190243	-6.34006	2.29676e-10	2.00079e-09	NW_011933669.1	1030603	1045675	+	ERAD-associated E3 ubiquitin-protein ligase HRD1B-like
LOC105429931	34.7798	-1.20749	0.412225	-2.9292	0.00339835	0.00855985	NW_011933270.1	77619	78786	-	vicilin-like seed storage protein At2g18540
LOC105434071	94.5806	-1.20766	0.325121	-3.71448	0.00020362	0.000677825	NW_011933341.1	650972	652586	-	uncharacterized LOC105434071
LOC105422720	394.177	-1.20768	0.230786	-5.23289	1.66876e-07	9.59643e-07	NW_011933416.1	137627	141345	+	cytoglobin-2
LOC105434374	236.427	-1.20831	0.276417	-4.37136	1.23478e-05	5.21929e-05	NW_011933354.1	1248170	1251849	-	midasin-like
LOC105426315	519.233	-1.21003	0.173355	-6.98005	2.95073e-12	3.2359e-11	NW_011933624.1	169249	172257	-	SH3 domain-containing kinase-binding protein 1, transcript variant X2
LOC105427928	444.721	-1.21231	0.342526	-3.53931	0.000401167	0.00126024	NW_011933674.1	911421	915856	-	FMRFamide receptor-like, transcript variant X2
LOC105426305	25.1418	-1.21445	0.376135	-3.22876	0.00124327	0.0035498	NW_011933624.1	79095	98948	+	uncharacterized LOC105426305
LOC105431294	1859.49	-1.21666	0.126524	-9.61603	6.84195e-22	2.10939e-20	NW_011933735.1	75441	92566	+	short-chain dehydrogenase/reductase family 16C member 6-like
LOC105433994	401.415	-1.22196	0.359737	-3.39682	0.000681741	0.00204827	NW_011930554.1	68	933	+	uncharacterized LOC105433994
LOC105423378	14667.2	-1.22275	0.169656	-7.20723	5.71031e-13	6.89699e-12	NW_011933465.1	40896	55526	-	uncharacterized LOC105423378
LOC105426314	37.7014	-1.22426	0.399392	-3.06532	0.00217439	0.00578927	NW_011933624.1	162253	164408	+	uncharacterized LOC105426314
LOC105430975	2942.79	-1.22475	0.178525	-6.86035	6.86906e-12	7.23465e-11	NW_011933725.1	3117391	3121092	-	mitochondrial dicarboxylate carrier
LOC105430381	323.768	-1.22686	0.19438	-6.31163	2.76104e-10	2.37807e-09	NW_011933718.1	816743	819991	+	toll-like receptor 13
LOC105432467	1760.63	-1.22866	0.125417	-9.79662	1.16412e-22	3.81526e-21	NW_011933763.1	2394337	2473021	-	uncharacterized LOC105432467
LOC105423144	46.2148	-1.22934	0.35304	-3.48217	0.000497375	0.00153881	NW_011933445.1	90260	118076	+	uncharacterized LOC105423144
LOC105422025	40.8536	-1.22967	0.467268	-2.63162	0.00849797	0.0191943	NW_011933355.1	1134508	1135192	+	uncharacterized LOC105422025
LOC112552676	55.7783	-1.22979	0.375183	-3.27785	0.00104603	0.00304284	NW_011933669.1	922784	922946	-	U1 spliceosomal RNA
LOC105434140	154.328	-1.23068	0.189929	-6.47967	9.1925e-11	8.39807e-10	NW_011933341.1	1089362	1096090	+	uncharacterized LOC105434140, transcript variant X2
LOC105431142	2150.37	-1.23189	0.520771	-2.3655	0.0180056	0.0373569	NW_011933730.1	185921	190077	-	MD-2-related lipid-recognition protein-like
LOC112552213	41.1581	-1.2331	0.278699	-4.42448	9.66739e-06	4.16167e-05	NW_011933360.1	124301	126168	-	uncharacterized LOC112552213
LOC105433342	75.1138	-1.23315	0.360335	-3.42223	0.000621095	0.00188288	NW_011933311.1	756537	785958	-	Down syndrome cell adhesion molecule-like protein Dscam2
LOC105432690	614.302	-1.2335	0.165706	-7.44389	9.77655e-14	1.27945e-12	NW_011933765.1	388111	414689	+	protein crumbs, transcript variant X1
LOC105433803	16791.2	-1.23444	0.151025	-8.17373	2.99007e-16	5.22942e-15	NW_011933334.1	44533	62956	+	peroxidase-like, transcript variant X4
LOC105428393	26.3975	-1.2346	0.346919	-3.55876	0.000372605	0.00117796	NW_011933686.1	750411	762759	-	GATA-binding factor C-like
LOC105431101	229.779	-1.23579	0.20742	-5.95793	2.55459e-09	1.92613e-08	NW_011933728.1	750390	752354	-	uncharacterized LOC105431101, transcript variant X4
LOC105431821	5228.68	-1.23734	0.148472	-8.33382	7.82725e-17	1.48225e-15	NW_011933748.1	468856	496764	+	failed axon connections
LOC105433199	153.732	-1.23778	0.210457	-5.88139	4.06838e-09	2.98487e-08	NW_011933770.1	815746	826826	+	uncharacterized LOC105433199
LOC105431237	309.812	-1.23839	0.162405	-7.62535	2.43364e-14	3.4323e-13	NW_011933734.1	235883	241256	+	zinc finger CCHC domain-containing protein 24-like
LOC105424837	84.1618	-1.23881	0.376497	-3.29036	0.0010006	0.00292239	NW_011933577.1	619569	624872	+	beta-galactosidase-like
LOC105431552	63685.7	-1.23922	0.158276	-7.82947	4.89932e-15	7.53204e-14	NW_011933745.1	8454	89211	-	uncharacterized LOC105431552
LOC105428810	41.4471	-1.23993	0.345986	-3.58376	0.000338678	0.00108116	NW_011933695.1	687624	688628	-	uncharacterized LOC105428810
LOC105424018	302.063	-1.24013	0.239107	-5.1865	2.14286e-07	1.20978e-06	NW_011933543.1	535261	544512	-	insulin-like receptor
LOC105422932	184.227	-1.24237	0.272709	-4.55567	5.22178e-06	2.37766e-05	NW_011933420.1	502728	583050	+	Down syndrome cell adhesion molecule-like
LOC105428548	2023.27	-1.24365	0.21019	-5.91678	3.28308e-09	2.44319e-08	NW_011933687.1	1035383	1050349	+	kinesin-like protein Klp98A, transcript variant X1
LOC105430596	7308.03	-1.24418	0.191894	-6.4837	8.95019e-11	8.18978e-10	NW_011933720.1	2537	4720	+	dolichyldiphosphatase 1-like
LOC105425114	622.477	-1.24501	0.238283	-5.22491	1.74237e-07	9.9646e-07	NW_011933586.1	79850	80751	-	uncharacterized LOC105425114
LOC105428636	1015.45	-1.2467	0.157722	-7.90437	2.69291e-15	4.27798e-14	NW_011933693.1	471859	479808	-	folliculin-interacting protein 2
LOC105432276	60.1504	-1.25312	0.410224	-3.05471	0.0022528	0.00597715	NW_011933761.1	1334922	1399805	+	uncharacterized LOC105432276
LOC105430107	432.153	-1.25346	0.548265	-2.28623	0.0222407	0.0449609	NW_011933716.1	1545094	1549591	-	venom protease-like
LOC105433783	3408.5	-1.25412	0.217946	-5.7543	8.70016e-09	6.14274e-08	NW_011933333.1	41826	55285	-	high-affinity choline transporter 1-like, transcript variant X1
LOC105426053	55.7908	-1.25614	0.448265	-2.80222	0.0050752	0.0121775	NW_011933616.1	333115	337076	+	uncharacterized LOC105426053
LOC105433748	242.966	-1.25939	0.195218	-6.45121	1.10961e-10	1.00569e-09	NW_011933330.1	474232	478082	-	protein giant-lens
LOC105432479	120.004	-1.25975	0.199137	-6.32606	2.51504e-10	2.17767e-09	NW_011933763.1	2879117	2882144	-	uncharacterized LOC105432479
LOC105427999	14.154	-1.26246	0.508411	-2.48316	0.0130224	0.0280457	NW_011933675.1	595125	597692	-	protein tilB homolog
LOC105428486	43.9195	-1.26255	0.311525	-4.0528	5.06084e-05	0.00018917	NW_011933687.1	147310	160815	+	LHFPL tetraspan subfamily member 6 protein-like, transcript variant X1
LOC105425662	1530.23	-1.26273	0.222151	-5.68411	1.31497e-08	8.98487e-08	NW_011933602.1	194534	196534	-	peptidoglycan-recognition protein 2-like
LOC105428422	2359.76	-1.26589	0.118573	-10.6761	1.31754e-26	5.73004e-25	NW_011933686.1	1129155	1154931	+	guanine nucleotide exchange factor for Rab-3A-like, transcript variant X2
LOC105433315	226.461	-1.26707	0.206022	-6.15017	7.74023e-10	6.26116e-09	NW_011933311.1	275041	332725	-	calmodulin, transcript variant X2
LOC105422047	2221.5	-1.26713	0.198215	-6.3927	1.6298e-10	1.44846e-09	NW_011933356.1	255806	267473	+	peroxidasin
LOC105423814	199.151	-1.26804	0.215429	-5.8861	3.9542e-09	2.9067e-08	NW_011933524.1	216467	222718	-	leucine-rich repeat-containing protein 24
LOC105426801	2511.5	-1.26831	0.113427	-11.1817	5.01009e-29	2.6408e-27	NW_011933638.1	245429	270188	+	serine proteinase stubble, transcript variant X2
LOC105422246	2495.39	-1.26869	0.127882	-9.92078	3.38119e-23	1.15445e-21	NW_011933377.1	103301	121722	+	pyruvate carboxylase, mitochondrial, transcript variant X2
LOC112552989	25.4108	-1.26975	0.434347	-2.92335	0.00346285	0.00870507	NW_011933763.1	1904825	1914790	+	uncharacterized LOC112552989
LOC112552398	36.4993	-1.26981	0.525778	-2.4151	0.0157309	0.033173	NW_011933548.1	143724	147378	-	uncharacterized LOC112552398
LOC105433899	3547.39	-1.27102	0.129692	-9.80036	1.12186e-22	3.68732e-21	NW_011933337.1	423982	436219	-	nicotinate phosphoribosyltransferase, transcript variant X3
LOC105429425	23.5563	-1.2715	0.446796	-2.84581	0.00442987	0.0108128	NW_011933704.1	204784	205097	+	uncharacterized LOC105429425
LOC105422216	598.824	-1.27177	0.256193	-4.9641	6.9019e-07	3.62794e-06	NW_011933373.1	177617	198313	+	solute carrier organic anion transporter family member 4A1, transcript variant X1
LOC105423458	143.303	-1.27272	0.413828	-3.07548	0.00210164	0.00561341	NW_011931879.1	586	4338	-	apyrase-like, transcript variant X1
LOC105430162	815.853	-1.276	0.240829	-5.29837	1.16839e-07	6.85685e-07	NW_011933717.1	305287	308060	-	zinc carboxypeptidase-like
LOC105431191	97.7207	-1.27629	0.296856	-4.29937	1.71283e-05	7.01949e-05	NW_011933732.1	486292	488055	+	uncharacterized LOC105431191
LOC105422980	2476.81	-1.27895	0.103047	-12.4114	2.26788e-35	1.77671e-33	NW_011933425.1	192276	193816	+	uncharacterized LOC105422980, transcript variant X1
LOC105432761	321.255	-1.27933	0.224497	-5.69864	1.20768e-08	8.31136e-08	NW_011933304.1	151670	155596	-	uncharacterized LOC105432761
LOC105429742	454.231	-1.28082	0.205809	-6.22336	4.86625e-10	4.0392e-09	NW_011933709.1	757313	779739	+	protein unc-79 homolog
LOC105429076	562.134	-1.28375	0.192219	-6.67859	2.41244e-11	2.36854e-10	NW_011933697.1	865033	1399833	+	CUGBP Elav-like family member 4, transcript variant X3
LOC105431744	96.1822	-1.284	0.314171	-4.08694	4.37097e-05	0.000165437	NW_011933748.1	1890411	1920975	-	homeobox protein prospero-like, transcript variant X4
LOC105429517	269.861	-1.28428	0.245709	-5.22684	1.72435e-07	9.87636e-07	NW_011933704.1	1217389	1270780	-	sodium-driven chloride bicarbonate exchanger, transcript variant X3
LOC105431836	30.3898	-1.28526	0.468735	-2.74198	0.00610699	0.0143716	NW_011933748.1	3004020	3007748	-	leucine-rich repeat-containing protein 74B-like
LOC105423813	263.329	-1.28595	0.189259	-6.79464	1.08583e-11	1.1189e-10	NW_011933524.1	223056	230319	-	carbonic anhydrase-related protein 10, transcript variant X2
LOC105431937	2302.4	-1.28831	0.132356	-9.73369	2.16585e-22	7.01785e-21	NW_011933754.1	715483	719379	-	pantothenate kinase 3
LOC105428957	1406.05	-1.28858	0.138293	-9.31774	1.18839e-20	3.30726e-19	NW_011933695.1	2769605	2770864	+	V-type proton ATPase subunit e 2-like
LOC105429460	36.0874	-1.28924	0.42642	-3.02341	0.00249941	0.00655843	NW_011933704.1	433210	436143	-	uncharacterized LOC105429460
LOC105432879	552.65	-1.2942	0.466457	-2.77454	0.005528	0.0131508	NW_011933766.1	1266043	1305559	-	uncharacterized LOC105432879, transcript variant X8
LOC105426479	3338.78	-1.29495	0.186605	-6.93952	3.93441e-12	4.23746e-11	NW_011933631.1	280779	296203	-	neurogenic protein mastermind
LOC105423946	573.347	-1.29597	0.290371	-4.46314	8.07671e-06	3.53952e-05	NW_011933538.1	58879	64580	-	uncharacterized LOC105423946
LOC105427449	207.13	-1.29629	0.275761	-4.70078	2.59164e-06	1.24604e-05	NW_011933667.1	542306	546300	+	trichohyalin
LOC112552188	63.56	-1.29771	0.305867	-4.24274	2.20803e-05	8.86466e-05	NW_011933307.1	156341	193384	+	proton channel OtopLc-like
LOC105428310	76.5122	-1.29815	0.495917	-2.61768	0.00885304	0.0198613	NW_011933684.1	600932	601716	-	uncharacterized LOC105428310
LOC105427404	41.495	-1.29876	0.341576	-3.80226	0.000143383	0.000491317	NW_011933667.1	79515	80921	-	tubulin beta chain-like
LOC105433876	7978.11	-1.29934	0.16237	-8.00232	1.22094e-15	2.01808e-14	NW_011933337.1	109886	113120	-	SH2B adapter protein 1
LOC105432513	184.995	-1.301	0.218197	-5.96249	2.48429e-09	1.87683e-08	NW_011933763.1	1102452	1111431	+	trichohyalin-like
LOC105423812	196.944	-1.30394	0.215719	-6.0446	1.49777e-09	1.167e-08	NW_011933524.1	238094	260296	-	uncharacterized LOC105423812
LOC105428361	41.3155	-1.30398	0.401276	-3.24959	0.00115571	0.00332637	NW_011933686.1	185732	189318	-	tetratricopeptide repeat protein 25, transcript variant X1
LOC105424488	7334.19	-1.30841	0.142126	-9.20596	3.38625e-20	9.09201e-19	NW_011933571.1	16497	19352	+	zinc finger protein OZF-like, transcript variant X2
LOC105427286	42.4103	-1.31323	0.357119	-3.67728	0.000235736	0.000776152	NW_011933657.1	23726	304737	+	adenylate kinase isoenzyme 5, transcript variant X1
LOC105426073	27.5739	-1.31376	0.403305	-3.25748	0.00112407	0.00324591	NW_011933616.1	514876	517701	+	uncharacterized LOC105426073
LOC105428713	34.6478	-1.31557	0.454733	-2.89306	0.00381504	0.00946971	NW_011933693.1	1491568	1494439	-	uncharacterized LOC105428713
LOC105429221	86.4692	-1.31681	0.325671	-4.04336	5.26909e-05	0.000196632	NW_011933699.1	1284725	1287425	-	uncharacterized LOC105429221, transcript variant X2
LOC105430254	73.6779	-1.31766	0.284945	-4.62427	3.75927e-06	1.75791e-05	NW_011933717.1	1582496	1601598	+	zwei Ig domain protein zig-8-like
LOC105427321	6544.84	-1.31998	0.152677	-8.64559	5.35284e-18	1.12135e-16	NW_011933663.1	261548	496204	-	uncharacterized LOC105427321
LOC105434061	301.457	-1.32067	0.188591	-7.00283	2.50838e-12	2.76938e-11	NW_011930700.1	225	1253	-	high affinity cationic amino acid transporter 1-like
LOC105422983	236.696	-1.32194	0.346382	-3.81642	0.000135402	0.000466343	NW_011933425.1	214406	221989	+	uncharacterized LOC105422983
LOC105426247	484.575	-1.32295	0.190632	-6.93978	3.92699e-12	4.23345e-11	NW_011933622.1	625984	635118	-	sodium/potassium-transporting ATPase subunit beta-2
LOC105434242	194.156	-1.33045	0.227831	-5.83964	5.23138e-09	3.79192e-08	NW_011933351.1	471780	478811	+	enhancer of split mgamma protein-like
LOC105427553	101.552	-1.33219	0.507195	-2.62658	0.00862487	0.0194425	NW_011933668.1	711446	715809	+	cytochrome P450 4C1-like, transcript variant X2
LOC105434209	374.267	-1.3327	0.171389	-7.77588	7.49225e-15	1.1261e-13	NW_011933350.1	233591	254140	+	uncharacterized LOC105434209, transcript variant X2
LOC105427714	276.612	-1.3333	0.289884	-4.59943	4.23641e-06	1.9594e-05	NW_011933670.1	148364	152903	-	muscle M-line assembly protein unc-89-like
LOC105427942	188.938	-1.34073	0.306039	-4.38091	1.18186e-05	5.01784e-05	NW_011933674.1	1014041	1015804	-	lysozyme-like
LOC105423590	39.6781	-1.34142	0.346099	-3.87584	0.000106258	0.000373387	NW_011933502.1	478320	488244	+	regulator of G-protein signaling 17, transcript variant X1
LOC105423913	420.228	-1.34179	0.193971	-6.9175	4.59672e-12	4.9046e-11	NW_011933534.1	1081774	1086922	-	uncharacterized LOC105423913
LOC105426531	841.828	-1.34204	0.270878	-4.95439	7.25561e-07	3.79989e-06	NW_011933632.1	209112	219875	-	solute carrier family 15 member 1-like, transcript variant X1
LOC105432611	326.971	-1.3436	0.237763	-5.651	1.59519e-08	1.07708e-07	NW_011933764.1	2081652	2105300	+	zwei Ig domain protein zig-8
LOC105425651	2814.72	-1.34427	0.146366	-9.1843	4.14211e-20	1.10437e-18	NW_011933213.1	101610	156995	+	neurotrimin-like
LOC105433517	53.8549	-1.34513	0.565117	-2.38026	0.0173004	0.0360309	NW_011930176.1	103	1785	-	protein henna-like
LOC105427468	4512	-1.34591	0.154421	-8.71586	2.88569e-18	6.20424e-17	NW_011933667.1	1485433	1489336	-	TBC1 domain family member 15, transcript variant X1
LOC105432882	88.1479	-1.34726	0.355635	-3.78833	0.000151664	0.000515983	NW_011933766.1	1226440	1308879	+	probable G-protein coupled receptor 158
LOC105428483	21.2067	-1.34929	0.568066	-2.37524	0.0175376	0.0364718	NW_011933687.1	59839	65595	+	kin of IRRE-like protein 3
LOC105431699	5910.45	-1.35083	0.175395	-7.70164	1.34326e-14	1.95722e-13	NW_011933748.1	606248	613568	-	probable G-protein coupled receptor Mth-like 1
LOC105423831	2304.34	-1.35121	0.164371	-8.22046	2.02724e-16	3.6174e-15	NW_011933532.1	50305	110006	-	low density lipoprotein receptor adapter protein 1-like, transcript variant X2
LOC105433402	91.418	-1.35172	0.539198	-2.50691	0.0121791	0.0264236	NW_011933313.1	286550	296367	+	protein obstructor-E-like
LOC105429397	144.874	-1.35316	0.183959	-7.35575	1.89864e-13	2.38907e-12	NW_011933703.1	170924	175727	+	protein msta-like
LOC105422905	1467.67	-1.35339	0.190149	-7.11751	1.09897e-12	1.28528e-11	NW_011933420.1	2248779	2259055	+	WD repeat, SAM and U-box domain-containing protein 1-like, transcript variant X4
LOC105430106	43.2132	-1.35446	0.377508	-3.5879	0.000333351	0.00106637	NW_011933716.1	1541691	1544929	-	uncharacterized LOC105430106, transcript variant X3
LOC105433923	1492.52	-1.35535	0.133557	-10.1481	3.37748e-24	1.23494e-22	NW_011933337.1	736846	754213	-	Na(+)/H(+) exchanger protein 2, transcript variant X3
LOC105426497	2746.34	-1.36051	0.123621	-11.0055	3.59508e-28	1.79565e-26	NW_011933632.1	42799	52572	-	uncharacterized LOC105426497
LOC105433322	715.68	-1.36196	0.302221	-4.50652	6.58997e-06	2.93521e-05	NW_011933311.1	669369	674293	+	tryptophan 2,3-dioxygenase, transcript variant X2
LOC105430057	106.92	-1.36258	0.264192	-5.15752	2.50237e-07	1.40236e-06	NW_011933716.1	901579	914405	-	probable sodium/potassium/calcium exchanger CG1090, transcript variant X1
LOC105423564	941.144	-1.36413	0.428465	-3.18377	0.00145371	0.00407138	NW_011933501.1	86663	95601	-	T-box transcription factor TBX1-A
LOC105428671	42.1796	-1.36439	0.519706	-2.6253	0.00865724	0.0194886	NW_011933693.1	1213506	1215224	+	probable cytochrome P450 4aa1
LOC105430886	146.085	-1.3667	0.234868	-5.81902	5.91939e-09	4.25556e-08	NW_011933725.1	1005680	1053540	+	calcium/calmodulin-dependent protein kinase kinase 2, transcript variant X1
LOC105432517	2620.33	-1.36941	0.153027	-8.94885	3.59216e-19	8.52429e-18	NW_011933763.1	1429724	1521013	-	protein tincar
LOC105429378	75.425	-1.36971	0.243716	-5.62013	1.90816e-08	1.27784e-07	NW_011933702.1	1126315	1129248	+	transcriptional regulator ATRX-like
LOC105423289	158.793	-1.37047	0.231043	-5.93166	2.9988e-09	2.24185e-08	NW_011933457.1	653808	655296	-	NADH-cytochrome b5 reductase-like
LOC105431151	156.708	-1.37313	0.33667	-4.07857	4.53132e-05	0.000170941	NW_011933732.1	245971	249440	+	elongation of very long chain fatty acids protein 7
LOC105423409	62.1878	-1.37385	0.257638	-5.33246	9.68917e-08	5.76912e-07	NW_011933465.1	506990	522470	-	ATP-binding cassette sub-family A member 5-like
LOC105428585	98.0791	-1.37892	0.593181	-2.32462	0.0200921	0.0411335	NW_011933691.1	66783	68853	-	mitochondrial basic amino acids transporter-like
LOC105424304	11.4345	-1.37951	0.581289	-2.37319	0.0176351	0.0366613	NW_011933558.1	99726	103907	+	twitchin
LOC105425744	13.0028	-1.3841	0.500247	-2.76683	0.00566042	0.013424	NW_011933605.1	1665745	1680377	-	LIM/homeobox protein Awh-like, transcript variant X2
LOC105432748	29.3069	-1.38429	0.515633	-2.68465	0.00726062	0.0167231	NW_011933765.1	191707	193909	+	uncharacterized LOC105432748
LOC105428160	85.1052	-1.38454	0.41759	-3.31555	0.000914631	0.00269281	NW_011933681.1	531103	532246	-	5-formyltetrahydrofolate cyclo-ligase
LOC105422146	668.631	-1.38476	0.231818	-5.97345	2.32281e-09	1.75949e-08	NW_011933366.1	273762	281645	-	UDP-glucuronosyltransferase 1-9-like, transcript variant X3
LOC105430779	6700.36	-1.38775	0.174689	-7.94415	1.95519e-15	3.15423e-14	NW_011933723.1	541917	544894	+	6-phosphogluconate dehydrogenase, decarboxylating
LOC105429133	213.403	-1.3889	0.229557	-6.05033	1.44545e-09	1.12854e-08	NW_011933698.1	206664	227911	-	innexin shaking-B, transcript variant X1
LOC105425766	346.877	-1.39073	0.328304	-4.23609	2.27442e-05	9.10881e-05	NW_011933607.1	542373	553598	+	protein tipE
LOC105431923	11214.6	-1.39079	0.125539	-11.0785	1.59437e-28	8.17774e-27	NW_011933754.1	378994	444857	-	uncharacterized LOC105431923
LOC105425851	2507.65	-1.39137	0.128925	-10.792	3.75395e-27	1.71751e-25	NW_011933611.1	511382	521930	-	uncharacterized MFS-type transporter C09D4.1, transcript variant X1
LOC105422263	1293.74	-1.39146	0.180594	-7.70492	1.30927e-14	1.91501e-13	NW_011933377.1	614438	918119	+	Krueppel-like factor 6
LOC105431233	484.63	-1.39224	0.148243	-9.39165	5.90673e-21	1.68482e-19	NW_011933734.1	179235	188424	+	probable cation-transporting ATPase 13A3
LOC105434046	27.4766	-1.39411	0.411608	-3.387	0.000706619	0.00211911	NW_011930675.1	126	1097	+	alpha-tocopherol transfer protein-like
LOC105431065	1461.29	-1.39796	0.190377	-7.34312	2.08667e-13	2.61991e-12	NW_011933727.1	76607	106151	-	scavenger receptor class B member 1
LOC105425367	1157.9	-1.39803	0.497366	-2.81086	0.00494089	0.0118927	NW_011933593.1	66567	72785	-	alanine--glyoxylate aminotransferase 2-like
LOC105430011	70.811	-1.402	0.378028	-3.70872	0.000208314	0.000692442	NW_011933716.1	369104	371286	+	uncharacterized LOC105430011
LOC105432738	11116.8	-1.40212	0.132255	-10.6016	2.92855e-26	1.2315e-24	NW_011933765.1	870405	875969	+	proton-coupled amino acid transporter-like protein pathetic
LOC105433055	127.976	-1.40295	0.409665	-3.42463	0.000615633	0.00186963	NW_011933767.1	1472587	1485194	-	open rectifier potassium channel protein 1, transcript variant X1
LOC105423460	21.7978	-1.40844	0.468422	-3.00677	0.0026404	0.00687633	NW_011933471.1	53854	57789	-	uncharacterized LOC105423460
LOC105431823	456.894	-1.40955	0.157393	-8.95564	3.37769e-19	8.08244e-18	NW_011933303.1	371737	411100	+	ryanodine receptor, transcript variant X7
LOC105427605	2471.36	-1.41099	0.185915	-7.5894	3.21389e-14	4.47673e-13	NW_011933669.1	930564	953393	-	tricalbin-1-like, transcript variant X5
LOC105431310	170.309	-1.41407	0.302863	-4.66902	3.02634e-06	1.43871e-05	NW_011933736.1	26760	31022	+	uncharacterized LOC105431310, transcript variant X2
LOC105428442	1198.82	-1.41583	0.260069	-5.44406	5.20808e-08	3.25164e-07	NW_011933686.1	1478834	1484652	+	retinal dehydrogenase 1
LOC105433920	52.542	-1.42081	0.340107	-4.17754	2.94676e-05	0.000115468	NW_011933337.1	730412	734683	-	uncharacterized LOC105433920
LOC105434192	552.717	-1.42181	0.203835	-6.97529	3.05233e-12	3.34092e-11	NW_011933347.1	21388	43104	-	diacylglycerol kinase theta, transcript variant X7
LOC105425977	61.3652	-1.42207	0.376309	-3.77899	0.000157468	0.000533191	NW_011933614.1	403908	405354	-	uncharacterized LOC105425977
LOC105431935	49.5234	-1.42584	0.285509	-4.99404	5.91303e-07	3.12972e-06	NW_011933754.1	711270	714019	-	dynein regulatory complex subunit 4
LOC105430561	29.0694	-1.42678	0.456125	-3.12805	0.0017597	0.00480826	NW_011933718.1	1935890	1974442	+	retinal guanylyl cyclase 2
LOC105427958	323.083	-1.43333	0.207734	-6.8998	5.20745e-12	5.53044e-11	NW_011933674.1	1142758	1155235	-	uncharacterized LOC105427958, transcript variant X4
LOC105429363	13406.2	-1.4351	0.165435	-8.67468	4.14729e-18	8.81723e-17	NW_011933702.1	922244	1030315	-	RNA pseudouridylate synthase domain-containing protein 2-like
LOC105426883	1146.78	-1.43548	0.199619	-7.1911	6.42728e-13	7.706e-12	NW_011933643.1	478533	496528	-	uncharacterized LOC105426883, transcript variant X2
LOC105428560	228.337	-1.43588	0.171884	-8.35378	6.611e-17	1.25818e-15	NW_011933687.1	1002074	1033863	-	unconventional myosin-VIIb
LOC105423594	51.6524	-1.43693	0.347491	-4.13517	3.54688e-05	0.000136505	NW_011933502.1	653521	658197	+	proclotting enzyme
LOC105429934	30.9736	-1.43722	0.509169	-2.82267	0.00476258	0.0115241	NW_011933713.1	410354	413794	-	protein snakeskin
LOC105429801	13.8443	-1.43761	0.531637	-2.70413	0.00684841	0.0159082	NW_011933711.1	99532	158031	+	receptor-type tyrosine-protein phosphatase kappa
LOC105425253	83.9422	-1.43943	0.583915	-2.46514	0.0136959	0.029325	NW_011933210.1	92624	104984	-	adenylate cyclase type 8, transcript variant X4
LOC105429992	564.043	-1.43948	0.304617	-4.72553	2.2952e-06	1.11286e-05	NW_011933715.1	400333	403830	+	peroxiredoxin-6-like
LOC105431954	24.5688	-1.44107	0.478464	-3.01186	0.00259651	0.00678365	NW_011933755.1	331801	416571	+	uncharacterized LOC105431954
LOC105427084	12269	-1.44149	0.0982553	-14.6709	9.90393e-49	1.5518e-46	NW_011933651.1	222027	248433	+	moesin/ezrin/radixin homolog 1, transcript variant X4
LOC105424551	222.307	-1.44159	0.246536	-5.84739	4.99336e-09	3.62399e-08	NW_011933571.1	466061	481597	-	hemocytin
LOC105431359	8710.3	-1.44261	0.100591	-14.3413	1.20749e-46	1.72641e-44	NW_011933738.1	485465	487402	+	V-type proton ATPase subunit G
LOC105430221	9318.42	-1.44365	0.101007	-14.2925	2.4367e-46	3.31797e-44	NW_011933275.1	37141	53012	+	V-type proton ATPase 116 kDa subunit a, transcript variant X1
LOC105425674	3225.01	-1.44631	0.15759	-9.17768	4.40486e-20	1.15949e-18	NW_011933213.1	166909	170570	+	ero1-like protein
LOC105431036	32353.8	-1.44742	0.0841069	-17.2093	2.26163e-66	8.62282e-64	NW_011933295.1	225898	238345	-	thymosin beta, transcript variant X1
LOC105432814	40.5252	-1.44789	0.36627	-3.95308	7.71532e-05	0.00027805	NW_011933766.1	528509	530637	-	uncharacterized LOC105432814
LOC105428829	11.0006	-1.44864	0.604522	-2.39635	0.0165594	0.034728	NW_011933695.1	758851	761626	+	uncharacterized LOC105428829, transcript variant X1
LOC105428587	22.1365	-1.44914	0.484557	-2.99066	0.00278376	0.00720052	NW_011933692.1	69897	72621	-	histamine H2 receptor, transcript variant X2
LOC105432220	135.928	-1.45073	0.267682	-5.41962	5.97251e-08	3.67277e-07	NW_011933760.1	325618	351920	-	ankyrin-2-like
LOC112552893	505.02	-1.45194	0.212222	-6.84159	7.83201e-12	8.16614e-11	NW_011933727.1	71715	77791	-	uncharacterized LOC112552893
LOC105430200	15836.3	-1.4527	0.164024	-8.85663	8.24729e-19	1.8754e-17	NW_011933717.1	943666	968370	+	uncharacterized LOC105430200
LOC105425263	5823.81	-1.45438	0.158413	-9.18095	4.27296e-20	1.13397e-18	NW_011933590.1	756921	773307	-	2-oxoglutarate dehydrogenase, mitochondrial
LOC105425124	1176.87	-1.45452	0.149711	-9.71548	2.59016e-22	8.27548e-21	NW_011933588.1	54786	64394	+	zinc finger protein castor homolog 1-like
LOC105429368	6624.24	-1.45588	0.133696	-10.8894	1.29449e-27	6.14373e-26	NW_011933702.1	1090579	1093178	+	phosphoglycerate kinase
LOC105422514	299.408	-1.45647	0.214437	-6.79205	1.1055e-11	1.13711e-10	NW_011933404.1	798200	808391	-	electron transfer flavoprotein beta subunit lysine methyltransferase-like, transcript variant X2
LOC105424637	2334.73	-1.45672	0.194111	-7.50458	6.16264e-14	8.28299e-13	NW_011933573.1	394810	398273	+	acyl-CoA-binding protein homolog, transcript variant X2
LOC112552832	38.9572	-1.4585	0.355096	-4.10735	4.00217e-05	0.000152691	NW_011933712.1	1697317	1699014	-	uncharacterized LOC112552832
LOC105427915	25.8824	-1.45867	0.528193	-2.76161	0.00575164	0.0136149	NW_011933674.1	788704	806883	+	laminin subunit beta-1, transcript variant X2
LOC112553093	110.071	-1.45882	0.261032	-5.58867	2.28812e-08	1.51543e-07	NW_011933340.1	267006	268635	-	uncharacterized LOC112553093
LOC105432340	23.6161	-1.45921	0.423419	-3.44626	0.000568406	0.00174114	NW_011933762.1	96117	99441	+	vascular endothelial growth factor receptor 3
LOC105429656	2298.76	-1.46508	0.154045	-9.51071	1.89365e-21	5.68492e-20	NW_011933268.1	352611	357438	+	phospholipase A2-like
LOC105422883	6304.9	-1.46604	0.14614	-10.0317	1.10576e-23	3.87965e-22	NW_011933420.1	1640231	1736705	-	diacylglycerol O-acyltransferase 1
LOC112552548	37.529	-1.46787	0.438275	-3.3492	0.00081046	0.00240718	NW_011933226.1	47929	51225	-	uncharacterized LOC112552548
LOC105424726	260.904	-1.47075	0.161286	-9.11887	7.59119e-20	1.95559e-18	NW_011933575.1	510951	515541	+	modular serine protease-like
LOC105428944	42.2234	-1.4715	0.485065	-3.03361	0.00241649	0.00636715	NW_011933695.1	2583578	2625796	-	uncharacterized LOC105428944, transcript variant X3
LOC105425269	38.0985	-1.47161	0.323257	-4.55245	5.30241e-06	2.41149e-05	NW_011933590.1	1105477	1204950	-	pro-neuregulin-2, membrane-bound isoform
LOC105433840	212.438	-1.47315	0.399677	-3.68586	0.000227931	0.000751535	NW_011933336.1	84079	86523	-	phospholipase A1-like
LOC105423445	28.3023	-1.47318	0.46089	-3.19638	0.00139164	0.00391883	NW_011933468.1	25336	35589	-	ammonium transporter Rh type A
LOC105427986	49.3105	-1.47673	0.372101	-3.96864	7.22846e-05	0.000261809	NW_011933675.1	40099	308353	-	uncharacterized LOC105427986
LOC105428141	2553.42	-1.47871	0.128051	-11.5478	7.56934e-31	4.55674e-29	NW_011933681.1	357498	371133	+	diacylglycerol kinase eta
LOC105424640	14.5379	-1.47976	0.618339	-2.39312	0.0167058	0.0350029	NW_011933573.1	491426	506282	-	uncharacterized LOC105424640
LOC105423247	6611.84	-1.48428	0.109485	-13.557	7.20688e-42	7.70395e-40	NW_011933455.1	807374	817712	-	V-type proton ATPase subunit C, transcript variant X1
LOC105433710	99.5598	-1.48992	0.263457	-5.65526	1.5561e-08	1.05318e-07	NW_011933330.1	243615	252761	+	alpha-tocopherol transfer protein-like, transcript variant X3
LOC105430861	15332.9	-1.49	0.125088	-11.9117	1.02888e-32	7.00493e-31	NW_011933725.1	640639	659833	-	arginine kinase, transcript variant X1
LOC105425104	1847.65	-1.49061	0.231115	-6.44963	1.12126e-10	1.01464e-09	NW_011933586.1	358386	376685	-	aquaporin AQPAe.a-like, transcript variant X1
LOC105426451	187.39	-1.49153	0.220336	-6.76933	1.29376e-11	1.31304e-10	NW_011933631.1	50519	63740	+	S-adenosylmethionine decarboxylase proenzyme, transcript variant X1
LOC112552237	40.5298	-1.49189	0.482368	-3.09285	0.00198247	0.00533667	NW_011933378.1	148055	150425	+	zinc finger protein 474-like
LOC105424130	674.786	-1.49237	0.199167	-7.49307	6.72831e-14	9.00098e-13	NW_011933550.1	466313	471911	+	Krueppel homolog 1
LOC105433949	258.788	-1.49319	0.248019	-6.02049	1.73888e-09	1.33755e-08	NW_011933338.1	120006	190186	-	nephrin-like
LOC112552668	215.981	-1.49464	0.221511	-6.74748	1.50434e-11	1.51334e-10	NW_011933668.1	11586	14993	-	GATA zinc finger domain-containing protein 10-like
LOC105428898	365.205	-1.49557	0.314637	-4.75333	2.00097e-06	9.76827e-06	NW_011933695.1	1954041	1961167	-	uncharacterized LOC105428898
LOC105429131	303.683	-1.49572	0.211115	-7.08488	1.39168e-12	1.5934e-11	NW_011933698.1	142590	166956	-	GTPase-activating Rap/Ran-GAP domain-like protein 3, transcript variant X2
LOC105422097	1109.43	-1.49609	0.129014	-11.5964	4.30027e-31	2.65873e-29	NW_011933358.1	200123	204909	+	toll-like receptor 7
LOC105425098	584.856	-1.49623	0.227485	-6.57728	4.79148e-11	4.53683e-10	NW_011933586.1	156665	168557	-	facilitated trehalose transporter Tret1, transcript variant X2
LOC105429244	37.4892	-1.49769	0.451198	-3.31935	0.000902262	0.00265913	NW_011933699.1	1582769	1595696	+	uncharacterized LOC105429244
LOC105427595	26.4133	-1.49781	0.560789	-2.67089	0.00756498	0.0173264	NW_011933669.1	766718	780833	-	uncharacterized LOC105427595, transcript variant X2
LOC105425823	23.3491	-1.49812	0.569908	-2.62871	0.00857088	0.019336	NW_011933610.1	3643	4996	+	uncharacterized LOC105425823
LOC105426901	32.7977	-1.50003	0.469462	-3.19522	0.00139726	0.00393254	NW_011933645.1	81084	87127	-	acetylcholine receptor subunit beta-like 2, transcript variant X1
LOC105424298	27.4374	-1.50133	0.552998	-2.71488	0.00662988	0.0154464	NW_011933558.1	341859	347935	+	GATA-binding factor A-like
LOC112552323	145.662	-1.50152	0.302954	-4.95624	7.18687e-07	3.76734e-06	NW_011933442.1	128941	130143	+	uncharacterized LOC112552323
LOC105430267	227	-1.50241	0.197128	-7.62148	2.50784e-14	3.52392e-13	NW_011933717.1	1911721	2000135	-	discoidin domain-containing receptor 2-like
LOC105429082	283.391	-1.50494	0.231673	-6.49595	8.25112e-11	7.59874e-10	NW_011933697.1	1477664	1490864	+	serine/arginine repetitive matrix protein 2, transcript variant X1
LOC105427433	3427.38	-1.50607	0.145792	-10.3303	5.14213e-25	2.00053e-23	NW_011933667.1	450087	465941	-	uncharacterized peptidase C1-like protein F26E4.3, transcript variant X1
LOC105432592	117.071	-1.50689	0.210002	-7.1756	7.19933e-13	8.58665e-12	NW_011933764.1	1521728	1524410	+	myrosinase 1
LOC105433652	16.9612	-1.50701	0.553793	-2.72125	0.00650347	0.0151903	NW_011930217.1	79720	80806	+	potassium voltage-gated channel protein Shab-like
LOC105429726	24.6197	-1.50803	0.502158	-3.00309	0.00267249	0.00694885	NW_011933709.1	668516	682338	-	dynein heavy chain 7, axonemal-like
LOC105432563	76.7359	-1.50913	0.353344	-4.27098	1.94612e-05	7.87975e-05	NW_011933764.1	930584	947561	+	LIRP-like, transcript variant X1
LOC105422978	443.952	-1.50915	0.166905	-9.04197	1.53878e-19	3.80965e-18	NW_011933425.1	153587	159414	-	serine protease gd-like
LOC105431025	6723.84	-1.51015	0.144564	-10.4462	1.52448e-25	6.18333e-24	NW_011933727.1	246518	256854	-	glycogen debranching enzyme, transcript variant X7
LOC105431567	1631.9	-1.51059	0.131485	-11.4887	1.50336e-30	8.7732e-29	NW_011933745.1	646531	655691	-	calcium-binding mitochondrial carrier protein SCaMC-2, transcript variant X1
LOC105425554	28.8221	-1.51061	0.409702	-3.6871	0.000226824	0.000748317	NW_011933598.1	50769	55307	-	uncharacterized LOC105425554
LOC105423680	285.887	-1.51158	0.1654	-9.13892	6.30779e-20	1.63602e-18	NW_011933507.1	720669	753558	+	UNC93-like protein
LOC105425627	534.669	-1.51294	0.51287	-2.94995	0.0031783	0.00807314	NW_011933600.1	808801	810789	-	ejaculatory bulb-specific protein 3-like
LOC105427904	5824.58	-1.51599	0.489627	-3.09621	0.00196012	0.00528395	NW_011933674.1	348035	348827	+	chymotrypsin inhibitor-like
LOC105424989	508.172	-1.51789	0.587672	-2.58288	0.00979785	0.0217396	NW_011933583.1	145659	148092	-	uricase
LOC105422384	13.3357	-1.51878	0.527054	-2.88164	0.00395608	0.00977949	NW_011933381.1	151166	198389	+	Down syndrome cell adhesion molecule-like protein Dscam2
LOC105423584	108.75	-1.52206	0.329387	-4.62087	3.82129e-06	1.78545e-05	NW_011933502.1	177717	180714	-	D-aspartate oxidase
LOC105432727	114.095	-1.5221	0.306614	-4.96424	6.89715e-07	3.62711e-06	NW_011933765.1	774960	779716	+	putative metabolite transport protein HI_1104
LOC105431302	88.6643	-1.5235	0.515523	-2.95526	0.00312405	0.00796585	NW_011933735.1	119040	120576	-	homocysteine S-methyltransferase-like
LOC105426167	8815.59	-1.52466	0.176322	-8.64704	5.28539e-18	1.10925e-16	NW_011933621.1	159721	163490	-	COPII coat assembly protein sec16-like
LOC105432585	393.383	-1.5249	0.16755	-9.10115	8.938e-20	2.2668e-18	NW_011933764.1	1184100	1190265	-	dipeptidase 1-like, transcript variant X2
LOC105431709	324.903	-1.52532	0.19646	-7.76401	8.22884e-15	1.22874e-13	NW_011933748.1	661718	689325	+	guanine nucleotide-binding protein G(o) subunit alpha
LOC105430209	4734.98	-1.52598	0.0951426	-16.0389	6.84035e-58	1.59673e-55	NW_011933275.1	30475	36636	-	renin receptor, transcript variant X1
LOC105431726	40.3479	-1.52658	0.355499	-4.29419	1.75334e-05	7.1675e-05	NW_011933748.1	1013286	1014607	+	uncharacterized LOC105431726
LOC105422151	875.05	-1.52711	0.269196	-5.67286	1.4043e-08	9.55528e-08	NW_011933366.1	162306	172721	+	uncharacterized LOC105422151
LOC105430849	994.497	-1.52788	0.398807	-3.83114	0.000127551	0.000442501	NW_011933725.1	479720	483407	+	armadillo repeat-containing protein 6 homolog
LOC105430271	231.961	-1.52821	0.171395	-8.91631	4.82104e-19	1.1323e-17	NW_011933717.1	2383597	2385488	+	probable weak neurotoxin NNAM3
LOC105432005	41.5678	-1.5324	0.358672	-4.27243	1.93352e-05	7.83686e-05	NW_011933757.1	1400714	1425574	-	head-specific guanylate cyclase, transcript variant X1
LOC105429835	185.092	-1.53333	0.314984	-4.86796	1.12758e-06	5.70423e-06	NW_011933268.1	471879	507894	+	ELKS/Rab6-interacting/CAST family member 1-like
LOC105430158	713.52	-1.53396	0.48255	-3.17887	0.0014785	0.00412869	NW_011933717.1	245627	247333	-	uncharacterized LOC105430158, transcript variant X5
LOC105432734	156.313	-1.5343	0.279967	-5.48028	4.24643e-08	2.69271e-07	NW_011933765.1	832144	842177	+	serine-rich adhesin for platelets, transcript variant X1
LOC105425062	26.5979	-1.53624	0.498268	-3.08316	0.00204818	0.00549544	NW_011933584.1	65596	68118	-	uncharacterized LOC105425062
LOC105430498	3104.6	-1.53793	0.189964	-8.09591	5.68375e-16	9.7176e-15	NW_011933718.1	2606481	2622117	-	solute carrier family 22 member 5-like, transcript variant X2
LOC105434174	40.4416	-1.53957	0.346603	-4.44189	8.91727e-06	3.87817e-05	NW_011933344.1	92134	149471	-	small conductance calcium-activated potassium channel protein-like
LOC105424699	58.1781	-1.54217	0.39727	-3.88193	0.000103632	0.000365171	NW_011933575.1	156087	169517	+	Kv channel-interacting protein 2-like, transcript variant X1
LOC105428876	86.5107	-1.54686	0.389464	-3.97176	7.13422e-05	0.000258887	NW_011933695.1	1645161	1647050	+	uncharacterized LOC105428876
LOC105424962	105.271	-1.54741	0.412196	-3.75406	0.000173991	0.000585155	NW_011933582.1	70428	73143	-	cytochrome P450 9e2-like
LOC112552749	17.9791	-1.54812	0.483943	-3.19898	0.00137917	0.0038897	NW_011933694.1	732234	831496	+	uncharacterized LOC112552749
LOC105425368	41.9946	-1.54853	0.409319	-3.78318	0.000154837	0.000525372	NW_011933593.1	120311	122278	+	uncharacterized LOC105425368
LOC105427823	98.1592	-1.54953	0.374325	-4.13953	3.48015e-05	0.000134117	NW_011933671.1	1359398	1370040	-	adenylate cyclase type 3
LOC105422904	25.3874	-1.55115	0.408807	-3.79432	0.000148047	0.000505465	NW_011933420.1	2250743	2252220	-	uncharacterized LOC105422904
LOC112552899	34.1741	-1.55144	0.378838	-4.09525	4.21707e-05	0.000160142	NW_011933298.1	31835	155191	+	uncharacterized LOC112552899
LOC105430407	80.6283	-1.55185	0.347517	-4.46553	7.98693e-06	3.5042e-05	NW_011933288.1	69649	72550	+	lysocardiolipin acyltransferase 1-like
LOC105427146	11.2102	-1.55559	0.576715	-2.69733	0.00698985	0.016194	NW_011933652.1	216865	217726	-	uncharacterized LOC105427146
LOC105422610	104.444	-1.55865	0.25942	-6.0082	1.87589e-09	1.43906e-08	NW_011933406.1	1140540	1175595	-	follistatin-related protein 5-like, transcript variant X4
LOC105425533	499.992	-1.56143	0.152856	-10.215	1.69833e-24	6.32753e-23	NW_011933597.1	518799	535816	-	androgen-induced gene 1 protein-like, transcript variant X2
LOC105424940	44.8242	-1.56393	0.333917	-4.68359	2.81889e-06	1.34624e-05	NW_011933578.1	65010	99092	+	uncharacterized LOC105424940
LOC105430092	6323.97	-1.56522	0.0939935	-16.6524	2.90478e-62	9.49282e-60	NW_011933716.1	1408893	1411146	+	uncharacterized LOC105430092
LOC105433196	44.7061	-1.56607	0.386377	-4.05321	5.05199e-05	0.0001889	NW_011933770.1	648397	731358	+	mushroom body large-type Kenyon cell-specific protein 1-like
LOC105434007	401.905	-1.56806	0.206971	-7.57623	3.55754e-14	4.93226e-13	NW_011933339.1	413490	414711	-	golgin subfamily A member 6-like protein 1
LOC105427150	1048.79	-1.56902	0.15337	-10.2303	1.45039e-24	5.43919e-23	NW_011933652.1	237260	253568	+	carbonic anhydrase 2
LOC105434235	11.3451	-1.57069	0.625838	-2.50974	0.012082	0.0262678	NW_011933351.1	307606	322461	-	trichohyalin-like
LOC105431032	31.1557	-1.57303	0.494281	-3.18246	0.0014603	0.00408533	NW_011933727.1	385966	476351	+	cationic amino acid transporter 2, transcript variant X1
LOC105426733	997.396	-1.57388	0.146545	-10.7399	6.61177e-27	2.96033e-25	NW_011933636.1	483147	511778	-	uncharacterized LOC105426733
LOC105430116	17.4174	-1.57401	0.466517	-3.37396	0.000740948	0.00221278	NW_011933716.1	1752057	1754445	-	uncharacterized LOC105430116
LOC105432987	472.777	-1.57844	0.240854	-6.55353	5.61938e-11	5.29443e-10	NW_011933767.1	742725	778521	+	nephrin-like
LOC105430432	92.9651	-1.57954	0.346419	-4.55961	5.12478e-06	2.33907e-05	NW_011933718.1	1257042	1264271	-	putative ATP-dependent RNA helicase DHX57, transcript variant X2
LOC105425825	95.3793	-1.58192	0.505591	-3.12886	0.00175486	0.00479736	NW_011933214.1	64933	70782	+	fatty acyl-CoA reductase 1
LOC105433422	56.7835	-1.58446	0.350332	-4.52273	6.10468e-06	2.73396e-05	NW_011933313.1	117628	121087	+	uncharacterized LOC105433422
LOC105429942	40.3343	-1.58456	0.444597	-3.56403	0.000365201	0.00115711	NW_011933713.1	25061	188614	+	uncharacterized LOC105429942
LOC105426499	1234.87	-1.58618	0.177152	-8.95378	3.43503e-19	8.20248e-18	NW_011933632.1	57788	67535	-	zinc finger and SCAN domain-containing protein 10-like, transcript variant X3
LOC105422856	6407.5	-1.58734	0.112137	-14.1553	1.7308e-45	2.22437e-43	NW_011933420.1	837002	993205	-	tensin-1, transcript variant X5
LOC105422210	38.5153	-1.58925	0.374439	-4.24435	2.19224e-05	8.81223e-05	NW_011933373.1	142856	144616	+	uncharacterized LOC105422210
LOC112552279	15.5226	-1.58962	0.654885	-2.42733	0.0152104	0.0322079	NW_011933411.1	281418	281566	+	U12 minor spliceosomal RNA
LOC105432971	30.1515	-1.59037	0.372667	-4.26753	1.97652e-05	7.99133e-05	NW_011933767.1	241329	249062	+	uncharacterized LOC105432971, transcript variant X4
LOC105422148	585.805	-1.59178	0.562136	-2.83166	0.00463073	0.0112288	NW_011933366.1	395	2220	+	fatty acid synthase-like
LOC105423704	617.636	-1.59201	0.238964	-6.66215	2.69844e-11	2.62679e-10	NW_011933510.1	109398	113803	+	cytochrome P450 18a1
LOC112552511	21.5888	-1.5924	0.546215	-2.91533	0.00355309	0.00889867	NW_011933607.1	539562	542363	+	probable calcium-binding protein CML30
LOC105430478	15126.3	-1.59244	0.203101	-7.84064	4.48261e-15	6.91931e-14	NW_011933718.1	2130300	2131987	+	ejaculatory bulb-specific protein 3-like, transcript variant X2
LOC105432020	9972.78	-1.59261	0.180784	-8.80948	1.25729e-18	2.81425e-17	NW_011933757.1	1839828	1853021	+	uncharacterized LOC105432020, transcript variant X1
LOC105433940	1435.07	-1.59404	0.185707	-8.58362	9.19366e-18	1.85462e-16	NW_011930427.1	4342	18789	+	phytanoyl-CoA dioxygenase, peroxisomal-like
LOC105428438	456.854	-1.59503	0.18641	-8.55656	1.16283e-17	2.32526e-16	NW_011933686.1	1417153	1447597	-	tyrosine-protein phosphatase 10D
LOC105431166	29.948	-1.59565	0.413463	-3.85923	0.000113747	0.000397993	NW_011933732.1	479697	482659	+	uncharacterized LOC105431166
LOC105425115	5428.71	-1.59703	0.403999	-3.95306	7.71577e-05	0.00027805	NW_011933586.1	387316	391836	-	serine protease inhibitor dipetalogastin-like
LOC105433761	94.496	-1.59737	0.346464	-4.6105	4.0171e-06	1.86627e-05	NW_011933330.1	356621	358525	+	uncharacterized LOC105433761
LOC105428320	912.603	-1.60024	0.608964	-2.62781	0.00859359	0.0193796	NW_011933684.1	808836	813743	+	glycine, alanine and asparagine-rich protein
LOC105425522	5102.42	-1.60095	0.213786	-7.48855	6.96366e-14	9.28326e-13	NW_011933597.1	446033	453551	+	nose resistant to fluoxetine protein 6
LOC105424661	447.61	-1.60241	0.193717	-8.27189	1.31855e-16	2.40536e-15	NW_011933573.1	400123	405749	-	high affinity cationic amino acid transporter 1-like
LOC105424178	66.6653	-1.60299	0.513649	-3.12078	0.00180373	0.00491216	NW_011933551.1	430022	438369	+	solute carrier family 23 member 1
LOC105424264	10.5267	-1.60358	0.588827	-2.72336	0.00646225	0.0151187	NW_011933557.1	672331	685958	-	glucose dehydrogenase [FAD, quinone]
LOC105433193	28.4768	-1.60687	0.544371	-2.95179	0.00315939	0.00803939	NW_011933770.1	395208	468678	+	atrial natriuretic peptide receptor 1
LOC105430549	65.6098	-1.60747	0.583257	-2.75602	0.00585091	0.0138184	NW_011933718.1	900218	915403	-	solute carrier family 26 member 6-like
LOC105426208	18.3115	-1.60748	0.554709	-2.89788	0.00375696	0.0093438	NW_011933621.1	464347	467069	-	uncharacterized LOC105426208
LOC105423795	47.3153	-1.61104	0.436044	-3.69467	0.000220174	0.000728689	NW_011933523.1	107297	208631	+	fez family zinc finger protein erm-like
LOC105423033	60.6239	-1.61249	0.294332	-5.47846	4.29048e-08	2.7143e-07	NW_011933434.1	28325	80851	+	octopamine receptor beta-1R-like, transcript variant X1
LOC105430026	88.3833	-1.61332	0.33661	-4.79285	1.64426e-06	8.09951e-06	NW_011933716.1	610731	626036	+	tubby-related protein 4
LOC105430791	3721.36	-1.61405	0.163783	-9.85477	6.53693e-23	2.19265e-21	NW_011933295.1	72696	83304	+	breast cancer anti-estrogen resistance protein 3, transcript variant X2
LOC105424603	125.4	-1.617	0.510718	-3.16613	0.00154482	0.00428876	NW_011933571.1	530322	543825	+	very long-chain-fatty-acid--CoA ligase bubblegum-like
LOC105428216	28.3192	-1.61802	0.51076	-3.16787	0.00153562	0.00426859	NW_011933682.1	16787	59339	+	cone-rod homeobox protein
LOC105430438	21.6124	-1.61975	0.45777	-3.53835	0.000402642	0.00126418	NW_011933718.1	1223194	1223871	-	uncharacterized LOC105430438
LOC112552838	117.345	-1.62043	0.333725	-4.85559	1.20028e-06	6.04527e-06	NW_011933713.1	32038	35299	+	protein Ycf2-like
LOC105434200	2957.18	-1.62165	0.222625	-7.28421	3.2356e-13	3.98801e-12	NW_011933350.1	225	9588	-	uncharacterized LOC105434200, transcript variant X2
LOC105431156	838.159	-1.62202	0.230819	-7.02724	2.10654e-12	2.36222e-11	NW_011933732.1	340317	348608	+	elongation of very long chain fatty acids protein AAEL008004-like
LOC105423218	13.423	-1.62285	0.634992	-2.5557	0.0105976	0.023351	NW_011933455.1	544949	552867	-	uncharacterized LOC105423218
LOC105423780	10.3367	-1.62387	0.636428	-2.55153	0.0107251	0.0235956	NW_011933516.1	220919	222108	+	uncharacterized LOC105423780
LOC105424963	22.4595	-1.62721	0.679616	-2.39431	0.0166516	0.0349086	NW_011933582.1	59543	61487	+	cytochrome P450 9e2-like
LOC105428415	1121.88	-1.62992	0.142797	-11.4143	3.54929e-30	2.02984e-28	NW_011933686.1	1077663	1080768	-	waprin-Phi2-like, transcript variant X3
LOC105430559	143.968	-1.63108	0.280464	-5.81567	6.03914e-09	4.33348e-08	NW_011933718.1	1888324	1900672	+	uncharacterized LOC105430559
LOC105433666	61.019	-1.6313	0.345408	-4.72282	2.32602e-06	1.1259e-05	NW_011933328.1	229086	230445	+	uncharacterized LOC105433666
LOC105427106	33.1391	-1.63389	0.417026	-3.91796	8.93023e-05	0.0003191	NW_011933651.1	621727	622696	+	uncharacterized LOC105427106
LOC105424218	7309.18	-1.63392	0.138272	-11.8168	3.19792e-32	2.05493e-30	NW_011933555.1	399863	409336	-	ubiquitin carboxyl-terminal hydrolase 47
LOC105434122	85.8512	-1.63821	0.32868	-4.98421	6.22149e-07	3.28539e-06	NW_011933341.1	998202	1005065	-	glutamate [NMDA] receptor subunit 1, transcript variant X3
LOC105432527	188.212	-1.63963	0.731255	-2.24222	0.0249474	0.0498861	NW_011933763.1	2105207	2108968	-	facilitated trehalose transporter Tret1-like
LOC105428892	43.2048	-1.63972	0.40956	-4.0036	6.23864e-05	0.00022871	NW_011933695.1	1859386	1866205	-	uncharacterized LOC105428892
LOC105433570	56.7853	-1.64139	0.561541	-2.92301	0.0034667	0.00870946	NW_011933324.1	47435	49701	+	rhodopsin-like
LOC105430846	440.03	-1.64349	0.149991	-10.9572	6.13695e-28	2.94935e-26	NW_011933725.1	376342	405012	-	uncharacterized LOC105430846
LOC105431478	16707.3	-1.64562	0.18577	-8.85837	8.11901e-19	1.8499e-17	NW_011933743.1	605540	648879	+	IQ motif and SEC7 domain-containing protein 1
LOC105428136	13.2678	-1.64563	0.570257	-2.88576	0.0039047	0.00966499	NW_011933681.1	287195	291845	+	uncharacterized LOC105428136
LOC105428616	3226.63	-1.64566	0.116581	-14.1161	3.02431e-45	3.84356e-43	NW_011933693.1	112570	129882	+	EF-hand domain-containing protein D2 homolog
LOC105430437	194.425	-1.64942	0.236865	-6.96356	3.31788e-12	3.61084e-11	NW_011933718.1	1224256	1228141	-	leucine-rich repeats and immunoglobulin-like domains protein 2, transcript variant X2
LOC105423989	151.139	-1.65544	0.258261	-6.40996	1.45558e-10	1.29867e-09	NW_011933543.1	65139	68581	-	uncharacterized LOC105423989
LOC105425147	69.8636	-1.658	0.525589	-3.15456	0.00160739	0.00444626	NW_011933589.1	304812	336019	+	1-phosphatidylinositol 4,5-bisphosphate phosphodiesterase epsilon-1-like
LOC105433837	68.2055	-1.65908	0.369956	-4.48455	7.30679e-06	3.22808e-05	NW_011930319.1	6	1991	-	phospholipase A1 member A
LOC105427122	157.696	-1.65984	0.337142	-4.92326	8.51161e-07	4.39236e-06	NW_011933651.1	757134	771674	+	uncharacterized LOC105427122, transcript variant X3
LOC105422898	23.9717	-1.66052	0.40018	-4.14944	3.33288e-05	0.00012905	NW_011933420.1	2194366	2206640	-	small lysine-rich protein 1, transcript variant X2
LOC105428934	31.6023	-1.66122	0.703502	-2.36136	0.0182079	0.0377354	NW_011933695.1	2363796	2368089	-	uncharacterized LOC105428934
LOC105428790	502.398	-1.6629	0.177851	-9.34992	8.77116e-21	2.46498e-19	NW_011933694.1	852481	871379	+	lachesin-like
LOC105430086	16840.2	-1.66441	0.0999068	-16.6596	2.57691e-62	8.66902e-60	NW_011933716.1	1226678	1230289	+	V-type proton ATPase subunit B
LOC105426643	37.0169	-1.66579	0.382278	-4.35754	1.31533e-05	5.521e-05	NW_011933635.1	306189	307214	+	uncharacterized LOC105426643
LOC105427526	65.2807	-1.6755	0.431798	-3.88029	0.000104334	0.00036719	NW_011933668.1	14968	58578	-	voltage-dependent calcium channel type D subunit alpha-1
LOC105423171	23.2393	-1.67571	0.520941	-3.21669	0.0012968	0.00368791	NW_011931703.1	2636	2883	-	uncharacterized LOC105423171
LOC105429503	50.334	-1.67808	0.518117	-3.2388	0.00120035	0.00344077	NW_011933704.1	968798	992571	-	leucine-rich repeat and immunoglobulin-like domain-containing nogo receptor-interacting protein 3
LOC105426346	8296.51	-1.68238	0.0901142	-18.6694	8.77876e-78	4.7815e-75	NW_011933624.1	588673	591065	+	V-type proton ATPase subunit E
LOC105429993	87.5035	-1.68272	0.374673	-4.49119	7.08271e-06	3.13636e-05	NW_011933715.1	396444	408960	-	glycerol-3-phosphate dehydrogenase [NAD(+)], cytoplasmic-like
LOC105428683	80210.3	-1.6886	0.138336	-12.2065	2.86906e-34	2.09021e-32	NW_011933693.1	1316178	1319787	+	actin-5C, transcript variant X1
LOC105428578	158.495	-1.68953	0.303451	-5.56772	2.58087e-08	1.69363e-07	NW_011933690.1	158008	211149	+	protein I'm not dead yet-like
LOC105424879	147.395	-1.69053	0.330727	-5.11155	3.19527e-07	1.769e-06	NW_011933577.1	830358	834140	-	peptidyl-alpha-hydroxyglycine alpha-amidating lyase 2
LOC105433187	17.5565	-1.69515	0.563182	-3.00996	0.00261285	0.00682011	NW_011933770.1	98466	100571	-	farnesol dehydrogenase-like, transcript variant X1
LOC105427052	25.8825	-1.69608	0.489281	-3.46647	0.000527346	0.00162538	NW_011933650.1	127632	148296	+	dynein heavy chain 5, axonemal-like
LOC105423306	27.199	-1.70376	0.612506	-2.78162	0.00540876	0.0128913	NW_011933457.1	1313447	1315188	-	leucine-rich repeat-containing protein 15-like
LOC105422508	58.7543	-1.70425	0.295539	-5.76659	8.08925e-09	5.7362e-08	NW_011933404.1	768308	769777	+	uncharacterized LOC105422508
LOC112552802	190.968	-1.70427	0.244203	-6.97889	2.97524e-12	3.25966e-11	NW_011933268.1	511735	522124	+	ELKS/Rab6-interacting/CAST family member 1-like
LOC105422191	11.1942	-1.70712	0.673439	-2.53492	0.0112472	0.0246258	NW_011933373.1	53163	53511	+	uncharacterized LOC105422191
LOC112552795	185.132	-1.70859	0.460133	-3.71326	0.000204609	0.000680918	NW_011933704.1	94280	96562	-	uncharacterized LOC112552795
LOC105432936	276.625	-1.71258	0.244207	-7.01284	2.33526e-12	2.59328e-11	NW_011933766.1	1739693	1771260	-	serine proteinase stubble, transcript variant X2
LOC105423044	39.1823	-1.71861	0.415141	-4.13982	3.47584e-05	0.000133996	NW_011931664.1	54813	56803	+	uncharacterized LOC105423044
LOC105432317	79.6685	-1.71904	0.396776	-4.33253	1.47406e-05	6.11545e-05	NW_011933761.1	2754583	2860691	+	uncharacterized LOC105432317, transcript variant X1
LOC105427402	2092.62	-1.71979	0.186855	-9.20385	3.45365e-20	9.22963e-19	NW_011933667.1	81200	94455	-	organic cation transporter 1-like
LOC105427200	248.618	-1.7199	0.311653	-5.51862	3.4168e-08	2.19435e-07	NW_011933653.1	543465	565632	-	growth/differentiation factor 11
LOC105425929	106.406	-1.7214	0.337872	-5.09484	3.49034e-07	1.92212e-06	NW_011933214.1	165571	182576	+	43 kDa receptor-associated protein of the synapse homolog
LOC105430455	37.8821	-1.72361	0.458854	-3.75633	0.000172425	0.00058057	NW_011933718.1	1980591	1982385	-	uncharacterized LOC105430455, transcript variant X1
LOC105430378	128.387	-1.72896	0.238678	-7.24393	4.35865e-13	5.30364e-12	NW_011933718.1	752057	758706	-	protein FAM69C, transcript variant X1
LOC105425834	161.639	-1.72898	0.309463	-5.58702	2.31003e-08	1.52906e-07	NW_011933611.1	413892	431462	+	diuretic hormone class 2
LOC105430109	3916.48	-1.7306	0.197359	-8.76877	1.80632e-18	3.96558e-17	NW_011933716.1	1557649	1581107	-	protein phosphatase 1 regulatory subunit 3C, transcript variant X4
LOC105426637	3106.73	-1.7312	0.121332	-14.2683	3.44861e-46	4.64062e-44	NW_011933635.1	260656	262630	+	V-type proton ATPase subunit d
LOC105428386	841.689	-1.73181	0.206107	-8.40248	4.37161e-17	8.44637e-16	NW_011933686.1	563391	569166	+	regucalcin-like, transcript variant X1
LOC105428254	1669.09	-1.73387	0.223574	-7.75524	8.81787e-15	1.31156e-13	NW_011933682.1	782693	789409	-	Usher syndrome type-1G protein homolog, transcript variant X1
LOC105424694	968.47	-1.73457	0.149265	-11.6208	3.23259e-31	2.00948e-29	NW_011933575.1	7832	26833	+	tyrosine kinase receptor Cad96Ca
LOC105433188	545.983	-1.73528	0.196319	-8.83911	9.64828e-19	2.18097e-17	NW_011933770.1	103109	129308	-	MAP kinase-activating death domain protein
LOC105431024	7135.05	-1.73532	0.156571	-11.0833	1.51201e-28	7.79023e-27	NW_011933727.1	257279	266697	+	proteasome adapter and scaffold protein ECM29
LOC105428407	16360.6	-1.73613	0.105231	-16.4983	3.77233e-61	1.0787e-58	NW_011933686.1	1030859	1036328	-	V-type proton ATPase catalytic subunit A
LOC105422178	51.725	-1.73659	0.416017	-4.17432	2.98876e-05	0.000116873	NW_011933367.1	323070	352170	-	neuroendocrine convertase 1-like
LOC105424208	993.585	-1.73939	0.394862	-4.40507	1.05749e-05	4.52341e-05	NW_011933555.1	306277	315292	-	titin, transcript variant X1
LOC105430989	712.716	-1.74207	0.729553	-2.38786	0.0169469	0.0354367	NW_011933725.1	2807494	2822375	+	uncharacterized LOC105430989
LOC112553088	150.987	-1.7423	0.224072	-7.77561	7.50825e-15	1.12703e-13	NW_011933339.1	576681	590581	+	uncharacterized LOC112553088
LOC105427342	37.8808	-1.74373	0.471576	-3.69766	0.000217596	0.000720782	NW_011933238.1	178022	180962	+	putative malate dehydrogenase 1B
LOC105424923	25.1856	-1.74715	0.428986	-4.07274	4.64632e-05	0.000174875	NW_011933577.1	835004	836430	-	uncharacterized LOC105424923
LOC105428533	1869.85	-1.7521	0.229631	-7.63006	2.34642e-14	3.31743e-13	NW_011933687.1	496855	516939	+	D-beta-hydroxybutyrate dehydrogenase, mitochondrial
LOC105423718	215.591	-1.75349	0.374847	-4.67788	2.89861e-06	1.3797e-05	NW_011933512.1	151267	152978	-	uncharacterized LOC105423718
LOC105424654	14.153	-1.75714	0.601206	-2.92269	0.00347018	0.00871391	NW_011933573.1	92526	93564	+	integrator complex subunit 12-like
LOC105425282	27.2193	-1.75877	0.591845	-2.97166	0.00296191	0.00760456	NW_011933591.1	701872	717411	+	uncharacterized LOC105425282
LOC105427765	29.3707	-1.75961	0.573654	-3.06737	0.00215951	0.00575635	NW_011933670.1	1140486	1146278	-	adenosine receptor A2b-like, transcript variant X1
LOC105429064	159.605	-1.75968	0.284787	-6.17894	6.45329e-10	5.27988e-09	NW_011933697.1	625890	630466	+	tetraspanin-11-like, transcript variant X5
LOC105422299	211.083	-1.76404	0.361078	-4.88547	1.03185e-06	5.25713e-06	NW_011931218.1	21443	25388	+	pyridoxine/pyridoxamine 5'-phosphate oxidase, transcript variant X4
LOC105430571	134.273	-1.76795	0.365843	-4.83253	1.34806e-06	6.72148e-06	NW_011933718.1	2712936	2735994	-	uncharacterized LOC105430571
LOC112553047	51.5937	-1.76981	0.286474	-6.1779	6.49591e-10	5.31095e-09	NW_011933313.1	91101	92917	+	uncharacterized LOC112553047
LOC105433256	1217.44	-1.77248	0.163232	-10.8586	1.81431e-27	8.50497e-26	NW_011933308.1	306050	323920	-	monocarboxylate transporter 12, transcript variant X2
LOC105431679	181.464	-1.77276	0.304598	-5.82001	5.88454e-09	4.23317e-08	NW_011933748.1	500573	504900	-	uncharacterized LOC105431679, transcript variant X1
LOC105425325	328.12	-1.77888	0.236705	-7.51516	5.68406e-14	7.67339e-13	NW_011933592.1	704193	806036	+	uncharacterized LOC105425325
LOC105426388	17.6554	-1.77945	0.585741	-3.03795	0.00238191	0.00628328	NW_011933227.1	121393	152628	+	uncharacterized LOC105426388, transcript variant X2
LOC105428450	8.32577	-1.78013	0.764283	-2.32915	0.0198513	0.0406917	NW_011933686.1	2091598	2096156	+	uncharacterized LOC105428450
LOC105427565	219.174	-1.78051	0.351456	-5.0661	4.06058e-07	2.21377e-06	NW_011933669.1	232051	266704	-	proto-oncogene tyrosine-protein kinase ROS, transcript variant X2
LOC112552479	589.242	-1.78067	0.156362	-11.3881	4.79165e-30	2.71321e-28	NW_011933590.1	1502324	1506107	+	uncharacterized LOC112552479
LOC105432243	28.2361	-1.78079	0.490248	-3.63243	0.000280769	0.000910144	NW_011933303.1	783902	972017	-	zeta-sarcoglycan, transcript variant X1
LOC105430032	108.353	-1.78177	0.484659	-3.67634	0.000236603	0.000778783	NW_011933716.1	717931	723675	-	cytochrome P450 4C1-like
LOC105427419	290.458	-1.78665	0.323818	-5.51745	3.43955e-08	2.20648e-07	NW_011933667.1	337515	341169	-	acyl-CoA Delta(11) desaturase, transcript variant X2
LOC105424775	37.384	-1.78751	0.358995	-4.97921	6.38457e-07	3.36684e-06	NW_011933576.1	275123	281525	+	protein CBFA2T2-like
LOC105427111	250.477	-1.78822	0.215892	-8.28295	1.20159e-16	2.20607e-15	NW_011933651.1	695078	699984	-	uncharacterized LOC105427111, transcript variant X2
LOC105430672	7.12594	-1.79035	0.765439	-2.33899	0.0193361	0.0397567	NW_011933720.1	1392088	1402528	-	uncharacterized LOC105430672
LOC112552499	20.7144	-1.79329	0.592812	-3.02506	0.00248586	0.00652606	NW_011933600.1	420684	421432	-	uncharacterized LOC112552499
LOC105433638	12.856	-1.79654	0.741768	-2.42198	0.0154364	0.032606	NW_011933327.1	255015	267670	-	uncharacterized LOC105433638, transcript variant X2
LOC105422609	2001.61	-1.79717	0.134983	-13.314	1.9187e-40	1.94214e-38	NW_011933406.1	1153798	1155845	+	hemolymph lipopolysaccharide-binding protein-like, transcript variant X1
LOC105430764	1167.73	-1.79865	0.155325	-11.5799	5.21193e-31	3.17096e-29	NW_011933723.1	302576	313560	-	uncharacterized LOC105430764, transcript variant X1
LOC105426175	14804.3	-1.80136	0.157169	-11.4613	2.0641e-30	1.19843e-28	NW_011933621.1	205048	228648	+	MLX-interacting protein, transcript variant X1
LOC105425401	3226.27	-1.80313	0.0998602	-18.0566	7.00353e-73	3.33777e-70	NW_011933593.1	397399	405091	+	uncharacterized LOC105425401
LOC105433963	9.86255	-1.80712	0.758712	-2.38182	0.0172272	0.0359243	NW_011933339.1	161517	169507	-	gustatory receptor for sugar taste 64f-like, transcript variant X1
LOC105428531	38.8785	-1.80743	0.550775	-3.28162	0.00103214	0.00300626	NW_011933687.1	481449	483190	-	uncharacterized LOC105428531
LOC112552208	6.04066	-1.80823	0.771075	-2.34508	0.0190232	0.0391626	NW_011933358.1	228551	229862	+	uncharacterized LOC112552208
LOC105423159	19.3712	-1.80925	0.73083	-2.4756	0.0133011	0.0285491	NW_011933449.1	68675	69262	-	cholinesterase 1-like
LOC105433768	8.10835	-1.80932	0.691464	-2.61665	0.00887968	0.0199149	NW_011933331.1	27219	321102	-	glutamate-gated chloride channel-like, transcript variant X2
LOC105422458	23.9858	-1.81423	0.487816	-3.7191	0.000199936	0.000666726	NW_011933399.1	2005	36552	-	uncharacterized LOC105422458, transcript variant X5
LOC105433722	2121.03	-1.81467	0.167413	-10.8395	2.23739e-27	1.04454e-25	NW_011933330.1	327383	332125	+	protein inscuteable homolog
LOC105422780	119.662	-1.81637	0.211516	-8.5874	8.89617e-18	1.80096e-16	NW_011933419.1	44480	47455	+	uncharacterized LOC105422780
LOC105425755	1093.97	-1.81685	0.202153	-8.98749	2.52943e-19	6.1426e-18	NW_011933607.1	131233	148648	+	thrombospondin type-1 domain-containing protein 4-like, transcript variant X1
LOC105424238	974.867	-1.81892	0.163493	-11.1253	9.44346e-29	4.95478e-27	NW_011933555.1	906004	910718	+	protein deadpan-like
LOC105429758	26019.8	-1.82164	0.113296	-16.0786	3.60456e-58	8.77212e-56	NW_011933709.1	981534	986180	-	V-type proton ATPase 16 kDa proteolipid subunit
LOC105428647	67.4016	-1.82244	0.42424	-4.29578	1.74077e-05	7.12633e-05	NW_011933693.1	993153	996010	+	nucleoplasmin-like protein ANO39, transcript variant X2
LOC105428797	28.0601	-1.82423	0.439232	-4.15324	3.27801e-05	0.000127357	NW_011933695.1	270768	339236	-	igLON family member 5-like
LOC105426642	158.934	-1.8263	0.287425	-6.35399	2.09794e-10	1.83458e-09	NW_011933635.1	278258	281342	-	transmembrane protein 53, transcript variant X2
LOC105428741	29.6128	-1.82925	0.397128	-4.6062	4.101e-06	1.90216e-05	NW_011933694.1	309479	312827	+	vasopressin V1a receptor-like, transcript variant X1
LOC105432356	51.339	-1.8297	0.308886	-5.92355	3.15072e-09	2.35081e-08	NW_011933763.1	659998	746921	+	protein artichoke-like
LOC105430272	16.4168	-1.83252	0.75197	-2.43696	0.0148114	0.0314485	NW_011933717.1	2410497	2421621	+	BTB/POZ domain-containing protein KCTD1
LOC105433744	13.8559	-1.83438	0.63703	-2.87958	0.00398205	0.00983305	NW_011930248.1	159	1542	-	uncharacterized LOC105433744
LOC105428899	126.002	-1.83489	0.312728	-5.86737	4.42755e-09	3.238e-08	NW_011933695.1	1900953	1995812	-	mucin-2, transcript variant X2
LOC105426712	19.2807	-1.83601	0.660259	-2.78074	0.00542352	0.0129238	NW_011933636.1	178216	181040	+	allatotropin-like, transcript variant X2
LOC105432943	1666.2	-1.8362	0.173077	-10.6091	2.70197e-26	1.15318e-24	NW_011933766.1	1895743	1904044	-	ATP-binding cassette sub-family G member 1-like, transcript variant X2
LOC105426723	46057.8	-1.83621	0.175814	-10.444	1.56078e-25	6.28599e-24	NW_011933636.1	308843	330655	+	long-chain-fatty-acid--CoA ligase 4, transcript variant X5
LOC105427910	8.98701	-1.83784	0.732921	-2.50755	0.012157	0.0263906	NW_011933674.1	682191	706840	-	uncharacterized LOC105427910, transcript variant X1
LOC105424476	117.266	-1.84123	0.348436	-5.28426	1.26217e-07	7.37316e-07	NW_011933568.1	48982	231280	+	neural-cadherin-like
LOC105426590	29.8783	-1.84158	0.578672	-3.18242	0.00146048	0.00408533	NW_011933632.1	427375	431682	+	probable G-protein coupled receptor Mth-like 3
LOC105428139	75.1168	-1.84162	0.447497	-4.11538	3.8654e-05	0.000148016	NW_011933681.1	310932	320624	+	prohormone-2-like
LOC105426485	13.1681	-1.84268	0.582978	-3.16081	0.00157332	0.00435836	NW_011933631.1	141927	156295	-	uncharacterized LOC105426485
LOC105429580	26.426	-1.84575	0.538656	-3.42659	0.00061122	0.00185836	NW_011933705.1	333860	340136	+	IDLSRF-like peptide
LOC105429645	296.19	-1.84732	0.27727	-6.66254	2.69141e-11	2.62217e-10	NW_011933708.1	302763	321893	+	vesicle-associated membrane protein 2, transcript variant X1
LOC105427901	37.2969	-1.85402	0.376046	-4.93029	8.21097e-07	4.25156e-06	NW_011933674.1	157244	178943	+	uncharacterized LOC105427901
LOC105428020	3145.2	-1.85417	0.243777	-7.60601	2.82698e-14	3.94811e-13	NW_011933675.1	831687	842186	-	UDP-glucuronosyltransferase 2B15-like
LOC105422591	88.2597	-1.85512	0.300429	-6.17492	6.61986e-10	5.40843e-09	NW_011933406.1	1055114	1070438	+	uncharacterized LOC105422591, transcript variant X1
LOC105430782	31.284	-1.85575	0.460892	-4.02644	5.66282e-05	0.00020982	NW_011933295.1	58608	67660	+	uncharacterized LOC105430782
LOC105430174	1394.48	-1.85871	0.223446	-8.31838	8.91744e-17	1.67484e-15	NW_011933717.1	484120	488922	-	tubulin glycylase 3A-like, transcript variant X2
LOC105426301	54.191	-1.8603	0.654694	-2.84148	0.00449042	0.0109349	NW_011933226.1	13040	31936	-	phosphoenolpyruvate carboxykinase [GTP]-like
LOC105432040	15.3999	-1.86114	0.65013	-2.86273	0.00420011	0.0103136	NW_011933757.1	2621584	2627184	+	glucose dehydrogenase [FAD, quinone]-like
LOC105431955	15.5786	-1.86217	0.671367	-2.77369	0.00554241	0.0131796	NW_011933303.1	566231	574594	-	uncharacterized LOC105431955
LOC105425751	27.0502	-1.86433	0.419871	-4.44024	8.98596e-06	3.9021e-05	NW_011933607.1	38548	77819	-	DNA-binding protein D-ETS-4
LOC105427350	9531.05	-1.86522	0.346476	-5.38341	7.30892e-08	4.4416e-07	NW_011933665.1	355572	359711	+	inositol oxygenase
LOC105434204	20.1706	-1.86689	0.464085	-4.02272	5.75292e-05	0.000212813	NW_011933350.1	41053	59958	+	uncharacterized LOC105434204
LOC105433677	99.5401	-1.86935	0.336006	-5.56343	2.64523e-08	1.73189e-07	NW_011930217.1	58066	104477	+	uncharacterized LOC105433677
LOC105426283	12738	-1.8741	0.158628	-11.8145	3.28672e-32	2.1002e-30	NW_011933622.1	755498	764706	+	pyruvate kinase-like
LOC105427903	68.4803	-1.87573	0.623296	-3.00937	0.00261788	0.00683013	NW_011933674.1	263813	279125	+	bumetanide-sensitive sodium-(potassium)-chloride cotransporter
LOC105422303	1260.3	-1.8811	0.263019	-7.15198	8.55369e-13	1.01176e-11	NW_011933378.1	260020	262486	+	hydroxymethylglutaryl-CoA synthase 1
LOC105425915	52.6094	-1.8823	0.361973	-5.20012	1.99155e-07	1.12825e-06	NW_011933613.1	255400	314621	+	uncharacterized LOC105425915
LOC105426892	48.4396	-1.88522	0.355422	-5.30418	1.1318e-07	6.66266e-07	NW_011933643.1	334502	346380	-	frequenin-1
LOC105424789	104.94	-1.88589	0.362637	-5.2005	1.98751e-07	1.12652e-06	NW_011933577.1	101545	114470	+	sodium-coupled monocarboxylate transporter 1-like, transcript variant X9
LOC105429899	18.477	-1.88655	0.776001	-2.43111	0.0150525	0.0319188	NW_011933270.1	26978	69508	-	uncharacterized LOC105429899, transcript variant X1
LOC105427759	430.058	-1.88665	0.228656	-8.25105	1.57015e-16	2.8238e-15	NW_011933670.1	1091386	1102751	-	uncharacterized LOC105427759, transcript variant X1
LOC105430212	143.49	-1.88902	0.268081	-7.04646	1.83531e-12	2.07229e-11	NW_011933717.1	1055098	1072253	+	host cell factor 2-like, transcript variant X2
LOC105422737	16.9992	-1.89019	0.709456	-2.66427	0.00771551	0.0176183	NW_011931444.1	6	657	+	arylsulfatase I-like
LOC112552521	1699.68	-1.89217	0.216569	-8.737	2.39381e-18	5.17588e-17	NW_011933613.1	122133	124294	+	aryl hydrocarbon receptor nuclear translocator-like protein 1
LOC105429903	18.1729	-1.89356	0.637316	-2.97115	0.00296682	0.00761546	NW_011933712.1	1587367	1589313	+	uncharacterized LOC105429903, transcript variant X1
LOC105434307	176.118	-1.89466	0.760817	-2.4903	0.0127636	0.0275764	NW_011933354.1	15188	19411	+	glucose dehydrogenase [FAD, quinone]-like, transcript variant X1
LOC105432304	76.1131	-1.89588	0.430751	-4.40133	1.0759e-05	4.59185e-05	NW_011933761.1	2017053	2214169	-	transmembrane and TPR repeat-containing protein CG4341, transcript variant X1
LOC105430977	17546.1	-1.89992	0.176828	-10.7444	6.29376e-27	2.86805e-25	NW_011933725.1	3123053	3131314	+	glutamate dehydrogenase, mitochondrial
LOC105427678	2691.63	-1.90302	0.147478	-12.9037	4.28892e-38	3.86273e-36	NW_011933669.1	299960	315686	-	neuronal PAS domain-containing protein 3-like
LOC105422177	16.2478	-1.90495	0.568028	-3.35361	0.000797633	0.00237216	NW_011933367.1	296158	318439	-	ankyrin repeat and death domain-containing protein 1A-like, transcript variant X2
LOC105424402	17.3535	-1.905	0.474212	-4.01719	5.88958e-05	0.000217306	NW_011933563.1	361560	363175	+	uncharacterized LOC105424402
LOC105428791	262.659	-1.90515	0.247115	-7.70954	1.26272e-14	1.85404e-13	NW_011933694.1	878646	896565	-	neurotrimin-like
LOC105432124	617.086	-1.91446	0.185475	-10.3219	5.6083e-25	2.16715e-23	NW_011933758.1	655639	661227	+	protein white, transcript variant X1
LOC105427009	3113.35	-1.91732	0.207133	-9.2565	2.11243e-20	5.75285e-19	NW_011933649.1	272250	289591	-	cytochrome P450 4c3-like
LOC105430765	130.588	-1.91737	0.254427	-7.53605	4.84414e-14	6.63561e-13	NW_011933723.1	336921	440608	-	adenylate cyclase type 6
LOC105426876	27.6861	-1.91885	0.471092	-4.0732	4.63717e-05	0.000174588	NW_011933643.1	382203	429651	-	probable G-protein coupled receptor B0563.6
LOC105431195	1032.85	-1.92547	0.240875	-7.99363	1.31027e-15	2.14838e-14	NW_011933734.1	2613	6127	-	farnesyl pyrophosphate synthase-like, transcript variant X2
LOC105429736	7.46398	-1.92897	0.792595	-2.43374	0.0149438	0.0317	NW_011933709.1	739602	740404	-	cuticle protein 67-like
LOC105434158	98.2111	-1.93516	0.319094	-6.06456	1.32316e-09	1.0366e-08	NW_011933344.1	16357	17303	+	phosphopantothenoylcysteine decarboxylase subunit SIS2-like
LOC112552866	12.4363	-1.93691	0.575151	-3.36765	0.000758116	0.00226051	NW_011933718.1	1220717	1222116	-	uncharacterized LOC112552866
LOC105428027	33.845	-1.94122	0.475642	-4.08126	4.47923e-05	0.000169143	NW_011933675.1	1157584	1167406	-	protein madd-4-like
LOC112552727	41.5366	-1.94181	0.567324	-3.42275	0.000619922	0.00188031	NW_011933687.1	723604	755006	+	cell adhesion molecule 2-like
LOC105427920	74.9049	-1.94242	0.356354	-5.45082	5.01381e-08	3.1372e-07	NW_011933674.1	868947	873866	+	uncharacterized LOC105427920
LOC105427809	8.32449	-1.94716	0.714515	-2.72515	0.00642724	0.0150429	NW_011933671.1	386613	513629	-	zwei Ig domain protein zig-8
LOC105426656	20.1749	-1.95466	0.639909	-3.05459	0.00225367	0.00597808	NW_011933635.1	513215	518095	+	uncharacterized LOC105426656, transcript variant X2
LOC105431338	27.3217	-1.95671	0.575309	-3.40114	0.000671054	0.00202147	NW_011933738.1	175121	178408	-	facilitated trehalose transporter Tret1-like
LOC105424493	1637.98	-1.95682	0.662995	-2.95149	0.00316246	0.00804368	NW_011933571.1	94517	100108	+	filaggrin-like
LOC105422271	10.0932	-1.95888	0.735541	-2.66319	0.00774044	0.0176717	NW_011933377.1	328401	332609	+	L-lactate dehydrogenase A chain-like
LOC105425898	1328.34	-1.96112	0.241828	-8.10957	5.08009e-16	8.80395e-15	NW_011933613.1	104680	122033	+	protein cycle, transcript variant X1
LOC112552673	27.9013	-1.96254	0.475919	-4.12368	3.72863e-05	0.000143018	NW_011933247.1	175995	189589	+	uncharacterized LOC112552673
LOC105425044	358.533	-1.96468	0.268986	-7.30402	2.79285e-13	3.46471e-12	NW_011933583.1	490843	501828	+	probable G-protein coupled receptor CG31760, transcript variant X1
LOC105429480	285.285	-1.97035	0.2558	-7.70271	1.33211e-14	1.94583e-13	NW_011933704.1	822448	835436	-	neuromodulin
LOC105422788	4968.86	-1.97273	0.347726	-5.67322	1.40137e-08	9.54097e-08	NW_011933420.1	23833	32913	+	synaptic vesicle glycoprotein 2B-like
LOC105431664	649.929	-1.97324	0.192498	-10.2507	1.17519e-24	4.45094e-23	NW_011933748.1	313279	317862	-	tyrosine decarboxylase-like
LOC105431320	50.6727	-1.97676	0.394688	-5.00842	5.488e-07	2.91962e-06	NW_011933736.1	110491	130449	+	neuroligin-1
LOC105425786	10.7953	-1.97791	0.616162	-3.21005	0.0013271	0.00376193	NW_011933607.1	1503030	1515971	-	histidine decarboxylase
LOC105423425	288.917	-1.97938	0.820552	-2.41226	0.015854	0.0333956	NW_011933467.1	193625	196040	-	endocuticle structural glycoprotein SgAbd-8-like, transcript variant X1
LOC105428552	1021.11	-1.98555	0.135205	-14.6855	7.98401e-49	1.26835e-46	NW_011933687.1	393319	395125	-	epoxide hydrolase 4-like
LOC105431443	891.256	-1.98818	0.562202	-3.53641	0.000405603	0.00127278	NW_011933743.1	45693	52018	+	sorbitol dehydrogenase-like
LOC105424865	2645.92	-1.98845	0.357341	-5.56457	2.62798e-08	1.72158e-07	NW_011933205.1	93324	266918	-	basement membrane-specific heparan sulfate proteoglycan core protein-like, transcript variant X2
LOC105428446	9.45076	-1.9888	0.674028	-2.95061	0.00317143	0.00806106	NW_011933686.1	1597431	1746577	+	uncharacterized LOC105428446
LOC105424465	54.3644	-1.98913	0.302875	-6.56751	5.11643e-11	4.83651e-10	NW_011932883.1	9	1340	+	tyrosine-protein kinase receptor torso-like
LOC105422090	1662.53	-1.99168	0.12489	-15.9474	2.96914e-57	6.79221e-55	NW_011933358.1	175375	185642	-	leukocyte tyrosine kinase receptor, transcript variant X2
LOC105433398	10.5164	-1.99531	0.791622	-2.52054	0.0117175	0.0255383	NW_011933313.1	243098	252775	-	protein obstructor-E
LOC105427949	18.2802	-1.99598	0.676068	-2.95234	0.00315378	0.0080269	NW_011933674.1	1122995	1123851	+	uncharacterized LOC105427949
LOC105432932	7.82403	-1.99607	0.729828	-2.73499	0.00623827	0.0146426	NW_011933766.1	1723103	1729963	+	ionotropic receptor 93a-like
LOC105425909	45.9709	-1.99672	0.348556	-5.72856	1.01289e-08	7.0643e-08	NW_011933613.1	209923	214414	-	esterase FE4-like
LOC105425121	53.7185	-1.99812	0.405349	-4.92938	8.24918e-07	4.26749e-06	NW_011933588.1	13554	35906	+	forkhead box protein P2-like
LOC105429107	47.2484	-2.00175	0.429612	-4.65943	3.17079e-06	1.50176e-05	NW_011933697.1	1842973	1868802	+	diuretic hormone 44
LOC105422629	17.1148	-2.00478	0.625936	-3.20285	0.00136076	0.00384494	NW_011933407.1	184115	185563	+	progestin and adipoQ receptor family member 4
LOC105427731	25.9415	-2.00828	0.549296	-3.65609	0.00025609	0.000836187	NW_011933670.1	888458	937745	+	phosrestin-2-like, transcript variant X1
LOC105424616	466.648	-2.00984	0.208689	-9.63079	5.92732e-22	1.83731e-20	NW_011933573.1	272016	275099	-	uncharacterized LOC105424616
LOC105431944	20281.4	-2.01095	0.159167	-12.6342	1.36729e-36	1.15845e-34	NW_011933754.1	85626	107132	+	monocarboxylate transporter 10
LOC105432726	155.718	-2.01148	0.236028	-8.52222	1.56528e-17	3.09216e-16	NW_011933765.1	757522	765583	-	UNC93-like protein, transcript variant X2
LOC105430269	56.7745	-2.01259	0.405731	-4.96042	7.0341e-07	3.69234e-06	NW_011933717.1	2306640	2381629	+	discoidin domain-containing receptor 2-like, transcript variant X1
LOC105426762	12.4556	-2.01751	0.847464	-2.38065	0.0172821	0.0360125	NW_011933637.1	569652	575886	+	homogentisate 1,2-dioxygenase
LOC105429031	81.6818	-2.01829	0.37126	-5.43634	5.43859e-08	3.37712e-07	NW_011933697.1	117779	122015	+	tektin-3-like
LOC105434003	268.398	-2.01881	0.646337	-3.12346	0.00178737	0.0048734	NW_011933339.1	260042	266318	-	arylsulfatase B-like
LOC105427205	5.5633	-2.01968	0.826085	-2.44488	0.0144899	0.0308288	NW_011933653.1	620762	625929	+	uncharacterized LOC105427205
LOC105421973	14.0761	-2.02137	0.547353	-3.693	0.000221625	0.000732431	NW_011933355.1	15443	20392	-	dynein light chain 1, axonemal-like
LOC105422259	197.014	-2.02537	0.299814	-6.75542	1.42422e-11	1.43907e-10	NW_011933377.1	325071	328024	+	L-lactate dehydrogenase-like
LOC105429340	200.698	-2.02616	0.62751	-3.22888	0.00124275	0.00354919	NW_011933701.1	431278	433628	+	fatty acid synthase-like
LOC105428309	55.8018	-2.03033	0.405447	-5.00764	5.51009e-07	2.93e-06	NW_011933684.1	597027	597757	-	uncharacterized LOC105428309
LOC105429689	11.872	-2.03149	0.632048	-3.21413	0.00130839	0.0037135	NW_011933709.1	96101	108131	+	cytochrome P450 9e2-like
LOC105425071	17.4772	-2.03722	0.571043	-3.56754	0.000360355	0.00114334	NW_011933584.1	187410	187836	-	uncharacterized LOC105425071
LOC105426511	336.797	-2.03843	0.38371	-5.31242	1.08182e-07	6.39805e-07	NW_011933229.1	57009	60716	+	probable cytochrome P450 6a13
LOC105431530	97.0503	-2.03902	0.447693	-4.5545	5.25109e-06	2.3891e-05	NW_011933744.1	653933	660203	+	acetylcholine receptor subunit alpha-L1, transcript variant X1
LOC105426284	41.5608	-2.04107	0.398935	-5.1163	3.11594e-07	1.72759e-06	NW_011933623.1	36695	114830	+	carbonic anhydrase-related protein 10, transcript variant X1
LOC105427950	16.9336	-2.04291	0.659086	-3.0996	0.00193779	0.00522869	NW_011933674.1	1120866	1122979	+	polyadenylate-binding protein 1-B
LOC105427239	5.34788	-2.04338	0.898499	-2.27422	0.0229531	0.0462539	NW_011933653.1	121491	127017	+	RNA polymerase II degradation factor 1-like
LOC105426912	3339.02	-2.04509	0.157787	-12.9611	2.03385e-38	1.87606e-36	NW_011933646.1	392950	399642	+	probable serine/threonine-protein kinase kinX
LOC105433318	34.905	-2.04678	0.373716	-5.47683	4.33022e-08	2.73641e-07	NW_011933311.1	387511	461517	-	dipeptidase 1
LOC105422300	70.7079	-2.04777	0.290888	-7.03972	1.92626e-12	2.16856e-11	NW_011933378.1	184066	198263	+	SCY1-like protein 2, transcript variant X1
LOC105430577	106.926	-2.05107	0.274322	-7.47685	7.61256e-14	1.00778e-12	NW_011933719.1	129135	155294	-	ras-related protein Rap-1
LOC105424965	134.817	-2.05377	0.46636	-4.40384	1.06351e-05	4.54238e-05	NW_011933582.1	53148	55280	+	cytochrome P450 9e2-like
LOC105434070	98.5796	-2.05646	0.352935	-5.82674	5.65218e-09	4.07884e-08	NW_011933341.1	651838	657462	+	vesicular inhibitory amino acid transporter, transcript variant X2
LOC105431992	6.09874	-2.0581	0.861756	-2.38826	0.0169284	0.0354045	NW_011933757.1	980859	985011	+	uncharacterized LOC105431992
LOC105423988	535.35	-2.05891	0.194331	-10.5949	3.14822e-26	1.31421e-24	NW_011933543.1	68851	88437	-	uncharacterized LOC105423988
LOC105432390	1354.3	-2.06101	0.572314	-3.60119	0.000316758	0.00101829	NW_011933763.1	1030328	1033305	-	esterase FE4-like
LOC105429533	13.6596	-2.06211	0.773971	-2.66433	0.00771426	0.0176183	NW_011933704.1	1563027	1579007	+	aristaless-related homeobox protein
LOC105434273	32.4788	-2.06248	0.713816	-2.88937	0.00386015	0.00956508	NW_011933352.1	103414	105457	-	phosphoenolpyruvate carboxykinase [GTP]-like
LOC105422842	11.2792	-2.06453	0.667059	-3.09497	0.00196831	0.00530103	NW_011933420.1	594793	704042	+	uncharacterized LOC105422842
LOC105428523	5.04549	-2.066	0.906325	-2.27953	0.0226354	0.0456782	NW_011933687.1	433873	440504	-	uncharacterized LOC105428523, transcript variant X4
LOC105432828	10.2743	-2.07073	0.816289	-2.53676	0.0111885	0.0245161	NW_011933766.1	604703	608513	-	uncharacterized LOC105432828
LOC105429452	192.142	-2.07196	0.351154	-5.90044	3.62535e-09	2.68219e-08	NW_011933704.1	364084	403079	+	disintegrin and metalloproteinase domain-containing protein 11, transcript variant X4
LOC105433795	9.00417	-2.07288	0.840539	-2.46613	0.0136581	0.0292548	NW_011933333.1	139117	154494	-	sex peptide receptor
LOC105428940	518.346	-2.07409	0.165092	-12.5632	3.36309e-36	2.76741e-34	NW_011933695.1	2414127	2443001	-	transcription factor Ken, transcript variant X2
LOC105429277	517.936	-2.07419	0.580622	-3.57235	0.000353787	0.00112531	NW_011933699.1	1018855	1022562	+	cytochrome P450 6k1-like
LOC105421986	24.0354	-2.07871	0.490941	-4.23414	2.29432e-05	9.17889e-05	NW_011933355.1	516044	522069	-	vitamin K-dependent gamma-carboxylase
LOC105427516	14417.9	-2.08007	0.139741	-14.8852	4.1151e-50	7.01975e-48	NW_011933667.1	760580	776563	-	protein FAM151A
LOC105422979	5.18303	-2.08649	0.847587	-2.46168	0.0138289	0.0295654	NW_011933425.1	170740	181609	-	homeobox protein Hmx-like
LOC105422261	449.656	-2.09128	0.202131	-10.3461	4.35705e-25	1.70089e-23	NW_011933377.1	333858	381253	+	uncharacterized LOC105422261
LOC105422266	180.269	-2.09324	0.223051	-9.38458	6.31682e-21	1.79285e-19	NW_011933377.1	1058970	1061538	-	farnesol dehydrogenase-like, transcript variant X2
LOC105425102	4741.39	-2.0944	0.136364	-15.3589	3.08826e-53	6.19711e-51	NW_011933586.1	342093	356025	-	aquaporin AQPcic-like
LOC105425747	15.4639	-2.09522	0.560651	-3.73711	0.000186148	0.00062329	NW_011933605.1	702656	914845	+	uncharacterized LOC105425747
LOC105428770	1748.2	-2.09703	0.21307	-9.84198	7.42385e-23	2.47064e-21	NW_011933263.1	38567	71998	-	orexin receptor type 2-like, transcript variant X2
LOC105428169	17.2137	-2.09974	0.603505	-3.47923	0.000502848	0.00155364	NW_011933681.1	616387	621532	+	uncharacterized LOC105428169
LOC105428206	40.4337	-2.10315	0.455811	-4.61409	3.94823e-06	1.83876e-05	NW_011933681.1	107442	205503	-	uncharacterized LOC105428206
LOC105423592	5.96719	-2.10401	0.848277	-2.48033	0.013126	0.0282314	NW_011933502.1	540743	645351	+	protein grainyhead, transcript variant X2
LOC105427768	14.8111	-2.10459	0.591053	-3.56074	0.000369815	0.00116978	NW_011933670.1	167529	169929	-	cGMP-specific 3',5'-cyclic phosphodiesterase-like
LOC112552551	42.7473	-2.10758	0.510279	-4.13025	3.6237e-05	0.000139367	NW_011933624.1	675960	676815	+	uncharacterized LOC112552551
LOC105432591	51.9797	-2.10857	0.287427	-7.33602	2.20042e-13	2.7597e-12	NW_011933764.1	1344541	1462330	+	transmembrane and TPR repeat-containing protein 1-like
LOC105422156	190.577	-2.10987	0.212079	-9.94849	2.56028e-23	8.84729e-22	NW_011933367.1	27448	34339	+	uncharacterized LOC105422156, transcript variant X1
LOC105431134	20.0147	-2.11001	0.512	-4.12111	3.77046e-05	0.000144574	NW_011933730.1	28282	31437	-	multiple coagulation factor deficiency protein 2 homolog
LOC105429868	2127.85	-2.1149	0.256015	-8.26083	1.44667e-16	2.60993e-15	NW_011933712.1	721541	723306	+	juvenile hormone acid O-methyltransferase-like
LOC105424859	921.53	-2.1188	0.658073	-3.21971	0.00128322	0.00365476	NW_011933577.1	757522	759938	+	myo-inositol 2-dehydrogenase-like
LOC105427913	126.058	-2.12016	0.319206	-6.64197	3.09528e-11	3.00032e-10	NW_011933674.1	726326	779869	+	angiotensin-converting enzyme, transcript variant X1
LOC105429712	833.027	-2.12261	0.234425	-9.05454	1.37143e-19	3.43248e-18	NW_011933709.1	439080	440906	+	uncharacterized LOC105429712
LOC105427266	250.982	-2.12307	0.310258	-6.84292	7.75976e-12	8.09819e-11	NW_011933656.1	151882	158761	+	uncharacterized LOC105427266, transcript variant X1
LOC105429679	15.6464	-2.12453	0.655067	-3.24322	0.00118188	0.00339485	NW_011933268.1	366064	367338	+	uncharacterized LOC105429679, transcript variant X2
LOC105434243	5.90087	-2.1252	0.839017	-2.53297	0.0113102	0.0247423	NW_011933351.1	526248	549085	+	protein gooseberry-neuro-like
LOC105431936	72.043	-2.12825	0.31743	-6.70464	2.01908e-11	1.99777e-10	NW_011933754.1	707677	709052	+	galactoside 2-alpha-L-fucosyltransferase 2-like
LOC105423811	35.2324	-2.13044	0.409081	-5.20788	1.9101e-07	1.08479e-06	NW_011933524.1	210457	214193	+	CAPA peptides-like, transcript variant X1
LOC105432534	83.2889	-2.13221	0.325158	-6.55745	5.47346e-11	5.16546e-10	NW_011933763.1	2898989	2918189	-	prominin-1-A
LOC105425126	12.2825	-2.13443	0.778448	-2.74191	0.00610835	0.0143716	NW_011933588.1	81481	106187	-	uncharacterized LOC105425126, transcript variant X3
LOC105429902	268.677	-2.13544	0.236145	-9.04292	1.52546e-19	3.79308e-18	NW_011933712.1	1583829	1586866	+	general odorant-binding protein 69a-like, transcript variant X2
LOC105428887	464.697	-2.13568	0.707773	-3.01746	0.00254904	0.00667031	NW_011933695.1	1840531	1843461	+	probable cytochrome P450 304a1
LOC105431749	20.0428	-2.13576	0.524497	-4.07201	4.66093e-05	0.000175367	NW_011933748.1	2053726	2058481	-	pancreatic triacylglycerol lipase-like
LOC105428327	971.674	-2.14325	0.264679	-8.09753	5.6088e-16	9.60381e-15	NW_011933684.1	15604	23022	+	cuticle protein 7-like
LOC105433999	2460.09	-2.14516	0.496917	-4.31695	1.58203e-05	6.53258e-05	NW_011933339.1	564587	573183	-	cytochrome P450 4g15
LOC105424822	374.097	-2.14683	0.260714	-8.23443	1.80416e-16	3.22941e-15	NW_011933577.1	463974	465671	+	uncharacterized LOC105424822
LOC105423973	47.384	-2.14854	0.633973	-3.38902	0.000701437	0.00210502	NW_011933542.1	66398	84099	+	uncharacterized LOC105423973
LOC105432646	146.463	-2.15788	0.343101	-6.28932	3.18858e-10	2.71968e-09	NW_011933764.1	2292036	2321708	-	teneurin-a
LOC105427484	6703.76	-2.15932	0.499139	-4.32609	1.51778e-05	6.28545e-05	NW_011933667.1	1660658	1668962	-	uncharacterized LOC105427484
LOC105427490	31.6013	-2.15979	0.46947	-4.60049	4.21502e-06	1.9503e-05	NW_011933667.1	1678396	1684637	+	uncharacterized LOC105427490
LOC105423729	223.103	-2.1685	0.236162	-9.18223	4.22258e-20	1.12321e-18	NW_011933512.1	264320	268116	-	sialin
LOC105427208	6.75422	-2.16989	0.798928	-2.716	0.00660765	0.0154021	NW_011933653.1	839086	839731	+	uncharacterized LOC105427208
LOC105433515	60.4556	-2.17324	0.316869	-6.85847	6.96016e-12	7.32386e-11	NW_011933322.1	19439	22408	-	uncharacterized LOC105433515
LOC105422021	2092.52	-2.17822	0.210276	-10.3589	3.81515e-25	1.50475e-23	NW_011933355.1	910125	915694	+	superoxide dismutase [Cu-Zn], chloroplastic-like
LOC105434145	289.367	-2.18022	0.711714	-3.06334	0.00218881	0.00582631	NW_011933341.1	1166092	1171081	-	protein spaetzle 5, transcript variant X1
LOC105432327	10.7318	-2.18473	0.808297	-2.70288	0.00687424	0.0159553	NW_011933762.1	71232	73920	+	uncharacterized LOC105432327, transcript variant X2
LOC105424235	193.698	-2.18491	0.346489	-6.30585	2.86616e-10	2.46119e-09	NW_011933555.1	768465	772782	+	protein lev-9
LOC105432603	10.9404	-2.18492	0.706762	-3.09145	0.00199184	0.0053581	NW_011933764.1	1742817	1750018	+	uncharacterized LOC105432603
LOC105427523	4.97453	-2.18923	0.970691	-2.25533	0.0241128	0.0483694	NW_011933667.1	1782908	1785691	+	odorant receptor 13a-like
LOC105430933	562.203	-2.18939	0.876414	-2.49813	0.0124851	0.0270259	NW_011933725.1	2649735	2652366	-	farnesyl pyrophosphate synthase-like, transcript variant X1
LOC105426529	132.581	-2.19164	0.237461	-9.2295	2.71893e-20	7.35205e-19	NW_011933632.1	215772	217360	+	uncharacterized LOC105426529
LOC105426440	7.22546	-2.19574	0.920428	-2.38556	0.0170529	0.035604	NW_011933630.1	64221	141188	+	neurotrimin-like, transcript variant X1
LOC105422393	5.53756	-2.1961	0.941323	-2.33299	0.0196488	0.0403312	NW_011933382.1	146716	146909	+	uncharacterized LOC105422393
LOC105432365	54.5291	-2.20759	0.673583	-3.27739	0.00104773	0.00304702	NW_011929988.1	59	4308	-	venom carboxylesterase-6-like
LOC105428015	2017.1	-2.21697	0.154842	-14.3176	1.69896e-46	2.36985e-44	NW_011933675.1	805892	808479	+	5-aminolevulinate synthase, erythroid-specific, mitochondrial, transcript variant X1
LOC105433558	42.8046	-2.22037	0.424746	-5.22753	1.71791e-07	9.84443e-07	NW_011933323.1	267621	327443	+	regulating synaptic membrane exocytosis protein 2
LOC105428127	11.4008	-2.22189	0.744487	-2.98446	0.00284082	0.00732655	NW_011933681.1	4563	10633	-	uncharacterized LOC105428127
LOC105428222	100.693	-2.24519	0.359045	-6.25323	4.02045e-10	3.3888e-09	NW_011933682.1	177472	179359	+	cytochrome P450 9e2-like
LOC105431148	349.896	-2.24677	0.279716	-8.03234	9.56321e-16	1.59918e-14	NW_011933732.1	217424	229052	+	elongation of very long chain fatty acids protein 1-like, transcript variant X6
LOC105423313	63.6167	-2.25181	0.558039	-4.03522	5.45519e-05	0.000202783	NW_011933457.1	1002135	1092003	+	slit homolog 1 protein-like
LOC105433195	28.0157	-2.25285	0.536	-4.20308	2.63307e-05	0.000104067	NW_011933770.1	605316	613150	+	cilia- and flagella-associated protein 43-like
LOC105424767	1607.38	-2.25519	0.247047	-9.12861	6.93869e-20	1.79153e-18	NW_011933576.1	214649	224552	-	uridine phosphorylase 1
LOC112552632	143.662	-2.26133	0.316368	-7.14778	8.81894e-13	1.04206e-11	NW_011933649.1	272151	289434	-	uncharacterized LOC112552632
LOC105432271	26.1881	-2.27001	0.488083	-4.65086	3.30548e-06	1.56067e-05	NW_011933761.1	1116984	1235378	+	glutamate receptor ionotropic, kainate 2-like
LOC105426454	103.031	-2.27367	0.261709	-8.68777	3.69612e-18	7.88734e-17	NW_011933631.1	85833	111742	+	acetylcholinesterase-like, transcript variant X2
LOC105433416	895.408	-2.2744	0.72969	-3.11694	0.00182741	0.00497073	NW_011933313.1	461307	467674	-	cytochrome b5-related protein, transcript variant X2
LOC105429730	28.2515	-2.27997	0.440075	-5.18086	2.20869e-07	1.24387e-06	NW_011933709.1	694244	697948	-	uncharacterized LOC105429730
LOC105427817	44.6366	-2.2816	0.43367	-5.26115	1.43159e-07	8.28669e-07	NW_011933671.1	1301194	1309981	-	uncharacterized LOC105427817, transcript variant X1
LOC105423580	175.301	-2.28532	0.18061	-12.6534	1.07196e-36	9.21881e-35	NW_011933502.1	64617	111412	-	lachesin-like
LOC105429015	28.3073	-2.29065	0.695044	-3.29568	0.000981821	0.00287214	NW_011933696.1	1102044	1104227	-	uncharacterized LOC105429015
LOC105432147	11.106	-2.29543	0.698392	-3.28674	0.00101353	0.00295735	NW_011933758.1	1233836	1234957	+	cuticle protein 18.7-like
LOC105426958	58.472	-2.29557	0.40917	-5.61031	2.01969e-08	1.34622e-07	NW_011933648.1	12468	119429	-	zwei Ig domain protein zig-8-like, transcript variant X1
LOC105427724	2172.08	-2.2972	0.817291	-2.81075	0.0049426	0.0118943	NW_011933241.1	312125	318627	+	glycine-rich cell wall structural protein 1.0-like
LOC105429178	116.628	-2.30449	0.441032	-5.22521	1.73957e-07	9.95359e-07	NW_011933699.1	291630	299161	+	putative carbonic anhydrase 3, transcript variant X1
LOC105426523	126.061	-2.30637	0.314928	-7.32349	2.41597e-13	3.0168e-12	NW_011933632.1	196314	200216	+	uncharacterized LOC105426523
LOC112552748	970.615	-2.3072	0.151975	-15.1814	4.69403e-52	8.65973e-50	NW_011933694.1	410275	411669	+	uncharacterized LOC112552748
LOC105433408	1697.53	-2.30908	0.211956	-10.8941	1.22919e-27	5.85814e-26	NW_011933313.1	349930	377796	+	aquaporin AQPAn.G, transcript variant X3
LOC105424733	131.549	-2.31449	0.911031	-2.54052	0.0110688	0.024277	NW_011933575.1	573452	576392	-	pheromone-binding protein Gp-9-like, transcript variant X2
LOC105425606	8.43246	-2.31703	0.800387	-2.89489	0.00379289	0.00942292	NW_011933600.1	234626	236413	-	uncharacterized LOC105425606
LOC105431110	9.73936	-2.31908	0.913133	-2.5397	0.0110948	0.0243293	NW_011933728.1	858056	860701	+	uncharacterized LOC105431110, transcript variant X1
LOC105433194	38.3228	-2.32141	0.560477	-4.14184	3.44531e-05	0.000132999	NW_011933770.1	470764	480987	-	transmembrane protease serine 6-like
LOC112552920	6.27893	-2.32899	0.887958	-2.62286	0.0087195	0.0196097	NW_011933734.1	43280	43734	+	uncharacterized LOC112552920
LOC105424823	1209.65	-2.33174	0.20806	-11.2071	3.76506e-29	1.99374e-27	NW_011933577.1	466975	476257	+	monocarboxylate transporter 9-like
LOC105427470	930.861	-2.33362	0.250567	-9.31335	1.23862e-20	3.43866e-19	NW_011933667.1	1498487	1515801	+	ATP-binding cassette sub-family G member 4-like
LOC105434202	15.1882	-2.33508	0.611449	-3.81892	0.000134035	0.000462193	NW_011933350.1	33042	113426	-	protein lozenge-like, transcript variant X7
LOC105433109	212.062	-2.33797	0.416821	-5.60905	2.03438e-08	1.35444e-07	NW_011933768.1	378127	382038	-	cytochrome P450 6k1-like
LOC105427943	33.6448	-2.34006	0.470179	-4.97697	6.45877e-07	3.40283e-06	NW_011933674.1	1064213	1069349	-	2-phosphoxylose phosphatase 1
LOC105422828	20.1604	-2.34638	0.764271	-3.07009	0.00213992	0.0057068	NW_011933420.1	358321	362798	+	proton-associated sugar transporter A, transcript variant X1
LOC112552629	6.4603	-2.35077	0.974157	-2.41313	0.0158162	0.0333283	NW_011933648.1	310256	315016	+	uncharacterized LOC112552629
LOC105428153	789.244	-2.35212	0.31226	-7.53257	4.97498e-14	6.79855e-13	NW_011933681.1	443386	516862	+	glutamate-gated chloride channel, transcript variant X6
LOC105432319	7.61132	-2.35218	1.01382	-2.32011	0.020335	0.0415639	NW_011933761.1	244695	258187	+	sodium channel protein Nach-like
LOC105432959	281.494	-2.35227	0.70365	-3.34296	0.000828913	0.00245497	NW_011933766.1	1731371	1739395	+	probable GPI-anchored adhesin-like protein PGA55
LOC105430208	125.498	-2.3546	0.295215	-7.97587	1.51317e-15	2.46547e-14	NW_011933717.1	1037782	1045229	+	cationic amino acid transporter 4, transcript variant X3
LOC105426761	1122.22	-2.35699	0.248392	-9.48899	2.33282e-21	6.91265e-20	NW_011933637.1	537852	547619	-	putative inorganic phosphate cotransporter
LOC105431254	4.98966	-2.35776	1.02845	-2.29253	0.021875	0.0443235	NW_011933734.1	497852	505536	-	uncharacterized LOC105431254
LOC105429643	132.941	-2.37092	0.435571	-5.44324	5.23201e-08	3.2648e-07	NW_011933268.1	359051	363089	+	phospholipase A2-like, transcript variant X2
LOC105423303	36.6224	-2.37122	0.375366	-6.3171	2.66522e-10	2.30248e-09	NW_011933457.1	1181511	1230535	+	laccase-5-like
LOC105430828	1035.37	-2.37487	0.628606	-3.77799	0.0001581	0.000535015	NW_011933723.1	759022	768560	-	uncharacterized LOC105430828
LOC105429493	52.0949	-2.37916	0.48963	-4.85909	1.17927e-06	5.94995e-06	NW_011933704.1	900759	904281	+	uncharacterized LOC105429493
LOC105430661	23.3218	-2.38197	0.544779	-4.37235	1.22917e-05	5.19749e-05	NW_011933720.1	975847	1278562	+	zwei Ig domain protein zig-8-like
LOC105431526	11992.9	-2.38198	0.185552	-12.8373	1.01401e-37	8.99093e-36	NW_011933744.1	421524	463836	-	uncharacterized LOC105431526, transcript variant X1
LOC105423055	17.4289	-2.38557	0.712923	-3.34619	0.000819316	0.00242906	NW_011933434.1	377575	380299	+	dopamine N-acetyltransferase-like, transcript variant X2
LOC105429978	9.15723	-2.38822	0.771118	-3.09709	0.0019543	0.005272	NW_011933715.1	320355	330256	+	basic helix-loop-helix transcription factor amos, transcript variant X1
LOC105429475	7.89516	-2.39469	0.899737	-2.66154	0.00777843	0.0177407	NW_011933704.1	744694	745134	-	uncharacterized LOC105429475
LOC105429697	229.005	-2.40468	0.323036	-7.444	9.76822e-14	1.27945e-12	NW_011933709.1	160173	174805	-	synaptotagmin 1, transcript variant X2
LOC105428931	132.541	-2.4161	0.776555	-3.11131	0.00186262	0.00505328	NW_011933695.1	2340058	2341077	-	glycine-rich RNA-binding protein 1-like
LOC105431102	4.49024	-2.42085	0.978407	-2.47427	0.0133507	0.0286502	NW_011933728.1	774394	776522	+	uncharacterized LOC105431102
LOC105430896	41.5103	-2.42085	0.441511	-5.4831	4.17938e-08	2.65281e-07	NW_011933725.1	1455745	1458174	+	uncharacterized LOC105430896, transcript variant X1
LOC105432437	188.937	-2.44622	0.309108	-7.91379	2.49666e-15	3.98701e-14	NW_011933763.1	2093220	2104908	+	octopamine receptor Oamb, transcript variant X2
LOC105430546	12.4341	-2.44828	0.740972	-3.30414	0.000952678	0.00279332	NW_011933718.1	707287	715282	-	corticotropin-releasing factor-binding protein
LOC105431276	831.3	-2.45245	0.236761	-10.3583	3.83554e-25	1.50759e-23	NW_011933734.1	7222	11613	+	farnesyl pyrophosphate synthase 1-like
LOC105426800	28.7732	-2.45287	0.637371	-3.84841	0.000118885	0.000414718	NW_011933638.1	239753	275322	-	uncharacterized LOC105426800, transcript variant X4
LOC105425307	126.862	-2.45548	0.233995	-10.4937	9.22942e-26	3.78373e-24	NW_011933592.1	418807	427618	+	proton-coupled amino acid transporter-like protein pathetic
LOC105423682	12.5204	-2.45649	0.786892	-3.12177	0.0017977	0.00489806	NW_011932039.1	319	1860	+	fatty acid synthase-like
LOC105423910	90.0176	-2.45737	0.626667	-3.92133	8.80625e-05	0.000315261	NW_011932200.1	6427	6954	+	uncharacterized LOC105423910
LOC105421984	3283.12	-2.46031	0.187404	-13.1284	2.26448e-39	2.19501e-37	NW_011933355.1	329321	336869	+	UNC93-like protein, transcript variant X3
LOC105428323	8.70858	-2.46056	0.997335	-2.46713	0.0136199	0.0291787	NW_011933684.1	827771	828917	+	uncharacterized LOC105428323
LOC105428534	8.30182	-2.46069	0.957768	-2.56919	0.0101937	0.0225392	NW_011933687.1	786836	789423	+	major royal jelly protein 1-like
LOC105428764	568.05	-2.46084	0.328039	-7.50167	6.30108e-14	8.44921e-13	NW_011933694.1	412303	417570	-	neprilysin-2-like
LOC105434118	1991.23	-2.46187	0.183872	-13.3891	7.00692e-41	7.22028e-39	NW_011933341.1	979551	986204	-	tyramine beta-hydroxylase, transcript variant X1
LOC105423269	55.5241	-2.46375	0.607164	-4.05781	4.95353e-05	0.000185401	NW_011933456.1	7832	12309	+	uncharacterized LOC105423269, transcript variant X5
LOC105426663	31.2551	-2.46603	0.786885	-3.13392	0.00172488	0.00472653	NW_011933635.1	597902	601336	+	uncharacterized LOC105426663
LOC105428761	4931.65	-2.46922	0.138766	-17.7941	7.84984e-71	3.20666e-68	NW_011933694.1	397789	409749	+	organic cation transporter protein, transcript variant X5
LOC105425916	82.1578	-2.47309	0.365439	-6.76745	1.31072e-11	1.32908e-10	NW_011933613.1	334691	338997	+	uncharacterized LOC105425916
LOC105433161	7.29339	-2.48047	0.895142	-2.77104	0.00558782	0.0132793	NW_011933307.1	237629	239899	-	uncharacterized LOC105433161
LOC105427463	169.329	-2.48298	0.4724	-5.2561	1.4714e-07	8.49136e-07	NW_011933667.1	1157957	1170225	+	excitatory amino acid transporter
LOC105433160	212.091	-2.49685	0.329734	-7.57231	3.66635e-14	5.07083e-13	NW_011933770.1	274693	283378	+	lysyl oxidase homolog 3, transcript variant X2
LOC105427676	11.6886	-2.49765	0.783894	-3.18621	0.00144149	0.00404311	NW_011933669.1	27805	45919	+	dentin sialophosphoprotein
LOC105422154	133.615	-2.49846	0.764356	-3.26872	0.00108036	0.00313713	NW_011933366.1	320537	327945	-	juvenile hormone esterase-like
LOC105432456	36.0625	-2.50563	0.584988	-4.28321	1.84218e-05	7.50121e-05	NW_011933763.1	2190836	2271525	-	dopamine receptor 1, transcript variant X3
LOC105434143	384.862	-2.50616	0.291437	-8.59932	8.01872e-18	1.6291e-16	NW_011933341.1	1184566	1188362	+	sodium-coupled monocarboxylate transporter 2-like
LOC105422810	47.5175	-2.50743	0.333471	-7.51916	5.51272e-14	7.46207e-13	NW_011933420.1	224702	228437	+	uncharacterized LOC105422810, transcript variant X1
LOC105423477	1092.65	-2.50772	0.392914	-6.38238	1.74359e-10	1.54239e-09	NW_011933478.1	55860	58588	-	pyridoxine-5'-phosphate oxidase-like
LOC105427816	160.211	-2.50782	0.315326	-7.95311	1.81892e-15	2.94686e-14	NW_011933671.1	1292927	1296894	-	fatty acyl-CoA reductase wat-like
LOC105425277	379.165	-2.50836	0.713115	-3.51747	0.000435677	0.00135858	NW_011933591.1	643164	645427	-	elongation of very long chain fatty acids protein 1-like, transcript variant X1
LOC105424676	3953.04	-2.51675	0.177664	-14.1658	1.49148e-45	1.93858e-43	NW_011933574.1	158645	164576	-	cationic amino acid transporter 3
LOC105424764	803.223	-2.52	0.23288	-10.821	2.73734e-27	1.2676e-25	NW_011933576.1	133711	136682	+	uncharacterized LOC105424764, transcript variant X1
LOC105428148	7.77056	-2.53608	0.81447	-3.11379	0.00184703	0.00501455	NW_011933681.1	406369	408651	+	neuronal PAS domain-containing protein 4-like
LOC105427970	515.414	-2.5377	0.907809	-2.79541	0.00518343	0.0123982	NW_011933674.1	355774	356558	+	uncharacterized LOC105427970
LOC105430811	398.552	-2.53839	0.631311	-4.02082	5.79958e-05	0.000214262	NW_011933723.1	761739	763862	+	probable cytochrome P450 6a13
LOC112553041	523.713	-2.5394	0.31271	-8.12063	4.63761e-16	8.04932e-15	NW_011933312.1	78028	81853	-	fatty acyl-CoA reductase 1-like
LOC105430756	62.2822	-2.54238	0.644418	-3.94523	7.97243e-05	0.000286577	NW_011933295.1	6498	8148	+	cytochrome b5, transcript variant X3
LOC105430918	50255.1	-2.54368	0.180913	-14.0602	6.67121e-45	8.11759e-43	NW_011933725.1	2503822	2508180	-	serine hydroxymethyltransferase, cytosolic, transcript variant X4
LOC105425566	109.373	-2.54396	0.532991	-4.77298	1.81522e-06	8.89184e-06	NW_011933598.1	199233	207366	+	galanin receptor type 3-like, transcript variant X3
LOC105425869	120.005	-2.55035	0.339365	-7.51505	5.68896e-14	7.67339e-13	NW_011933611.1	665092	683491	-	nephrin, transcript variant X5
LOC105433952	226.953	-2.56473	0.831435	-3.0847	0.00203759	0.00547087	NW_011933339.1	48344	50774	-	cytochrome P450 9e2-like
LOC105431367	69.0802	-2.56617	0.332013	-7.72913	1.08287e-14	1.59612e-13	NW_011933738.1	428120	466678	-	mucin-17
LOC105427682	24.152	-2.57318	0.608634	-4.2278	2.35992e-05	9.41825e-05	NW_011933669.1	911422	921565	-	uncharacterized LOC105427682
LOC105427135	15.896	-2.57598	0.769577	-3.34726	0.00081614	0.00242153	NW_011933651.1	270752	277343	-	choline O-acetyltransferase
LOC105426513	282.481	-2.57759	0.882635	-2.92034	0.00349653	0.00876986	NW_011933632.1	163862	164798	+	uncharacterized LOC105426513
LOC105423315	10.2251	-2.58648	0.663362	-3.89904	9.65748e-05	0.000342731	NW_011933457.1	1267298	1305827	+	synapsin
LOC105433173	1880.45	-2.59208	0.432607	-5.99177	2.07575e-09	1.58375e-08	NW_011933770.1	598075	600195	-	uncharacterized LOC105433173
LOC105429920	44.5985	-2.59513	0.617819	-4.20047	2.66367e-05	0.000105204	NW_011933712.1	586356	619124	+	protein still life, isoform SIF type 1, transcript variant X5
LOC105427531	68.2495	-2.59934	0.436131	-5.96	2.52236e-09	1.90308e-08	NW_011933668.1	108169	120664	-	uncharacterized LOC105427531
LOC105426210	149.033	-2.60088	0.379657	-6.85059	7.35457e-12	7.72466e-11	NW_011933621.1	109375	122329	+	protein disabled
LOC105424734	2208.35	-2.60375	1.00602	-2.58816	0.00964897	0.0214384	NW_011933575.1	579195	581315	-	uncharacterized LOC105424734
LOC105432986	26.1779	-2.61748	0.621231	-4.21337	2.51583e-05	9.99516e-05	NW_011933767.1	744150	759741	-	regulator of G-protein signaling 7-binding protein-like, transcript variant X1
LOC105425764	11.031	-2.62331	0.730009	-3.59353	0.000326231	0.00104551	NW_011933607.1	525352	527194	-	protein tipE, transcript variant X1
LOC105430872	30.876	-2.62409	0.470118	-5.58178	2.3807e-08	1.57129e-07	NW_011933295.1	97986	115093	-	gamma-aminobutyric acid type B receptor subunit 2
LOC105423612	1671.99	-2.62665	0.649958	-4.04126	5.31652e-05	0.000198208	NW_011933504.1	106353	115703	-	uncharacterized LOC105423612
LOC105423721	55.1769	-2.62679	0.586496	-4.47879	7.5067e-06	3.30746e-05	NW_011933512.1	192220	195618	-	uncharacterized LOC105423721, transcript variant X3
LOC105424765	30.1387	-2.62863	0.531255	-4.94797	7.4993e-07	3.91855e-06	NW_011933576.1	132591	133425	-	uncharacterized LOC105424765
LOC105423658	3.41363	-2.62925	1.14106	-2.30422	0.0212101	0.0431618	NW_011933507.1	388768	453058	+	gamma-aminobutyric acid receptor subunit beta, transcript variant X1
LOC105432498	14.5486	-2.62976	0.576649	-4.56041	5.10534e-06	2.33113e-05	NW_011933763.1	3278718	3293050	+	endoplasmic reticulum aminopeptidase 1-like, transcript variant X1
LOC105431437	17.878	-2.63861	0.583905	-4.51891	6.21603e-06	2.77839e-05	NW_011933742.1	22173	43288	-	uncharacterized LOC105431437
LOC105423443	458.715	-2.6439	0.576504	-4.58608	4.51635e-06	2.08215e-05	NW_011933468.1	126549	133222	-	fatty acid synthase-like
LOC105424012	94.0136	-2.64572	0.406047	-6.5158	7.23048e-11	6.69112e-10	NW_011933543.1	518645	519655	+	uncharacterized LOC105424012
LOC105430550	4.95684	-2.65269	1.04317	-2.54291	0.0109933	0.0241347	NW_011933718.1	927959	946869	-	mediator of RNA polymerase II transcription subunit 15-like
LOC105431548	48.7862	-2.65283	0.689528	-3.84731	0.000119421	0.000416443	NW_011929937.1	11468	14305	+	uncharacterized LOC105431548
LOC112552485	14.0617	-2.66335	0.694158	-3.83681	0.000124644	0.000433204	NW_011933592.1	375495	378168	+	uncharacterized LOC112552485
LOC105422430	550.338	-2.66544	0.820075	-3.25024	0.00115306	0.00332126	NW_011933392.1	132190	139760	+	purine nucleoside phosphorylase-like, transcript variant X1
LOC105432427	503.304	-2.67374	0.295966	-9.03392	1.65635e-19	4.08305e-18	NW_011933763.1	1886520	1904687	-	rho-related BTB domain-containing protein 1, transcript variant X3
LOC105429879	31189.9	-2.67959	0.161484	-16.5935	7.76674e-62	2.33779e-59	NW_011933712.1	1046091	1064680	+	titin, transcript variant X3
LOC105432612	233.313	-2.68105	0.807033	-3.32211	0.000893385	0.00263568	NW_011933764.1	2189174	2206330	+	glucosylceramidase-like, transcript variant X3
LOC105433026	45.6575	-2.68344	0.455088	-5.89653	3.71232e-09	2.73769e-08	NW_011933767.1	1117872	1120727	+	uncharacterized LOC105433026, transcript variant X1
LOC105432269	84.7013	-2.69324	0.29261	-9.20419	3.44248e-20	9.22134e-19	NW_011933761.1	884724	912813	-	palmitoleoyl-protein carboxylesterase NOTUM, transcript variant X1
LOC105434157	43.7698	-2.69593	0.63964	-4.21476	2.50039e-05	9.94419e-05	NW_011933343.1	7124	36269	-	phosphoenolpyruvate carboxykinase [GTP]-like
LOC105431103	15331.4	-2.71008	0.228164	-11.8778	1.54351e-32	1.04466e-30	NW_011933728.1	764233	777108	-	calcium-transporting ATPase type 2C member 1, transcript variant X1
LOC105425075	109.377	-2.71344	0.308316	-8.80083	1.35809e-18	3.02803e-17	NW_011933585.1	160577	292569	-	hemicentin-2, transcript variant X2
LOC105422910	462.43	-2.72056	0.141689	-19.2008	3.64207e-82	2.45047e-79	NW_011933420.1	2256837	2263323	-	thiamine transporter 2-like, transcript variant X3
LOC105433953	7.70299	-2.72129	0.963993	-2.82293	0.00475864	0.0115178	NW_011933339.1	36478	47395	-	uncharacterized LOC105433953, transcript variant X2
LOC105432372	550.84	-2.72213	1.04709	-2.59971	0.00933012	0.0208068	NW_011933303.1	1239570	1251980	-	uncharacterized LOC105432372
LOC105429309	9.87274	-2.72339	0.873961	-3.11615	0.00183228	0.00498042	NW_011933701.1	98782	103974	+	uncharacterized LOC105429309, transcript variant X2
LOC105428990	437.735	-2.72804	0.142529	-19.1402	1.16899e-81	7.42831e-79	NW_011933695.1	2723740	2741899	-	zinc finger E-box-binding homeobox 1
LOC105424371	18.3814	-2.72845	0.785584	-3.47315	0.000514387	0.0015879	NW_011933562.1	366536	368274	-	histamine H2 receptor-like
LOC105427499	6.45034	-2.73393	0.886778	-3.083	0.00204928	0.0054971	NW_011933667.1	1756914	1758635	+	uncharacterized LOC105427499
LOC105430950	4776.84	-2.74071	0.157566	-17.3941	9.14932e-68	3.60862e-65	NW_011933725.1	2883949	2907175	-	V-type proton ATPase 116 kDa subunit a, transcript variant X4
LOC105430942	14.7493	-2.7498	0.795613	-3.4562	0.000547852	0.00168404	NW_011933725.1	2739603	2774037	-	muscarinic acetylcholine receptor gar-2, transcript variant X2
LOC105425792	14.386	-2.75095	0.770618	-3.5698	0.000357254	0.00113476	NW_011933214.1	42328	48629	-	axonemal 84 kDa protein-like
LOC105424846	227.422	-2.76123	0.675479	-4.0878	4.35474e-05	0.000165004	NW_011933205.1	224918	232802	+	uncharacterized LOC105424846, transcript variant X1
LOC105426717	13.4039	-2.76487	0.612814	-4.51176	6.42926e-06	2.86474e-05	NW_011933232.1	91269	96170	+	neprilysin-1-like
LOC105433810	16.3258	-2.7676	0.922847	-2.99898	0.00270887	0.0070278	NW_011933334.1	149149	159055	-	neuropeptide CCHamide-2-like, transcript variant X2
LOC105429339	680.372	-2.76935	0.433224	-6.39242	1.63277e-10	1.44997e-09	NW_011933701.1	243990	260350	+	fibrillin-2
LOC105422848	23.3397	-2.76981	0.848791	-3.26325	0.00110144	0.00319105	NW_011933420.1	812754	816565	-	peptidyl-prolyl cis-trans isomerase, rhodopsin-specific isozyme
LOC105430696	15.0867	-2.77346	0.594142	-4.66801	3.04138e-06	1.44526e-05	NW_011933720.1	1383222	1385354	-	anionic trypsin
LOC105431739	22.0341	-2.77474	0.592796	-4.68076	2.85816e-06	1.36272e-05	NW_011933748.1	1333679	1364127	+	hemicentin-1-like
LOC105433450	74.236	-2.78658	0.484124	-5.75592	8.61731e-09	6.09176e-08	NW_011933316.1	27105	30378	+	phospholipase A1
LOC105428147	40.6038	-2.79895	0.467561	-5.98627	2.14711e-09	1.63289e-08	NW_011933681.1	410093	412896	+	single-minded homolog 1-A-like
LOC105430499	48.8657	-2.80408	0.520699	-5.38523	7.2352e-08	4.40661e-07	NW_011933718.1	2635128	2636194	-	uncharacterized LOC105430499
LOC105424336	212.63	-2.81235	0.379758	-7.40565	1.30509e-13	1.67538e-12	NW_011933559.1	394138	395580	-	uncharacterized LOC105424336
LOC105431049	24.0714	-2.8189	0.5109	-5.51753	3.43805e-08	2.20648e-07	NW_011933727.1	758692	763898	+	pancreatic triacylglycerol lipase-like, transcript variant X1
LOC105428325	239.974	-2.82161	0.333408	-8.46292	2.60764e-17	5.0898e-16	NW_011933684.1	846964	852588	-	protein THEM6-like, transcript variant X1
LOC105426699	46.7706	-2.82404	0.623282	-4.53091	5.873e-06	2.64048e-05	NW_011933636.1	105440	106587	-	uncharacterized LOC105426699
LOC105432954	662.701	-2.82528	0.130831	-21.5949	2.00451e-103	2.54751e-100	NW_011933766.1	1185139	1191269	+	flocculation protein FLO11
LOC105422775	8.56373	-2.82795	1.02322	-2.76379	0.00571341	0.0135356	NW_011933419.1	21085	22528	-	juvenile hormone acid O-methyltransferase-like
LOC105430810	512.042	-2.84555	0.751345	-3.78728	0.000152307	0.000518015	NW_011933723.1	770982	772765	+	probable cytochrome P450 6a13
LOC105434315	74.4467	-2.84797	0.532506	-5.34824	8.88117e-08	5.32126e-07	NW_011933354.1	115425	123765	-	alkaline phosphatase 4-like
LOC105432309	71.3522	-2.84905	0.407022	-6.99975	2.56416e-12	2.82824e-11	NW_011933761.1	2360454	2367054	+	centrosomal protein of 104 kDa
LOC105431008	827.182	-2.85271	0.864299	-3.3006	0.000964778	0.00282662	NW_011933727.1	64541	70669	+	lysosome membrane protein 2-like
LOC105425166	24.7411	-2.85515	0.498263	-5.73021	1.00305e-08	6.99992e-08	NW_011933590.1	156009	159918	-	tetratricopeptide repeat protein 36
LOC105428437	15.145	-2.86203	0.748383	-3.82428	0.000131154	0.000453214	NW_011933686.1	1365010	1393474	-	cholecystokinin receptor-like
LOC105425380	332.717	-2.8669	0.7044	-4.06999	4.70159e-05	0.000176794	NW_011929768.1	821	3249	-	cytochrome P450 4C1-like, transcript variant X2
LOC105421985	80.8327	-2.86915	0.291524	-9.84189	7.43049e-23	2.47064e-21	NW_011933355.1	338903	447857	-	POU domain, class 6, transcription factor 1, transcript variant X3
LOC105433130	21.2674	-2.87022	0.504359	-5.69082	1.26432e-08	8.67501e-08	NW_011933768.1	556451	560097	+	sodium-dependent neutral amino acid transporter B(0)AT3
LOC105430540	5230.65	-2.87366	0.683371	-4.20513	2.60936e-05	0.000103345	NW_011933718.1	448708	458164	+	uncharacterized LOC105430540
LOC105423473	686.451	-2.87881	0.925764	-3.10966	0.00187305	0.00507557	NW_011933478.1	29291	31384	-	peptidoglycan-recognition protein SB1-like
LOC105428314	32.7082	-2.89537	0.48402	-5.98192	2.2052e-09	1.67373e-08	NW_011933684.1	706730	725366	-	proton channel OtopLc-like, transcript variant X1
LOC112552973	23.1123	-2.90805	0.589844	-4.9302	8.21474e-07	4.25159e-06	NW_011933761.1	1235714	1238414	+	uncharacterized LOC112552973
LOC105427184	30.4281	-2.91166	0.456057	-6.38442	1.72053e-10	1.52317e-09	NW_011933653.1	278367	281513	-	uncharacterized LOC105427184
LOC105430282	15.1851	-2.91519	0.578682	-5.03765	4.71288e-07	2.53914e-06	NW_011933717.1	2467497	2472612	-	tryptophan 5-hydroxylase 1
LOC105425801	15.9443	-2.91723	0.668872	-4.36142	1.29223e-05	5.43403e-05	NW_011929786.1	6	1364	+	fatty acid synthase-like
LOC105424487	201.38	-2.92002	0.384765	-7.58911	3.22115e-14	4.47673e-13	NW_011933571.1	12561	16449	-	chymotrypsin-2-like
LOC105426718	19.3977	-2.92546	0.731015	-4.00192	6.28309e-05	0.000230119	NW_011933636.1	232813	249716	+	pinin-like, transcript variant X1
LOC105432160	42.6618	-2.93368	0.409771	-7.15931	8.10854e-13	9.63089e-12	NW_011933758.1	33909	41003	-	major facilitator superfamily domain-containing protein 6-A
LOC105426483	142.663	-2.9385	0.777543	-3.77922	0.000157323	0.000532857	NW_011933631.1	73583	81868	-	uncharacterized LOC105426483
LOC105425308	61675.1	-2.93954	0.180238	-16.3092	8.4935e-60	2.15886e-57	NW_011933592.1	427085	438039	+	proton-coupled amino acid transporter-like protein pathetic, transcript variant X1
LOC105433492	5.7549	-2.94088	1.21185	-2.42677	0.0152341	0.0322501	NW_011933318.1	209824	313720	+	uncharacterized LOC105433492
LOC105425703	79.5437	-2.94209	0.282293	-10.4221	1.9653e-25	7.85981e-24	NW_011933605.1	588649	589754	+	sodium-coupled monocarboxylate transporter 1-like
LOC105433629	997.976	-2.96931	0.224013	-13.2551	4.21752e-40	4.19478e-38	NW_011933327.1	138540	172088	-	serine protease inhibitor dipetalogastin
LOC105428036	60.0585	-2.96984	0.480612	-6.17929	6.43907e-10	5.27202e-09	NW_011933676.1	131593	223286	-	Down syndrome cell adhesion molecule-like protein Dscam2, transcript variant X7
LOC105434125	45.6019	-2.97054	0.558464	-5.31912	1.04271e-07	6.18275e-07	NW_011933341.1	1006367	1011854	+	monocarboxylate transporter 12
LOC105428432	8172.81	-2.98289	0.750783	-3.97304	7.09613e-05	0.000257587	NW_011933686.1	1205996	1210067	-	cytochrome P450 4g15-like
LOC105433489	1715.24	-2.98314	0.26436	-11.2844	1.56788e-29	8.53971e-28	NW_011933318.1	131923	149345	-	venom metalloproteinase 3, transcript variant X1
LOC105422824	192.758	-2.98567	0.8707	-3.42904	0.00060571	0.00184406	NW_011933420.1	347177	351875	-	synaptic vesicle glycoprotein 2C-like
LOC105428982	18.7035	-2.98859	0.71382	-4.18675	2.82979e-05	0.000111189	NW_011933695.1	1519368	1532193	-	uncharacterized LOC105428982
LOC105429674	14.7555	-2.99383	0.710949	-4.21102	2.54215e-05	0.000100927	NW_011933708.1	564852	565875	-	uncharacterized LOC105429674, transcript variant X2
LOC105425816	214.902	-2.99474	0.849126	-3.52685	0.000420538	0.00131604	NW_011933214.1	62706	64403	-	fatty acyl-CoA reductase wat-like
LOC105426438	272.297	-3.01705	0.311173	-9.69573	3.1437e-22	9.98823e-21	NW_011933630.1	6	3330	-	trypsin-1-like
LOC105428313	12.878	-3.02076	0.651963	-4.63334	3.5982e-06	1.68535e-05	NW_011933684.1	676537	693719	-	proton channel OtopLc-like
LOC105430734	550.204	-3.03513	0.564688	-5.37489	7.66307e-08	4.63267e-07	NW_011933722.1	48969	75115	-	peroxidase, transcript variant X1
LOC105424263	13.9966	-3.03669	0.684285	-4.43775	9.09035e-06	3.93697e-05	NW_011933557.1	665651	667868	+	zinc metalloproteinase nas-4-like
LOC105430639	6.94757	-3.04691	1.09921	-2.77191	0.00557279	0.0132464	NW_011933720.1	281590	282709	+	uncharacterized LOC105430639
LOC105425806	40.2245	-3.05181	0.478755	-6.37447	1.83593e-10	1.61907e-09	NW_011933608.1	35109	74403	+	otoferlin-like, transcript variant X1
LOC105424014	5.01354	-3.06254	1.07844	-2.8398	0.00451425	0.0109836	NW_011932314.1	10739	12450	+	uncharacterized LOC105424014
LOC105428124	1289.68	-3.07137	0.488219	-6.29098	3.15475e-10	2.69284e-09	NW_011933680.1	138149	146351	+	aminopeptidase N-like
LOC105423307	32.7558	-3.07268	0.55795	-5.50708	3.64833e-08	2.33256e-07	NW_011933457.1	1319644	1343137	+	uncharacterized LOC105423307, transcript variant X5
LOC105427456	173.438	-3.08745	0.401014	-7.69912	1.37012e-14	1.99128e-13	NW_011933667.1	801325	809025	-	protein borderless, transcript variant X2
LOC105427193	85.3653	-3.08843	0.469321	-6.58065	4.68409e-11	4.44989e-10	NW_011933653.1	468379	475314	+	guanine nucleotide-binding protein subunit gamma-e
LOC105434203	451.972	-3.09169	0.766061	-4.03583	5.441e-05	0.000202453	NW_011930915.1	67373	79858	-	fatty acyl-CoA reductase 1-like
LOC105422986	80.3221	-3.10291	1.02805	-3.01826	0.00254233	0.00665428	NW_011933425.1	344915	345470	+	uncharacterized LOC105422986
LOC105423431	1545.93	-3.10416	0.164689	-18.8486	3.01753e-79	1.72572e-76	NW_011933467.1	140586	154376	-	sodium- and chloride-dependent GABA transporter ine-like
LOC105429529	160.235	-3.10633	0.289446	-10.732	7.20259e-27	3.20557e-25	NW_011933704.1	1496896	1537333	+	protein Skeletor, isoforms B/C
LOC105423891	12.246	-3.11556	0.765515	-4.06989	4.70349e-05	0.000176794	NW_011933534.1	609854	626646	+	uncharacterized LOC105423891
LOC105422381	21.5186	-3.11763	0.689634	-4.5207	6.16359e-06	2.7571e-05	NW_011933381.1	592662	594201	+	uncharacterized LOC105422381
LOC105432963	45.665	-3.12391	0.441351	-7.07807	1.46179e-12	1.66368e-11	NW_011933767.1	2476	8693	+	uncharacterized LOC105432963
LOC105425279	217.349	-3.13774	0.39611	-7.92139	2.34866e-15	3.76246e-14	NW_011933591.1	636120	638453	+	elongation of very long chain fatty acids protein AAEL008004-like
LOC105423413	3.59252	-3.14089	1.31312	-2.39193	0.0167602	0.0350976	NW_011933467.1	65712	68511	+	uncharacterized LOC105423413
LOC105422843	16.8258	-3.14388	0.696299	-4.51513	6.32777e-06	2.82502e-05	NW_011933420.1	714642	741327	-	fez family zinc finger protein 1
LOC105434244	123.998	-3.144	0.469955	-6.68999	2.23189e-11	2.19694e-10	NW_011933351.1	551236	570675	-	neuropeptide-like 1, transcript variant X4
LOC105424935	23.3626	-3.14534	0.583737	-5.38828	7.11339e-08	4.33474e-07	NW_011933207.1	31853	42521	-	uncharacterized LOC105424935, transcript variant X2
LOC105433259	40.2089	-3.14805	0.535379	-5.88004	4.10157e-09	3.00537e-08	NW_011933308.1	334294	342921	-	gamma-aminobutyric acid receptor subunit beta-like, transcript variant X3
LOC112552780	913.828	-3.15742	0.475979	-6.63351	3.27792e-11	3.17467e-10	NW_011933699.1	1024671	1032809	+	cytochrome P450 6k1-like
LOC105433332	1744.98	-3.16028	0.46681	-6.76995	1.28825e-11	1.30978e-10	NW_011933311.1	713809	719270	+	mitotic apparatus protein p62-like, transcript variant X2
LOC105429728	210.56	-3.16711	0.308449	-10.2678	9.83798e-25	3.73843e-23	NW_011933709.1	689411	694132	-	uncharacterized LOC105429728, transcript variant X1
LOC105430635	9.42576	-3.171	0.747462	-4.24235	2.21188e-05	8.87699e-05	NW_011933720.1	266705	269646	+	cuticle protein 64-like
LOC105433181	87.0363	-3.17119	0.912719	-3.47445	0.000511904	0.00158077	NW_011933770.1	634329	636190	+	uncharacterized LOC105433181
LOC105424746	6.99845	-3.17588	1.08558	-2.92551	0.0034389	0.00865056	NW_011933575.1	1064310	1074315	+	uncharacterized LOC105424746
LOC105422552	34.1594	-3.18043	0.654853	-4.85671	1.19351e-06	6.01381e-06	NW_011931347.1	697	3608	-	fatty acid synthase-like
LOC105426461	751.184	-3.18438	0.450836	-7.06329	1.62605e-12	1.83782e-11	NW_011933631.1	180938	188059	-	uncharacterized protein DDB_G0283697, transcript variant X2
LOC105425471	106.611	-3.20398	0.560117	-5.72021	1.06395e-08	7.39336e-08	NW_011933210.1	212479	217162	-	oxysterol-binding protein-related protein 2
LOC105423591	8.03566	-3.21258	1.0642	-3.01878	0.00253794	0.00664583	NW_011933502.1	493474	495322	+	uncharacterized LOC105423591
LOC105423282	316.469	-3.21526	1.2121	-2.65263	0.00798667	0.0181599	NW_011933457.1	143377	144188	+	ornithine decarboxylase-like
LOC105427121	89.3461	-3.2255	0.533579	-6.04502	1.49388e-09	1.16476e-08	NW_011933651.1	772648	776508	+	bone morphogenetic protein 4-like
LOC105425809	401.683	-3.23281	0.676192	-4.78091	1.74506e-06	8.57388e-06	NW_011933214.1	51249	53806	+	fatty acyl-CoA reductase 1-like
LOC105429124	6.26004	-3.24969	1.05214	-3.08865	0.00201069	0.00540372	NW_011933698.1	37174	44325	-	LIM homeobox transcription factor 1-beta-like, transcript variant X3
LOC105426664	10.391	-3.25693	0.945872	-3.44331	0.000574642	0.00175836	NW_011933635.1	567692	597566	+	uncharacterized LOC105426664, transcript variant X1
LOC112552639	23.2831	-3.27637	0.692735	-4.72961	2.24947e-06	1.09162e-05	NW_011933651.1	337090	341313	-	vesicular acetylcholine transporter
LOC105427511	1356.99	-3.28468	0.197743	-16.6108	5.82165e-62	1.79968e-59	NW_011933667.1	375111	378924	+	acyl-CoA Delta(11) desaturase-like
LOC105423470	25.874	-3.32659	0.729625	-4.55932	5.13193e-06	2.34141e-05	NW_011933478.1	2086	3310	-	ejaculatory bulb-specific protein 3-like
LOC105428638	44.4228	-3.33045	0.590828	-5.63692	1.73121e-08	1.16412e-07	NW_011933693.1	490268	495848	+	uncharacterized LOC105428638
LOC105433806	194.952	-3.3337	0.460425	-7.24049	4.47076e-13	5.42851e-12	NW_011933334.1	92048	126351	-	calexcitin-2
LOC105432268	64.6947	-3.33972	0.496893	-6.72121	1.80226e-11	1.79442e-10	NW_011933761.1	879451	883847	-	variant-surface-glycoprotein phospholipase C-like, transcript variant X5
LOC105432156	115.023	-3.35299	0.537901	-6.23348	4.56198e-10	3.81153e-09	NW_011933758.1	1269934	1271243	+	immunoglobulin domain-containing protein oig-4-like
LOC105422253	3279.74	-3.3556	0.12028	-27.8983	2.79487e-171	7.99193e-168	NW_011933377.1	140150	145300	-	b(0,+)-type amino acid transporter 1-like
LOC105426021	2.92803	-3.3844	1.50156	-2.25392	0.0242009	0.0485291	NW_011933217.1	58768	60045	+	putative uncharacterized protein FLJ37770
LOC105426444	155.48	-3.3844	0.862118	-3.92568	8.64855e-05	0.000309906	NW_011933631.1	989	6393	+	cysteine sulfinic acid decarboxylase
LOC105427336	4.0901	-3.40174	1.18066	-2.88122	0.00396138	0.00978703	NW_011933665.1	138244	142418	+	uncharacterized LOC105427336
LOC112552565	12.5298	-3.40688	0.835264	-4.07881	4.52675e-05	0.000170825	NW_011933633.1	169051	206153	-	uncharacterized LOC112552565, transcript variant X2
LOC105424756	2560.35	-3.40806	0.805039	-4.23341	2.3017e-05	9.20518e-05	NW_011933575.1	585034	586709	-	pheromone-binding protein Gp-9-like
LOC112552746	39.3298	-3.43629	0.69686	-4.9311	8.17662e-07	4.24338e-06	NW_011933693.1	495839	498946	+	uncharacterized LOC112552746
LOC105427480	24.7044	-3.45256	0.593646	-5.81586	6.03247e-09	4.33141e-08	NW_011933667.1	1593975	1602599	-	glutathione S-transferase-like, transcript variant X2
LOC105426956	4.36803	-3.45558	1.37806	-2.50757	0.0121565	0.0263906	NW_011933647.1	275823	279882	+	BTB/POZ domain-containing protein KCTD16
LOC105429695	152.356	-3.45715	0.428462	-8.06875	7.1024e-16	1.20173e-14	NW_011933709.1	122729	125860	-	uncharacterized LOC105429695
LOC105423332	97.0645	-3.46476	0.565001	-6.13231	8.66101e-10	6.9519e-09	NW_011933462.1	93280	95518	-	uncharacterized LOC105423332
LOC105432007	79.1195	-3.48652	0.592623	-5.88321	4.02388e-09	2.95411e-08	NW_011933757.1	1435524	1446340	+	guanylate cyclase soluble subunit beta-1
LOC105428641	52.0672	-3.48887	0.563721	-6.18901	6.05441e-10	4.97488e-09	NW_011933693.1	730237	738223	+	serine-enriched protein
LOC105432544	6.23757	-3.49957	1.32588	-2.63944	0.00830424	0.018805	NW_011933303.1	692167	694499	-	odorant receptor 13a-like
LOC105431948	3.11558	-3.51046	1.51324	-2.31983	0.0203499	0.0415795	NW_011933303.1	575954	578945	-	uncharacterized LOC105431948
LOC105426391	156.653	-3.52337	0.243381	-14.4768	1.69923e-47	2.52412e-45	NW_011933624.1	863589	865653	-	uncharacterized LOC105426391
LOC105423328	192.488	-3.52964	0.661746	-5.33383	9.61642e-08	5.72878e-07	NW_011933462.1	85420	87002	-	uncharacterized LOC105423328
LOC105431560	70.171	-3.53276	0.966536	-3.65507	0.000257111	0.000839278	NW_011933745.1	437457	442088	-	insulin-like growth factor-binding protein complex acid labile subunit
LOC105423297	31.244	-3.55225	0.804588	-4.41499	1.01015e-05	4.33061e-05	NW_011931802.1	121	3376	-	cytochrome P450 4C1-like
LOC105422441	352.919	-3.55513	0.228076	-15.5875	8.85272e-55	1.84104e-52	NW_011933392.1	813579	816930	-	protein sister of odd and bowel
LOC105427037	38.7389	-3.56988	0.714638	-4.99537	5.87228e-07	3.11103e-06	NW_011933649.1	540888	544560	+	maltase 1-like
LOC105430632	56.2733	-3.63877	0.596808	-6.09705	1.08043e-09	8.54633e-09	NW_011933720.1	243888	253500	+	cubilin-like, transcript variant X1
LOC105430214	186.373	-3.63974	0.48441	-7.51374	5.74605e-14	7.73898e-13	NW_011933717.1	1140921	1170061	+	transcription factor Sp9
LOC105434241	589.842	-3.63991	0.331193	-10.9903	4.25499e-28	2.11602e-26	NW_011933351.1	446538	447935	+	enhancer of split mbeta protein-like
LOC105430722	3.26842	-3.64654	1.34752	-2.70611	0.00680768	0.0158168	NW_011933721.1	260029	260639	-	uncharacterized LOC105430722
LOC105432846	2.00802	-3.6472	1.55347	-2.34778	0.0188856	0.0388933	NW_011933305.1	137844	138840	-	uncharacterized LOC105432846
LOC105430283	32.7085	-3.66143	0.621801	-5.88843	3.89888e-09	2.86787e-08	NW_011933717.1	2475849	2483759	+	JNK-interacting protein 1, transcript variant X1
LOC105426369	4.84461	-3.662	1.38516	-2.64374	0.00819957	0.0185974	NW_011933624.1	720619	724407	+	sodium-dependent nutrient amino acid transporter 1-like
LOC105431366	17.5842	-3.67406	0.876886	-4.18989	2.79086e-05	0.000109848	NW_011933738.1	314677	321808	+	coiled-coil domain-containing protein 170
LOC105423330	61.7969	-3.67462	0.646249	-5.68608	1.29988e-08	8.89765e-08	NW_011933462.1	89796	91863	-	uncharacterized LOC105423330, transcript variant X1
LOC105423915	270.846	-3.71558	1.1677	-3.18197	0.00146275	0.00409069	NW_011933534.1	1087806	1091563	-	uncharacterized LOC105423915
LOC105429696	3.55789	-3.71776	1.29954	-2.86082	0.00422552	0.0103671	NW_011933709.1	137645	143998	+	vesicular glutamate transporter 1, transcript variant X1
LOC105423832	31.5071	-3.71993	0.83591	-4.45016	8.58076e-06	3.74606e-05	NW_011933532.1	128516	140821	+	uncharacterized LOC105423832
LOC105430637	2.10463	-3.72314	1.62472	-2.29156	0.021931	0.0444291	NW_011933720.1	275827	276477	+	cuticle protein 38
LOC105424198	289.706	-3.73109	0.375258	-9.94275	2.71241e-23	9.34474e-22	NW_011933555.1	136351	157940	-	anoctamin-8-like, transcript variant X5
LOC105426262	3.31546	-3.74089	1.52105	-2.4594	0.0139168	0.0297236	NW_011933224.1	59875	69542	+	ataxin-8-like
LOC112552609	3.70655	-3.74222	1.33803	-2.79681	0.00516092	0.0123495	NW_011933647.1	30656	41841	+	odorant receptor 67c-like
LOC105424996	2396.24	-3.74225	0.17565	-21.3051	1.01827e-100	1.16469e-97	NW_011933583.1	149171	172465	+	pseudouridine-metabolizing bifunctional protein C1861.05, transcript variant X2
LOC105431924	10.5735	-3.7454	0.926971	-4.04048	5.33423e-05	0.000198739	NW_011933303.1	411629	415892	+	solute carrier family 35 member F2-like
LOC105431866	8.71845	-3.75178	0.871867	-4.30316	1.6838e-05	6.91042e-05	NW_011933750.1	448020	455648	+	uncharacterized LOC105431866
LOC112553005	74.8097	-3.75977	1.11721	-3.36532	0.000764535	0.00227847	NW_011933766.1	212667	214767	+	uncharacterized LOC112553005
LOC112552270	11.9006	-3.77566	0.902497	-4.18358	2.86958e-05	0.000112675	NW_011933406.1	393305	424335	-	uncharacterized LOC112552270
LOC105426307	122.817	-3.79317	0.859791	-4.41173	1.02547e-05	4.39135e-05	NW_011933624.1	110476	113216	+	hyaluronidase-like
LOC105429451	5.46983	-3.79329	1.22049	-3.10801	0.00188354	0.00509795	NW_011933704.1	361627	362810	-	uncharacterized LOC105429451
LOC105428642	12.9539	-3.79981	0.868278	-4.37626	1.20733e-05	5.1146e-05	NW_011933693.1	740188	746587	+	alpha-amylase 1-like
LOC105428257	240.591	-3.81021	0.425639	-8.95174	3.49911e-19	8.32076e-18	NW_011933682.1	804738	818186	-	uncharacterized LOC105428257, transcript variant X2
LOC105426725	11.1749	-3.83037	0.901148	-4.25055	2.13245e-05	8.5793e-05	NW_011933636.1	334477	355199	-	uncharacterized LOC105426725, transcript variant X1
LOC105426001	59.0386	-3.84004	0.499889	-7.68179	1.56881e-14	2.25428e-13	NW_011933614.1	584026	596306	+	allatostatin C-like
LOC105433445	209.01	-3.84014	0.376862	-10.1898	2.20273e-24	8.15368e-23	NW_011933315.1	20154	43117	+	nuclear receptor subfamily 2 group E member 1
LOC105423019	169.462	-3.84716	0.414148	-9.28933	1.55256e-20	4.27908e-19	NW_011933430.1	54977	62365	+	neuronal acetylcholine receptor subunit alpha-6-like
LOC105426803	101.555	-3.8548	0.438397	-8.79293	1.45714e-18	3.23627e-17	NW_011933638.1	299883	304566	+	ITG-like peptide, transcript variant X3
LOC105425137	22.7219	-3.85842	0.672129	-5.74059	9.43472e-09	6.62457e-08	NW_011933589.1	97417	117538	+	short neuropeptide F-like
LOC105433376	133.014	-3.86849	0.413332	-9.35928	8.0282e-21	2.26732e-19	NW_011933313.1	106283	111773	+	sodium- and chloride-dependent GABA transporter 1-like, transcript variant X2
LOC105428445	12.6914	-3.87047	0.854945	-4.52716	5.97813e-06	2.68043e-05	NW_011933686.1	1726950	1731798	-	uncharacterized LOC105428445
LOC105433807	5.81493	-3.88769	1.2017	-3.23516	0.00121575	0.00348166	NW_011933334.1	141173	149031	+	uncharacterized LOC105433807, transcript variant X2
LOC105434365	7.81003	-3.89861	0.98667	-3.95128	7.77341e-05	0.000279862	NW_011933354.1	1052268	1120221	+	LIM domain only protein 3-like
LOC105426716	185.888	-3.90828	0.45932	-8.50884	1.75675e-17	3.45253e-16	NW_011933232.1	71746	85403	+	neuroendocrine convertase 2-like
LOC105431994	5.72897	-3.91231	1.12446	-3.47928	0.00050276	0.00155364	NW_011933757.1	1031125	1038224	+	uncharacterized LOC105431994
LOC105423538	2.38091	-3.91914	1.49585	-2.62001	0.00879284	0.0197472	NW_011933499.1	13680	14968	-	uncharacterized LOC105423538, transcript variant X2
LOC105428922	92.9901	-3.92707	1.38353	-2.83843	0.00453354	0.0110259	NW_011933695.1	2262321	2267403	-	solute carrier organic anion transporter family member 2A1
LOC105427626	2.5087	-3.98199	1.54302	-2.58066	0.00986126	0.0218634	NW_011933669.1	1083210	1085659	+	probable H/ACA ribonucleoprotein complex subunit 1-like protein
LOC105429210	520.506	-3.98575	1.05078	-3.79312	0.000148766	0.000507178	NW_011933699.1	1013681	1017339	+	cytochrome P450 6k1-like, transcript variant X1
LOC112553006	14.9192	-3.98997	0.816118	-4.88896	1.01368e-06	5.1738e-06	NW_011933307.1	450787	451430	-	uncharacterized LOC112553006
LOC105434002	2.57628	-4.01691	1.50222	-2.67399	0.00749538	0.0171808	NW_011933339.1	81257	93230	-	neurexin-2-like
LOC105434318	2091.07	-4.03828	0.13487	-29.9421	5.57923e-197	2.12718e-193	NW_011933354.1	402641	433993	-	transcription factor EC
LOC105428201	567.147	-4.05479	0.799493	-5.07171	3.94265e-07	2.15461e-06	NW_011933681.1	853622	868560	-	acyl-CoA synthetase short-chain family member 3, mitochondrial, transcript variant X1
LOC105421972	30.2681	-4.05554	1.04139	-3.89435	9.84633e-05	0.000348568	NW_011931055.1	25263	28493	-	uncharacterized LOC105421972, transcript variant X2
LOC105432155	88.8141	-4.06355	1.0092	-4.02652	5.66076e-05	0.00020982	NW_011933758.1	1271355	1272899	+	immunoglobulin domain-containing protein oig-4-like
LOC105424209	17.6384	-4.06822	0.736779	-5.52162	3.35881e-08	2.15953e-07	NW_011933555.1	318469	326102	-	protein SCAI, transcript variant X2
LOC105429615	45.0984	-4.07312	0.653256	-6.2351	4.515e-10	3.7778e-09	NW_011933706.1	178589	183583	+	uncharacterized LOC105429615
LOC105423760	693.485	-4.09539	0.24941	-16.4203	1.36803e-60	3.64908e-58	NW_011933514.1	182276	232385	-	uncharacterized LOC105423760, transcript variant X2
LOC105433968	7.89277	-4.12108	1.19062	-3.46128	0.000537612	0.00165524	NW_011933339.1	234402	249507	-	protein Wnt-11b-1-like
LOC105431612	904.896	-4.13892	0.582335	-7.10746	1.182e-12	1.37675e-11	NW_011933745.1	819320	828797	+	uncharacterized LOC105431612
LOC105430862	39.132	-4.1643	0.633511	-6.57336	4.91908e-11	4.6538e-10	NW_011933725.1	683095	686724	+	homeobox protein aristaless
LOC112552882	1.64141	-4.16495	1.84742	-2.25447	0.0241666	0.0484688	NW_011933721.1	260380	262540	-	transcription initiation factor TFIID subunit 3-like
LOC105422792	1.67162	-4.18814	1.78212	-2.35008	0.0187692	0.0387163	NW_011931475.1	6	640	+	fatty acid synthase-like
LOC105432508	880.957	-4.25197	0.252527	-16.8377	1.29179e-63	4.47742e-61	NW_011933763.1	3739397	3794157	-	uncharacterized LOC105432508
LOC112552445	3.08372	-4.26125	1.44649	-2.94592	0.00321991	0.00815892	NW_011933573.1	542395	544539	-	SUN domain-containing protein 2-like, transcript variant X2
LOC105425366	403.084	-4.29016	0.345953	-12.401	2.5809e-35	1.99462e-33	NW_011933593.1	37039	41387	+	uncharacterized LOC105425366
LOC105423329	124.088	-4.30991	1.08628	-3.96759	7.26045e-05	0.000262718	NW_011933462.1	87745	89623	-	uncharacterized LOC105423329
LOC105423112	5.00189	-4.34133	1.4095	-3.08005	0.00206969	0.00553887	NW_011933439.1	265809	274596	-	tumor necrosis factor receptor superfamily member 4-like, transcript variant X1
LOC105424894	315.416	-4.34691	0.220476	-19.716	1.57119e-86	1.18586e-83	NW_011933577.1	1085429	1102938	+	uncharacterized LOC105424894
LOC105430638	57.0931	-4.3483	0.425404	-10.2216	1.58727e-24	5.93307e-23	NW_011933720.1	278348	279369	+	uncharacterized LOC105430638
LOC105429175	4355.83	-4.36623	1.11837	-3.90409	9.45806e-05	0.000336384	NW_011933699.1	73206	81193	-	aminopeptidase N, transcript variant X1
LOC105432487	3.275	-4.37509	1.73434	-2.52263	0.0116482	0.0254162	NW_011933763.1	2922482	2982639	+	trace amine-associated receptor 9, transcript variant X2
LOC105433532	10.7658	-4.38007	0.910158	-4.81243	1.49107e-06	7.3703e-06	NW_011930187.1	518	1947	+	uncharacterized LOC105433532
[truncated: 53 more rows]
