# Supplementary material for: Age, Caste, and Social Context Shape Ovarian Morphology and Transcriptomic Profiles in Red Harvester Ants (Pogonomyrmex barbatus)
Source: Research Square preprint supplement (doi:10.21203/rs.3.rs-6933990/v1), 2025-06-27
Supplement: Supplementary file 3 [file 6192001fcc1ee0af07493a0e.xlsx]

## Sheet: UP Functional Annotation Chart
Category	Term	Count	%	PValue	Genes	List Total	Pop Hits	Pop Total	Fold Enrichment	Bonferroni	Benjamini	FDR
GOTERM_BP_DIRECT	GO:0043171~peptide catabolic process	52	5.77137	2.16422e-43	LOC105424668, LOC105422569, LOC105422723, LOC105422926, LOC105430903, LOC105427775, LOC105425798, LOC105422126, LOC105423370, LOC105422282, LOC105431282, LOC105433948, LOC105423623, LOC105422459, LOC105422812, LOC105423902, LOC105427424, LOC105426610, LOC105425760, LOC105424992, LOC112552700, LOC105432323, LOC105426291, LOC105426297, LOC105427265, LOC105426298, LOC105426295, LOC105426296, LOC1054…	511	72	7288	10.3005	9.19793e-41	9.17629e-41	8.83002e-41
GOTERM_MF_DIRECT	GO:0042277~peptide binding	42	4.66149	2.10942e-30	LOC105424668, LOC105422723, LOC105422569, LOC105422926, LOC105430903, LOC105427775, LOC105426304, LOC105422126, LOC105423370, LOC105427277, LOC105427276, LOC105422282, LOC112552297, LOC105431282, LOC105422260, LOC105432117, LOC105430575, LOC105423623, LOC105423208, LOC105422712, LOC105422459, LOC105422812, LOC105423408, LOC105423902, LOC105430715, LOC112552919, LOC112552680, LOC105427424, LOC1054…	592	65	7798	8.51133	6.96108e-28	6.96108e-28	6.60248e-28
GOTERM_MF_DIRECT	GO:0004496~mevalonate kinase activity	28	3.10766	1.12224e-28	LOC105423755, LOC105430627, LOC105423753, LOC105433102, LOC105430692, LOC105433100, LOC105430690, LOC105430691, LOC105432258, LOC105430630, LOC105430631, LOC105428853, LOC105428852, LOC105428977, LOC105430684, LOC105431894, LOC105428850, LOC112552880, LOC105430625, LOC105430626, LOC105423719, LOC105430623, LOC105430689, LOC105432724, LOC105430624, LOC105430621, LOC105430688, LOC105430686	592	29	7798	12.7181	3.7034e-26	1.8517e-26	1.75631e-26
GOTERM_MF_DIRECT	GO:0070006~metalloaminopeptidase activity	41	4.5505	2.45038e-28	LOC105424668, LOC105422723, LOC105422569, LOC105422926, LOC105430903, LOC105427775, LOC105426304, LOC105422126, LOC105423370, LOC105427277, LOC105427276, LOC105422282, LOC112552297, LOC105431282, LOC105422260, LOC105432117, LOC105423623, LOC105423208, LOC105422712, LOC105422459, LOC105422812, LOC105423408, LOC105423902, LOC105430715, LOC112552919, LOC112552680, LOC105427424, LOC105426610, LOC1054…	592	67	7798	8.06066	8.08624e-26	2.69541e-26	2.55656e-26
GOTERM_BP_DIRECT	GO:0019287~isopentenyl diphosphate biosynthetic process, mevalonate pathway	28	3.10766	8.10813e-28	LOC105423755, LOC105430627, LOC105423753, LOC105433102, LOC105430692, LOC105433100, LOC105430690, LOC105430691, LOC105432258, LOC105430630, LOC105430631, LOC105428853, LOC105428852, LOC105428977, LOC105430684, LOC105431894, LOC105428850, LOC112552880, LOC105430625, LOC105430626, LOC105423719, LOC105430623, LOC105430689, LOC105432724, LOC105430624, LOC105430621, LOC105430688, LOC105430686	511	31	7288	12.882	3.44595e-25	1.71892e-25	1.65406e-25
GOTERM_BP_DIRECT	GO:0008299~isoprenoid biosynthetic process	28	3.10766	1.71902e-24	LOC105423755, LOC105430627, LOC105423753, LOC105433102, LOC105430692, LOC105433100, LOC105430690, LOC105430691, LOC105432258, LOC105430630, LOC105430631, LOC105428853, LOC105428852, LOC105428977, LOC105430684, LOC105431894, LOC105428850, LOC112552880, LOC105430625, LOC105430626, LOC105423719, LOC105430623, LOC105430689, LOC105432724, LOC105430624, LOC105430621, LOC105430688, LOC105430686	511	36	7288	11.0928	7.30582e-22	2.42954e-22	2.33786e-22
GOTERM_BP_DIRECT	GO:0006695~cholesterol biosynthetic process	24	2.66371	1.18109e-22	LOC105423755, LOC105430627, LOC105428853, LOC105428852, LOC105428977, LOC105423753, LOC105430684, LOC105431894, LOC105433102, LOC105430692, LOC105433100, LOC105430690, LOC105430691, LOC112552880, LOC105430625, LOC105430626, LOC105423719, LOC105430689, LOC105430623, LOC105430624, LOC105432724, LOC105430621, LOC105430630, LOC105430631	511	28	7288	12.2248	5.01961e-20	1.25195e-20	1.20471e-20
GOTERM_BP_DIRECT	GO:0006508~proteolysis	63	6.99223	3.30391e-16	LOC105424668, LOC105422569, LOC105422723, LOC105422926, LOC105430903, LOC105422849, LOC105427775, LOC105422126, LOC105433784, LOC105423370, LOC105430350, LOC105422282, LOC105431282, LOC105433948, LOC105432899, LOC105423623, LOC105422459, LOC105422812, LOC105423902, LOC105427424, LOC105426610, LOC105424992, LOC105422852, LOC105432323, LOC105426291, LOC105426297, LOC105427265, LOC105426298, LOC1054…	511	288	7288	3.11986	1.41553e-13	2.80172e-14	2.69599e-14
GOTERM_CC_DIRECT	GO:0005615~extracellular space	68	7.54717	3.34638e-16	LOC105423217, LOC105424668, LOC105422569, LOC105422723, LOC105422926, LOC105430903, LOC105422849, LOC105427775, LOC105423214, LOC105422126, LOC105433544, LOC105433024, LOC105423370, LOC105427012, LOC105422282, LOC112552352, LOC105431282, LOC105423623, LOC105422459, LOC105422812, LOC105423902, LOC105431629, LOC105427424, LOC105426610, LOC105424992, LOC105425288, LOC105427547, LOC105423226, LOC1054…	595	322	8362	2.96788	5.39568e-14	5.42114e-14	4.98611e-14
KEGG_PATHWAY	pbar00900:Terpenoid backbone biosynthesis	22	2.44173	5.21428e-15	LOC105423755, LOC105430937, LOC105428853, LOC105428852, LOC105428977, LOC105423753, LOC105433698, LOC105430684, LOC105431894, LOC105430692, LOC105433100, LOC105428850, LOC105430581, LOC105430625, LOC105430689, LOC105430624, LOC105432724, LOC105430688, LOC105432258, LOC105430630, LOC105430631, LOC105430686	172	47	3061	8.33028	4.95715e-13	5.00571e-13	4.58857e-13
GOTERM_MF_DIRECT	GO:0008270~zinc ion binding	72	7.99112	4.79962e-13	LOC105424668, LOC105422569, LOC105422723, LOC105422926, LOC105430903, LOC105422849, LOC105427775, LOC112552272, LOC105424467, LOC105422126, LOC105429199, LOC105423370, LOC105434277, LOC105429196, LOC105422282, LOC105429197, LOC105431282, LOC105429198, LOC105433948, LOC105432019, LOC105423623, LOC105422459, LOC105422812, LOC105422614, LOC105423902, LOC105427424, LOC105426610, LOC105426695, LOC1054…	592	383	7798	2.47625	1.58383e-10	3.95969e-11	3.7557e-11
KEGG_PATHWAY	pbar01100:Metabolic pathways	98	10.8768	1.10986e-11	LOC105423652, LOC105426645, LOC105430593, LOC105433100, LOC105433989, LOC105432415, LOC105432019, LOC105430630, LOC105432258, LOC105430631, LOC105422336, LOC105422618, LOC105428555, LOC105433455, LOC105429762, LOC105428157, LOC105431153, LOC105430581, LOC105431030, LOC105430625, LOC105433617, LOC105430624, LOC105431710, LOC105427180, LOC105422866, LOC105422748, LOC105428843, LOC105428205, LOC1054…	172	989	3061	1.76346	1.05437e-09	5.32735e-10	4.8834e-10
KEGG_PATHWAY	pbar04146:Peroxisome	24	2.66371	1.34028e-10	LOC105423755, LOC105428843, LOC105428853, LOC105428852, LOC105428977, LOC105423753, LOC105430684, LOC105431894, LOC105430692, LOC105433100, LOC105428850, LOC105432099, LOC105432096, LOC105430625, LOC105430689, LOC105430624, LOC105432724, LOC105430688, LOC105432258, LOC105430630, LOC105434327, LOC105432610, LOC105430631, LOC105430686	172	88	3061	4.85359	1.27327e-08	4.28891e-09	3.9315e-09
GOTERM_CC_DIRECT	GO:0005737~cytoplasm	169	18.7569	3.45233e-10	LOC105422569, LOC105424627, LOC105422723, LOC105430627, LOC105430903, LOC105426123, LOC105424585, LOC105423895, LOC105423652, LOC105429359, LOC105433102, LOC105432893, LOC105423370, LOC105433100, LOC105434277, LOC105427694, LOC105422282, LOC105431282, LOC105426362, LOC105433989, LOC105432019, LOC105430630, LOC105432258, LOC105430631, LOC105423943, LOC105422612, LOC105422459, LOC105422618, LOC1054…	595	1528	8362	1.55438	5.59277e-08	2.79639e-08	2.57198e-08
KEGG_PATHWAY	pbar00480:Glutathione metabolism	17	1.88679	7.78228e-08	LOC105424668, LOC105422812, LOC105430715, LOC105422926, LOC105422618, LOC105427775, LOC105427427, LOC105426304, LOC105432323, LOC105426291, LOC105426297, LOC105423281, LOC105426680, LOC105426295, LOC105426296, LOC105427263, LOC105422927	172	60	3061	5.04234	7.39314e-06	1.86775e-06	1.7121e-06
GOTERM_CC_DIRECT	GO:0098552~side of membrane	18	1.99778	9.38918e-08	LOC105424668, LOC105423208, LOC105422569, LOC105422459, LOC105422812, LOC105423408, LOC105422926, LOC105428205, LOC105427424, LOC105424992, LOC105426291, LOC105427276, LOC105427265, LOC112552297, LOC105426295, LOC105427263, LOC105422927, LOC105430723	595	54	8362	4.68459	1.52104e-05	5.07016e-06	4.66329e-06
GOTERM_CC_DIRECT	GO:0072686~mitotic spindle	10	1.10988	6.2918e-07	LOC105423239, LOC105422612, LOC105427386, LOC105429185, LOC105429527, LOC105426123, LOC105424685, LOC105424497, LOC105425645, LOC105426998	595	17	8362	8.26693	0.000101922	2.54818e-05	2.34369e-05
GOTERM_CC_DIRECT	GO:0005876~spindle microtubule	8	0.887902	1.0366e-05	LOC105427806, LOC105423239, LOC105422612, LOC105429185, LOC105429527, LOC105426123, LOC105426998, LOC105431214	595	13	8362	8.64848	0.0016779	0.000335859	0.000308908
GOTERM_MF_DIRECT	GO:0004177~aminopeptidase activity	9	0.99889	1.36564e-05	LOC112552700, LOC105422614, LOC105433948, LOC105428205, LOC105422927, LOC105423067, LOC112552272, LOC105422452, LOC112552308	592	17	7798	6.97357	0.00449651	0.000878765	0.000833495
GOTERM_MF_DIRECT	GO:0005524~ATP binding	90	9.9889	1.59775e-05	LOC105422528, LOC105430627, LOC105424462, LOC105426123, LOC105425876, LOC105426006, LOC105428185, LOC105430431, LOC105433102, LOC105434114, LOC105433100, LOC112552352, LOC105433989, LOC105431449, LOC105432258, LOC105430630, LOC105430356, LOC105430631, LOC105423943, LOC105422612, LOC105430738, LOC105432717, LOC105429527, LOC105426410, LOC105427344, LOC105426578, LOC105426535, LOC105432123, LOC1054…	592	764	7798	1.55171	0.00525876	0.000878765	0.000833495
GOTERM_BP_DIRECT	GO:0051301~cell division	18	1.99778	2.02252e-05	LOC105428700, LOC105429527, LOC105428236, LOC105425232, LOC105424497, LOC105424500, LOC105426998, LOC105429567, LOC105426017, LOC105427800, LOC105429437, LOC105431088, LOC105428084, LOC105434013, LOC105427386, LOC105422292, LOC105434077, LOC105432109	511	78	7288	3.29128	0.00855898	0.00142925	0.00137532
GOTERM_CC_DIRECT	GO:0016020~membrane	173	19.2009	5.73338e-05	LOC105422723, LOC105426806, LOC105430903, LOC105426885, LOC105425431, LOC105428429, LOC105423774, LOC105423256, LOC105429359, LOC105423533, LOC105429199, LOC105430112, LOC105425390, LOC112552797, LOC105423370, LOC105432099, LOC105429196, LOC105432096, LOC105422282, LOC105429197, LOC105431282, LOC105432492, LOC105429198, LOC105430911, LOC105433867, LOC105432415, LOC105432533, LOC105423701, LOC1054…	595	1868	8362	1.30155	0.00924534	0.00154801	0.00142379
GOTERM_MF_DIRECT	GO:0008237~metallopeptidase activity	11	1.22087	5.96e-05	LOC105423623, LOC105423703, LOC105422614, LOC105433948, LOC105428205, LOC105422927, LOC105423067, LOC112552272, LOC105422452, LOC112552291, LOC112552308	592	31	7798	4.67404	0.0194764	0.00253182	0.0024014
GOTERM_MF_DIRECT	GO:0016788~hydrolase activity, acting on ester bonds	7	0.776915	6.13776e-05	LOC105427020, LOC105434334, LOC105426187, LOC105427021, LOC105426695, LOC105426666, LOC105423995	592	11	7798	8.38237	0.0200515	0.00253182	0.0024014
GOTERM_BP_DIRECT	GO:0051231~spindle elongation	6	0.665927	7.72034e-05	LOC105423239, LOC105422612, LOC105429185, LOC105429527, LOC105426123, LOC105431226	511	8	7288	10.6967	0.0322802	0.00467632	0.00449986
GOTERM_BP_DIRECT	GO:0006567~threonine catabolic process	5	0.554939	0.000112001	LOC105431384, LOC105432044, LOC105428221, LOC105428154, LOC105428555	511	5	7288	14.2622	0.0464878	0.00593605	0.00571205
GOTERM_CC_DIRECT	GO:0005829~cytosol	58	6.43729	0.000122824	LOC105430627, LOC105422563, LOC105425798, LOC105433102, LOC105433100, LOC105433948, LOC105433706, LOC105433989, LOC105432258, LOC105430630, LOC105430399, LOC105430631, LOC105432717, LOC105434261, LOC105425760, LOC112552700, LOC105433013, LOC105428157, LOC105422490, LOC105430625, LOC105430626, LOC105430623, LOC112552705, LOC105430624, LOC105432724, LOC105430621, LOC105423755, LOC105428205, LOC1054…	595	490	8362	1.66351	0.019702	0.0028425	0.0026144
GOTERM_BP_DIRECT	GO:0090307~mitotic spindle assembly	6	0.665927	0.00016372	LOC105423239, LOC105422612, LOC105429185, LOC105429527, LOC105426123, LOC105423895	511	9	7288	9.50815	0.0672208	0.00771304	0.00742199
GOTERM_MF_DIRECT	GO:0008017~microtubule binding	17	1.88679	0.000269796	LOC105423943, LOC105423239, LOC105422612, LOC105424627, LOC105429527, LOC105426123, LOC105426112, LOC105426266, LOC105426998, LOC105426535, LOC105433522, LOC105432389, LOC105433510, LOC105432046, LOC105428651, LOC105429185, LOC105431226	592	80	7798	2.79911	0.0851954	0.00989253	0.00938291
GOTERM_BP_DIRECT	GO:0051603~proteolysis involved in protein catabolic process	9	0.99889	0.000275369	LOC105433764, LOC105423075, LOC105428242, LOC112552705, LOC105425760, LOC105425776, LOC105425798, LOC105427238, LOC105424215	511	26	7288	4.93693	0.110457	0.00897109	0.00863256
GOTERM_BP_DIRECT	GO:0097112~gamma-aminobutyric acid receptor clustering	5	0.554939	0.000317374	LOC105432717, LOC105432716, LOC105432757, LOC105433989, LOC105434008	511	6	7288	11.8852	0.126201	0.00897109	0.00863256
GOTERM_BP_DIRECT	GO:0098970~postsynaptic neurotransmitter receptor diffusion trapping	5	0.554939	0.000317374	LOC105432717, LOC105432716, LOC105432757, LOC105433989, LOC105434008	511	6	7288	11.8852	0.126201	0.00897109	0.00863256
GOTERM_BP_DIRECT	GO:0018315~molybdenum incorporation into molybdenum-molybdopterin complex	5	0.554939	0.000317374	LOC105432717, LOC105432716, LOC105432757, LOC105433989, LOC105434008	511	6	7288	11.8852	0.126201	0.00897109	0.00863256
GOTERM_BP_DIRECT	GO:0072579~glycine receptor clustering	5	0.554939	0.000317374	LOC105432717, LOC105432716, LOC105432757, LOC105433989, LOC105434008	511	6	7288	11.8852	0.126201	0.00897109	0.00863256
GOTERM_BP_DIRECT	GO:0007529~establishment of synaptic specificity at neuromuscular junction	5	0.554939	0.000317374	LOC105432717, LOC105432716, LOC105432757, LOC105433989, LOC105434008	511	6	7288	11.8852	0.126201	0.00897109	0.00863256
GOTERM_CC_DIRECT	GO:0051233~spindle midzone	5	0.554939	0.000336887	LOC105427707, LOC105427806, LOC105428700, LOC105431214, LOC105424677	595	6	8362	11.7115	0.0531218	0.00606396	0.00557734
GOTERM_CC_DIRECT	GO:0099634~postsynaptic specialization membrane	5	0.554939	0.000336887	LOC105432717, LOC105432716, LOC105432757, LOC105433989, LOC105434008	595	6	8362	11.7115	0.0531218	0.00606396	0.00557734
GOTERM_MF_DIRECT	GO:0061599~molybdopterin molybdotransferase activity	5	0.554939	0.000433031	LOC105432717, LOC105432716, LOC105432757, LOC105433989, LOC105434008	592	6	7798	10.9769	0.133186	0.0119084	0.0112949
GOTERM_MF_DIRECT	GO:0008574~plus-end-directed microtubule motor activity	5	0.554939	0.000433031	LOC105423239, LOC105422612, LOC105429185, LOC105429527, LOC105426123	592	6	7798	10.9769	0.133186	0.0119084	0.0112949
GOTERM_MF_DIRECT	GO:0061598~molybdopterin adenylyltransferase activity	5	0.554939	0.000433031	LOC105432717, LOC105432716, LOC105432757, LOC105433989, LOC105434008	592	6	7798	10.9769	0.133186	0.0119084	0.0112949
GOTERM_BP_DIRECT	GO:0007018~microtubule-based movement	12	1.33185	0.000539678	LOC105423943, LOC105423239, LOC105422612, LOC105433510, LOC105427969, LOC105429185, LOC105429527, LOC105426266, LOC105426123, LOC105426112, LOC105431226, LOC105426535	511	50	7288	3.42294	0.205009	0.0143015	0.0137618
GOTERM_CC_DIRECT	GO:0099572~postsynaptic specialization	5	0.554939	0.000741891	LOC105432717, LOC105432716, LOC105432757, LOC105433989, LOC105434008	595	7	8362	10.0384	0.113284	0.0120186	0.0110542
GOTERM_BP_DIRECT	GO:0007052~mitotic spindle organization	7	0.776915	0.00102342	LOC105427806, LOC105432046, LOC105428651, LOC105426410, LOC105431226, LOC105425645, LOC105431214	511	18	7288	5.54642	0.352849	0.0255253	0.0245621
GOTERM_BP_DIRECT	GO:0042759~long-chain fatty acid biosynthetic process	4	0.443951	0.00129206	LOC105433819, LOC105428276, LOC105428275, LOC105422665	511	4	7288	14.2622	0.422751	0.0304353	0.0292868
KEGG_PATHWAY	pbar04814:Motor proteins	15	1.66482	0.00132878	LOC105423943, LOC105423239, LOC105422612, LOC105427969, LOC105429527, LOC105426123, LOC105423695, LOC105426112, LOC105426266, LOC105426578, LOC105426535, LOC105428185, LOC105434114, LOC105429185, LOC105431226	172	102	3061	2.61713	0.118666	0.0255127	0.0233866
GOTERM_CC_DIRECT	GO:0032133~chromosome passenger complex	4	0.443951	0.00135141	LOC105427806, LOC105434048, LOC105428700, LOC105431214	595	4	8362	14.0538	0.196739	0.018244	0.01678
GOTERM_CC_DIRECT	GO:0031616~spindle pole centrosome	4	0.443951	0.00135141	LOC105427806, LOC105432046, LOC105428651, LOC105431214	595	4	8362	14.0538	0.196739	0.018244	0.01678
GOTERM_MF_DIRECT	GO:0004497~monooxygenase activity	16	1.7758	0.00143199	LOC105422336, LOC105424757, LOC105423309, LOC105422319, LOC105431083, LOC105428655, LOC105424055, LOC105426322, LOC105434090, LOC105426293, LOC105428273, LOC105426294, LOC105431177, LOC105428101, LOC105428055, LOC105433831	592	84	7798	2.50901	0.376806	0.0363506	0.034478
GOTERM_MF_DIRECT	GO:0017040~N-acylsphingosine amidohydrolase activity	4	0.443951	0.00163508	LOC105433819, LOC105428276, LOC105428275, LOC105422665	592	4	7798	13.1723	0.417263	0.0385412	0.0365558
KEGG_PATHWAY	pbar00790:Folate biosynthesis	7	0.776915	0.00202465	LOC105433455, LOC105432716, LOC105432757, LOC105433989, LOC105423311, LOC105423652, LOC105434008	172	25	3061	4.98302	0.175136	0.0323944	0.0296949
KEGG_PATHWAY	pbar00260:Glycine, serine and threonine metabolism	7	0.776915	0.00251211	LOC105431892, LOC105431384, LOC105432044, LOC105428221, LOC105428463, LOC105428555, LOC105422187	172	26	3061	4.79137	0.212546	0.0344518	0.0315808
GOTERM_MF_DIRECT	GO:0020037~heme binding	19	2.10877	0.00264541	LOC105424757, LOC105423309, LOC105431083, LOC105428655, LOC105424055, LOC105426322, LOC112553072, LOC105423256, LOC105434090, LOC105426293, LOC105428273, LOC105426294, LOC105432893, LOC105431177, LOC105428101, LOC105428055, LOC105433804, LOC105433831, LOC105432446	592	116	7798	2.15753	0.582781	0.0581991	0.055201
GOTERM_CC_DIRECT	GO:0000786~nucleosome	8	0.887902	0.00279773	LOC105429023, LOC105424220, LOC105434150, LOC105433648, LOC105424224, LOC105424964, LOC105433754, LOC105429525	595	28	8362	4.01537	0.364833	0.034864	0.0320662
GOTERM_BP_DIRECT	GO:0046514~ceramide catabolic process	4	0.443951	0.00306216	LOC105433819, LOC105428276, LOC105428275, LOC105422665	511	5	7288	11.4098	0.728397	0.0683344	0.0657558
GOTERM_BP_DIRECT	GO:0006777~Mo-molybdopterin cofactor biosynthetic process	5	0.554939	0.0035418	LOC105432717, LOC105432716, LOC105432757, LOC105433989, LOC105434008	511	10	7288	7.13112	0.778634	0.0750861	0.0722527
GOTERM_BP_DIRECT	GO:0000281~mitotic cytokinesis	6	0.665927	0.00376099	LOC105427707, LOC105434048, LOC105423695, LOC105425645, LOC105426624, LOC105424677	511	16	7288	5.34834	0.798393	0.0759362	0.0730707
GOTERM_MF_DIRECT	GO:0016705~oxidoreductase activity, acting on paired donors, with incorporation or reduction of molecular oxygen	14	1.55383	0.00429088	LOC105424757, LOC105423309, LOC105431083, LOC105428655, LOC105424055, LOC105426322, LOC105434090, LOC105426293, LOC105428273, LOC105426294, LOC105431177, LOC105428101, LOC105428055, LOC105433831	592	76	7798	2.42648	0.758053	0.0884994	0.0839404
KEGG_PATHWAY	pbar00590:Arachidonic acid metabolism	7	0.776915	0.00450759	LOC105426680, LOC105433948, LOC105428205, LOC105424575, LOC105424585, LOC105424574, LOC105427427	172	29	3061	4.29571	0.348963	0.0540911	0.0495835
GOTERM_CC_DIRECT	GO:0005930~axoneme	9	0.99889	0.00532111	LOC105432389, LOC105427969, LOC105422936, LOC105423361, LOC105429681, LOC105430315, LOC105427213, LOC105425645, LOC105429800	595	39	8362	3.24318	0.578663	0.0615729	0.0566318
GOTERM_MF_DIRECT	GO:0000981~DNA-binding transcription factor activity, RNA polymerase II-specific	42	4.66149	0.00602681	LOC105430909, LOC105424407, LOC105426649, LOC105431082, LOC105423235, LOC105424467, LOC105422442, LOC105427317, LOC105429557, LOC105433982, LOC105431041, LOC105434010, LOC105422580, LOC105432957, LOC105432952, LOC105430532, LOC105423745, LOC105422876, LOC105426937, LOC105426319, LOC105424838, LOC105422054, LOC105428434, LOC105425722, LOC105422332, LOC105422772, LOC105427207, LOC105425742, LOC1054…	592	363	7798	1.52407	0.863968	0.116991	0.110964
GOTERM_CC_DIRECT	GO:0062129~chitin-based extracellular matrix	7	0.776915	0.00846277	LOC105425319, LOC105428629, LOC105428628, LOC105432141, LOC105423420, LOC105427631, LOC105431258	595	26	8362	3.78371	0.747616	0.0907455	0.0834635
GOTERM_CC_DIRECT	GO:0000776~kinetochore	6	0.665927	0.00896252	LOC105434048, LOC105424151, LOC105424462, LOC105425232, LOC105426410, LOC105429437	595	19	8362	4.43804	0.767409	0.0907455	0.0834635
GOTERM_MF_DIRECT	GO:0016405~CoA-ligase activity	6	0.665927	0.00918408	LOC105422336, LOC105430593, LOC105422319, LOC105426786, LOC105423970, LOC105426767	592	18	7798	4.39077	0.952392	0.168375	0.159701
GOTERM_BP_DIRECT	GO:0046949~fatty-acyl-CoA biosynthetic process	6	0.665927	0.0105785	LOC105422336, LOC105430593, LOC105422319, LOC105426786, LOC105423970, LOC105426767	511	20	7288	4.27867	0.989109	0.203876	0.196182
KEGG_PATHWAY	pbar00100:Steroid biosynthesis	4	0.443951	0.0112085	LOC105427020, LOC105421966, LOC105427021, LOC105422892	172	9	3061	7.90956	0.657272	0.119557	0.109594
GOTERM_CC_DIRECT	GO:0005819~spindle	6	0.665927	0.0112662	LOC105422479, LOC105429365, LOC105424627, LOC105424151, LOC105424810, LOC105431214	595	20	8362	4.21613	0.840464	0.10736	0.098745
GOTERM_MF_DIRECT	GO:0008010~structural constituent of chitin-based larval cuticle	7	0.776915	0.0114813	LOC105425319, LOC105428629, LOC105428628, LOC105432141, LOC105423420, LOC105427631, LOC105431258	592	26	7798	3.54639	0.977868	0.189051	0.179312
GOTERM_MF_DIRECT	GO:0005506~iron ion binding	17	1.88679	0.0117158	LOC105424757, LOC105423309, LOC105428843, LOC105431083, LOC105428655, LOC105424055, LOC105426322, LOC105423652, LOC105434090, LOC105426293, LOC105428273, LOC105426294, LOC105432893, LOC105431177, LOC105428101, LOC105428055, LOC105433831	592	114	7798	1.96429	0.979535	0.189051	0.179312
GOTERM_MF_DIRECT	GO:0004301~epoxide hydrolase activity	4	0.443951	0.0120305	LOC112552700, LOC105426908, LOC105433948, LOC105428205	592	7	7798	7.52703	0.981577	0.189051	0.179312
KEGG_PATHWAY	pbar00130:Ubiquinone and other terpenoid-quinone biosynthesis	6	0.665927	0.0129465	LOC105422336, LOC105430593, LOC105422319, LOC105426786, LOC105423970, LOC105430215	172	26	3061	4.10689	0.710021	0.124286	0.113929
GOTERM_BP_DIRECT	GO:0001676~long-chain fatty acid metabolic process	6	0.665927	0.0131036	LOC105422336, LOC105430593, LOC105422319, LOC105426786, LOC105423970, LOC105426767	511	21	7288	4.07492	0.996324	0.241562	0.232446
GOTERM_BP_DIRECT	GO:0009097~isoleucine biosynthetic process	3	0.332963	0.0139824	LOC105428221, LOC105428154, LOC105428555	511	3	7288	14.2622	0.997482	0.247022	0.2377
GOTERM_BP_DIRECT	GO:0046512~sphingosine biosynthetic process	4	0.443951	0.0146268	LOC105433819, LOC105428276, LOC105428275, LOC105422665	511	8	7288	7.13112	0.998093	0.24807	0.238709
GOTERM_MF_DIRECT	GO:0003777~microtubule motor activity	6	0.665927	0.0146533	LOC105423943, LOC105433510, LOC105426266, LOC105426112, LOC105431226, LOC105426535	592	20	7798	3.95169	0.992337	0.215665	0.204555
GOTERM_MF_DIRECT	GO:0016491~oxidoreductase activity	15	1.66482	0.0153228	LOC105428843, LOC105429856, LOC105432391, LOC105427797, LOC105428632, LOC105429852, LOC105429855, LOC105433442, LOC105431089, LOC112553048, LOC105427793, LOC105432294, LOC105431217, LOC105431710, LOC105433438	592	98	7798	2.01617	0.993877	0.215665	0.204555
GOTERM_MF_DIRECT	GO:0004794~threonine deaminase activity	3	0.332963	0.0163382	LOC105428221, LOC105428154, LOC105428555	592	3	7798	13.1723	0.995644	0.215665	0.204555
GOTERM_MF_DIRECT	GO:0003941~L-serine ammonia-lyase activity	3	0.332963	0.0163382	LOC105428221, LOC105428154, LOC105428555	592	3	7798	13.1723	0.995644	0.215665	0.204555
GOTERM_BP_DIRECT	GO:0050906~detection of stimulus involved in sensory perception	4	0.443951	0.0208159	LOC105432565, LOC105426276, LOC105427373, LOC105427412	511	9	7288	6.33877	0.999869	0.339459	0.326649
GOTERM_CC_DIRECT	GO:0031982~vesicle	4	0.443951	0.0216792	LOC105426184, LOC105428185, LOC105434114, LOC105423677	595	9	8362	6.24613	0.971294	0.195113	0.179456
KEGG_PATHWAY	pbar04981:Folate transport and metabolism	5	0.554939	0.0225396	LOC105433455, LOC105430772, LOC105433013, LOC105430738, LOC105430820	172	20	3061	4.44913	0.885338	0.196709	0.180317
GOTERM_MF_DIRECT	GO:0004181~metallocarboxypeptidase activity	5	0.554939	0.022735	LOC105434215, LOC105424849, LOC105434254, LOC105434253, LOC105422849	592	15	7798	4.39077	0.999494	0.28856	0.273695
GOTERM_MF_DIRECT	GO:0004467~long-chain fatty acid-CoA ligase activity	6	0.665927	0.0263601	LOC105422336, LOC105430593, LOC105422319, LOC105426786, LOC105423970, LOC105426767	592	23	7798	3.43625	0.999852	0.322179	0.305582
GOTERM_BP_DIRECT	GO:0006565~L-serine catabolic process	3	0.332963	0.0266727	LOC105428221, LOC105428154, LOC105428555	511	4	7288	10.6967	0.99999	0.403901	0.388659
GOTERM_BP_DIRECT	GO:0051256~mitotic spindle midzone assembly	3	0.332963	0.0266727	LOC105427707, LOC105424627, LOC105424677	511	4	7288	10.6967	0.99999	0.403901	0.388659
GOTERM_CC_DIRECT	GO:0005777~peroxisome	10	1.10988	0.0272234	LOC105422336, LOC105430593, LOC105422319, LOC105432099, LOC105432096, LOC105428843, LOC105426786, LOC105423970, LOC105434327, LOC105432610	595	61	8362	2.3039	0.988568	0.232115	0.213489
GOTERM_BP_DIRECT	GO:0007094~mitotic spindle assembly checkpoint signaling	4	0.443951	0.0282191	LOC105433276, LOC105424151, LOC105424462, LOC105425232	511	10	7288	5.70489	0.999995	0.412582	0.397013
GOTERM_MF_DIRECT	GO:0030527~structural constituent of chromatin	6	0.665927	0.031287	LOC105424220, LOC105434150, LOC105433648, LOC105424224, LOC105424964, LOC105429525	592	24	7798	3.29307	0.999972	0.368739	0.349744
KEGG_PATHWAY	pbar01240:Biosynthesis of cofactors	13	1.44284	0.0316469	LOC105428632, LOC105423311, LOC105433455, LOC105431295, LOC105426460, LOC105424020, LOC105432716, LOC105433989, LOC105432757, LOC105431710, LOC105430215, LOC105432415, LOC105434008	172	119	3061	1.94416	0.95288	0.253175	0.232077
KEGG_PATHWAY	pbar00830:Retinol metabolism	5	0.554939	0.0361783	LOC105431295, LOC105424020, LOC105428632, LOC105431710, LOC105432415	172	23	3061	3.86881	0.969822	0.267163	0.244899
GOTERM_CC_DIRECT	GO:0005576~extracellular region	26	2.88568	0.0401566	LOC105422369, LOC105425438, LOC105423559, LOC105433819, LOC105427213, LOC105426861, LOC105425756, LOC105422665, LOC105427195, LOC105430131, LOC105425093, LOC105428286, LOC105431283, LOC105432557, LOC105427982, LOC105424255, LOC105427124, LOC105425965, LOC105431090, LOC105432486, LOC105427980, LOC105428276, LOC105429022, LOC105428275, LOC105430129, LOC105432589	595	244	8362	1.49753	0.998692	0.325269	0.299167
GOTERM_BP_DIRECT	GO:0044772~mitotic cell cycle phase transition	3	0.332963	0.0424131	LOC105428084, LOC105434013, LOC105429567	511	5	7288	8.55734	1	0.592478	0.570121
GOTERM_BP_DIRECT	GO:0000226~microtubule cytoskeleton organization	8	0.887902	0.043318	LOC105424627, LOC105424409, LOC105423361, LOC105431618, LOC105423583, LOC105424497, LOC105433857, LOC105425876	511	47	7288	2.42761	1	0.592478	0.570121
KEGG_PATHWAY	pbar00670:One carbon pool by folate	5	0.554939	0.0474193	LOC105433455, LOC105430772, LOC105433013, LOC105428463, LOC105422187	172	25	3061	3.5593	0.990099	0.325161	0.298064
KEGG_PATHWAY	pbar03266:Virion - Herpesvirus	3	0.332963	0.0541193	LOC105425760, LOC105425798, LOC105427238	172	7	3061	7.62708	0.994936	0.346363	0.3175
GOTERM_BP_DIRECT	GO:0007059~chromosome segregation	4	0.443951	0.0575465	LOC105432046, LOC105424151, LOC105428651, LOC105426998	511	13	7288	4.38838	1	0.762491	0.733717
GOTERM_CC_DIRECT	GO:0030496~midbody	4	0.443951	0.0597376	LOC105427707, LOC105434048, LOC105424462, LOC105424677	595	13	8362	4.32424	0.999954	0.460833	0.423852
GOTERM_BP_DIRECT	GO:0101030~tRNA-guanine transglycosylation	3	0.332963	0.0607161	LOC105425857, LOC105425849, LOC105425852	511	6	7288	7.13112	1	0.776167	0.746877
KEGG_PATHWAY	pbar04148:Efferocytosis	8	0.887902	0.0635472	LOC105427020, LOC105433830, LOC105421966, LOC105423281, LOC105427021, LOC105429820, LOC105425888, LOC105430103	172	64	3061	2.22456	0.998045	0.381283	0.349509
GOTERM_BP_DIRECT	GO:0016042~lipid catabolic process	7	0.776915	0.0636327	LOC105427020, LOC105434334, LOC105429025, LOC105425373, LOC105421966, LOC105427012, LOC105427021	511	41	7288	2.43502	1	0.776167	0.746877
GOTERM_BP_DIRECT	GO:0019367~fatty acid elongation, saturated fatty acid	4	0.443951	0.0695621	LOC105429762, LOC105431152, LOC105431153, LOC105431030	511	14	7288	4.07492	1	0.776167	0.746877
GOTERM_BP_DIRECT	GO:0008045~motor neuron axon guidance	4	0.443951	0.0695621	LOC105429068, LOC105432050, LOC105427653, LOC105426822	511	14	7288	4.07492	1	0.776167	0.746877
GOTERM_BP_DIRECT	GO:0034626~fatty acid elongation, polyunsaturated fatty acid	4	0.443951	0.0695621	LOC105429762, LOC105431152, LOC105431153, LOC105431030	511	14	7288	4.07492	1	0.776167	0.746877
GOTERM_BP_DIRECT	GO:0034625~fatty acid elongation, monounsaturated fatty acid	4	0.443951	0.0695621	LOC105429762, LOC105431152, LOC105431153, LOC105431030	511	14	7288	4.07492	1	0.776167	0.746877
KEGG_PATHWAY	pbar00430:Taurine and hypotaurine metabolism	3	0.332963	0.0695627	LOC105434257, LOC105422866, LOC105426680	172	8	3061	6.67369	0.99894	0.392825	0.360089
KEGG_PATHWAY	pbar00053:Ascorbate and aldarate metabolism	4	0.443951	0.0753562	LOC105432294, LOC105424020, LOC105422187, LOC105432415	172	18	3061	3.95478	0.999414	0.4019	0.368408
GOTERM_MF_DIRECT	GO:0009922~fatty acid elongase activity	4	0.443951	0.0842292	LOC105429762, LOC105431152, LOC105431153, LOC105431030	592	14	7798	3.76351	1	0.926521	0.878792
GOTERM_MF_DIRECT	GO:0015631~tubulin binding	4	0.443951	0.0842292	LOC105431618, LOC105423583, LOC105426036, LOC105431636	592	14	7798	3.76351	1	0.926521	0.878792
KEGG_PATHWAY	pbar00051:Fructose and mannose metabolism	4	0.443951	0.0859544	LOC105429045, LOC105428157, LOC105429044, LOC105433706	172	19	3061	3.74663	0.999804	0.434296	0.398105
GOTERM_CC_DIRECT	GO:0030425~dendrite	6	0.665927	0.0898596	LOC105432717, LOC105432716, LOC105428951, LOC105432757, LOC105433989, LOC105434008	595	34	8362	2.48008	1	0.661694	0.608595
GOTERM_MF_DIRECT	GO:0015276~ligand-gated monoatomic ion channel activity	5	0.554939	0.091618	LOC105432565, LOC105426276, LOC105427373, LOC105427412, LOC105425952	592	23	7798	2.86354	1	0.975288	0.925046
GOTERM_MF_DIRECT	GO:0000978~RNA polymerase II cis-regulatory region sequence-specific DNA binding	32	3.55161	0.0977709	LOC105430909, LOC105424407, LOC105423398, LOC105425178, LOC105423235, LOC105427317, LOC105429557, LOC105433982, LOC105434010, LOC105432957, LOC105432952, LOC105422876, LOC105426937, LOC105426319, LOC105424838, LOC105422054, LOC105425722, LOC105422332, LOC105427207, LOC105423588, LOC105431597, LOC105427783, LOC105433452, LOC105424293, LOC105433559, LOC105430247, LOC105430600, LOC105434009, LOC1054…	592	321	7798	1.31313	1	0.996028	0.944717
GOTERM_MF_DIRECT	GO:0016538~cyclin-dependent protein serine/threonine kinase regulator activity	4	0.443951	0.0996028	LOC105428084, LOC105434013, LOC105422292, LOC105429567	592	15	7798	3.51261	1	0.996028	0.944717

## Sheet: UP Functional Annotation Table
ID	Gene Name	Species	GOTERM_BP_DIRECT	GOTERM_CC_DIRECT	GOTERM_MF_DIRECT	KEGG_PATHWAY
LOC105424574	15-hydroxyprostaglandin dehydrogenase [NAD(+)]-like(LOC105424574)	Pogonomyrmex barbatus		GO:0005737~cytoplasm,	GO:0016616~oxidoreductase activity, acting on the CH-OH group of donors, NAD or NADP as acceptor,	pbar00590:Arachidonic acid metabolism,
LOC105424575	15-hydroxyprostaglandin dehydrogenase [NAD(+)]-like(LOC105424575)	Pogonomyrmex barbatus		GO:0005737~cytoplasm,	GO:0016616~oxidoreductase activity, acting on the CH-OH group of donors, NAD or NADP as acceptor,	pbar00590:Arachidonic acid metabolism,
LOC105424585	15-hydroxyprostaglandin dehydrogenase [NAD(+)]-like(LOC105424585)	Pogonomyrmex barbatus		GO:0005737~cytoplasm,	GO:0016616~oxidoreductase activity, acting on the CH-OH group of donors, NAD or NADP as acceptor,	pbar00590:Arachidonic acid metabolism,
LOC105429821	2-oxoglutarate dehydrogenase, mitochondrial-like(LOC105429821)	Pogonomyrmex barbatus	GO:0006099~tricarboxylic acid cycle,	GO:0005739~mitochondrion,GO:0045252~oxoglutarate dehydrogenase complex,	GO:0004591~oxoglutarate dehydrogenase (succinyl-transferring) activity,GO:0030976~thiamine pyrophosphate binding,
LOC105423970	4-coumarate--CoA ligase-like 7(LOC105423970)	Pogonomyrmex barbatus	GO:0001676~long-chain fatty acid metabolic process,GO:0046949~fatty-acyl-CoA biosynthetic process,	GO:0005777~peroxisome,	GO:0004467~long-chain fatty acid-CoA ligase activity,GO:0016405~CoA-ligase activity,	pbar00130:Ubiquinone and other terpenoid-quinone biosynthesis,pbar01100:Metabolic pathways,
LOC105426767	4-coumarate--CoA ligase-like 7(LOC105426767)	Pogonomyrmex barbatus	GO:0001676~long-chain fatty acid metabolic process,GO:0046949~fatty-acyl-CoA biosynthetic process,		GO:0004467~long-chain fatty acid-CoA ligase activity,GO:0016405~CoA-ligase activity,
LOC105424149	60 kDa SS-A/Ro ribonucleoprotein-like(LOC105424149)	Pogonomyrmex barbatus		GO:0005737~cytoplasm,GO:1990904~ribonucleoprotein complex,	GO:0003723~RNA binding,GO:0046872~metal ion binding,
LOC105424351	ATP-binding cassette sub-family A member 2-like(LOC105424351)	Pogonomyrmex barbatus	GO:0006869~lipid transport,GO:0055085~transmembrane transport,	GO:0016020~membrane,GO:0043231~intracellular membrane-bounded organelle,	GO:0005319~lipid transporter activity,GO:0005524~ATP binding,GO:0016887~ATP hydrolysis activity,GO:0140359~ABC-type transporter activity,	pbar02010:ABC transporters,
LOC105433764	ATP-dependent Clp protease ATP-binding subunit clpX-like, mitochondrial(LOC105433764)	Pogonomyrmex barbatus	GO:0006508~proteolysis,GO:0030163~protein catabolic process,GO:0051603~proteolysis involved in protein catabolic process,	GO:0005759~mitochondrial matrix,	GO:0005524~ATP binding,GO:0008233~peptidase activity,GO:0016887~ATP hydrolysis activity,
LOC105426460	Adenylate kinase 3(Ak3)	Pogonomyrmex barbatus	GO:0006139~nucleobase-containing compound metabolic process,GO:0006172~ADP biosynthetic process,GO:0046033~AMP metabolic process,GO:0046039~GTP metabolic process,GO:0046041~ITP metabolic process,	GO:0005737~cytoplasm,GO:0005739~mitochondrion,GO:0005759~mitochondrial matrix,	GO:0004017~adenylate kinase activity,GO:0005524~ATP binding,GO:0005525~GTP binding,GO:0046899~nucleoside triphosphate adenylate kinase activity,	pbar00230:Purine metabolism,pbar01232:Nucleotide metabolism,pbar01240:Biosynthesis of cofactors,
LOC105426558	Anion exchanger 2(Ae2)	Pogonomyrmex barbatus	GO:0006820~monoatomic anion transport,GO:0015701~bicarbonate transport,GO:0051453~regulation of intracellular pH,GO:0055085~transmembrane transport,	GO:0005886~plasma membrane,	GO:0005452~solute:inorganic anion antiporter activity,GO:0008509~monoatomic anion transmembrane transporter activity,
LOC105424284	BAG family molecular chaperone regulator 6-like(LOC105424284)	Pogonomyrmex barbatus			GO:0005515~protein binding,
LOC105422022	CD63 antigen(LOC105422022)	Pogonomyrmex barbatus		GO:0005886~plasma membrane,GO:0016020~membrane,		pbar03272:Virion - Hepatitis viruses,pbar04142:Lysosome,
LOC105425009	CHORD-like protein(mora)	Pogonomyrmex barbatus			GO:0046872~metal ion binding,
LOC105426331	CTD nuclear envelope phosphatase 1 regulatory subunit 2(Cnep1r2)	Pogonomyrmex barbatus	GO:0006629~lipid metabolic process,	GO:0005737~cytoplasm,GO:0031965~nuclear membrane,GO:0071595~Nem1-Spo7 phosphatase complex,
LOC105426017	Cell division cycle 6(Cdc6)	Pogonomyrmex barbatus	GO:0006270~DNA replication initiation,GO:0033314~mitotic DNA replication checkpoint signaling,GO:0051301~cell division,	GO:0005634~nucleus,	GO:0003688~DNA replication origin binding,GO:0016887~ATP hydrolysis activity,
LOC105426285	Centrosomal protein 89kDa(Cep89)	Pogonomyrmex barbatus	GO:0007005~mitochondrion organization,GO:0007268~chemical synaptic transmission,GO:0060271~cilium assembly,	GO:0005814~centriole,GO:0045202~synapse,GO:0097539~ciliary transition fiber,
LOC105422369	Chitin and LDLR binding deacetylase 3(ChLD3)	Pogonomyrmex barbatus	GO:0005975~carbohydrate metabolic process,	GO:0005576~extracellular region,	GO:0005515~protein binding,GO:0008061~chitin binding,GO:0016787~hydrolase activity,
LOC105431088	Chromosome associated protein G(Cap-G)	Pogonomyrmex barbatus	GO:0007076~mitotic chromosome condensation,GO:0051301~cell division,	GO:0000793~condensed chromosome,GO:0000796~condensin complex,GO:0005737~cytoplasm,	GO:0005515~protein binding,
LOC105422292	Cyclin-dependent kinase subunit 30A(Cks30A)	Pogonomyrmex barbatus	GO:0007346~regulation of mitotic cell cycle,GO:0051301~cell division,	GO:0000307~cyclin-dependent protein kinase holoenzyme complex,GO:0019005~SCF ubiquitin ligase complex,	GO:0016538~cyclin-dependent protein serine/threonine kinase regulator activity,GO:0019901~protein kinase binding,GO:0042393~histone binding,GO:0043130~ubiquitin binding,GO:0061575~cyclin-dependent protein serine/threonine kinase activator activity,
LOC105433831	Cytochrome P450 family protein sad(sad)	Pogonomyrmex barbatus			GO:0004497~monooxygenase activity,GO:0005506~iron ion binding,GO:0016705~oxidoreductase activity, acting on paired donors, with incorporation or reduction of molecular oxygen,GO:0020037~heme binding,	pbar00981:Insect hormone biosynthesis,
LOC105434255	DC-STAMP domain-containing protein 2-like(LOC105434255)	Pogonomyrmex barbatus		GO:0016020~membrane,
LOC105426006	DNA ligase 3(DNAlig3)	Pogonomyrmex barbatus	GO:0006273~lagging strand elongation,GO:0006302~double-strand break repair,GO:0006310~DNA recombination,GO:0043504~mitochondrial DNA repair,GO:0071897~DNA biosynthetic process,GO:0097681~double-strand break repair via alternative nonhomologous end joining,	GO:0070421~DNA ligase III-XRCC1 complex,	GO:0003910~DNA ligase (ATP) activity,GO:0005524~ATP binding,	pbar03410:Base excision repair,
LOC105423829	DNA polymerase alpha catalytic subunit-like(LOC105423829)	Pogonomyrmex barbatus	GO:0006272~leading strand elongation,GO:0006273~lagging strand elongation,GO:1902975~mitotic DNA replication initiation,	GO:0005658~alpha DNA polymerase:primase complex,	GO:0000166~nucleotide binding,GO:0003682~chromatin binding,GO:0003688~DNA replication origin binding,GO:0003697~single-stranded DNA binding,GO:0003887~DNA-directed DNA polymerase activity,GO:0017076~purine nucleotide binding,GO:0019103~pyrimidine nucleotide binding,
LOC105432036	DNA polymerase alpha subunit B(DNApol-alpha73)	Pogonomyrmex barbatus	GO:0006260~DNA replication,GO:0006270~DNA replication initiation,	GO:0005658~alpha DNA polymerase:primase complex,	GO:0003677~DNA binding,	pbar03030:DNA replication,
LOC105433787	DNA polymerase beta-like(LOC105433787)	Pogonomyrmex barbatus	GO:0006260~DNA replication,GO:0006284~base-excision repair,GO:0006303~double-strand break repair via nonhomologous end joining,	GO:0005634~nucleus,GO:0005737~cytoplasm,	GO:0003677~DNA binding,GO:0003887~DNA-directed DNA polymerase activity,GO:0016829~lyase activity,GO:0046872~metal ion binding,	pbar03410:Base excision repair,
LOC105431853	DNA polymerase theta(DNApol-theta)	Pogonomyrmex barbatus	GO:0006261~DNA-templated DNA replication,GO:0097681~double-strand break repair via alternative nonhomologous end joining,	GO:0042575~DNA polymerase complex,	GO:0003677~DNA binding,GO:0003887~DNA-directed DNA polymerase activity,GO:0005524~ATP binding,
LOC105423750	DNA replication complex GINS protein PSF3(Psf3)	Pogonomyrmex barbatus	GO:1902975~mitotic DNA replication initiation,	GO:0000811~GINS complex,
LOC105424321	DNA replication factor Cdt1-like(LOC105424321)	Pogonomyrmex barbatus	GO:0000076~DNA replication checkpoint signaling,GO:0000278~mitotic cell cycle,GO:0030174~regulation of DNA-templated DNA replication initiation,GO:0071163~DNA replication preinitiation complex assembly,	GO:0005634~nucleus,	GO:0003677~DNA binding,GO:0070182~DNA polymerase binding,
LOC105423745	DNA-binding protein D-ETS-6-like(LOC105423745)	Pogonomyrmex barbatus	GO:0006357~regulation of transcription by RNA polymerase II,GO:0030154~cell differentiation,	GO:0005634~nucleus,	GO:0000981~DNA-binding transcription factor activity, RNA polymerase II-specific,GO:0043565~sequence-specific DNA binding,
LOC105432951	DUF1676 domain-containing protein Osi10b(Osi10b)	Pogonomyrmex barbatus		GO:0016020~membrane,
LOC105427575	Deterin(Det)	Pogonomyrmex barbatus				pbar04215:Apoptosis - multiple species,
LOC105427969	Dynein heavy chain at 93AB(Dhc93AB)	Pogonomyrmex barbatus	GO:0007018~microtubule-based movement,	GO:0005874~microtubule,GO:0005930~axoneme,GO:0030286~dynein complex,GO:0031514~motile cilium,	GO:0005524~ATP binding,GO:0008569~minus-end-directed microtubule motor activity,GO:0016887~ATP hydrolysis activity,GO:0045505~dynein intermediate chain binding,GO:0051959~dynein light intermediate chain binding,	pbar04814:Motor proteins,
LOC105429259	E3 ubiquitin-protein ligase Hakai-like(Hakai)	Pogonomyrmex barbatus	GO:0016567~protein ubiquitination,GO:0030155~regulation of cell adhesion,GO:0060255~regulation of macromolecule metabolic process,	GO:0005634~nucleus,	GO:0046872~metal ion binding,GO:0061630~ubiquitin protein ligase activity,
LOC105429196	E3 ubiquitin-protein ligase MARCH1-like(LOC105429196)	Pogonomyrmex barbatus		GO:0016020~membrane,	GO:0008270~zinc ion binding,
LOC105429197	E3 ubiquitin-protein ligase MARCH3-like(LOC105429197)	Pogonomyrmex barbatus	GO:0016567~protein ubiquitination,	GO:0016020~membrane,	GO:0004842~ubiquitin-protein transferase activity,GO:0008270~zinc ion binding,
LOC105429198	E3 ubiquitin-protein ligase MARCH3-like(LOC105429198)	Pogonomyrmex barbatus		GO:0016020~membrane,	GO:0008270~zinc ion binding,
LOC105429199	E3 ubiquitin-protein ligase MARCH3-like(LOC105429199)	Pogonomyrmex barbatus	GO:0016567~protein ubiquitination,	GO:0016020~membrane,	GO:0004842~ubiquitin-protein transferase activity,GO:0008270~zinc ion binding,
LOC105422540	E3 ubiquitin-protein ligase RNF14-like(LOC105422540)	Pogonomyrmex barbatus	GO:0000209~protein polyubiquitination,GO:0006511~ubiquitin-dependent protein catabolic process,GO:0016567~protein ubiquitination,GO:0032436~positive regulation of proteasomal ubiquitin-dependent protein catabolic process,GO:0060255~regulation of macromolecule metabolic process,	GO:0000151~ubiquitin ligase complex,GO:0005634~nucleus,GO:0005737~cytoplasm,	GO:0004842~ubiquitin-protein transferase activity,GO:0008270~zinc ion binding,GO:0031624~ubiquitin conjugating enzyme binding,GO:0061630~ubiquitin protein ligase activity,
LOC105431344	E3 ubiquitin-protein ligase TRIM71(LOC105431344)	Pogonomyrmex barbatus	GO:0000209~protein polyubiquitination,GO:0043161~proteasome-mediated ubiquitin-dependent protein catabolic process,		GO:0005515~protein binding,GO:0061630~ubiquitin protein ligase activity,
LOC105425645	EF-hand domain-containing protein 1-like(LOC105425645)	Pogonomyrmex barbatus	GO:0000281~mitotic cytokinesis,GO:0007052~mitotic spindle organization,GO:0060285~cilium-dependent cell motility,	GO:0005930~axoneme,GO:0072686~mitotic spindle,	GO:0043014~alpha-tubulin binding,
LOC105430738	Early gene at 23(E23)	Pogonomyrmex barbatus		GO:0005886~plasma membrane,	GO:0005524~ATP binding,GO:0016887~ATP hydrolysis activity,GO:0140359~ABC-type transporter activity,	pbar02010:ABC transporters,pbar04981:Folate transport and metabolism,
LOC105430429	Ecdysone-inducible gene L2(ImpL2)	Pogonomyrmex barbatus		GO:0016020~membrane,GO:0043005~neuron projection,
LOC105430732	Eclosion hormone(Eh)	Pogonomyrmex barbatus	GO:0007218~neuropeptide signaling pathway,GO:0018990~ecdysis, chitin-based cuticle,		GO:0008255~ecdysis-triggering hormone activity,
LOC105431730	Epidermal stripes and patches(Esp)	Pogonomyrmex barbatus	GO:0055085~transmembrane transport,GO:0098661~inorganic anion transmembrane transport,	GO:0016020~membrane,	GO:0008509~monoatomic anion transmembrane transporter activity,GO:0015116~sulfate transmembrane transporter activity,
LOC105422794	Extracellularly regulated kinase 7(Erk7)	Pogonomyrmex barbatus	GO:0006468~protein phosphorylation,GO:0035556~intracellular signal transduction,	GO:0005634~nucleus,GO:0005737~cytoplasm,	GO:0004705~JUN kinase activity,GO:0004707~MAP kinase activity,GO:0005524~ATP binding,
LOC105426050	F-box only protein 39-like(LOC105426050)	Pogonomyrmex barbatus	GO:0031146~SCF-dependent proteasomal ubiquitin-dependent protein catabolic process,GO:0031398~positive regulation of protein ubiquitination,	GO:0019005~SCF ubiquitin ligase complex,	GO:0005515~protein binding,
LOC105430169	FERM domain-containing protein 8 Bili(Bili)	Pogonomyrmex barbatus	GO:0009887~animal organ morphogenesis,GO:0030182~neuron differentiation,GO:0090090~negative regulation of canonical Wnt signaling pathway,	GO:0005829~cytosol,GO:0005856~cytoskeleton,GO:0005886~plasma membrane,
LOC105429567	G2/mitotic-specific cyclin-B(LOC105429567)	Pogonomyrmex barbatus	GO:0000079~regulation of cyclin-dependent protein serine/threonine kinase activity,GO:0044772~mitotic cell cycle phase transition,GO:0051301~cell division,	GO:0000307~cyclin-dependent protein kinase holoenzyme complex,GO:0005634~nucleus,GO:0005737~cytoplasm,	GO:0016538~cyclin-dependent protein serine/threonine kinase regulator activity,	pbar04068:FoxO signaling pathway,
LOC105424293	GATA-binding factor 6-A-like(LOC105424293)	Pogonomyrmex barbatus	GO:0000122~negative regulation of transcription by RNA polymerase II,GO:0045165~cell fate commitment,GO:0045944~positive regulation of transcription by RNA polymerase II,	GO:0005634~nucleus,	GO:0000978~RNA polymerase II cis-regulatory region sequence-specific DNA binding,GO:0000981~DNA-binding transcription factor activity, RNA polymerase II-specific,GO:0008270~zinc ion binding,
LOC105432116	GTPase-activating protein CdGAPr(CdGAPr)	Pogonomyrmex barbatus	GO:0007264~small GTPase-mediated signal transduction,		GO:0005096~GTPase activator activity,GO:0005515~protein binding,GO:0035091~phosphatidylinositol binding,
LOC105433314	Germ cell nuclear acidic peptidase(Gcna)	Pogonomyrmex barbatus	GO:0006974~DNA damage response,	GO:0005634~nucleus,
LOC105425888	Glucose transporter 1(Glut1)	Pogonomyrmex barbatus	GO:0015749~monosaccharide transmembrane transport,	GO:0016020~membrane,	GO:0015149~hexose transmembrane transporter activity,	pbar04148:Efferocytosis,
LOC105430377	Glycogen binding subunit 76A(Gbs-76A)	Pogonomyrmex barbatus	GO:0005979~regulation of glycogen biosynthetic process,	GO:0000164~protein phosphatase type 1 complex,	GO:0008157~protein phosphatase 1 binding,GO:2001069~glycogen binding,
LOC105433788	HD domain-containing protein 2(LOC105433788)	Pogonomyrmex barbatus		GO:0005737~cytoplasm,	GO:0002953~5'-deoxynucleotidase activity,	pbar00230:Purine metabolism,pbar00240:Pyrimidine metabolism,pbar01100:Metabolic pathways,pbar01232:Nucleotide metabolism,
LOC105430532	HLH54F(HLH54F)	Pogonomyrmex barbatus	GO:0006357~regulation of transcription by RNA polymerase II,GO:0010557~positive regulation of macromolecule biosynthetic process,GO:0032502~developmental process,GO:0045165~cell fate commitment,GO:0072002~Malpighian tubule development,		GO:0000977~RNA polymerase II transcription regulatory region sequence-specific DNA binding,GO:0000981~DNA-binding transcription factor activity, RNA polymerase II-specific,GO:0046982~protein heterodimerization activity,GO:0046983~protein dimerization activity,
LOC105425093	Imaginal disc growth factor 4(Idgf4)	Pogonomyrmex barbatus	GO:0005975~carbohydrate metabolic process,GO:0006032~chitin catabolic process,	GO:0005576~extracellular region,	GO:0004568~chitinase activity,GO:0008061~chitin binding,	pbar00520:Amino sugar and nucleotide sugar metabolism,pbar01100:Metabolic pathways,
LOC105434048	Inner centromere protein(Incenp)	Pogonomyrmex barbatus	GO:0000281~mitotic cytokinesis,GO:0051257~meiotic spindle midzone assembly,GO:0051310~metaphase chromosome alignment,GO:0071902~positive regulation of protein serine/threonine kinase activity,	GO:0000776~kinetochore,GO:0005634~nucleus,GO:0005737~cytoplasm,GO:0030496~midbody,GO:0032133~chromosome passenger complex,GO:1990385~meiotic spindle midzone,	GO:0043539~protein serine/threonine kinase activator activity,
LOC105433263	Inositol-3-phosphate synthase(Inos)	Pogonomyrmex barbatus	GO:0006021~inositol biosynthetic process,GO:0008654~phospholipid biosynthetic process,	GO:0005737~cytoplasm,	GO:0004512~inositol-3-phosphate synthase activity,	pbar00562:Inositol phosphate metabolism,pbar01100:Metabolic pathways,
LOC105431597	Inverted repeat binding protein 18 kDa(Irbp18)	Pogonomyrmex barbatus	GO:0006351~DNA-templated transcription,GO:0006357~regulation of transcription by RNA polymerase II,	GO:0005634~nucleus,	GO:0000978~RNA polymerase II cis-regulatory region sequence-specific DNA binding,GO:0000981~DNA-binding transcription factor activity, RNA polymerase II-specific,
LOC105432565	Ionotropic receptor 76b(Ir76b)	Pogonomyrmex barbatus	GO:0050906~detection of stimulus involved in sensory perception,	GO:0005886~plasma membrane,GO:0016020~membrane,	GO:0004970~glutamate-gated receptor activity,GO:0015276~ligand-gated monoatomic ion channel activity,
LOC105425952	Ionotropic receptor 8a(Ir8a)	Pogonomyrmex barbatus	GO:0006811~monoatomic ion transport,GO:0035249~synaptic transmission, glutamatergic,GO:0050804~modulation of chemical synaptic transmission,	GO:0005886~plasma membrane,GO:0045211~postsynaptic membrane,	GO:0004970~glutamate-gated receptor activity,GO:0015276~ligand-gated monoatomic ion channel activity,GO:0038023~signaling receptor activity,GO:1904315~transmitter-gated monoatomic ion channel activity involved in regulation of postsynaptic membrane potential,
LOC105423214	Juvenile hormone binding protein 2(Jhbp2)	Pogonomyrmex barbatus		GO:0005615~extracellular space,
LOC105425623	KIF1-binding protein homolog(LOC105425623)	Pogonomyrmex barbatus		GO:0005737~cytoplasm,GO:0005856~cytoskeleton,
LOC105426112	Kinesin family member 19A(Kif19A)	Pogonomyrmex barbatus	GO:0007018~microtubule-based movement,	GO:0005737~cytoplasm,GO:0005874~microtubule,	GO:0003777~microtubule motor activity,GO:0005524~ATP binding,GO:0008017~microtubule binding,	pbar04814:Motor proteins,
LOC105429527	Kinesin-like protein at 61F(Klp61F)	Pogonomyrmex barbatus	GO:0007018~microtubule-based movement,GO:0051231~spindle elongation,GO:0051301~cell division,GO:0090307~mitotic spindle assembly,	GO:0005634~nucleus,GO:0005876~spindle microtubule,GO:0072686~mitotic spindle,	GO:0005524~ATP binding,GO:0008017~microtubule binding,GO:0008574~plus-end-directed microtubule motor activity,	pbar04814:Motor proteins,
LOC105426535	Kinesin-like protein at 67A(Klp67A)	Pogonomyrmex barbatus	GO:0007018~microtubule-based movement,	GO:0005737~cytoplasm,GO:0005874~microtubule,	GO:0003777~microtubule motor activity,GO:0005524~ATP binding,GO:0008017~microtubule binding,	pbar04814:Motor proteins,
LOC105425079	Kv channel-interacting protein 4(LOC105425079)	Pogonomyrmex barbatus			GO:0005509~calcium ion binding,
LOC105427982	L-dopachrome tautomerase yellow-g(yellow-g)	Pogonomyrmex barbatus		GO:0005576~extracellular region,
LOC105429022	L-dopachrome tautomerase yellow-g2(yellow-g2)	Pogonomyrmex barbatus		GO:0005576~extracellular region,
LOC105428154	L-threonine dehydratase catabolic TdcB-like(LOC105428154)	Pogonomyrmex barbatus	GO:0006565~L-serine catabolic process,GO:0006567~threonine catabolic process,GO:0009097~isoleucine biosynthetic process,		GO:0003941~L-serine ammonia-lyase activity,GO:0004794~threonine deaminase activity,
LOC105432044	L-threonine dehydrogenase(Tdh)	Pogonomyrmex barbatus	GO:0006567~threonine catabolic process,		GO:0008743~L-threonine 3-dehydrogenase activity,	pbar00260:Glycine, serine and threonine metabolism,pbar01100:Metabolic pathways,
LOC105425742	LIM/homeobox protein Awh-like(LOC105425742)	Pogonomyrmex barbatus	GO:0006357~regulation of transcription by RNA polymerase II,GO:0030182~neuron differentiation,	GO:0005634~nucleus,	GO:0000977~RNA polymerase II transcription regulatory region sequence-specific DNA binding,GO:0000981~DNA-binding transcription factor activity, RNA polymerase II-specific,GO:0046872~metal ion binding,
LOC105424097	LIM1_Isl and LIM2_Isl domain-containing protein tup(tup)	Pogonomyrmex barbatus	GO:0007409~axonogenesis,GO:0045944~positive regulation of transcription by RNA polymerase II,GO:0048665~neuron fate specification,	GO:0005634~nucleus,	GO:0000981~DNA-binding transcription factor activity, RNA polymerase II-specific,GO:0000987~cis-regulatory region sequence-specific DNA binding,GO:0003677~DNA binding,GO:0046872~metal ion binding,
LOC105427038	LON peptidase N-terminal domain and RING finger protein 3(LOC105427038)	Pogonomyrmex barbatus	GO:0060255~regulation of macromolecule metabolic process,	GO:0005634~nucleus,GO:0005737~cytoplasm,	GO:0005515~protein binding,GO:0046872~metal ion binding,GO:0061630~ubiquitin protein ligase activity,
LOC105431178	Leucine-rich repeat 47(Lrr47)	Pogonomyrmex barbatus		GO:0005737~cytoplasm,	GO:0005515~protein binding,
LOC105424467	Lim3 homeobox protein(Lim3)	Pogonomyrmex barbatus	GO:0006357~regulation of transcription by RNA polymerase II,GO:0030182~neuron differentiation,	GO:0005634~nucleus,	GO:0000977~RNA polymerase II transcription regulatory region sequence-specific DNA binding,GO:0000981~DNA-binding transcription factor activity, RNA polymerase II-specific,GO:0008270~zinc ion binding,
LOC105422529	MAM and LDL-receptor class A domain-containing protein 1-like(LOC105422529)	Pogonomyrmex barbatus		GO:0016020~membrane,
LOC105425876	MAP/microtubule affinity-regulating kinase 3-like(LOC105425876)	Pogonomyrmex barbatus	GO:0000226~microtubule cytoskeleton organization,GO:0006468~protein phosphorylation,GO:0035556~intracellular signal transduction,	GO:0005737~cytoplasm,	GO:0004674~protein serine/threonine kinase activity,GO:0005524~ATP binding,GO:0050321~tau-protein kinase activity,
LOC105432046	MATH and LRR domain-containing protein PFE0570w-like(LOC105432046)	Pogonomyrmex barbatus	GO:0007052~mitotic spindle organization,GO:0007059~chromosome segregation,GO:0007346~regulation of mitotic cell cycle,GO:0023052~signaling,GO:0051382~kinetochore assembly,GO:0051642~centrosome localization,	GO:0005634~nucleus,GO:0005737~cytoplasm,GO:0031616~spindle pole centrosome,	GO:0008017~microtubule binding,
LOC105433544	MATH and LRR domain-containing protein PFE0570w-like(LOC105433544)	Pogonomyrmex barbatus		GO:0005615~extracellular space,GO:0031012~extracellular matrix,
LOC105431818	Meis homeobox homothorax(hth)	Pogonomyrmex barbatus		GO:0005634~nucleus,	GO:0003677~DNA binding,
LOC105424151	Monopolar spindle 1(Mps1)	Pogonomyrmex barbatus	GO:0007059~chromosome segregation,GO:0007094~mitotic spindle assembly checkpoint signaling,GO:0018105~peptidyl-serine phosphorylation,GO:0033316~meiotic spindle assembly checkpoint signaling,GO:0034501~protein localization to kinetochore,	GO:0000776~kinetochore,GO:0005634~nucleus,GO:0005819~spindle,	GO:0004674~protein serine/threonine kinase activity,GO:0004712~protein serine/threonine/tyrosine kinase activity,GO:0005524~ATP binding,
LOC105430909	Myc(Myc)	Pogonomyrmex barbatus	GO:0006357~regulation of transcription by RNA polymerase II,		GO:0000978~RNA polymerase II cis-regulatory region sequence-specific DNA binding,GO:0000981~DNA-binding transcription factor activity, RNA polymerase II-specific,GO:0003677~DNA binding,GO:0003700~DNA-binding transcription factor activity,GO:0046983~protein dimerization activity,
LOC105434114	Myosin 61F(Myo61F)	Pogonomyrmex barbatus	GO:0006897~endocytosis,GO:0007015~actin filament organization,GO:0030048~actin filament-based movement,GO:0030050~vesicle transport along actin filament,	GO:0005737~cytoplasm,GO:0005886~plasma membrane,GO:0005902~microvillus,GO:0015629~actin cytoskeleton,GO:0016459~myosin complex,GO:0031982~vesicle,	GO:0000146~microfilament motor activity,GO:0005524~ATP binding,GO:0051015~actin filament binding,	pbar04814:Motor proteins,
LOC105426645	N-acetylglucosamine-6-sulfatase-like(LOC105426645)	Pogonomyrmex barbatus	GO:0030203~glycosaminoglycan metabolic process,		GO:0005539~glycosaminoglycan binding,GO:0008449~N-acetylglucosamine-6-sulfatase activity,	pbar00531:Glycosaminoglycan degradation,pbar01100:Metabolic pathways,pbar04142:Lysosome,
LOC105427095	NACHT and WD repeat domain-containing protein 2(LOC105427095)	Pogonomyrmex barbatus			GO:0005515~protein binding,
LOC105434261	NF-kappa-B inhibitor cactus-like(LOC105434261)	Pogonomyrmex barbatus	GO:0071356~cellular response to tumor necrosis factor,	GO:0005829~cytosol,	GO:0005515~protein binding,GO:0051059~NF-kappaB binding,	pbar04620:Toll-like receptor signaling pathway,pbar04624:Toll and Imd signaling pathway,
LOC105433782	NGFI-A-binding protein homolog(nab)	Pogonomyrmex barbatus	GO:0045892~negative regulation of DNA-templated transcription,	GO:0005634~nucleus,	GO:0003712~transcription coregulator activity,GO:0008134~transcription factor binding,
LOC105431090	NPC intracellular cholesterol transporter 2-like(LOC105431090)	Pogonomyrmex barbatus	GO:0032367~intracellular cholesterol transport,	GO:0005576~extracellular region,	GO:0032934~sterol binding,	pbar04142:Lysosome,
LOC105428236	Ndc80(Ndc80)	Pogonomyrmex barbatus	GO:0051301~cell division,GO:0051315~attachment of mitotic spindle microtubules to kinetochore,	GO:0005634~nucleus,GO:0031262~Ndc80 complex,
LOC105422181	Nitrogen permease regulator-like 2(Nprl2)	Pogonomyrmex barbatus	GO:0010508~positive regulation of autophagy,GO:0034198~cellular response to amino acid starvation,GO:1904262~negative regulation of TORC1 signaling,	GO:0005774~vacuolar membrane,GO:1990130~GATOR1 complex,	GO:0005096~GTPase activator activity,	pbar04150:mTOR signaling pathway,
LOC105427207	POU domain protein 2-like(LOC105427207)	Pogonomyrmex barbatus	GO:0006357~regulation of transcription by RNA polymerase II,GO:0045944~positive regulation of transcription by RNA polymerase II,GO:0048468~cell development,GO:0048699~generation of neurons,	GO:0005634~nucleus,	GO:0000978~RNA polymerase II cis-regulatory region sequence-specific DNA binding,GO:0000981~DNA-binding transcription factor activity, RNA polymerase II-specific,
LOC105423358	PQ-loop repeat-containing protein 1(LOC105423358)	Pogonomyrmex barbatus	GO:0042147~retrograde transport, endosome to Golgi,GO:0045332~phospholipid translocation,	GO:0005768~endosome,GO:0005802~trans-Golgi network,GO:0005829~cytosol,GO:0016020~membrane,
LOC105432821	Protein Osi13(Osi13)	Pogonomyrmex barbatus		GO:0016020~membrane,
LOC105426502	RAS oncogene family member Rab23(Rab23)	Pogonomyrmex barbatus			GO:0003924~GTPase activity,GO:0005525~GTP binding,
LOC105428830	RAS oncogene family member Rab32(Rab32)	Pogonomyrmex barbatus	GO:0008333~endosome to lysosome transport,GO:0090385~phagosome-lysosome fusion,	GO:0005764~lysosome,GO:0005770~late endosome,GO:0005794~Golgi apparatus,GO:0005802~trans-Golgi network,GO:0016020~membrane,GO:0045335~phagocytic vesicle,	GO:0003924~GTPase activity,GO:0005525~GTP binding,
LOC105426316	RAS oncogene family member RabX4(RabX4)	Pogonomyrmex barbatus			GO:0003924~GTPase activity,GO:0005525~GTP binding,
LOC105429381	RNA polymerase II-associated protein 1-like(LOC105429381)	Pogonomyrmex barbatus	GO:0006366~transcription by RNA polymerase II,	GO:0005634~nucleus,
LOC105434274	RNA pseudouridylate synthase domain-containing protein 1-like(LOC105434274)	Pogonomyrmex barbatus	GO:0000455~enzyme-directed rRNA pseudouridine synthesis,GO:0001522~pseudouridine synthesis,		GO:0003723~RNA binding,GO:0009982~pseudouridine synthase activity,
LOC105434282	RNA-binding protein MEX3B(LOC105434282)	Pogonomyrmex barbatus	GO:0010468~regulation of gene expression,		GO:0003723~RNA binding,
LOC105427707	Rac GTPase activating protein tumbleweed(tum)	Pogonomyrmex barbatus	GO:0000281~mitotic cytokinesis,GO:0007165~signal transduction,GO:0007266~Rho protein signal transduction,GO:0051256~mitotic spindle midzone assembly,	GO:0005634~nucleus,GO:0030496~midbody,GO:0032154~cleavage furrow,GO:0051233~spindle midzone,GO:0097149~centralspindlin complex,	GO:0005096~GTPase activator activity,GO:0046872~metal ion binding,
LOC105431089	SDR family oxidoreductase shroud(sro)	Pogonomyrmex barbatus	GO:0008202~steroid metabolic process,	GO:0016020~membrane,GO:0043231~intracellular membrane-bounded organelle,	GO:0016491~oxidoreductase activity,
LOC105425536	SEC14-like protein 2(LOC105425536)	Pogonomyrmex barbatus		GO:0005737~cytoplasm,
LOC105426092	SEC14-like protein 4(LOC105426092)	Pogonomyrmex barbatus		GO:0005737~cytoplasm,
LOC105430202	SET and MYND domain-containing protein 4-like(LOC105430202)	Pogonomyrmex barbatus	GO:0032259~methylation,	GO:0005634~nucleus,GO:0005737~cytoplasm,GO:0016020~membrane,	GO:0005515~protein binding,GO:0008168~methyltransferase activity,GO:0042826~histone deacetylase binding,GO:0046872~metal ion binding,
LOC105427344	Sak kinase(SAK)	Pogonomyrmex barbatus	GO:0006468~protein phosphorylation,	GO:0005634~nucleus,GO:0005737~cytoplasm,GO:0005814~centriole,	GO:0004672~protein kinase activity,GO:0004674~protein serine/threonine kinase activity,GO:0005515~protein binding,GO:0005524~ATP binding,	pbar04068:FoxO signaling pathway,
LOC105422387	Sarcoplasmic calcium-binding protein 1(Scp1)	Pogonomyrmex barbatus			GO:0005509~calcium ion binding,
LOC105426410	Serine/threonine-protein kinase polo(polo)	Pogonomyrmex barbatus	GO:0000278~mitotic cell cycle,GO:0006468~protein phosphorylation,GO:0007052~mitotic spindle organization,GO:0032465~regulation of cytokinesis,	GO:0000776~kinetochore,GO:0000922~spindle pole,GO:0005634~nucleus,GO:0005737~cytoplasm,GO:0005813~centrosome,	GO:0004674~protein serine/threonine kinase activity,GO:0005515~protein binding,GO:0005524~ATP binding,	pbar04068:FoxO signaling pathway,
LOC105433601	Spitting Image(Spt)	Pogonomyrmex barbatus	GO:0007349~cellularization,GO:0016477~cell migration,GO:0098609~cell-cell adhesion,	GO:0005737~cytoplasm,GO:0005912~adherens junction,GO:0016020~membrane,GO:0016342~catenin complex,	GO:0008013~beta-catenin binding,GO:0051015~actin filament binding,
LOC105430194	Swt1 RNA endoribonuclease(Swt1)	Pogonomyrmex barbatus		GO:0005634~nucleus,
LOC105425431	Synaptotagmin 14(Syt14)	Pogonomyrmex barbatus		GO:0016020~membrane,	GO:0005543~phospholipid binding,
LOC105433452	T-box protein 2-like(LOC105433452)	Pogonomyrmex barbatus	GO:0001708~cell fate specification,GO:0006357~regulation of transcription by RNA polymerase II,GO:0045893~positive regulation of DNA-templated transcription,	GO:0000785~chromatin,GO:0005634~nucleus,	GO:0000978~RNA polymerase II cis-regulatory region sequence-specific DNA binding,GO:0000981~DNA-binding transcription factor activity, RNA polymerase II-specific,
LOC105426885	TM2 and DnaJ domain-containing protein wurst(wus)	Pogonomyrmex barbatus	GO:0006897~endocytosis,	GO:0005769~early endosome,GO:0005886~plasma membrane,GO:0016020~membrane,
LOC105426072	TWIK-related acid-sensitive K[+] channel 6(Task6)	Pogonomyrmex barbatus	GO:0030322~stabilization of membrane potential,GO:0071805~potassium ion transmembrane transport,	GO:0005886~plasma membrane,GO:0016020~membrane,	GO:0015271~outward rectifier potassium channel activity,GO:0022841~potassium ion leak channel activity,
LOC105432281	Tetraspanin 26A(Tsp26A)	Pogonomyrmex barbatus	GO:0051604~protein maturation,GO:0072659~protein localization to plasma membrane,	GO:0005886~plasma membrane,GO:0016020~membrane,
LOC105433013	Thymidylate synthase(Ts)	Pogonomyrmex barbatus	GO:0006231~dTMP biosynthetic process,GO:0006235~dTTP biosynthetic process,GO:0032259~methylation,	GO:0005739~mitochondrion,GO:0005829~cytosol,	GO:0004799~thymidylate synthase activity,	pbar00240:Pyrimidine metabolism,pbar00670:One carbon pool by folate,pbar01100:Metabolic pathways,pbar01232:Nucleotide metabolism,pbar04981:Folate transport and metabolism,
LOC105429858	Tryptophanyl-tRNA synthetase, mitochondrial(TrpRS-m)	Pogonomyrmex barbatus	GO:0070183~mitochondrial tryptophanyl-tRNA aminoacylation,	GO:0005739~mitochondrion,GO:0005759~mitochondrial matrix,	GO:0004830~tryptophan-tRNA ligase activity,GO:0005515~protein binding,GO:0005524~ATP binding,
LOC105432415	UDP-glucuronosyltransferase 2B1-like(LOC105432415)	Pogonomyrmex barbatus		GO:0016020~membrane,	GO:0008194~UDP-glycosyltransferase activity,	pbar00040:Pentose and glucuronate interconversions,pbar00053:Ascorbate and aldarate metabolism,pbar00830:Retinol metabolism,pbar00860:Porphyrin metabolism,pbar00980:Metabolism of xenobiotics by cytochrome P450,pbar00982:Drug metabolism - cytochrome P450,pbar00983:Drug metabolism - other enzymes,pbar01100:Metabolic pathways,pbar01240:Biosynthesis of cofactors,
LOC105424020	UDP-glycosyltransferase family 50 member B3(Ugt50B3)	Pogonomyrmex barbatus		GO:0016020~membrane,	GO:0008194~UDP-glycosyltransferase activity,	pbar00040:Pentose and glucuronate interconversions,pbar00053:Ascorbate and aldarate metabolism,pbar00830:Retinol metabolism,pbar00860:Porphyrin metabolism,pbar00980:Metabolism of xenobiotics by cytochrome P450,pbar00982:Drug metabolism - cytochrome P450,pbar00983:Drug metabolism - other enzymes,pbar01100:Metabolic pathways,pbar01240:Biosynthesis of cofactors,
LOC112552999	WD repeat-containing protein 78(LOC112552999)	Pogonomyrmex barbatus	GO:0003341~cilium movement,	GO:0005858~axonemal dynein complex,GO:0031514~motile cilium,GO:0120293~dynein axonemal particle,	GO:0045503~dynein light chain binding,GO:0045504~dynein heavy chain binding,
LOC105424729	XPG-like endonuclease(Gen)	Pogonomyrmex barbatus		GO:0005634~nucleus,GO:0016020~membrane,	GO:0000400~four-way junction DNA binding,GO:0017108~5'-flap endonuclease activity,
LOC105434077	abnormal spindle-like microcephaly-associated protein homolog(LOC105434077)	Pogonomyrmex barbatus	GO:0000278~mitotic cell cycle,GO:0007051~spindle organization,GO:0051295~establishment of meiotic spindle localization,GO:0051301~cell division,	GO:0000922~spindle pole,GO:0005634~nucleus,GO:0005737~cytoplasm,	GO:0005515~protein binding,GO:0005516~calmodulin binding,
LOC105423695	actin, muscle(LOC105423695)	Pogonomyrmex barbatus	GO:0000281~mitotic cytokinesis,	GO:0005856~cytoskeleton,		pbar03082:ATP-dependent chromatin remodeling,pbar04145:Phagosome,pbar04391:Hippo signaling pathway - fly,pbar04745:Phototransduction - fly,pbar04814:Motor proteins,pbar04820:Cytoskeleton in muscle cells,pbar05100:Bacterial invasion of epithelial cells,
LOC105432010	adenylate kinase 7-like(LOC105432010)	Pogonomyrmex barbatus			GO:0016301~kinase activity,
LOC105425870	afadin- and alpha-actinin-binding protein-like(LOC105425870)	Pogonomyrmex barbatus	GO:0007155~cell adhesion,GO:0035735~intraciliary transport involved in cilium assembly,	GO:0005737~cytoplasm,GO:0034451~centriolar satellite,GO:0036064~ciliary basal body,GO:0070161~anchoring junction,
LOC105422126	alanine/arginine aminopeptidase-like(LOC105422126)	Pogonomyrmex barbatus	GO:0006508~proteolysis,GO:0043171~peptide catabolic process,	GO:0005615~extracellular space,GO:0005737~cytoplasm,GO:0016020~membrane,	GO:0008270~zinc ion binding,GO:0042277~peptide binding,GO:0070006~metalloaminopeptidase activity,
LOC105427775	alanine/arginine aminopeptidase-like(LOC105427775)	Pogonomyrmex barbatus	GO:0006508~proteolysis,GO:0043171~peptide catabolic process,	GO:0005615~extracellular space,GO:0005737~cytoplasm,GO:0016020~membrane,	GO:0008270~zinc ion binding,GO:0042277~peptide binding,GO:0070006~metalloaminopeptidase activity,	pbar00480:Glutathione metabolism,pbar01100:Metabolic pathways,
LOC105430961	alaserpin-like(LOC105430961)	Pogonomyrmex barbatus		GO:0005615~extracellular space,	GO:0004867~serine-type endopeptidase inhibitor activity,
LOC105422187	aldehyde dehydrogenase 7 family member A1(Aldh7A1)	Pogonomyrmex barbatus			GO:0004029~aldehyde dehydrogenase (NAD+) activity,	pbar00010:Glycolysis / Gluconeogenesis,pbar00053:Ascorbate and aldarate metabolism,pbar00071:Fatty acid degradation,pbar00260:Glycine, serine and threonine metabolism,pbar00280:Valine, leucine and isoleucine degradation,pbar00310:Lysine degradation,pbar00330:Arginine and proline metabolism,pbar00340:Histidine metabolism,pbar00380:Tryptophan metabolism,pbar00410:beta-Alanine metabolism,pbar00561:G…
LOC105423311	alkaline phosphatase-like(LOC105423311)	Pogonomyrmex barbatus	GO:0016311~dephosphorylation,	GO:0016020~membrane,	GO:0004035~alkaline phosphatase activity,GO:0046872~metal ion binding,	pbar00730:Thiamine metabolism,pbar00790:Folate biosynthesis,pbar01100:Metabolic pathways,pbar01240:Biosynthesis of cofactors,
LOC105431533	alpha-glucosidase-like(LOC105431533)	Pogonomyrmex barbatus	GO:0005975~carbohydrate metabolic process,			pbar00052:Galactose metabolism,pbar00500:Starch and sucrose metabolism,pbar01100:Metabolic pathways,
LOC105424267	alpha-tocopherol transfer protein-like(LOC105424267)	Pogonomyrmex barbatus		GO:0016020~membrane,	GO:1902936~phosphatidylinositol bisphosphate binding,
LOC112552919	aminopeptidase 1-like(LOC112552919)	Pogonomyrmex barbatus	GO:0006508~proteolysis,GO:0043171~peptide catabolic process,	GO:0005615~extracellular space,GO:0005737~cytoplasm,GO:0016020~membrane,	GO:0008270~zinc ion binding,GO:0042277~peptide binding,GO:0070006~metalloaminopeptidase activity,
LOC112552272	aminopeptidase 2, mitochondrial-like(LOC112552272)	Pogonomyrmex barbatus			GO:0004177~aminopeptidase activity,GO:0008237~metallopeptidase activity,GO:0008270~zinc ion binding,
LOC105430723	aminopeptidase M1-A-like(LOC105430723)	Pogonomyrmex barbatus	GO:0006508~proteolysis,GO:0043171~peptide catabolic process,	GO:0005615~extracellular space,GO:0005737~cytoplasm,GO:0005886~plasma membrane,GO:0098552~side of membrane,	GO:0008270~zinc ion binding,GO:0042277~peptide binding,GO:0070006~metalloaminopeptidase activity,
LOC105422459	aminopeptidase M1-B-like(LOC105422459)	Pogonomyrmex barbatus	GO:0006508~proteolysis,GO:0043171~peptide catabolic process,	GO:0005615~extracellular space,GO:0005737~cytoplasm,GO:0005886~plasma membrane,GO:0098552~side of membrane,	GO:0008270~zinc ion binding,GO:0042277~peptide binding,GO:0070006~metalloaminopeptidase activity,
LOC105423208	aminopeptidase M1-B-like(LOC105423208)	Pogonomyrmex barbatus	GO:0006508~proteolysis,GO:0043171~peptide catabolic process,	GO:0005615~extracellular space,GO:0005737~cytoplasm,GO:0005886~plasma membrane,GO:0098552~side of membrane,	GO:0008270~zinc ion binding,GO:0042277~peptide binding,GO:0070006~metalloaminopeptidase activity,
LOC105432117	aminopeptidase M1-C-like(LOC105432117)	Pogonomyrmex barbatus	GO:0006508~proteolysis,GO:0043171~peptide catabolic process,	GO:0005615~extracellular space,GO:0005737~cytoplasm,GO:0016020~membrane,	GO:0008270~zinc ion binding,GO:0042277~peptide binding,GO:0070006~metalloaminopeptidase activity,
LOC105422282	aminopeptidase M1-like(LOC105422282)	Pogonomyrmex barbatus	GO:0006508~proteolysis,GO:0043171~peptide catabolic process,	GO:0005615~extracellular space,GO:0005737~cytoplasm,GO:0016020~membrane,	GO:0008270~zinc ion binding,GO:0042277~peptide binding,GO:0070006~metalloaminopeptidase activity,
LOC105422569	aminopeptidase M1-like(LOC105422569)	Pogonomyrmex barbatus	GO:0006508~proteolysis,GO:0043171~peptide catabolic process,	GO:0005615~extracellular space,GO:0005737~cytoplasm,GO:0005886~plasma membrane,GO:0098552~side of membrane,	GO:0008270~zinc ion binding,GO:0042277~peptide binding,GO:0070006~metalloaminopeptidase activity,
LOC105422614	aminopeptidase M1-like(LOC105422614)	Pogonomyrmex barbatus		GO:0016020~membrane,	GO:0004177~aminopeptidase activity,GO:0008237~metallopeptidase activity,GO:0008270~zinc ion binding,
LOC105423067	aminopeptidase M1-like(LOC105423067)	Pogonomyrmex barbatus			GO:0004177~aminopeptidase activity,GO:0008237~metallopeptidase activity,GO:0008270~zinc ion binding,
LOC105426610	aminopeptidase M1-like(LOC105426610)	Pogonomyrmex barbatus	GO:0006508~proteolysis,GO:0043171~peptide catabolic process,	GO:0005615~extracellular space,GO:0005737~cytoplasm,GO:0016020~membrane,	GO:0008270~zinc ion binding,GO:0042277~peptide binding,GO:0070006~metalloaminopeptidase activity,
LOC105422260	aminopeptidase N-like(LOC105422260)	Pogonomyrmex barbatus	GO:0006508~proteolysis,GO:0043171~peptide catabolic process,	GO:0005615~extracellular space,GO:0005737~cytoplasm,GO:0016020~membrane,	GO:0008270~zinc ion binding,GO:0042277~peptide binding,GO:0070006~metalloaminopeptidase activity,
LOC105422723	aminopeptidase N-like(LOC105422723)	Pogonomyrmex barbatus	GO:0006508~proteolysis,GO:0043171~peptide catabolic process,	GO:0005615~extracellular space,GO:0005737~cytoplasm,GO:0016020~membrane,	GO:0008270~zinc ion binding,GO:0042277~peptide binding,GO:0070006~metalloaminopeptidase activity,
LOC105422926	aminopeptidase N-like(LOC105422926)	Pogonomyrmex barbatus	GO:0006508~proteolysis,GO:0043171~peptide catabolic process,	GO:0005615~extracellular space,GO:0005737~cytoplasm,GO:0005886~plasma membrane,GO:0098552~side of membrane,	GO:0008270~zinc ion binding,GO:0042277~peptide binding,GO:0070006~metalloaminopeptidase activity,	pbar00480:Glutathione metabolism,pbar01100:Metabolic pathways,
LOC105422927	aminopeptidase N-like(LOC105422927)	Pogonomyrmex barbatus	GO:0006508~proteolysis,GO:0043171~peptide catabolic process,	GO:0005615~extracellular space,GO:0005737~cytoplasm,GO:0005886~plasma membrane,GO:0098552~side of membrane,	GO:0004177~aminopeptidase activity,GO:0008237~metallopeptidase activity,GO:0008270~zinc ion binding,GO:0042277~peptide binding,GO:0070006~metalloaminopeptidase activity,	pbar00480:Glutathione metabolism,pbar01100:Metabolic pathways,
LOC105423408	aminopeptidase N-like(LOC105423408)	Pogonomyrmex barbatus	GO:0006508~proteolysis,GO:0043171~peptide catabolic process,	GO:0005615~extracellular space,GO:0005737~cytoplasm,GO:0005886~plasma membrane,GO:0098552~side of membrane,	GO:0008270~zinc ion binding,GO:0042277~peptide binding,GO:0070006~metalloaminopeptidase activity,
LOC105423902	aminopeptidase N-like(LOC105423902)	Pogonomyrmex barbatus	GO:0006508~proteolysis,GO:0043171~peptide catabolic process,	GO:0005615~extracellular space,GO:0005737~cytoplasm,GO:0016020~membrane,	GO:0008270~zinc ion binding,GO:0042277~peptide binding,GO:0070006~metalloaminopeptidase activity,
LOC105424668	aminopeptidase N-like(LOC105424668)	Pogonomyrmex barbatus	GO:0006508~proteolysis,GO:0043171~peptide catabolic process,	GO:0005615~extracellular space,GO:0005737~cytoplasm,GO:0005886~plasma membrane,GO:0098552~side of membrane,	GO:0008270~zinc ion binding,GO:0042277~peptide binding,GO:0070006~metalloaminopeptidase activity,	pbar00480:Glutathione metabolism,pbar01100:Metabolic pathways,
LOC105426295	aminopeptidase N-like(LOC105426295)	Pogonomyrmex barbatus	GO:0006508~proteolysis,GO:0043171~peptide catabolic process,	GO:0005615~extracellular space,GO:0005737~cytoplasm,GO:0005886~plasma membrane,GO:0098552~side of membrane,	GO:0008270~zinc ion binding,GO:0042277~peptide binding,GO:0070006~metalloaminopeptidase activity,	pbar00480:Glutathione metabolism,pbar01100:Metabolic pathways,
LOC105426296	aminopeptidase N-like(LOC105426296)	Pogonomyrmex barbatus	GO:0006508~proteolysis,GO:0043171~peptide catabolic process,	GO:0005615~extracellular space,GO:0005737~cytoplasm,GO:0016020~membrane,	GO:0008270~zinc ion binding,GO:0042277~peptide binding,GO:0070006~metalloaminopeptidase activity,	pbar00480:Glutathione metabolism,pbar01100:Metabolic pathways,
LOC105426297	aminopeptidase N-like(LOC105426297)	Pogonomyrmex barbatus	GO:0006508~proteolysis,GO:0043171~peptide catabolic process,	GO:0005615~extracellular space,GO:0005737~cytoplasm,GO:0016020~membrane,	GO:0008270~zinc ion binding,GO:0042277~peptide binding,GO:0070006~metalloaminopeptidase activity,	pbar00480:Glutathione metabolism,pbar01100:Metabolic pathways,
LOC105426304	aminopeptidase N-like(LOC105426304)	Pogonomyrmex barbatus	GO:0006508~proteolysis,GO:0043171~peptide catabolic process,	GO:0005615~extracellular space,GO:0005737~cytoplasm,GO:0016020~membrane,	GO:0008270~zinc ion binding,GO:0042277~peptide binding,GO:0070006~metalloaminopeptidase activity,	pbar00480:Glutathione metabolism,pbar01100:Metabolic pathways,
LOC105427276	aminopeptidase N-like(LOC105427276)	Pogonomyrmex barbatus	GO:0006508~proteolysis,GO:0043171~peptide catabolic process,	GO:0005615~extracellular space,GO:0005737~cytoplasm,GO:0005886~plasma membrane,GO:0098552~side of membrane,	GO:0008270~zinc ion binding,GO:0042277~peptide binding,GO:0070006~metalloaminopeptidase activity,
LOC105427277	aminopeptidase N-like(LOC105427277)	Pogonomyrmex barbatus	GO:0006508~proteolysis,GO:0043171~peptide catabolic process,	GO:0005615~extracellular space,GO:0005737~cytoplasm,GO:0016020~membrane,	GO:0008270~zinc ion binding,GO:0042277~peptide binding,GO:0070006~metalloaminopeptidase activity,
LOC105430715	aminopeptidase N-like(LOC105430715)	Pogonomyrmex barbatus	GO:0006508~proteolysis,GO:0043171~peptide catabolic process,	GO:0005615~extracellular space,GO:0005737~cytoplasm,GO:0016020~membrane,	GO:0008270~zinc ion binding,GO:0042277~peptide binding,GO:0070006~metalloaminopeptidase activity,	pbar00480:Glutathione metabolism,pbar01100:Metabolic pathways,
LOC105430724	aminopeptidase N-like(LOC105430724)	Pogonomyrmex barbatus	GO:0006508~proteolysis,GO:0043171~peptide catabolic process,	GO:0005615~extracellular space,GO:0005737~cytoplasm,GO:0016020~membrane,	GO:0008270~zinc ion binding,GO:0042277~peptide binding,GO:0070006~metalloaminopeptidase activity,
LOC105430784	aminopeptidase N-like(LOC105430784)	Pogonomyrmex barbatus	GO:0006508~proteolysis,GO:0043171~peptide catabolic process,	GO:0005615~extracellular space,GO:0005737~cytoplasm,GO:0016020~membrane,	GO:0008270~zinc ion binding,GO:0042277~peptide binding,GO:0070006~metalloaminopeptidase activity,
LOC105430903	aminopeptidase N-like(LOC105430903)	Pogonomyrmex barbatus	GO:0006508~proteolysis,GO:0043171~peptide catabolic process,	GO:0005615~extracellular space,GO:0005737~cytoplasm,GO:0016020~membrane,	GO:0008270~zinc ion binding,GO:0042277~peptide binding,GO:0070006~metalloaminopeptidase activity,
LOC105431282	aminopeptidase N-like(LOC105431282)	Pogonomyrmex barbatus	GO:0006508~proteolysis,GO:0043171~peptide catabolic process,	GO:0005615~extracellular space,GO:0005737~cytoplasm,GO:0016020~membrane,	GO:0008270~zinc ion binding,GO:0042277~peptide binding,GO:0070006~metalloaminopeptidase activity,
LOC105432323	aminopeptidase N-like(LOC105432323)	Pogonomyrmex barbatus	GO:0006508~proteolysis,GO:0043171~peptide catabolic process,	GO:0005615~extracellular space,GO:0005737~cytoplasm,GO:0016020~membrane,	GO:0008270~zinc ion binding,GO:0042277~peptide binding,GO:0070006~metalloaminopeptidase activity,	pbar00480:Glutathione metabolism,pbar01100:Metabolic pathways,
LOC112552291	aminopeptidase N-like(LOC112552291)	Pogonomyrmex barbatus			GO:0008237~metallopeptidase activity,GO:0008270~zinc ion binding,
LOC112552297	aminopeptidase N-like(LOC112552297)	Pogonomyrmex barbatus	GO:0006508~proteolysis,GO:0043171~peptide catabolic process,	GO:0005615~extracellular space,GO:0005737~cytoplasm,GO:0005886~plasma membrane,GO:0098552~side of membrane,	GO:0008270~zinc ion binding,GO:0042277~peptide binding,GO:0070006~metalloaminopeptidase activity,
LOC112552308	aminopeptidase N-like(LOC112552308)	Pogonomyrmex barbatus			GO:0004177~aminopeptidase activity,GO:0008237~metallopeptidase activity,GO:0008270~zinc ion binding,
LOC105422452	aminopeptidase Q-like(LOC105422452)	Pogonomyrmex barbatus			GO:0004177~aminopeptidase activity,GO:0008237~metallopeptidase activity,GO:0008270~zinc ion binding,
LOC105422812	aminopeptidase Q-like(LOC105422812)	Pogonomyrmex barbatus	GO:0006508~proteolysis,GO:0043171~peptide catabolic process,	GO:0005615~extracellular space,GO:0005737~cytoplasm,GO:0005886~plasma membrane,GO:0098552~side of membrane,	GO:0008270~zinc ion binding,GO:0042277~peptide binding,GO:0070006~metalloaminopeptidase activity,	pbar00480:Glutathione metabolism,pbar01100:Metabolic pathways,
LOC105423623	aminopeptidase Q-like(LOC105423623)	Pogonomyrmex barbatus	GO:0006508~proteolysis,GO:0043171~peptide catabolic process,	GO:0005615~extracellular space,GO:0005737~cytoplasm,GO:0016020~membrane,	GO:0008237~metallopeptidase activity,GO:0008270~zinc ion binding,GO:0042277~peptide binding,GO:0070006~metalloaminopeptidase activity,
LOC105426624	anillin(LOC105426624)	Pogonomyrmex barbatus	GO:0000281~mitotic cytokinesis,GO:0000915~actomyosin contractile ring assembly,GO:0031106~septin ring organization,	GO:0005826~actomyosin contractile ring,
LOC112552352	arginine kinase(LOC112552352)	Pogonomyrmex barbatus	GO:0046314~phosphocreatine biosynthetic process,	GO:0005615~extracellular space,	GO:0004054~arginine kinase activity,GO:0004111~creatine kinase activity,GO:0005524~ATP binding,
LOC105427806	aurora B(aurB)	Pogonomyrmex barbatus	GO:0006468~protein phosphorylation,GO:0007052~mitotic spindle organization,GO:0032465~regulation of cytokinesis,	GO:0005876~spindle microtubule,GO:0031616~spindle pole centrosome,GO:0032133~chromosome passenger complex,GO:0051233~spindle midzone,	GO:0004672~protein kinase activity,GO:0004676~3-phosphoinositide-dependent protein kinase activity,GO:0004677~DNA-dependent protein kinase activity,GO:0004679~AMP-activated protein kinase activity,GO:0004694~eukaryotic translation initiation factor 2alpha kinase activity,GO:0004711~ribosomal protein S6 kinase activity,GO:0005524~ATP binding,GO:0035175~histone H3S10 kinase activity,GO:0035402~hist…	pbar03083:Polycomb repressive complex,
LOC105432109	aurora kinase A activator-like protein bora(bora)	Pogonomyrmex barbatus	GO:0007088~regulation of mitotic nuclear division,GO:0032147~activation of protein kinase activity,GO:0051301~cell division,GO:0060236~regulation of mitotic spindle organization,	GO:0005634~nucleus,GO:0005737~cytoplasm,	GO:0019901~protein kinase binding,
LOC105431214	aurora kinase C-like(LOC105431214)	Pogonomyrmex barbatus	GO:0006468~protein phosphorylation,GO:0007052~mitotic spindle organization,GO:0032465~regulation of cytokinesis,	GO:0005819~spindle,GO:0005876~spindle microtubule,GO:0031616~spindle pole centrosome,GO:0032133~chromosome passenger complex,GO:0051233~spindle midzone,	GO:0004672~protein kinase activity,GO:0004676~3-phosphoinositide-dependent protein kinase activity,GO:0004677~DNA-dependent protein kinase activity,GO:0004679~AMP-activated protein kinase activity,GO:0004694~eukaryotic translation initiation factor 2alpha kinase activity,GO:0004711~ribosomal protein S6 kinase activity,GO:0005524~ATP binding,GO:0035175~histone H3S10 kinase activity,GO:0035402~hist…
LOC105430399	axundead(axed)	Pogonomyrmex barbatus	GO:0022008~neurogenesis,	GO:0005829~cytosol,	GO:0005515~protein binding,
LOC105423533	bedraggled(bdg)	Pogonomyrmex barbatus	GO:0035725~sodium ion transmembrane transport,GO:0089718~amino acid import across plasma membrane,	GO:0005886~plasma membrane,GO:0016020~membrane,	GO:0005283~amino acid:sodium symporter activity,GO:0015179~L-amino acid transmembrane transporter activity,GO:0046872~metal ion binding,
LOC105427233	beta-1,3-galactosyltransferase 5-like(LOC105427233)	Pogonomyrmex barbatus	GO:0006486~protein glycosylation,GO:0006493~protein O-linked glycosylation,	GO:0000139~Golgi membrane,GO:0016020~membrane,	GO:0016758~hexosyltransferase activity,
LOC105428700	borealin-related(borr)	Pogonomyrmex barbatus	GO:0000070~mitotic sister chromatid segregation,GO:0051301~cell division,	GO:0000775~chromosome, centromeric region,GO:0005634~nucleus,GO:0032133~chromosome passenger complex,GO:0051233~spindle midzone,
LOC105430518	bromodomain-containing protein 140(Br140)	Pogonomyrmex barbatus	GO:0006357~regulation of transcription by RNA polymerase II,	GO:0005634~nucleus,GO:0070776~MOZ/MORF histone acetyltransferase complex,	GO:0005515~protein binding,GO:0046872~metal ion binding,
LOC105431607	cadherin-23(LOC105431607)	Pogonomyrmex barbatus	GO:0002009~morphogenesis of an epithelium,GO:0007156~homophilic cell adhesion via plasma membrane adhesion molecules,	GO:0005886~plasma membrane,GO:0016342~catenin complex,	GO:0005509~calcium ion binding,GO:0045296~cadherin binding,
LOC105427869	cadherin-related tumor suppressor fat(ft)	Pogonomyrmex barbatus	GO:0001736~establishment of planar polarity,GO:0007156~homophilic cell adhesion via plasma membrane adhesion molecules,GO:0007163~establishment or maintenance of cell polarity,GO:0030154~cell differentiation,GO:0048513~animal organ development,GO:0048589~developmental growth,	GO:0005886~plasma membrane,GO:0005911~cell-cell junction,GO:0016342~catenin complex,	GO:0005509~calcium ion binding,GO:0045296~cadherin binding,	pbar04391:Hippo signaling pathway - fly,pbar04392:Hippo signaling pathway - multiple species,
LOC105425998	carbohydrate sulfotransferase 11-like(LOC105425998)	Pogonomyrmex barbatus	GO:0016051~carbohydrate biosynthetic process,	GO:0000139~Golgi membrane,GO:0016020~membrane,	GO:0008146~sulfotransferase activity,	pbar00532:Glycosaminoglycan biosynthesis - chondroitin sulfate / dermatan sulfate,
LOC105430112	carbohydrate sulfotransferase 11-like(LOC105430112)	Pogonomyrmex barbatus	GO:0016051~carbohydrate biosynthetic process,	GO:0000139~Golgi membrane,GO:0016020~membrane,	GO:0008146~sulfotransferase activity,
LOC105422849	carboxypeptidase B-like(LOC105422849)	Pogonomyrmex barbatus	GO:0006508~proteolysis,	GO:0005615~extracellular space,	GO:0004181~metallocarboxypeptidase activity,GO:0008270~zinc ion binding,
LOC105424849	carboxypeptidase M(LOC105424849)	Pogonomyrmex barbatus	GO:0006508~proteolysis,GO:0006518~peptide metabolic process,GO:0016485~protein processing,	GO:0005615~extracellular space,GO:0009986~cell surface,	GO:0004181~metallocarboxypeptidase activity,GO:0008270~zinc ion binding,
LOC105427482	carcinine transporter-like(LOC105427482)	Pogonomyrmex barbatus	GO:0055085~transmembrane transport,	GO:0016020~membrane,	GO:0022857~transmembrane transporter activity,
LOC105433784	caspase-1-like(LOC105433784)	Pogonomyrmex barbatus	GO:0006508~proteolysis,GO:0006915~apoptotic process,GO:0043525~positive regulation of neuron apoptotic process,	GO:0005737~cytoplasm,	GO:0004197~cysteine-type endopeptidase activity,
LOC105424500	cell division cycle 20 protein fzy(fzy)	Pogonomyrmex barbatus	GO:0031145~anaphase-promoting complex-dependent catabolic process,GO:0051301~cell division,GO:1904668~positive regulation of ubiquitin protein ligase activity,GO:1905786~positive regulation of anaphase-promoting complex-dependent catabolic process,	GO:0005680~anaphase-promoting complex,	GO:0005515~protein binding,GO:0010997~anaphase-promoting complex binding,GO:1990757~ubiquitin ligase activator activity,	pbar04120:Ubiquitin mediated proteolysis,
LOC105424497	cell division cycle protein 14(cdc14)	Pogonomyrmex barbatus	GO:0000226~microtubule cytoskeleton organization,GO:0006470~protein dephosphorylation,GO:0007096~regulation of exit from mitosis,GO:0032467~positive regulation of cytokinesis,GO:0051301~cell division,GO:0060271~cilium assembly,	GO:0000922~spindle pole,GO:0005634~nucleus,GO:0005730~nucleolus,GO:0005737~cytoplasm,GO:0005813~centrosome,GO:0043232~intracellular membraneless organelle,GO:0072686~mitotic spindle,GO:1902636~kinociliary basal body,	GO:0004722~protein serine/threonine phosphatase activity,GO:0004726~non-membrane spanning protein tyrosine phosphatase activity,GO:0008138~protein tyrosine/serine/threonine phosphatase activity,GO:0030946~protein tyrosine phosphatase activity, metal-dependent,GO:0140793~histone H2AXY142 phosphatase activity,
LOC105434247	cell growth-regulating nucleolar protein(LOC105434247)	Pogonomyrmex barbatus	GO:0000122~negative regulation of transcription by RNA polymerase II,GO:0006364~rRNA processing,	GO:0005730~nucleolus,	GO:0003677~DNA binding,GO:0046872~metal ion binding,
LOC105423588	charlatan(chn)	Pogonomyrmex barbatus	GO:0006357~regulation of transcription by RNA polymerase II,GO:0035282~segmentation,	GO:0005634~nucleus,GO:0005694~chromosome,	GO:0000978~RNA polymerase II cis-regulatory region sequence-specific DNA binding,GO:0001228~DNA-binding transcription activator activity, RNA polymerase II-specific,GO:0043035~chromatin insulator sequence binding,GO:0046872~metal ion binding,
LOC105427195	chitinase 7(Cht7)	Pogonomyrmex barbatus	GO:0005975~carbohydrate metabolic process,GO:0006032~chitin catabolic process,	GO:0005576~extracellular region,	GO:0004553~hydrolase activity, hydrolyzing O-glycosyl compounds,GO:0004568~chitinase activity,GO:0008061~chitin binding,	pbar00520:Amino sugar and nucleotide sugar metabolism,pbar01100:Metabolic pathways,
LOC105433484	chondroadherin(LOC105433484)	Pogonomyrmex barbatus	GO:0006357~regulation of transcription by RNA polymerase II,GO:0048468~cell development,	GO:0005615~extracellular space,GO:0005634~nucleus,GO:0016020~membrane,GO:0031012~extracellular matrix,	GO:0005515~protein binding,
LOC105424592	chondroitin sulfate proteoglycan 4-like protein(kon)	Pogonomyrmex barbatus	GO:0009653~anatomical structure morphogenesis,	GO:0016020~membrane,GO:0062023~collagen-containing extracellular matrix,
LOC105432556	chymotrypsin-2-like(LOC105432556)	Pogonomyrmex barbatus	GO:0006508~proteolysis,		GO:0004252~serine-type endopeptidase activity,
LOC105432557	chymotrypsin-2-like(LOC105432557)	Pogonomyrmex barbatus	GO:0006508~proteolysis,	GO:0005576~extracellular region,GO:0016020~membrane,	GO:0004252~serine-type endopeptidase activity,	pbar04080:Neuroactive ligand-receptor interaction,
LOC105429681	cilia- and flagella-associated protein 52(LOC105429681)	Pogonomyrmex barbatus	GO:0060271~cilium assembly,	GO:0005930~axoneme,GO:0016020~membrane,GO:0031514~motile cilium,	GO:0005515~protein binding,
LOC105423226	circadian clock-controlled protein-like(LOC105423226)	Pogonomyrmex barbatus		GO:0005615~extracellular space,
LOC105424280	citrate synthase-like(LOC105424280)	Pogonomyrmex barbatus	GO:0005975~carbohydrate metabolic process,GO:0006099~tricarboxylic acid cycle,	GO:0005759~mitochondrial matrix,	GO:0004108~citrate (Si)-synthase activity,	pbar00020:Citrate cycle (TCA cycle),pbar00630:Glyoxylate and dicarboxylate metabolism,pbar01100:Metabolic pathways,pbar01200:Carbon metabolism,pbar01210:2-Oxocarboxylic acid metabolism,pbar01230:Biosynthesis of amino acids,
LOC105422936	coiled-coil domain-containing protein 113(LOC105422936)	Pogonomyrmex barbatus	GO:0060271~cilium assembly,	GO:0005930~axoneme,GO:0036064~ciliary basal body,
LOC105427213	coiled-coil domain-containing protein 39(LOC105427213)	Pogonomyrmex barbatus	GO:0003341~cilium movement,GO:0036159~inner dynein arm assembly,GO:0060285~cilium-dependent cell motility,GO:0060287~epithelial cilium movement involved in determination of left/right asymmetry,	GO:0005576~extracellular region,GO:0005930~axoneme,
LOC105427800	condensin complex subunit 2(LOC105427800)	Pogonomyrmex barbatus	GO:0007076~mitotic chromosome condensation,GO:0051301~cell division,	GO:0000796~condensin complex,GO:0005737~cytoplasm,	GO:0003682~chromatin binding,
LOC105431262	convoluted(conv)	Pogonomyrmex barbatus	GO:0048468~cell development,	GO:0071944~cell periphery,	GO:0005515~protein binding,GO:0005524~ATP binding,
LOC105432865	crocodile(croc)	Pogonomyrmex barbatus	GO:0006357~regulation of transcription by RNA polymerase II,GO:0009653~anatomical structure morphogenesis,GO:0030154~cell differentiation,	GO:0005634~nucleus,	GO:0000978~RNA polymerase II cis-regulatory region sequence-specific DNA binding,GO:0000981~DNA-binding transcription factor activity, RNA polymerase II-specific,
LOC105425917	cryptochrome 2(Cry2)	Pogonomyrmex barbatus	GO:0032922~circadian regulation of gene expression,GO:0043153~entrainment of circadian clock by photoperiod,GO:0045892~negative regulation of DNA-templated transcription,	GO:0005634~nucleus,GO:0005737~cytoplasm,	GO:0003677~DNA binding,GO:0071949~FAD binding,
LOC105423420	cuticular protein 17(CPR17)	Pogonomyrmex barbatus		GO:0062129~chitin-based extracellular matrix,	GO:0008010~structural constituent of chitin-based larval cuticle,
LOC105428084	cyclin A(CycA)	Pogonomyrmex barbatus	GO:0000079~regulation of cyclin-dependent protein serine/threonine kinase activity,GO:0000278~mitotic cell cycle,GO:0044772~mitotic cell cycle phase transition,GO:0051301~cell division,	GO:0005634~nucleus,GO:0005737~cytoplasm,GO:0097124~cyclin A2-CDK2 complex,	GO:0016538~cyclin-dependent protein serine/threonine kinase regulator activity,
LOC105434013	cyclin B3(CycB3)	Pogonomyrmex barbatus	GO:0000079~regulation of cyclin-dependent protein serine/threonine kinase activity,GO:0044772~mitotic cell cycle phase transition,GO:0051301~cell division,	GO:0000307~cyclin-dependent protein kinase holoenzyme complex,GO:0005634~nucleus,GO:0005737~cytoplasm,GO:0005813~centrosome,	GO:0016538~cyclin-dependent protein serine/threonine kinase regulator activity,	pbar04068:FoxO signaling pathway,
LOC105430356	cyclin-dependent kinase-like 4(LOC105430356)	Pogonomyrmex barbatus	GO:0006468~protein phosphorylation,	GO:0005634~nucleus,	GO:0004674~protein serine/threonine kinase activity,GO:0004693~cyclin-dependent protein serine/threonine kinase activity,GO:0005524~ATP binding,
LOC105430065	cysteine and histidine-rich protein 1 homolog(LOC105430065)	Pogonomyrmex barbatus		GO:0005634~nucleus,	GO:0008270~zinc ion binding,
LOC105434257	cysteine dioxygenase type 1(LOC105434257)	Pogonomyrmex barbatus	GO:0019448~L-cysteine catabolic process,GO:0042412~taurine biosynthetic process,	GO:0016020~membrane,	GO:0008198~ferrous iron binding,GO:0017172~cysteine dioxygenase activity,	pbar00270:Cysteine and methionine metabolism,pbar00430:Taurine and hypotaurine metabolism,pbar01100:Metabolic pathways,
LOC105424405	cysteine-rich protein 1-like(LOC105424405)	Pogonomyrmex barbatus			GO:0046872~metal ion binding,
LOC105426322	cytochrome P450 307a1-like(LOC105426322)	Pogonomyrmex barbatus			GO:0004497~monooxygenase activity,GO:0005506~iron ion binding,GO:0016705~oxidoreductase activity, acting on paired donors, with incorporation or reduction of molecular oxygen,GO:0020037~heme binding,	pbar00981:Insect hormone biosynthesis,
LOC105423309	cytochrome P450 4C1-like(LOC105423309)	Pogonomyrmex barbatus		GO:0005789~endoplasmic reticulum membrane,	GO:0004497~monooxygenase activity,GO:0005506~iron ion binding,GO:0016705~oxidoreductase activity, acting on paired donors, with incorporation or reduction of molecular oxygen,GO:0020037~heme binding,
LOC105424055	cytochrome P450 4C1-like(LOC105424055)	Pogonomyrmex barbatus		GO:0005789~endoplasmic reticulum membrane,	GO:0004497~monooxygenase activity,GO:0005506~iron ion binding,GO:0016705~oxidoreductase activity, acting on paired donors, with incorporation or reduction of molecular oxygen,GO:0020037~heme binding,
LOC105424757	cytochrome P450 4C1-like(LOC105424757)	Pogonomyrmex barbatus		GO:0005789~endoplasmic reticulum membrane,	GO:0004497~monooxygenase activity,GO:0005506~iron ion binding,GO:0016705~oxidoreductase activity, acting on paired donors, with incorporation or reduction of molecular oxygen,GO:0020037~heme binding,
LOC105426293	cytochrome P450 4C1-like(LOC105426293)	Pogonomyrmex barbatus		GO:0005789~endoplasmic reticulum membrane,	GO:0004497~monooxygenase activity,GO:0005506~iron ion binding,GO:0016705~oxidoreductase activity, acting on paired donors, with incorporation or reduction of molecular oxygen,GO:0020037~heme binding,
LOC105426294	cytochrome P450 4C1-like(LOC105426294)	Pogonomyrmex barbatus		GO:0005789~endoplasmic reticulum membrane,	GO:0004497~monooxygenase activity,GO:0005506~iron ion binding,GO:0016705~oxidoreductase activity, acting on paired donors, with incorporation or reduction of molecular oxygen,GO:0020037~heme binding,
LOC105428055	cytochrome P450 4C1-like(LOC105428055)	Pogonomyrmex barbatus		GO:0005789~endoplasmic reticulum membrane,	GO:0004497~monooxygenase activity,GO:0005506~iron ion binding,GO:0016705~oxidoreductase activity, acting on paired donors, with incorporation or reduction of molecular oxygen,GO:0020037~heme binding,
LOC105428273	cytochrome P450 4C1-like(LOC105428273)	Pogonomyrmex barbatus			GO:0004497~monooxygenase activity,GO:0005506~iron ion binding,GO:0016705~oxidoreductase activity, acting on paired donors, with incorporation or reduction of molecular oxygen,GO:0020037~heme binding,
LOC105431177	cytochrome P450 4V2-like(LOC105431177)	Pogonomyrmex barbatus		GO:0005789~endoplasmic reticulum membrane,	GO:0004497~monooxygenase activity,GO:0005506~iron ion binding,GO:0016705~oxidoreductase activity, acting on paired donors, with incorporation or reduction of molecular oxygen,GO:0020037~heme binding,
LOC105423256	cytochrome b5-like(LOC105423256)	Pogonomyrmex barbatus		GO:0016020~membrane,GO:0043231~intracellular membrane-bounded organelle,	GO:0020037~heme binding,
LOC112553013	cytosolic 5'-nucleotidase IIIB(cN-IIIB)	Pogonomyrmex barbatus	GO:0009117~nucleotide metabolic process,	GO:0005737~cytoplasm,	GO:0000166~nucleotide binding,GO:0000287~magnesium ion binding,GO:0008253~5'-nucleotidase activity,
LOC105426464	dehydrogenase/reductase SDR family member 7(LOC105426464)	Pogonomyrmex barbatus		GO:0016020~membrane,
LOC105430131	dentin sialophosphoprotein-like(LOC105430131)	Pogonomyrmex barbatus		GO:0005576~extracellular region,	GO:0008061~chitin binding,
LOC105432019	deoxycytidylate deaminase(LOC105432019)	Pogonomyrmex barbatus	GO:0006220~pyrimidine nucleotide metabolic process,GO:0006226~dUMP biosynthetic process,GO:0006231~dTMP biosynthetic process,GO:0009972~cytidine deamination,	GO:0005737~cytoplasm,	GO:0004132~dCMP deaminase activity,GO:0008270~zinc ion binding,	pbar00240:Pyrimidine metabolism,pbar01100:Metabolic pathways,pbar01232:Nucleotide metabolism,
LOC105423908	diacyl glycerol kinase 1(Dgk)	Pogonomyrmex barbatus	GO:0007200~phospholipase C-activating G protein-coupled receptor signaling pathway,GO:0035556~intracellular signal transduction,GO:0046339~diacylglycerol metabolic process,GO:0046834~lipid phosphorylation,	GO:0005886~plasma membrane,	GO:0004143~ATP-dependent diacylglycerol kinase activity,GO:0005509~calcium ion binding,GO:0005524~ATP binding,	pbar00561:Glycerolipid metabolism,pbar00564:Glycerophospholipid metabolism,pbar01100:Metabolic pathways,pbar04070:Phosphatidylinositol signaling system,
LOC105427198	diacylglycerol kinase epsilon(Dgkepsilon)	Pogonomyrmex barbatus	GO:0007200~phospholipase C-activating G protein-coupled receptor signaling pathway,	GO:0016020~membrane,	GO:0004143~ATP-dependent diacylglycerol kinase activity,GO:0005524~ATP binding,GO:0046872~metal ion binding,	pbar00561:Glycerolipid metabolism,pbar00564:Glycerophospholipid metabolism,pbar01100:Metabolic pathways,pbar04070:Phosphatidylinositol signaling system,
LOC105433455	dihydrofolate reductase(Dhfr)	Pogonomyrmex barbatus	GO:0006545~glycine biosynthetic process,GO:0006730~one-carbon metabolic process,GO:0046452~dihydrofolate metabolic process,GO:0046654~tetrahydrofolate biosynthetic process,GO:0046655~folic acid metabolic process,	GO:0005739~mitochondrion,	GO:0004146~dihydrofolate reductase activity,GO:0050661~NADP binding,	pbar00670:One carbon pool by folate,pbar00790:Folate biosynthesis,pbar01100:Metabolic pathways,pbar01240:Biosynthesis of cofactors,pbar04981:Folate transport and metabolism,
LOC105427386	dim gamma-tubulin 3(dgt3)	Pogonomyrmex barbatus	GO:0007098~centrosome cycle,GO:0031023~microtubule organizing center organization,GO:0051225~spindle assembly,GO:0051301~cell division,	GO:0005737~cytoplasm,GO:0005813~centrosome,GO:0005815~microtubule organizing center,GO:0005874~microtubule,GO:0070652~HAUS complex,GO:0072686~mitotic spindle,
LOC105426362	diphthine methyltransferase(LOC105426362)	Pogonomyrmex barbatus	GO:0017183~protein histidyl modification to diphthamide,GO:0032259~methylation,	GO:0005737~cytoplasm,	GO:0005515~protein binding,GO:0008168~methyltransferase activity,GO:0061685~diphthine methylesterase activity,
LOC105430268	discoidin domain-containing receptor 2(Ddr)	Pogonomyrmex barbatus	GO:0006468~protein phosphorylation,GO:0007169~cell surface receptor protein tyrosine kinase signaling pathway,GO:0007275~multicellular organism development,GO:0010976~positive regulation of neuron projection development,GO:0033674~positive regulation of kinase activity,GO:0051897~positive regulation of phosphatidylinositol 3-kinase/protein kinase B signal transduction,	GO:0005886~plasma membrane,GO:0043235~receptor complex,	GO:0005518~collagen binding,GO:0005524~ATP binding,GO:0038062~protein tyrosine kinase collagen receptor activity,
LOC105430103	disintegrin and metalloproteinase domain-containing protein 10(LOC105430103)	Pogonomyrmex barbatus	GO:0006509~membrane protein ectodomain proteolysis,GO:0007219~Notch signaling pathway,	GO:0005886~plasma membrane,	GO:0004222~metalloendopeptidase activity,GO:0046872~metal ion binding,	pbar04148:Efferocytosis,
LOC105428651	disks large-associated protein 5(LOC105428651)	Pogonomyrmex barbatus	GO:0007052~mitotic spindle organization,GO:0007059~chromosome segregation,GO:0007346~regulation of mitotic cell cycle,GO:0023052~signaling,GO:0051382~kinetochore assembly,GO:0051642~centrosome localization,	GO:0005634~nucleus,GO:0005737~cytoplasm,GO:0031616~spindle pole centrosome,	GO:0008017~microtubule binding,
LOC105422054	doublesex-Mab related 99B(dmrt99B)	Pogonomyrmex barbatus	GO:0006357~regulation of transcription by RNA polymerase II,GO:0007548~sex differentiation,	GO:0005634~nucleus,	GO:0000978~RNA polymerase II cis-regulatory region sequence-specific DNA binding,GO:0000981~DNA-binding transcription factor activity, RNA polymerase II-specific,GO:0005515~protein binding,GO:0046872~metal ion binding,
LOC105422772	drumstick(drm)	Pogonomyrmex barbatus	GO:0006357~regulation of transcription by RNA polymerase II,GO:0009790~embryo development,GO:0009880~embryonic pattern specification,GO:0009887~animal organ morphogenesis,GO:0048619~embryonic hindgut morphogenesis,	GO:0005634~nucleus,	GO:0000977~RNA polymerase II transcription regulatory region sequence-specific DNA binding,GO:0000981~DNA-binding transcription factor activity, RNA polymerase II-specific,GO:0046872~metal ion binding,
LOC112553072	dual oxidase-like(LOC112553072)	Pogonomyrmex barbatus	GO:0006979~response to oxidative stress,		GO:0004601~peroxidase activity,GO:0020037~heme binding,
LOC105422215	dynein assembly factor with WDR repeat domains 1-like(LOC105422215)	Pogonomyrmex barbatus	GO:0000398~mRNA splicing, via spliceosome,	GO:0046540~U4/U6 x U5 tri-snRNP complex,	GO:0005515~protein binding,GO:0017070~U6 snRNA binding,GO:0030621~U4 snRNA binding,
LOC105434277	dystrophin-like(LOC105434277)	Pogonomyrmex barbatus	GO:0046716~muscle cell cellular homeostasis,GO:0050804~modulation of chemical synaptic transmission,GO:0099536~synaptic signaling,	GO:0005737~cytoplasm,GO:0005856~cytoskeleton,GO:0005886~plasma membrane,GO:0016010~dystrophin-associated glycoprotein complex,GO:0042383~sarcolemma,GO:0045202~synapse,	GO:0008270~zinc ion binding,
LOC105429762	elongation of very long chain fatty acids protein 4-like(LOC105429762)	Pogonomyrmex barbatus	GO:0019367~fatty acid elongation, saturated fatty acid,GO:0030148~sphingolipid biosynthetic process,GO:0034625~fatty acid elongation, monounsaturated fatty acid,GO:0034626~fatty acid elongation, polyunsaturated fatty acid,GO:0042761~very long-chain fatty acid biosynthetic process,	GO:0005789~endoplasmic reticulum membrane,	GO:0009922~fatty acid elongase activity,	pbar00062:Fatty acid elongation,pbar01040:Biosynthesis of unsaturated fatty acids,pbar01100:Metabolic pathways,pbar01212:Fatty acid metabolism,
LOC105431030	elongation of very long chain fatty acids protein AAEL008004-like(LOC105431030)	Pogonomyrmex barbatus	GO:0019367~fatty acid elongation, saturated fatty acid,GO:0030148~sphingolipid biosynthetic process,GO:0034625~fatty acid elongation, monounsaturated fatty acid,GO:0034626~fatty acid elongation, polyunsaturated fatty acid,GO:0042761~very long-chain fatty acid biosynthetic process,	GO:0005789~endoplasmic reticulum membrane,	GO:0009922~fatty acid elongase activity,	pbar00062:Fatty acid elongation,pbar01040:Biosynthesis of unsaturated fatty acids,pbar01100:Metabolic pathways,pbar01212:Fatty acid metabolism,
LOC105431152	elongation of very long chain fatty acids protein AAEL008004-like(LOC105431152)	Pogonomyrmex barbatus	GO:0019367~fatty acid elongation, saturated fatty acid,GO:0030148~sphingolipid biosynthetic process,GO:0034625~fatty acid elongation, monounsaturated fatty acid,GO:0034626~fatty acid elongation, polyunsaturated fatty acid,GO:0042761~very long-chain fatty acid biosynthetic process,	GO:0005789~endoplasmic reticulum membrane,	GO:0009922~fatty acid elongase activity,
LOC105424255	endochitinase(LOC105424255)	Pogonomyrmex barbatus	GO:0005975~carbohydrate metabolic process,GO:0006032~chitin catabolic process,	GO:0005576~extracellular region,	GO:0004568~chitinase activity,GO:0008061~chitin binding,	pbar00520:Amino sugar and nucleotide sugar metabolism,pbar01100:Metabolic pathways,
LOC105428628	endocuticle structural glycoprotein SgAbd-2-like(LOC105428628)	Pogonomyrmex barbatus		GO:0062129~chitin-based extracellular matrix,	GO:0008010~structural constituent of chitin-based larval cuticle,
LOC105428629	endocuticle structural glycoprotein SgAbd-2-like(LOC105428629)	Pogonomyrmex barbatus		GO:0016020~membrane,GO:0062129~chitin-based extracellular matrix,	GO:0008010~structural constituent of chitin-based larval cuticle,
LOC105422712	endoplasmic reticulum aminopeptidase 1-like(LOC105422712)	Pogonomyrmex barbatus	GO:0006508~proteolysis,GO:0043171~peptide catabolic process,	GO:0005615~extracellular space,GO:0005737~cytoplasm,GO:0016020~membrane,	GO:0008270~zinc ion binding,GO:0042277~peptide binding,GO:0070006~metalloaminopeptidase activity,
LOC105426298	endoplasmic reticulum aminopeptidase 1-like(LOC105426298)	Pogonomyrmex barbatus	GO:0006508~proteolysis,GO:0043171~peptide catabolic process,	GO:0005615~extracellular space,GO:0005737~cytoplasm,GO:0016020~membrane,	GO:0008270~zinc ion binding,GO:0042277~peptide binding,GO:0070006~metalloaminopeptidase activity,
LOC105423995	ester hydrolase C11orf54 homolog(LOC105423995)	Pogonomyrmex barbatus		GO:0005634~nucleus,	GO:0008270~zinc ion binding,GO:0016788~hydrolase activity, acting on ester bonds,
LOC105426666	ester hydrolase C11orf54 homolog(LOC105426666)	Pogonomyrmex barbatus		GO:0005634~nucleus,	GO:0008270~zinc ion binding,GO:0016788~hydrolase activity, acting on ester bonds,
LOC105426695	ester hydrolase C11orf54 homolog(LOC105426695)	Pogonomyrmex barbatus		GO:0005634~nucleus,	GO:0008270~zinc ion binding,GO:0016788~hydrolase activity, acting on ester bonds,
LOC105422444	esterase E4-like(LOC105422444)	Pogonomyrmex barbatus			GO:0052689~carboxylic ester hydrolase activity,
LOC105422892	esterase E4-like(LOC105422892)	Pogonomyrmex barbatus			GO:0052689~carboxylic ester hydrolase activity,	pbar00100:Steroid biosynthesis,pbar00561:Glycerolipid metabolism,pbar01100:Metabolic pathways,
LOC105431295	estradiol 17-beta-dehydrogenase 11-like(LOC105431295)	Pogonomyrmex barbatus		GO:0005811~lipid droplet,GO:0016020~membrane,	GO:0016616~oxidoreductase activity, acting on the CH-OH group of donors, NAD or NADP as acceptor,	pbar00830:Retinol metabolism,pbar01100:Metabolic pathways,pbar01240:Biosynthesis of cofactors,
LOC105431433	estrogen sulfotransferase(LOC105431433)	Pogonomyrmex barbatus	GO:0051923~sulfation,	GO:0005737~cytoplasm,	GO:0008146~sulfotransferase activity,
LOC105424881	facilitated trehalose transporter Tret1-like(LOC105424881)	Pogonomyrmex barbatus	GO:0008643~carbohydrate transport,GO:0055085~transmembrane transport,	GO:0005886~plasma membrane,GO:0016020~membrane,	GO:0051119~sugar transmembrane transporter activity,
LOC105426806	facilitated trehalose transporter Tret1-like(LOC105426806)	Pogonomyrmex barbatus	GO:0008643~carbohydrate transport,GO:0055085~transmembrane transport,	GO:0005886~plasma membrane,GO:0016020~membrane,	GO:0051119~sugar transmembrane transporter activity,
LOC105428102	facilitated trehalose transporter Tret1-like(LOC105428102)	Pogonomyrmex barbatus	GO:0055085~transmembrane transport,	GO:0016020~membrane,	GO:0022857~transmembrane transporter activity,
LOC105431124	facilitated trehalose transporter Tret1-like(LOC105431124)	Pogonomyrmex barbatus	GO:0055085~transmembrane transport,	GO:0016020~membrane,	GO:0022857~transmembrane transporter activity,
LOC105433698	farnesol dehydrogenase-like(LOC105433698)	Pogonomyrmex barbatus				pbar00900:Terpenoid backbone biosynthesis,pbar00981:Insect hormone biosynthesis,
LOC105430581	farnesyl pyrophosphate synthase-like(LOC105430581)	Pogonomyrmex barbatus	GO:0042811~pheromone biosynthetic process,GO:0045337~farnesyl diphosphate biosynthetic process,	GO:0005737~cytoplasm,	GO:0004161~dimethylallyltranstransferase activity,GO:0004337~(2E,6E)-farnesyl diphosphate synthase activity,	pbar00900:Terpenoid backbone biosynthesis,pbar01100:Metabolic pathways,
LOC105430937	farnesyl pyrophosphate synthase-like(LOC105430937)	Pogonomyrmex barbatus	GO:0042811~pheromone biosynthetic process,GO:0045337~farnesyl diphosphate biosynthetic process,	GO:0005737~cytoplasm,	GO:0004161~dimethylallyltranstransferase activity,GO:0004337~(2E,6E)-farnesyl diphosphate synthase activity,	pbar00900:Terpenoid backbone biosynthesis,pbar01100:Metabolic pathways,
LOC105432610	fatty acyl-CoA reductase 2-like(LOC105432610)	Pogonomyrmex barbatus	GO:0035336~long-chain fatty-acyl-CoA metabolic process,	GO:0005777~peroxisome,GO:0016020~membrane,	GO:0080019~alcohol-forming very long-chain fatty acyl-CoA reductase activity,GO:0102965~alcohol-forming long-chain fatty acyl-CoA reductase activity,	pbar04146:Peroxisome,
LOC105428098	female sterile (1) K10(fs(1)K10)	Pogonomyrmex barbatus	GO:0000492~box C/D snoRNP assembly,	GO:0005634~nucleus,	GO:0003723~RNA binding,
LOC105423728	flavin-containing monooxygenase FMO GS-OX-like 3(LOC105423728)	Pogonomyrmex barbatus			GO:0004499~N,N-dimethylaniline monooxygenase activity,GO:0050660~flavin adenine dinucleotide binding,GO:0050661~NADP binding,
LOC105426784	forked(f)	Pogonomyrmex barbatus	GO:0051017~actin filament bundle assembly,	GO:0005737~cytoplasm,GO:0042995~cell projection,	GO:0051015~actin filament binding,
LOC105432957	forkhead box protein D3-like(LOC105432957)	Pogonomyrmex barbatus	GO:0006357~regulation of transcription by RNA polymerase II,GO:0009653~anatomical structure morphogenesis,GO:0030154~cell differentiation,	GO:0005634~nucleus,	GO:0000978~RNA polymerase II cis-regulatory region sequence-specific DNA binding,GO:0000981~DNA-binding transcription factor activity, RNA polymerase II-specific,
LOC105432864	forkhead box protein D4-like 1(LOC105432864)	Pogonomyrmex barbatus	GO:0006357~regulation of transcription by RNA polymerase II,GO:0009887~animal organ morphogenesis,	GO:0005634~nucleus,	GO:0000978~RNA polymerase II cis-regulatory region sequence-specific DNA binding,GO:0000981~DNA-binding transcription factor activity, RNA polymerase II-specific,
LOC105428157	fructose-1,6-bisphosphatase(fbp)	Pogonomyrmex barbatus	GO:0005986~sucrose biosynthetic process,GO:0006000~fructose metabolic process,GO:0006002~fructose 6-phosphate metabolic process,GO:0006094~gluconeogenesis,GO:0030388~fructose 1,6-bisphosphate metabolic process,	GO:0005737~cytoplasm,GO:0005829~cytosol,	GO:0042132~fructose 1,6-bisphosphate 1-phosphatase activity,GO:0046872~metal ion binding,	pbar00010:Glycolysis / Gluconeogenesis,pbar00030:Pentose phosphate pathway,pbar00051:Fructose and mannose metabolism,pbar01100:Metabolic pathways,pbar01200:Carbon metabolism,
LOC105433706	fructose-bisphosphate aldolase-like(LOC105433706)	Pogonomyrmex barbatus	GO:0006096~glycolytic process,GO:0030388~fructose 1,6-bisphosphate metabolic process,	GO:0005829~cytosol,	GO:0004332~fructose-bisphosphate aldolase activity,	pbar00010:Glycolysis / Gluconeogenesis,pbar00030:Pentose phosphate pathway,pbar00051:Fructose and mannose metabolism,pbar01100:Metabolic pathways,pbar01200:Carbon metabolism,pbar01230:Biosynthesis of amino acids,
LOC105422708	furrowed(fw)	Pogonomyrmex barbatus		GO:0005886~plasma membrane,GO:0016020~membrane,
LOC105428586	gamma-aminobutyric acid receptor alpha-like(LOC105428586)	Pogonomyrmex barbatus	GO:0007165~signal transduction,GO:0007268~chemical synaptic transmission,GO:0034220~monoatomic ion transmembrane transport,GO:0042391~regulation of membrane potential,GO:0050877~nervous system process,	GO:0016020~membrane,GO:0043005~neuron projection,GO:0045202~synapse,GO:0045211~postsynaptic membrane,	GO:0004890~GABA-A receptor activity,GO:0005230~extracellular ligand-gated monoatomic ion channel activity,GO:0005254~chloride channel activity,GO:0030594~neurotransmitter receptor activity,GO:0099095~ligand-gated monoatomic anion channel activity,	pbar04080:Neuroactive ligand-receptor interaction,
LOC105433867	gamma-aminobutyric acid receptor alpha-like(LOC105433867)	Pogonomyrmex barbatus	GO:0007165~signal transduction,GO:0007268~chemical synaptic transmission,GO:0034220~monoatomic ion transmembrane transport,GO:0042391~regulation of membrane potential,GO:0050877~nervous system process,	GO:0016020~membrane,GO:0043005~neuron projection,GO:0045202~synapse,	GO:0004888~transmembrane signaling receptor activity,GO:0005230~extracellular ligand-gated monoatomic ion channel activity,GO:0030594~neurotransmitter receptor activity,
LOC105431629	general odorant-binding protein 56d-like(LOC105431629)	Pogonomyrmex barbatus	GO:0007608~sensory perception of smell,	GO:0005615~extracellular space,	GO:0005549~odorant binding,
LOC105432716	gephyrin-like(LOC105432716)	Pogonomyrmex barbatus	GO:0006777~Mo-molybdopterin cofactor biosynthetic process,GO:0007529~establishment of synaptic specificity at neuromuscular junction,GO:0018315~molybdenum incorporation into molybdenum-molybdopterin complex,GO:0072579~glycine receptor clustering,GO:0097112~gamma-aminobutyric acid receptor clustering,GO:0098970~postsynaptic neurotransmitter receptor diffusion trapping,	GO:0005737~cytoplasm,GO:0005829~cytosol,GO:0030425~dendrite,GO:0045211~postsynaptic membrane,GO:0099572~postsynaptic specialization,GO:0099634~postsynaptic specialization membrane,	GO:0005524~ATP binding,GO:0046872~metal ion binding,GO:0061598~molybdopterin adenylyltransferase activity,GO:0061599~molybdopterin molybdotransferase activity,	pbar00790:Folate biosynthesis,pbar01100:Metabolic pathways,pbar01240:Biosynthesis of cofactors,
LOC105432717	gephyrin-like(LOC105432717)	Pogonomyrmex barbatus	GO:0006777~Mo-molybdopterin cofactor biosynthetic process,GO:0007529~establishment of synaptic specificity at neuromuscular junction,GO:0018315~molybdenum incorporation into molybdenum-molybdopterin complex,GO:0072579~glycine receptor clustering,GO:0097112~gamma-aminobutyric acid receptor clustering,GO:0098970~postsynaptic neurotransmitter receptor diffusion trapping,	GO:0005737~cytoplasm,GO:0005829~cytosol,GO:0030425~dendrite,GO:0045211~postsynaptic membrane,GO:0099572~postsynaptic specialization,GO:0099634~postsynaptic specialization membrane,	GO:0005524~ATP binding,GO:0046872~metal ion binding,GO:0061598~molybdopterin adenylyltransferase activity,GO:0061599~molybdopterin molybdotransferase activity,
LOC105432757	gephyrin-like(LOC105432757)	Pogonomyrmex barbatus	GO:0006777~Mo-molybdopterin cofactor biosynthetic process,GO:0007529~establishment of synaptic specificity at neuromuscular junction,GO:0018315~molybdenum incorporation into molybdenum-molybdopterin complex,GO:0072579~glycine receptor clustering,GO:0097112~gamma-aminobutyric acid receptor clustering,GO:0098970~postsynaptic neurotransmitter receptor diffusion trapping,	GO:0005737~cytoplasm,GO:0005829~cytosol,GO:0030425~dendrite,GO:0045211~postsynaptic membrane,GO:0099572~postsynaptic specialization,GO:0099634~postsynaptic specialization membrane,	GO:0005524~ATP binding,GO:0046872~metal ion binding,GO:0061598~molybdopterin adenylyltransferase activity,GO:0061599~molybdopterin molybdotransferase activity,	pbar00790:Folate biosynthesis,pbar01100:Metabolic pathways,pbar01240:Biosynthesis of cofactors,
LOC105433989	gephyrin-like(LOC105433989)	Pogonomyrmex barbatus	GO:0006777~Mo-molybdopterin cofactor biosynthetic process,GO:0007529~establishment of synaptic specificity at neuromuscular junction,GO:0018315~molybdenum incorporation into molybdenum-molybdopterin complex,GO:0072579~glycine receptor clustering,GO:0097112~gamma-aminobutyric acid receptor clustering,GO:0098970~postsynaptic neurotransmitter receptor diffusion trapping,	GO:0005737~cytoplasm,GO:0005829~cytosol,GO:0030425~dendrite,GO:0045211~postsynaptic membrane,GO:0099572~postsynaptic specialization,GO:0099634~postsynaptic specialization membrane,	GO:0005524~ATP binding,GO:0046872~metal ion binding,GO:0061598~molybdopterin adenylyltransferase activity,GO:0061599~molybdopterin molybdotransferase activity,	pbar00790:Folate biosynthesis,pbar01100:Metabolic pathways,pbar01240:Biosynthesis of cofactors,
LOC105434008	gephyrin-like(LOC105434008)	Pogonomyrmex barbatus	GO:0006777~Mo-molybdopterin cofactor biosynthetic process,GO:0007529~establishment of synaptic specificity at neuromuscular junction,GO:0018315~molybdenum incorporation into molybdenum-molybdopterin complex,GO:0072579~glycine receptor clustering,GO:0097112~gamma-aminobutyric acid receptor clustering,GO:0098970~postsynaptic neurotransmitter receptor diffusion trapping,	GO:0005737~cytoplasm,GO:0005829~cytosol,GO:0030425~dendrite,GO:0045211~postsynaptic membrane,GO:0099572~postsynaptic specialization,GO:0099634~postsynaptic specialization membrane,	GO:0005524~ATP binding,GO:0046872~metal ion binding,GO:0061598~molybdopterin adenylyltransferase activity,GO:0061599~molybdopterin molybdotransferase activity,	pbar00790:Folate biosynthesis,pbar01100:Metabolic pathways,pbar01240:Biosynthesis of cofactors,
LOC105433678	glucose dehydrogenase [FAD, quinone](LOC105433678)	Pogonomyrmex barbatus			GO:0016614~oxidoreductase activity, acting on CH-OH group of donors,GO:0050660~flavin adenine dinucleotide binding,
LOC105424300	glucose dehydrogenase [FAD, quinone]-like(LOC105424300)	Pogonomyrmex barbatus			GO:0016614~oxidoreductase activity, acting on CH-OH group of donors,GO:0050660~flavin adenine dinucleotide binding,
LOC105422866	glutamate decarboxylase(Gad1)	Pogonomyrmex barbatus	GO:0009449~gamma-aminobutyric acid biosynthetic process,GO:0019752~carboxylic acid metabolic process,	GO:0005737~cytoplasm,	GO:0004351~glutamate decarboxylase activity,GO:0016831~carboxy-lyase activity,GO:0030170~pyridoxal phosphate binding,	pbar00250:Alanine, aspartate and glutamate metabolism,pbar00410:beta-Alanine metabolism,pbar00430:Taurine and hypotaurine metabolism,pbar00650:Butanoate metabolism,pbar01100:Metabolic pathways,
LOC105427412	glutamate receptor ionotropic, delta-2-like(LOC105427412)	Pogonomyrmex barbatus	GO:0050906~detection of stimulus involved in sensory perception,	GO:0005886~plasma membrane,GO:0016020~membrane,	GO:0015276~ligand-gated monoatomic ion channel activity,	pbar04080:Neuroactive ligand-receptor interaction,
LOC105427373	glutamate receptor ionotropic, kainate 2-like(LOC105427373)	Pogonomyrmex barbatus	GO:0050906~detection of stimulus involved in sensory perception,	GO:0005886~plasma membrane,GO:0016020~membrane,	GO:0004970~glutamate-gated receptor activity,GO:0015276~ligand-gated monoatomic ion channel activity,
LOC105424723	glutamate receptor ionotropic, kainate 4-like(LOC105424723)	Pogonomyrmex barbatus		GO:0005886~plasma membrane,
LOC105427180	glutamine synthetase 2(Gs2)	Pogonomyrmex barbatus	GO:0006542~glutamine biosynthetic process,	GO:0005737~cytoplasm,	GO:0004356~glutamine synthetase activity,GO:0005524~ATP binding,	pbar00220:Arginine biosynthesis,pbar00250:Alanine, aspartate and glutamate metabolism,pbar00630:Glyoxylate and dicarboxylate metabolism,pbar00910:Nitrogen metabolism,pbar01100:Metabolic pathways,pbar01230:Biosynthesis of amino acids,
LOC105424992	glutamyl aminopeptidase-like(LOC105424992)	Pogonomyrmex barbatus	GO:0006508~proteolysis,GO:0043171~peptide catabolic process,	GO:0005615~extracellular space,GO:0005737~cytoplasm,GO:0005886~plasma membrane,GO:0098552~side of membrane,	GO:0008270~zinc ion binding,GO:0042277~peptide binding,GO:0070006~metalloaminopeptidase activity,
LOC105427263	glutamyl aminopeptidase-like(LOC105427263)	Pogonomyrmex barbatus	GO:0006508~proteolysis,GO:0043171~peptide catabolic process,	GO:0005615~extracellular space,GO:0005737~cytoplasm,GO:0005886~plasma membrane,GO:0098552~side of membrane,	GO:0008270~zinc ion binding,GO:0042277~peptide binding,GO:0070006~metalloaminopeptidase activity,	pbar00480:Glutathione metabolism,pbar01100:Metabolic pathways,
LOC105427265	glutamyl aminopeptidase-like(LOC105427265)	Pogonomyrmex barbatus	GO:0006508~proteolysis,GO:0043171~peptide catabolic process,	GO:0005615~extracellular space,GO:0005737~cytoplasm,GO:0005886~plasma membrane,GO:0098552~side of membrane,	GO:0008270~zinc ion binding,GO:0042277~peptide binding,GO:0070006~metalloaminopeptidase activity,
LOC105427424	glutamyl aminopeptidase-like(LOC105427424)	Pogonomyrmex barbatus	GO:0006508~proteolysis,GO:0043171~peptide catabolic process,	GO:0005615~extracellular space,GO:0005737~cytoplasm,GO:0005886~plasma membrane,GO:0098552~side of membrane,	GO:0008270~zinc ion binding,GO:0042277~peptide binding,GO:0070006~metalloaminopeptidase activity,
LOC105427427	glutathione S-transferase S1(GstS1)	Pogonomyrmex barbatus	GO:0006749~glutathione metabolic process,		GO:0004364~glutathione transferase activity,	pbar00480:Glutathione metabolism,pbar00590:Arachidonic acid metabolism,pbar00980:Metabolism of xenobiotics by cytochrome P450,pbar00982:Drug metabolism - cytochrome P450,pbar01100:Metabolic pathways,
LOC105422618	glutathione S-transferase theta-1-like(LOC105422618)	Pogonomyrmex barbatus	GO:0006749~glutathione metabolic process,	GO:0005737~cytoplasm,	GO:0004364~glutathione transferase activity,	pbar00480:Glutathione metabolism,pbar00980:Metabolism of xenobiotics by cytochrome P450,pbar00982:Drug metabolism - cytochrome P450,pbar00983:Drug metabolism - other enzymes,pbar01100:Metabolic pathways,
LOC105426680	glutathione hydrolase 1 proenzyme-like(LOC105426680)	Pogonomyrmex barbatus	GO:0006751~glutathione catabolic process,	GO:0005886~plasma membrane,	GO:0036374~glutathione hydrolase activity,	pbar00430:Taurine and hypotaurine metabolism,pbar00480:Glutathione metabolism,pbar00590:Arachidonic acid metabolism,pbar01100:Metabolic pathways,
LOC105428463	glycine dehydrogenase (decarboxylating), mitochondrial(LOC105428463)	Pogonomyrmex barbatus	GO:0019464~glycine decarboxylation via glycine cleavage system,	GO:0005739~mitochondrion,GO:0005960~glycine cleavage complex,	GO:0004375~glycine dehydrogenase (decarboxylating) activity,GO:0016594~glycine binding,GO:0030170~pyridoxal phosphate binding,	pbar00260:Glycine, serine and threonine metabolism,pbar00630:Glyoxylate and dicarboxylate metabolism,pbar00670:One carbon pool by folate,pbar00785:Lipoic acid metabolism,pbar01100:Metabolic pathways,pbar01200:Carbon metabolism,
LOC105425145	glycoprotein 3-alpha-L-fucosyltransferase A(FucTA)	Pogonomyrmex barbatus	GO:0006486~protein glycosylation,GO:0036065~fucosylation,	GO:0016020~membrane,GO:0032580~Golgi cisterna membrane,	GO:0008417~fucosyltransferase activity,GO:0046920~alpha-(1->3)-fucosyltransferase activity,	pbar00513:Various types of N-glycan biosynthesis,pbar01100:Metabolic pathways,
LOC105431892	glyoxylate reductase/hydroxypyruvate reductase(LOC105431892)	Pogonomyrmex barbatus		GO:0005829~cytosol,	GO:0008465~hydroxypyruvate reductase (NADH) activity,GO:0016618~hydroxypyruvate reductase [NAD(P)H] activity,GO:0030267~glyoxylate reductase (NADPH) activity,GO:0051287~NAD binding,	pbar00260:Glycine, serine and threonine metabolism,pbar00620:Pyruvate metabolism,pbar00630:Glyoxylate and dicarboxylate metabolism,pbar01100:Metabolic pathways,
LOC105427257	heat shock factor protein 2-like(LOC105427257)	Pogonomyrmex barbatus	GO:0006355~regulation of DNA-templated transcription,	GO:0005634~nucleus,	GO:0003700~DNA-binding transcription factor activity,GO:0043565~sequence-specific DNA binding,
LOC105422490	heat shock protein 83-like(LOC105422490)	Pogonomyrmex barbatus	GO:0006457~protein folding,GO:0034605~cellular response to heat,GO:0050821~protein stabilization,	GO:0005737~cytoplasm,GO:0005829~cytosol,GO:0005886~plasma membrane,GO:0032991~protein-containing complex,GO:0048471~perinuclear region of cytoplasm,	GO:0005524~ATP binding,GO:0016887~ATP hydrolysis activity,GO:0051082~unfolded protein binding,GO:0097718~disordered domain specific binding,GO:0140662~ATP-dependent protein folding chaperone,
LOC105431450	hemicentin-2-like(LOC105431450)	Pogonomyrmex barbatus	GO:0098609~cell-cell adhesion,	GO:0005886~plasma membrane,GO:0005911~cell-cell junction,	GO:0050839~cell adhesion molecule binding,
LOC105424964	histone H1.3-like(LOC105424964)	Pogonomyrmex barbatus	GO:0006334~nucleosome assembly,GO:0030261~chromosome condensation,GO:0045910~negative regulation of DNA recombination,	GO:0000786~nucleosome,GO:0005634~nucleus,	GO:0003690~double-stranded DNA binding,GO:0030527~structural constituent of chromatin,GO:0031492~nucleosomal DNA binding,
LOC105429525	histone H2A-like(LOC105429525)	Pogonomyrmex barbatus		GO:0000786~nucleosome,GO:0005634~nucleus,	GO:0003677~DNA binding,GO:0030527~structural constituent of chromatin,GO:0046982~protein heterodimerization activity,	pbar03082:ATP-dependent chromatin remodeling,
LOC105424220	histone H2B(LOC105424220)	Pogonomyrmex barbatus		GO:0000786~nucleosome,GO:0005634~nucleus,	GO:0003677~DNA binding,GO:0030527~structural constituent of chromatin,GO:0046982~protein heterodimerization activity,
LOC105433648	histone H2B-like(LOC105433648)	Pogonomyrmex barbatus		GO:0000786~nucleosome,	GO:0003677~DNA binding,GO:0030527~structural constituent of chromatin,GO:0046982~protein heterodimerization activity,
LOC105424224	histone H3(LOC105424224)	Pogonomyrmex barbatus		GO:0000786~nucleosome,GO:0005634~nucleus,	GO:0003677~DNA binding,GO:0030527~structural constituent of chromatin,GO:0046982~protein heterodimerization activity,
LOC105434150	histone H3-like centromeric protein hH3v(LOC105434150)	Pogonomyrmex barbatus		GO:0000786~nucleosome,	GO:0003677~DNA binding,GO:0030527~structural constituent of chromatin,GO:0046982~protein heterodimerization activity,
LOC105425178	histone demethylase UTY-like(LOC105425178)	Pogonomyrmex barbatus	GO:0010468~regulation of gene expression,	GO:0044666~MLL3/4 complex,	GO:0000978~RNA polymerase II cis-regulatory region sequence-specific DNA binding,GO:0031490~chromatin DNA binding,GO:0046872~metal ion binding,GO:0071558~histone H3K27me2/H3K27me3 demethylase activity,
LOC105431082	homeobox protein H2.0-like(LOC105431082)	Pogonomyrmex barbatus	GO:0006355~regulation of DNA-templated transcription,	GO:0005634~nucleus,	GO:0000981~DNA-binding transcription factor activity, RNA polymerase II-specific,GO:0043565~sequence-specific DNA binding,
LOC105422332	homeobox protein Meis2-like(LOC105422332)	Pogonomyrmex barbatus	GO:0001654~eye development,GO:0006355~regulation of DNA-templated transcription,GO:0006357~regulation of transcription by RNA polymerase II,GO:0009887~animal organ morphogenesis,GO:0048646~anatomical structure formation involved in morphogenesis,	GO:0005634~nucleus,	GO:0000978~RNA polymerase II cis-regulatory region sequence-specific DNA binding,GO:0000981~DNA-binding transcription factor activity, RNA polymerase II-specific,GO:0000987~cis-regulatory region sequence-specific DNA binding,	pbar04350:TGF-beta signaling pathway,
LOC105423235	homeobox protein Nkx-2.2a-like(LOC105423235)	Pogonomyrmex barbatus	GO:0006357~regulation of transcription by RNA polymerase II,GO:0030154~cell differentiation,	GO:0005634~nucleus,	GO:0000978~RNA polymerase II cis-regulatory region sequence-specific DNA binding,GO:0000981~DNA-binding transcription factor activity, RNA polymerase II-specific,
LOC105426937	homeobox protein Nkx-2.5-like(LOC105426937)	Pogonomyrmex barbatus	GO:0006357~regulation of transcription by RNA polymerase II,GO:0030154~cell differentiation,	GO:0005634~nucleus,	GO:0000978~RNA polymerase II cis-regulatory region sequence-specific DNA binding,GO:0000981~DNA-binding transcription factor activity, RNA polymerase II-specific,
LOC105422876	homeobox protein ceh-19-like(LOC105422876)	Pogonomyrmex barbatus	GO:0006355~regulation of DNA-templated transcription,GO:0007417~central nervous system development,GO:0007420~brain development,GO:0030182~neuron differentiation,	GO:0005634~nucleus,	GO:0000978~RNA polymerase II cis-regulatory region sequence-specific DNA binding,GO:0000981~DNA-binding transcription factor activity, RNA polymerase II-specific,GO:0003677~DNA binding,
LOC105422479	hyaluronan mediated motility receptor-like(LOC105422479)	Pogonomyrmex barbatus		GO:0005737~cytoplasm,GO:0005819~spindle,	GO:0005540~hyaluronic acid binding,
LOC105429800	hydrocephalus-inducing protein homolog(LOC105429800)	Pogonomyrmex barbatus	GO:0003341~cilium movement,GO:1904158~axonemal central apparatus assembly,	GO:0005930~axoneme,
LOC105422748	inositol monophosphatase 2-like(LOC105422748)	Pogonomyrmex barbatus	GO:0006020~inositol metabolic process,GO:0006021~inositol biosynthetic process,GO:0007165~signal transduction,GO:0046854~phosphatidylinositol phosphate biosynthetic process,		GO:0008934~inositol monophosphate 1-phosphatase activity,GO:0046872~metal ion binding,	pbar00562:Inositol phosphate metabolism,pbar01100:Metabolic pathways,pbar04070:Phosphatidylinositol signaling system,
LOC105423075	insulin-degrading enzyme-like(LOC105423075)	Pogonomyrmex barbatus	GO:0043171~peptide catabolic process,GO:0051603~proteolysis involved in protein catabolic process,	GO:0005739~mitochondrion,GO:0005829~cytosol,	GO:0004222~metalloendopeptidase activity,GO:0046872~metal ion binding,
LOC105424215	insulin-degrading enzyme-like(LOC105424215)	Pogonomyrmex barbatus	GO:0043171~peptide catabolic process,GO:0051603~proteolysis involved in protein catabolic process,	GO:0005739~mitochondrion,GO:0005829~cytosol,	GO:0004222~metalloendopeptidase activity,GO:0046872~metal ion binding,
LOC105424506	insulin-degrading enzyme-like(LOC105424506)	Pogonomyrmex barbatus			GO:0046872~metal ion binding,
LOC105425760	insulin-degrading enzyme-like(LOC105425760)	Pogonomyrmex barbatus	GO:0043171~peptide catabolic process,GO:0051603~proteolysis involved in protein catabolic process,	GO:0005739~mitochondrion,GO:0005829~cytosol,	GO:0004222~metalloendopeptidase activity,GO:0046872~metal ion binding,	pbar03266:Virion - Herpesvirus,
LOC105425776	insulin-degrading enzyme-like(LOC105425776)	Pogonomyrmex barbatus	GO:0043171~peptide catabolic process,GO:0051603~proteolysis involved in protein catabolic process,	GO:0005739~mitochondrion,GO:0005829~cytosol,	GO:0004222~metalloendopeptidase activity,GO:0046872~metal ion binding,
LOC105425798	insulin-degrading enzyme-like(LOC105425798)	Pogonomyrmex barbatus	GO:0043171~peptide catabolic process,GO:0051603~proteolysis involved in protein catabolic process,	GO:0005739~mitochondrion,GO:0005829~cytosol,	GO:0004222~metalloendopeptidase activity,GO:0046872~metal ion binding,	pbar03266:Virion - Herpesvirus,
LOC105427238	insulin-degrading enzyme-like(LOC105427238)	Pogonomyrmex barbatus	GO:0043171~peptide catabolic process,GO:0051603~proteolysis involved in protein catabolic process,	GO:0005739~mitochondrion,GO:0005829~cytosol,	GO:0004222~metalloendopeptidase activity,GO:0046872~metal ion binding,	pbar03266:Virion - Herpesvirus,
LOC105428242	insulin-degrading enzyme-like(LOC105428242)	Pogonomyrmex barbatus	GO:0043171~peptide catabolic process,GO:0051603~proteolysis involved in protein catabolic process,	GO:0005739~mitochondrion,GO:0005829~cytosol,	GO:0004222~metalloendopeptidase activity,GO:0046872~metal ion binding,
LOC112552705	insulin-degrading enzyme-like(LOC112552705)	Pogonomyrmex barbatus	GO:0043171~peptide catabolic process,GO:0051603~proteolysis involved in protein catabolic process,	GO:0005739~mitochondrion,GO:0005829~cytosol,	GO:0004222~metalloendopeptidase activity,GO:0046872~metal ion binding,
LOC105428286	insulin-like growth factor II-B(LOC105428286)	Pogonomyrmex barbatus	GO:0042104~positive regulation of activated T cell proliferation,GO:0043410~positive regulation of MAPK cascade,GO:0045944~positive regulation of transcription by RNA polymerase II,GO:0046628~positive regulation of insulin receptor signaling pathway,GO:0051147~regulation of muscle cell differentiation,GO:1905564~positive regulation of vascular endothelial cell proliferation,	GO:0005576~extracellular region,GO:0005615~extracellular space,	GO:0005159~insulin-like growth factor receptor binding,GO:0005179~hormone activity,GO:0008083~growth factor activity,GO:0043539~protein serine/threonine kinase activator activity,
LOC105432486	insulin-like growth factor-binding protein-related protein 1(LOC105432486)	Pogonomyrmex barbatus	GO:0001558~regulation of cell growth,GO:0009966~regulation of signal transduction,	GO:0005576~extracellular region,	GO:0005520~insulin-like growth factor binding,
LOC105429437	interaptin-like(LOC105429437)	Pogonomyrmex barbatus	GO:0051301~cell division,	GO:0000776~kinetochore,GO:0031262~Ndc80 complex,
LOC105426036	intraflagellar transport protein 81 homolog(LOC105426036)	Pogonomyrmex barbatus	GO:0042073~intraciliary transport,GO:0060271~cilium assembly,	GO:0005813~centrosome,GO:0005929~cilium,GO:0030992~intraciliary transport particle B,GO:0036064~ciliary basal body,	GO:0015631~tubulin binding,
LOC105430315	intraflagellar transport protein Oseg2(Oseg2)	Pogonomyrmex barbatus	GO:0042073~intraciliary transport,	GO:0005930~axoneme,GO:0030992~intraciliary transport particle B,GO:0036064~ciliary basal body,	GO:0005515~protein binding,
LOC105427124	isthmin-1-like(LOC105427124)	Pogonomyrmex barbatus		GO:0005576~extracellular region,
LOC105426604	jim lovell(lov)	Pogonomyrmex barbatus	GO:0006357~regulation of transcription by RNA polymerase II,	GO:0005634~nucleus,	GO:0003677~DNA binding,GO:0005515~protein binding,
LOC105434285	juvenile hormone acid methyltransferase(jhamt)	Pogonomyrmex barbatus			GO:0016740~transferase activity,	pbar00981:Insect hormone biosynthesis,
LOC105426908	juvenile hormone epoxide hydrolase 1-like(LOC105426908)	Pogonomyrmex barbatus	GO:0009056~catabolic process,GO:0097176~epoxide metabolic process,	GO:0016020~membrane,	GO:0004301~epoxide hydrolase activity,
LOC105432663	katanin p60 ATPase-containing subunit A-like 2(LOC105432663)	Pogonomyrmex barbatus			GO:0005515~protein binding,GO:0005524~ATP binding,GO:0016887~ATP hydrolysis activity,
LOC105431226	kinesin-like protein 3A(Klp3A)	Pogonomyrmex barbatus	GO:0007018~microtubule-based movement,GO:0007052~mitotic spindle organization,GO:0051231~spindle elongation,	GO:0005737~cytoplasm,GO:0005875~microtubule associated complex,	GO:0003777~microtubule motor activity,GO:0005524~ATP binding,GO:0008017~microtubule binding,	pbar04814:Motor proteins,
LOC105433510	kinesin-like protein KIF19(LOC105433510)	Pogonomyrmex barbatus	GO:0007018~microtubule-based movement,	GO:0005737~cytoplasm,GO:0005874~microtubule,	GO:0003777~microtubule motor activity,GO:0005524~ATP binding,GO:0008017~microtubule binding,
LOC105429185	kinesin-like protein KIF20A(LOC105429185)	Pogonomyrmex barbatus	GO:0007018~microtubule-based movement,GO:0051231~spindle elongation,GO:0090307~mitotic spindle assembly,	GO:0005634~nucleus,GO:0005737~cytoplasm,GO:0005876~spindle microtubule,GO:0072686~mitotic spindle,	GO:0005524~ATP binding,GO:0008017~microtubule binding,GO:0008574~plus-end-directed microtubule motor activity,	pbar04814:Motor proteins,
LOC105422612	kinesin-like protein KIF20B(LOC105422612)	Pogonomyrmex barbatus	GO:0007018~microtubule-based movement,GO:0051231~spindle elongation,GO:0090307~mitotic spindle assembly,	GO:0005737~cytoplasm,GO:0005876~spindle microtubule,GO:0072686~mitotic spindle,	GO:0005524~ATP binding,GO:0008017~microtubule binding,GO:0008574~plus-end-directed microtubule motor activity,	pbar04814:Motor proteins,
LOC105426123	kinesin-like protein KIF23(LOC105426123)	Pogonomyrmex barbatus	GO:0007018~microtubule-based movement,GO:0051231~spindle elongation,GO:0090307~mitotic spindle assembly,	GO:0005634~nucleus,GO:0005737~cytoplasm,GO:0005876~spindle microtubule,GO:0072686~mitotic spindle,	GO:0005524~ATP binding,GO:0008017~microtubule binding,GO:0008574~plus-end-directed microtubule motor activity,	pbar04814:Motor proteins,
LOC105423239	kinesin-like protein Klp61F(LOC105423239)	Pogonomyrmex barbatus	GO:0007018~microtubule-based movement,GO:0051231~spindle elongation,GO:0090307~mitotic spindle assembly,	GO:0005634~nucleus,GO:0005876~spindle microtubule,GO:0072686~mitotic spindle,	GO:0005524~ATP binding,GO:0008017~microtubule binding,GO:0008574~plus-end-directed microtubule motor activity,	pbar04814:Motor proteins,
LOC105424254	krueppel(Kr)	Pogonomyrmex barbatus	GO:0010468~regulation of gene expression,GO:0022008~neurogenesis,	GO:0005634~nucleus,
LOC105432294	laccase-1-like(LOC105432294)	Pogonomyrmex barbatus	GO:0006826~iron ion transport,	GO:0005886~plasma membrane,	GO:0005507~copper ion binding,GO:0016491~oxidoreductase activity,	pbar00053:Ascorbate and aldarate metabolism,pbar01100:Metabolic pathways,
LOC105430148	lactosylceramide 4-alpha-galactosyltransferase-like(LOC105430148)	Pogonomyrmex barbatus	GO:0006688~glycosphingolipid biosynthetic process,	GO:0000139~Golgi membrane,	GO:0016758~hexosyltransferase activity,GO:0035248~alpha-1,4-N-acetylgalactosaminyltransferase activity,	pbar00601:Glycosphingolipid biosynthesis - lacto and neolacto series,pbar00603:Glycosphingolipid biosynthesis - globo and isoglobo series,pbar01100:Metabolic pathways,
LOC105423089	large neutral amino acids transporter small subunit 1-like(LOC105423089)	Pogonomyrmex barbatus	GO:0003333~amino acid transmembrane transport,	GO:0016020~membrane,	GO:0015179~L-amino acid transmembrane transporter activity,
LOC105431979	larval-specific very high density lipoprotein(Vhdl)	Pogonomyrmex barbatus	GO:0006869~lipid transport,		GO:0005319~lipid transporter activity,
LOC105427694	lethal (2) 41Ab(l(2)41Ab)	Pogonomyrmex barbatus	GO:0035082~axoneme assembly,	GO:0005737~cytoplasm,
LOC105431258	lethal (3) malignant blood neoplasm(l(3)mbn)	Pogonomyrmex barbatus		GO:0016020~membrane,GO:0062129~chitin-based extracellular matrix,	GO:0008010~structural constituent of chitin-based larval cuticle,
LOC105426676	leucine-rich repeat-containing protein 40-like(LOC105426676)	Pogonomyrmex barbatus			GO:0005515~protein binding,
LOC105429181	leucine-rich repeat-containing protein 40-like(LOC105429181)	Pogonomyrmex barbatus		GO:0005737~cytoplasm,	GO:0005515~protein binding,
LOC105423370	leucyl-cystinyl aminopeptidase-like(LOC105423370)	Pogonomyrmex barbatus	GO:0006508~proteolysis,GO:0043171~peptide catabolic process,	GO:0005615~extracellular space,GO:0005737~cytoplasm,GO:0016020~membrane,	GO:0008270~zinc ion binding,GO:0042277~peptide binding,GO:0070006~metalloaminopeptidase activity,
LOC112552680	leucyl-cystinyl aminopeptidase-like(LOC112552680)	Pogonomyrmex barbatus	GO:0006508~proteolysis,GO:0043171~peptide catabolic process,	GO:0005615~extracellular space,GO:0005737~cytoplasm,GO:0016020~membrane,	GO:0008270~zinc ion binding,GO:0042277~peptide binding,GO:0070006~metalloaminopeptidase activity,
LOC105428205	leukotriene A-4 hydrolase-like(LOC105428205)	Pogonomyrmex barbatus	GO:0006508~proteolysis,GO:0043171~peptide catabolic process,	GO:0005829~cytosol,GO:0005886~plasma membrane,GO:0098552~side of membrane,	GO:0004177~aminopeptidase activity,GO:0004301~epoxide hydrolase activity,GO:0008237~metallopeptidase activity,GO:0008270~zinc ion binding,	pbar00590:Arachidonic acid metabolism,pbar01100:Metabolic pathways,
LOC105428215	leukotriene A-4 hydrolase-like(LOC105428215)	Pogonomyrmex barbatus	GO:0006508~proteolysis,	GO:0005829~cytosol,	GO:0016787~hydrolase activity,
LOC105433948	leukotriene A-4 hydrolase-like(LOC105433948)	Pogonomyrmex barbatus	GO:0006508~proteolysis,GO:0043171~peptide catabolic process,	GO:0005829~cytosol,	GO:0004177~aminopeptidase activity,GO:0004301~epoxide hydrolase activity,GO:0008237~metallopeptidase activity,GO:0008270~zinc ion binding,	pbar00590:Arachidonic acid metabolism,pbar01100:Metabolic pathways,
LOC112552700	leukotriene A-4 hydrolase-like(LOC112552700)	Pogonomyrmex barbatus	GO:0043171~peptide catabolic process,	GO:0005829~cytosol,	GO:0004177~aminopeptidase activity,GO:0004301~epoxide hydrolase activity,
LOC105427020	lipase 3-like(LOC105427020)	Pogonomyrmex barbatus	GO:0016042~lipid catabolic process,		GO:0016788~hydrolase activity, acting on ester bonds,	pbar00100:Steroid biosynthesis,pbar04142:Lysosome,pbar04148:Efferocytosis,
LOC105427021	lipase 3-like(LOC105427021)	Pogonomyrmex barbatus	GO:0006629~lipid metabolic process,GO:0016042~lipid catabolic process,		GO:0016788~hydrolase activity, acting on ester bonds,	pbar00100:Steroid biosynthesis,pbar04142:Lysosome,pbar04148:Efferocytosis,
LOC105434334	lipase 3-like(LOC105434334)	Pogonomyrmex barbatus	GO:0006629~lipid metabolic process,GO:0016042~lipid catabolic process,	GO:0016020~membrane,	GO:0016788~hydrolase activity, acting on ester bonds,
LOC105425373	lipase member H-A-like(LOC105425373)	Pogonomyrmex barbatus	GO:0006629~lipid metabolic process,GO:0016042~lipid catabolic process,	GO:0005615~extracellular space,	GO:0008970~phospholipase A1 activity,GO:0016298~lipase activity,GO:0017171~serine hydrolase activity,
LOC105433029	lipid droplet biogenesis associated protein seipin(Seipin)	Pogonomyrmex barbatus	GO:0006629~lipid metabolic process,GO:0019915~lipid storage,GO:0034389~lipid droplet organization,GO:0140042~lipid droplet formation,	GO:0005789~endoplasmic reticulum membrane,
LOC105422319	luciferin 4-monooxygenase-like(LOC105422319)	Pogonomyrmex barbatus	GO:0001676~long-chain fatty acid metabolic process,GO:0008218~bioluminescence,GO:0046949~fatty-acyl-CoA biosynthetic process,	GO:0005777~peroxisome,	GO:0004467~long-chain fatty acid-CoA ligase activity,GO:0004497~monooxygenase activity,GO:0016405~CoA-ligase activity,	pbar00130:Ubiquinone and other terpenoid-quinone biosynthesis,pbar01100:Metabolic pathways,
LOC105426786	luciferin 4-monooxygenase-like(LOC105426786)	Pogonomyrmex barbatus	GO:0001676~long-chain fatty acid metabolic process,GO:0046949~fatty-acyl-CoA biosynthetic process,	GO:0005777~peroxisome,	GO:0004467~long-chain fatty acid-CoA ligase activity,GO:0016405~CoA-ligase activity,	pbar00130:Ubiquinone and other terpenoid-quinone biosynthesis,pbar01100:Metabolic pathways,
LOC105430593	luciferin 4-monooxygenase-like(LOC105430593)	Pogonomyrmex barbatus	GO:0001676~long-chain fatty acid metabolic process,GO:0046949~fatty-acyl-CoA biosynthetic process,	GO:0005777~peroxisome,	GO:0004467~long-chain fatty acid-CoA ligase activity,GO:0016405~CoA-ligase activity,	pbar00130:Ubiquinone and other terpenoid-quinone biosynthesis,pbar01100:Metabolic pathways,
LOC105433758	lymphoid-specific helicase-like(LOC105433758)	Pogonomyrmex barbatus	GO:0006346~DNA methylation-dependent constitutive heterochromatin formation,GO:0031508~pericentric heterochromatin formation,GO:0044027~negative regulation of gene expression via chromosomal CpG island methylation,GO:0046651~lymphocyte proliferation,	GO:0005634~nucleus,GO:0005721~pericentric heterochromatin,	GO:0003682~chromatin binding,GO:0004386~helicase activity,GO:0005524~ATP binding,GO:0016787~hydrolase activity,GO:0140658~ATP-dependent chromatin remodeler activity,
LOC105426183	lymphokine-activated killer T-cell-originated protein kinase(LOC105426183)	Pogonomyrmex barbatus	GO:0006468~protein phosphorylation,	GO:0005737~cytoplasm,	GO:0004674~protein serine/threonine kinase activity,GO:0005524~ATP binding,
LOC105427608	lysosomal Pro-X carboxypeptidase(LOC105427608)	Pogonomyrmex barbatus	GO:0006508~proteolysis,		GO:0004180~carboxypeptidase activity,GO:0008239~dipeptidyl-peptidase activity,GO:0070008~serine-type exopeptidase activity,
LOC105427552	major facilitator superfamily domain-containing protein 12-like(LOC105427552)	Pogonomyrmex barbatus	GO:0008643~carbohydrate transport,	GO:0005886~plasma membrane,GO:0016020~membrane,	GO:0015293~symporter activity,
LOC105430001	major facilitator superfamily domain-containing protein 6-like(LOC105430001)	Pogonomyrmex barbatus		GO:0016020~membrane,	GO:0022857~transmembrane transporter activity,
LOC105432320	major facilitator superfamily domain-containing protein 6-like(LOC105432320)	Pogonomyrmex barbatus		GO:0016020~membrane,	GO:0022857~transmembrane transporter activity,
LOC105433980	male-specific lethal 3(msl-3)	Pogonomyrmex barbatus	GO:0006325~chromatin organization,GO:0006355~regulation of DNA-templated transcription,	GO:0005634~nucleus,GO:0035267~NuA4 histone acetyltransferase complex,GO:0072487~MSL complex,
LOC105424409	maternal embryonic leucine zipper kinase-like(LOC105424409)	Pogonomyrmex barbatus	GO:0000226~microtubule cytoskeleton organization,GO:0006468~protein phosphorylation,GO:0035556~intracellular signal transduction,	GO:0005737~cytoplasm,	GO:0004674~protein serine/threonine kinase activity,GO:0004676~3-phosphoinositide-dependent protein kinase activity,GO:0004677~DNA-dependent protein kinase activity,GO:0004679~AMP-activated protein kinase activity,GO:0004694~eukaryotic translation initiation factor 2alpha kinase activity,GO:0004711~ribosomal protein S6 kinase activity,GO:0005524~ATP binding,GO:0035175~histone H3S10 kinase activit…
LOC105422013	meckelin(LOC105422013)	Pogonomyrmex barbatus	GO:0060271~cilium assembly,	GO:0016020~membrane,GO:0035869~ciliary transition zone,GO:0036038~MKS complex,
LOC105430772	methylenetetrahydrofolate reductase(LOC105430772)	Pogonomyrmex barbatus	GO:0009086~methionine biosynthetic process,GO:0035999~tetrahydrofolate interconversion,	GO:0005829~cytosol,	GO:0004489~methylenetetrahydrofolate reductase (NAD(P)H) activity,GO:0071949~FAD binding,	pbar00670:One carbon pool by folate,pbar01100:Metabolic pathways,pbar04981:Folate transport and metabolism,
LOC105423753	mevalonate kinase-like(LOC105423753)	Pogonomyrmex barbatus	GO:0006695~cholesterol biosynthetic process,GO:0008299~isoprenoid biosynthetic process,GO:0019287~isopentenyl diphosphate biosynthetic process, mevalonate pathway,	GO:0005737~cytoplasm,GO:0005829~cytosol,	GO:0004496~mevalonate kinase activity,GO:0005524~ATP binding,	pbar00900:Terpenoid backbone biosynthesis,pbar01100:Metabolic pathways,pbar04146:Peroxisome,
LOC105428850	mevalonate kinase-like(LOC105428850)	Pogonomyrmex barbatus	GO:0008299~isoprenoid biosynthetic process,GO:0019287~isopentenyl diphosphate biosynthetic process, mevalonate pathway,	GO:0005737~cytoplasm,GO:0005829~cytosol,	GO:0004496~mevalonate kinase activity,GO:0005524~ATP binding,	pbar00900:Terpenoid backbone biosynthesis,pbar01100:Metabolic pathways,pbar04146:Peroxisome,
LOC105428852	mevalonate kinase-like(LOC105428852)	Pogonomyrmex barbatus	GO:0006695~cholesterol biosynthetic process,GO:0008299~isoprenoid biosynthetic process,GO:0019287~isopentenyl diphosphate biosynthetic process, mevalonate pathway,	GO:0005737~cytoplasm,GO:0005829~cytosol,	GO:0004496~mevalonate kinase activity,GO:0005524~ATP binding,	pbar00900:Terpenoid backbone biosynthesis,pbar01100:Metabolic pathways,pbar04146:Peroxisome,
LOC105428853	mevalonate kinase-like(LOC105428853)	Pogonomyrmex barbatus	GO:0006695~cholesterol biosynthetic process,GO:0008299~isoprenoid biosynthetic process,GO:0019287~isopentenyl diphosphate biosynthetic process, mevalonate pathway,	GO:0005737~cytoplasm,GO:0005829~cytosol,	GO:0004496~mevalonate kinase activity,GO:0005524~ATP binding,	pbar00900:Terpenoid backbone biosynthesis,pbar01100:Metabolic pathways,pbar04146:Peroxisome,
LOC105428977	mevalonate kinase-like(LOC105428977)	Pogonomyrmex barbatus	GO:0006695~cholesterol biosynthetic process,GO:0008299~isoprenoid biosynthetic process,GO:0019287~isopentenyl diphosphate biosynthetic process, mevalonate pathway,	GO:0005737~cytoplasm,GO:0005829~cytosol,	GO:0004496~mevalonate kinase activity,GO:0005524~ATP binding,	pbar00900:Terpenoid backbone biosynthesis,pbar01100:Metabolic pathways,pbar04146:Peroxisome,
LOC105430621	mevalonate kinase-like(LOC105430621)	Pogonomyrmex barbatus	GO:0006695~cholesterol biosynthetic process,GO:0008299~isoprenoid biosynthetic process,GO:0019287~isopentenyl diphosphate biosynthetic process, mevalonate pathway,	GO:0005737~cytoplasm,GO:0005829~cytosol,	GO:0004496~mevalonate kinase activity,GO:0005524~ATP binding,
LOC105430623	mevalonate kinase-like(LOC105430623)	Pogonomyrmex barbatus	GO:0006695~cholesterol biosynthetic process,GO:0008299~isoprenoid biosynthetic process,GO:0019287~isopentenyl diphosphate biosynthetic process, mevalonate pathway,	GO:0005737~cytoplasm,GO:0005829~cytosol,	GO:0004496~mevalonate kinase activity,GO:0005524~ATP binding,
LOC105430624	mevalonate kinase-like(LOC105430624)	Pogonomyrmex barbatus	GO:0006695~cholesterol biosynthetic process,GO:0008299~isoprenoid biosynthetic process,GO:0019287~isopentenyl diphosphate biosynthetic process, mevalonate pathway,	GO:0005737~cytoplasm,GO:0005829~cytosol,	GO:0004496~mevalonate kinase activity,GO:0005524~ATP binding,	pbar00900:Terpenoid backbone biosynthesis,pbar01100:Metabolic pathways,pbar04146:Peroxisome,
LOC105430625	mevalonate kinase-like(LOC105430625)	Pogonomyrmex barbatus	GO:0006695~cholesterol biosynthetic process,GO:0008299~isoprenoid biosynthetic process,GO:0019287~isopentenyl diphosphate biosynthetic process, mevalonate pathway,	GO:0005737~cytoplasm,GO:0005829~cytosol,	GO:0004496~mevalonate kinase activity,GO:0005524~ATP binding,	pbar00900:Terpenoid backbone biosynthesis,pbar01100:Metabolic pathways,pbar04146:Peroxisome,
LOC105430627	mevalonate kinase-like(LOC105430627)	Pogonomyrmex barbatus	GO:0006695~cholesterol biosynthetic process,GO:0008299~isoprenoid biosynthetic process,GO:0019287~isopentenyl diphosphate biosynthetic process, mevalonate pathway,	GO:0005737~cytoplasm,GO:0005829~cytosol,	GO:0004496~mevalonate kinase activity,GO:0005524~ATP binding,
LOC105430630	mevalonate kinase-like(LOC105430630)	Pogonomyrmex barbatus	GO:0006695~cholesterol biosynthetic process,GO:0008299~isoprenoid biosynthetic process,GO:0019287~isopentenyl diphosphate biosynthetic process, mevalonate pathway,	GO:0005737~cytoplasm,GO:0005829~cytosol,	GO:0004496~mevalonate kinase activity,GO:0005524~ATP binding,	pbar00900:Terpenoid backbone biosynthesis,pbar01100:Metabolic pathways,pbar04146:Peroxisome,
LOC105430631	mevalonate kinase-like(LOC105430631)	Pogonomyrmex barbatus	GO:0006695~cholesterol biosynthetic process,GO:0008299~isoprenoid biosynthetic process,GO:0019287~isopentenyl diphosphate biosynthetic process, mevalonate pathway,	GO:0005737~cytoplasm,GO:0005829~cytosol,	GO:0004496~mevalonate kinase activity,GO:0005524~ATP binding,	pbar00900:Terpenoid backbone biosynthesis,pbar01100:Metabolic pathways,pbar04146:Peroxisome,
LOC105430684	mevalonate kinase-like(LOC105430684)	Pogonomyrmex barbatus	GO:0006695~cholesterol biosynthetic process,GO:0008299~isoprenoid biosynthetic process,GO:0019287~isopentenyl diphosphate biosynthetic process, mevalonate pathway,	GO:0005737~cytoplasm,GO:0005829~cytosol,	GO:0004496~mevalonate kinase activity,GO:0005524~ATP binding,	pbar00900:Terpenoid backbone biosynthesis,pbar01100:Metabolic pathways,pbar04146:Peroxisome,
LOC105430686	mevalonate kinase-like(LOC105430686)	Pogonomyrmex barbatus	GO:0008299~isoprenoid biosynthetic process,GO:0019287~isopentenyl diphosphate biosynthetic process, mevalonate pathway,	GO:0005737~cytoplasm,GO:0005829~cytosol,	GO:0004496~mevalonate kinase activity,GO:0005524~ATP binding,	pbar00900:Terpenoid backbone biosynthesis,pbar01100:Metabolic pathways,pbar04146:Peroxisome,
LOC105430688	mevalonate kinase-like(LOC105430688)	Pogonomyrmex barbatus	GO:0008299~isoprenoid biosynthetic process,GO:0019287~isopentenyl diphosphate biosynthetic process, mevalonate pathway,	GO:0005737~cytoplasm,GO:0005829~cytosol,	GO:0004496~mevalonate kinase activity,GO:0005524~ATP binding,	pbar00900:Terpenoid backbone biosynthesis,pbar01100:Metabolic pathways,pbar04146:Peroxisome,
LOC105430689	mevalonate kinase-like(LOC105430689)	Pogonomyrmex barbatus	GO:0006695~cholesterol biosynthetic process,GO:0008299~isoprenoid biosynthetic process,GO:0019287~isopentenyl diphosphate biosynthetic process, mevalonate pathway,	GO:0005737~cytoplasm,GO:0005829~cytosol,GO:0016020~membrane,	GO:0004496~mevalonate kinase activity,GO:0005524~ATP binding,	pbar00900:Terpenoid backbone biosynthesis,pbar01100:Metabolic pathways,pbar04146:Peroxisome,
LOC105430691	mevalonate kinase-like(LOC105430691)	Pogonomyrmex barbatus	GO:0006695~cholesterol biosynthetic process,GO:0008299~isoprenoid biosynthetic process,GO:0019287~isopentenyl diphosphate biosynthetic process, mevalonate pathway,	GO:0005737~cytoplasm,GO:0005829~cytosol,	GO:0004496~mevalonate kinase activity,GO:0005524~ATP binding,
LOC105430692	mevalonate kinase-like(LOC105430692)	Pogonomyrmex barbatus	GO:0006695~cholesterol biosynthetic process,GO:0008299~isoprenoid biosynthetic process,GO:0019287~isopentenyl diphosphate biosynthetic process, mevalonate pathway,	GO:0005737~cytoplasm,GO:0005829~cytosol,	GO:0004496~mevalonate kinase activity,GO:0005524~ATP binding,	pbar00900:Terpenoid backbone biosynthesis,pbar01100:Metabolic pathways,pbar04146:Peroxisome,
LOC105431894	mevalonate kinase-like(LOC105431894)	Pogonomyrmex barbatus	GO:0006695~cholesterol biosynthetic process,GO:0008299~isoprenoid biosynthetic process,GO:0019287~isopentenyl diphosphate biosynthetic process, mevalonate pathway,	GO:0005737~cytoplasm,GO:0005829~cytosol,	GO:0004496~mevalonate kinase activity,GO:0005524~ATP binding,	pbar00900:Terpenoid backbone biosynthesis,pbar01100:Metabolic pathways,pbar04146:Peroxisome,
LOC105432258	mevalonate kinase-like(LOC105432258)	Pogonomyrmex barbatus	GO:0008299~isoprenoid biosynthetic process,GO:0019287~isopentenyl diphosphate biosynthetic process, mevalonate pathway,	GO:0005737~cytoplasm,GO:0005829~cytosol,	GO:0004496~mevalonate kinase activity,GO:0005524~ATP binding,	pbar00900:Terpenoid backbone biosynthesis,pbar01100:Metabolic pathways,pbar04146:Peroxisome,
LOC105432724	mevalonate kinase-like(LOC105432724)	Pogonomyrmex barbatus	GO:0006695~cholesterol biosynthetic process,GO:0008299~isoprenoid biosynthetic process,GO:0019287~isopentenyl diphosphate biosynthetic process, mevalonate pathway,	GO:0005737~cytoplasm,GO:0005829~cytosol,	GO:0004496~mevalonate kinase activity,GO:0005524~ATP binding,	pbar00900:Terpenoid backbone biosynthesis,pbar01100:Metabolic pathways,pbar04146:Peroxisome,
LOC105433100	mevalonate kinase-like(LOC105433100)	Pogonomyrmex barbatus	GO:0006695~cholesterol biosynthetic process,GO:0008299~isoprenoid biosynthetic process,GO:0019287~isopentenyl diphosphate biosynthetic process, mevalonate pathway,	GO:0005737~cytoplasm,GO:0005829~cytosol,	GO:0004496~mevalonate kinase activity,GO:0005524~ATP binding,	pbar00900:Terpenoid backbone biosynthesis,pbar01100:Metabolic pathways,pbar04146:Peroxisome,
LOC112552880	mevalonate kinase-like(LOC112552880)	Pogonomyrmex barbatus	GO:0006695~cholesterol biosynthetic process,GO:0008299~isoprenoid biosynthetic process,GO:0019287~isopentenyl diphosphate biosynthetic process, mevalonate pathway,	GO:0005737~cytoplasm,GO:0005829~cytosol,	GO:0004496~mevalonate kinase activity,GO:0005524~ATP binding,
LOC105425756	mind the gap(mtg)	Pogonomyrmex barbatus		GO:0005576~extracellular region,	GO:0008061~chitin binding,
LOC105429044	mitochondrial enolase superfamily member 1-like(LOC105429044)	Pogonomyrmex barbatus	GO:0016052~carbohydrate catabolic process,		GO:0000287~magnesium ion binding,GO:0016836~hydro-lyase activity,	pbar00051:Fructose and mannose metabolism,pbar01100:Metabolic pathways,
LOC105429045	mitochondrial enolase superfamily member 1-like(LOC105429045)	Pogonomyrmex barbatus	GO:0009063~amino acid catabolic process,GO:0016052~carbohydrate catabolic process,		GO:0000287~magnesium ion binding,GO:0050023~L-fuconate dehydratase activity,	pbar00051:Fructose and mannose metabolism,pbar01100:Metabolic pathways,
LOC105424526	mitochondrial ribosomal protein L18(mRpL18)	Pogonomyrmex barbatus	GO:0006412~translation,	GO:0005739~mitochondrion,GO:0005840~ribosome,GO:1990904~ribonucleoprotein complex,	GO:0003735~structural constituent of ribosome,GO:0008097~5S rRNA binding,	pbar03010:Ribosome,
LOC105425232	mitotic arrest deficient 2(mad2)	Pogonomyrmex barbatus	GO:0007094~mitotic spindle assembly checkpoint signaling,GO:0051301~cell division,	GO:0000776~kinetochore,GO:0005654~nucleoplasm,GO:0005737~cytoplasm,
LOC105432625	modular serine protease-like(LOC105432625)	Pogonomyrmex barbatus	GO:0006508~proteolysis,		GO:0004252~serine-type endopeptidase activity,
LOC105428429	monocarboxylate transporter 3-like(LOC105428429)	Pogonomyrmex barbatus	GO:0015718~monocarboxylic acid transport,GO:0055085~transmembrane transport,	GO:0016020~membrane,	GO:0008028~monocarboxylic acid transmembrane transporter activity,
LOC105424201	multiple C2 domain and transmembrane region protein(Mctp)	Pogonomyrmex barbatus	GO:0046928~regulation of neurotransmitter secretion,	GO:0030672~synaptic vesicle membrane,	GO:0005509~calcium ion binding,
LOC105426861	murinoglobulin-1-like(LOC105426861)	Pogonomyrmex barbatus		GO:0005576~extracellular region,GO:0005615~extracellular space,	GO:0004866~endopeptidase inhibitor activity,GO:0004867~serine-type endopeptidase inhibitor activity,
LOC105426578	myosin-VIIa ck(ck)	Pogonomyrmex barbatus	GO:0009887~animal organ morphogenesis,GO:0030182~neuron differentiation,	GO:0005737~cytoplasm,GO:0005856~cytoskeleton,GO:0016459~myosin complex,GO:0071944~cell periphery,GO:0120025~plasma membrane bounded cell projection,	GO:0003774~cytoskeletal motor activity,GO:0003779~actin binding,GO:0005515~protein binding,GO:0005524~ATP binding,	pbar04814:Motor proteins,
LOC105423677	myosin-VIIa-like(LOC105423677)	Pogonomyrmex barbatus	GO:0007015~actin filament organization,GO:0007423~sensory organ development,GO:0007605~sensory perception of sound,GO:0030050~vesicle transport along actin filament,	GO:0005737~cytoplasm,GO:0005902~microvillus,GO:0015629~actin cytoskeleton,GO:0016459~myosin complex,GO:0031982~vesicle,	GO:0000146~microfilament motor activity,GO:0003774~cytoskeletal motor activity,GO:0003779~actin binding,GO:0005524~ATP binding,GO:0051015~actin filament binding,
LOC105429365	nessun dorma(nesd)	Pogonomyrmex barbatus	GO:0007112~male meiosis cytokinesis,GO:0007283~spermatogenesis,	GO:0005737~cytoplasm,GO:0005819~spindle,
LOC105427653	netrin receptor UNC5C-like(LOC105427653)	Pogonomyrmex barbatus	GO:0008045~motor neuron axon guidance,GO:0038007~netrin-activated signaling pathway,	GO:0005886~plasma membrane,GO:0016020~membrane,	GO:0005042~netrin receptor activity,GO:0005515~protein binding,
LOC105421957	neuropeptides capa receptor-like(LOC105421957)	Pogonomyrmex barbatus	GO:0007218~neuropeptide signaling pathway,	GO:0005886~plasma membrane,	GO:0001607~neuromedin U receptor activity,	pbar04080:Neuroactive ligand-receptor interaction,
LOC105428276	neutral ceramidase(CDase)	Pogonomyrmex barbatus	GO:0042759~long-chain fatty acid biosynthetic process,GO:0046512~sphingosine biosynthetic process,GO:0046514~ceramide catabolic process,	GO:0005576~extracellular region,GO:0016020~membrane,	GO:0017040~N-acylsphingosine amidohydrolase activity,
LOC105422665	neutral ceramidase-like(LOC105422665)	Pogonomyrmex barbatus	GO:0042759~long-chain fatty acid biosynthetic process,GO:0046512~sphingosine biosynthetic process,GO:0046514~ceramide catabolic process,	GO:0005576~extracellular region,GO:0016020~membrane,	GO:0017040~N-acylsphingosine amidohydrolase activity,
LOC105428275	neutral ceramidase-like(LOC105428275)	Pogonomyrmex barbatus	GO:0042759~long-chain fatty acid biosynthetic process,GO:0046512~sphingosine biosynthetic process,GO:0046514~ceramide catabolic process,	GO:0005576~extracellular region,GO:0016020~membrane,	GO:0017040~N-acylsphingosine amidohydrolase activity,
LOC105433819	neutral ceramidase-like(LOC105433819)	Pogonomyrmex barbatus	GO:0042759~long-chain fatty acid biosynthetic process,GO:0046512~sphingosine biosynthetic process,GO:0046514~ceramide catabolic process,	GO:0005576~extracellular region,GO:0016020~membrane,	GO:0017040~N-acylsphingosine amidohydrolase activity,
LOC105433791	nicotinamidase-like(LOC105433791)	Pogonomyrmex barbatus	GO:0019363~pyridine nucleotide biosynthetic process,		GO:0005509~calcium ion binding,GO:0016787~hydrolase activity,
LOC105427624	no poles(nopo)	Pogonomyrmex barbatus	GO:0016567~protein ubiquitination,GO:0031297~replication fork processing,	GO:0005634~nucleus,GO:0090734~site of DNA damage,	GO:0008270~zinc ion binding,GO:0061630~ubiquitin protein ligase activity,
LOC105434333	non-canonical poly(A) RNA polymerase PAPD5-like(LOC105434333)	Pogonomyrmex barbatus	GO:0031123~RNA 3'-end processing,GO:0043634~polyadenylation-dependent ncRNA catabolic process,	GO:0005730~nucleolus,GO:0031499~TRAMP complex,	GO:0003729~mRNA binding,GO:0046872~metal ion binding,GO:1990817~poly(A) RNA polymerase activity,	pbar03018:RNA degradation,
LOC105424327	nose resistant to fluoxetine protein 6(LOC105424327)	Pogonomyrmex barbatus		GO:0016020~membrane,	GO:0016747~acyltransferase activity, transferring groups other than amino-acyl groups,
LOC105422613	nuclear pore complex protein Nup88(mbo)	Pogonomyrmex barbatus	GO:0000055~ribosomal large subunit export from nucleus,GO:0000056~ribosomal small subunit export from nucleus,GO:0006406~mRNA export from nucleus,GO:0006606~protein import into nucleus,	GO:0005643~nuclear pore,	GO:0017056~structural constituent of nuclear pore,	pbar03013:Nucleocytoplasmic transport,
LOC105428138	nucleoporin NUP35(LOC105428138)	Pogonomyrmex barbatus	GO:0006355~regulation of DNA-templated transcription,GO:0006607~NLS-bearing protein import into nucleus,GO:0006999~nuclear pore organization,GO:0051028~mRNA transport,	GO:0031965~nuclear membrane,GO:0044613~nuclear pore central transport channel,GO:0044615~nuclear pore nuclear basket,	GO:0003676~nucleic acid binding,GO:0003697~single-stranded DNA binding,GO:0005543~phospholipid binding,GO:0017056~structural constituent of nuclear pore,	pbar03013:Nucleocytoplasmic transport,
LOC105425470	nucleoredoxin-like(LOC105425470)	Pogonomyrmex barbatus	GO:0030178~negative regulation of Wnt signaling pathway,GO:0031397~negative regulation of protein ubiquitination,	GO:0005634~nucleus,	GO:0004791~thioredoxin-disulfide reductase (NADPH) activity,
LOC105431076	octopamine receptor beta-2R-like(LOC105431076)	Pogonomyrmex barbatus	GO:0043410~positive regulation of MAPK cascade,GO:0071880~adenylate cyclase-activating adrenergic receptor signaling pathway,	GO:0005886~plasma membrane,GO:0016020~membrane,	GO:0004989~octopamine receptor activity,
LOC105422442	odd skipped(odd)	Pogonomyrmex barbatus	GO:0006357~regulation of transcription by RNA polymerase II,GO:0009790~embryo development,GO:0009880~embryonic pattern specification,GO:0009887~animal organ morphogenesis,GO:0048619~embryonic hindgut morphogenesis,	GO:0005634~nucleus,	GO:0000977~RNA polymerase II transcription regulatory region sequence-specific DNA binding,GO:0000981~DNA-binding transcription factor activity, RNA polymerase II-specific,GO:0046872~metal ion binding,
LOC105427547	odorant binding protein 1(Obp1)	Pogonomyrmex barbatus	GO:0007608~sensory perception of smell,	GO:0005615~extracellular space,	GO:0005549~odorant binding,
LOC105424024	odorant receptor 13a-like(LOC105424024)	Pogonomyrmex barbatus	GO:0007165~signal transduction,GO:0007608~sensory perception of smell,GO:0050911~detection of chemical stimulus involved in sensory perception of smell,	GO:0005886~plasma membrane,	GO:0004984~olfactory receptor activity,GO:0005549~odorant binding,
LOC105427500	odorant receptor 13a-like(LOC105427500)	Pogonomyrmex barbatus	GO:0007165~signal transduction,GO:0007608~sensory perception of smell,GO:0050911~detection of chemical stimulus involved in sensory perception of smell,	GO:0005886~plasma membrane,	GO:0004984~olfactory receptor activity,GO:0005549~odorant binding,
LOC105431363	odorant receptor 13a-like(LOC105431363)	Pogonomyrmex barbatus	GO:0007165~signal transduction,GO:0007608~sensory perception of smell,GO:0050911~detection of chemical stimulus involved in sensory perception of smell,	GO:0005886~plasma membrane,	GO:0004984~olfactory receptor activity,GO:0005549~odorant binding,
LOC112552656	odorant receptor 13a-like(LOC112552656)	Pogonomyrmex barbatus	GO:0007165~signal transduction,GO:0007608~sensory perception of smell,GO:0050911~detection of chemical stimulus involved in sensory perception of smell,	GO:0005886~plasma membrane,	GO:0004984~olfactory receptor activity,GO:0005549~odorant binding,
LOC105423510	odorant receptor 4-like(LOC105423510)	Pogonomyrmex barbatus	GO:0007165~signal transduction,GO:0007608~sensory perception of smell,GO:0050911~detection of chemical stimulus involved in sensory perception of smell,	GO:0005886~plasma membrane,	GO:0004984~olfactory receptor activity,GO:0005549~odorant binding,
LOC105430371	odorant receptor 4-like(LOC105430371)	Pogonomyrmex barbatus	GO:0007165~signal transduction,GO:0007608~sensory perception of smell,GO:0050911~detection of chemical stimulus involved in sensory perception of smell,	GO:0005886~plasma membrane,	GO:0004984~olfactory receptor activity,GO:0005549~odorant binding,
LOC112552732	odorant receptor 43a-like(LOC112552732)	Pogonomyrmex barbatus	GO:0007165~signal transduction,GO:0007608~sensory perception of smell,	GO:0016020~membrane,	GO:0004984~olfactory receptor activity,GO:0005549~odorant binding,
LOC112552659	odorant receptor 49b-like(LOC112552659)	Pogonomyrmex barbatus	GO:0007165~signal transduction,GO:0007608~sensory perception of smell,GO:0050911~detection of chemical stimulus involved in sensory perception of smell,	GO:0005886~plasma membrane,	GO:0004984~olfactory receptor activity,GO:0005549~odorant binding,
LOC105429552	odorant receptor 63a-like(LOC105429552)	Pogonomyrmex barbatus	GO:0007165~signal transduction,GO:0007608~sensory perception of smell,GO:0050911~detection of chemical stimulus involved in sensory perception of smell,	GO:0005886~plasma membrane,	GO:0004984~olfactory receptor activity,GO:0005549~odorant binding,
LOC105432120	odorant receptor 63a-like(LOC105432120)	Pogonomyrmex barbatus	GO:0007165~signal transduction,GO:0007608~sensory perception of smell,GO:0050911~detection of chemical stimulus involved in sensory perception of smell,	GO:0005886~plasma membrane,	GO:0004984~olfactory receptor activity,GO:0005549~odorant binding,
LOC105426406	odorant receptor 9a-like(LOC105426406)	Pogonomyrmex barbatus	GO:0007165~signal transduction,GO:0007608~sensory perception of smell,GO:0050911~detection of chemical stimulus involved in sensory perception of smell,	GO:0005886~plasma membrane,	GO:0004984~olfactory receptor activity,GO:0005549~odorant binding,
LOC105431364	odorant receptor 9a-like(LOC105431364)	Pogonomyrmex barbatus	GO:0007165~signal transduction,GO:0007608~sensory perception of smell,GO:0050911~detection of chemical stimulus involved in sensory perception of smell,	GO:0005886~plasma membrane,	GO:0004984~olfactory receptor activity,GO:0005549~odorant binding,
LOC105427503	odorant receptor Or2-like(LOC105427503)	Pogonomyrmex barbatus	GO:0007165~signal transduction,GO:0007608~sensory perception of smell,GO:0050911~detection of chemical stimulus involved in sensory perception of smell,	GO:0005886~plasma membrane,	GO:0004984~olfactory receptor activity,GO:0005549~odorant binding,
LOC105428557	odorant receptor Or2-like(LOC105428557)	Pogonomyrmex barbatus	GO:0007165~signal transduction,GO:0007608~sensory perception of smell,GO:0050911~detection of chemical stimulus involved in sensory perception of smell,	GO:0005886~plasma membrane,	GO:0004984~olfactory receptor activity,GO:0005549~odorant binding,
LOC105429490	odorant receptor Or2-like(LOC105429490)	Pogonomyrmex barbatus	GO:0007165~signal transduction,GO:0007608~sensory perception of smell,GO:0050911~detection of chemical stimulus involved in sensory perception of smell,	GO:0005886~plasma membrane,	GO:0004984~olfactory receptor activity,GO:0005549~odorant binding,
LOC105423281	ornithine decarboxylase 1-like(LOC105423281)	Pogonomyrmex barbatus	GO:0033387~putrescine biosynthetic process from arginine, via ornithine,	GO:0005737~cytoplasm,	GO:0004586~ornithine decarboxylase activity,	pbar00330:Arginine and proline metabolism,pbar00480:Glutathione metabolism,pbar01100:Metabolic pathways,pbar04148:Efferocytosis,
LOC105423943	osmotic avoidance abnormal protein 3-like(LOC105423943)	Pogonomyrmex barbatus	GO:0007018~microtubule-based movement,	GO:0005737~cytoplasm,GO:0005874~microtubule,	GO:0003777~microtubule motor activity,GO:0005524~ATP binding,GO:0008017~microtubule binding,	pbar04814:Motor proteins,
LOC105431449	pachytene checkpoint 2 protein(pch2)	Pogonomyrmex barbatus	GO:0007131~reciprocal meiotic recombination,GO:0051598~meiotic recombination checkpoint signaling,	GO:0005634~nucleus,GO:0005694~chromosome,	GO:0005524~ATP binding,GO:0016887~ATP hydrolysis activity,
LOC105433559	pair-rule protein odd-paired(LOC105433559)	Pogonomyrmex barbatus	GO:0006357~regulation of transcription by RNA polymerase II,GO:0007417~central nervous system development,	GO:0005634~nucleus,	GO:0000978~RNA polymerase II cis-regulatory region sequence-specific DNA binding,GO:0000981~DNA-binding transcription factor activity, RNA polymerase II-specific,
LOC105429025	pancreatic triacylglycerol lipase-like(LOC105429025)	Pogonomyrmex barbatus	GO:0016042~lipid catabolic process,	GO:0005615~extracellular space,	GO:0008970~phospholipase A1 activity,GO:0016298~lipase activity,GO:0017171~serine hydrolase activity,
LOC105425578	pantothenate kinase 4(LOC105425578)	Pogonomyrmex barbatus	GO:0015937~coenzyme A biosynthetic process,	GO:0005634~nucleus,GO:0005829~cytosol,	GO:0004594~pantothenate kinase activity,GO:0005524~ATP binding,
LOC105433804	peroxidase-like(LOC105433804)	Pogonomyrmex barbatus	GO:0006979~response to oxidative stress,		GO:0004601~peroxidase activity,GO:0020037~heme binding,GO:0046872~metal ion binding,
LOC105432446	peroxidasin homolog(LOC105432446)	Pogonomyrmex barbatus	GO:0006979~response to oxidative stress,	GO:0016020~membrane,	GO:0004601~peroxidase activity,GO:0020037~heme binding,GO:0046872~metal ion binding,
LOC105427012	phospholipase A1-like(LOC105427012)	Pogonomyrmex barbatus	GO:0016042~lipid catabolic process,	GO:0005615~extracellular space,	GO:0008970~phospholipase A1 activity,GO:0016298~lipase activity,GO:0017171~serine hydrolase activity,
LOC105431902	phosphoribosyl pyrophosphate synthase-associated protein 2(LOC105431902)	Pogonomyrmex barbatus	GO:0006015~5-phosphoribose 1-diphosphate biosynthetic process,GO:0006164~purine nucleotide biosynthetic process,	GO:0002189~ribose phosphate diphosphokinase complex,GO:0005737~cytoplasm,	GO:0000287~magnesium ion binding,GO:0004749~ribose phosphate diphosphokinase activity,GO:0005524~ATP binding,
LOC105426187	phosphotriesterase-related protein(LOC105426187)	Pogonomyrmex barbatus	GO:0009056~catabolic process,		GO:0008270~zinc ion binding,GO:0016788~hydrolase activity, acting on ester bonds,
LOC105432952	pituitary homeobox homolog Ptx1(LOC105432952)	Pogonomyrmex barbatus	GO:0006357~regulation of transcription by RNA polymerase II,GO:0030154~cell differentiation,	GO:0005634~nucleus,	GO:0000978~RNA polymerase II cis-regulatory region sequence-specific DNA binding,GO:0000981~DNA-binding transcription factor activity, RNA polymerase II-specific,
LOC105427119	plectin-like(LOC105427119)	Pogonomyrmex barbatus			GO:0005515~protein binding,
LOC105427631	pollen-specific leucine-rich repeat extensin-like protein 2(LOC105427631)	Pogonomyrmex barbatus	GO:0040003~chitin-based cuticle development,	GO:0062129~chitin-based extracellular matrix,	GO:0008010~structural constituent of chitin-based larval cuticle,
LOC105429457	popeye domain-containing protein 3-like(LOC105429457)	Pogonomyrmex barbatus	GO:0007507~heart development,GO:0042391~regulation of membrane potential,GO:0051146~striated muscle cell differentiation,	GO:0042383~sarcolemma,	GO:0030552~cAMP binding,
LOC105423559	probable DNA double-strand break repair Rad50 ATPase(LOC105423559)	Pogonomyrmex barbatus	GO:0006869~lipid transport,GO:0042157~lipoprotein metabolic process,	GO:0005576~extracellular region,	GO:0008289~lipid binding,
LOC105425390	probable G-protein coupled receptor Mth-like 3(LOC105425390)	Pogonomyrmex barbatus	GO:0007166~cell surface receptor signaling pathway,GO:0007186~G protein-coupled receptor signaling pathway,	GO:0005886~plasma membrane,GO:0016020~membrane,	GO:0004930~G protein-coupled receptor activity,GO:0008528~G protein-coupled peptide receptor activity,
LOC105429937	probable RNA-binding protein 46(LOC105429937)	Pogonomyrmex barbatus		GO:0005634~nucleus,	GO:0003723~RNA binding,GO:0003729~mRNA binding,
LOC105431920	probable allantoicase(LOC105431920)	Pogonomyrmex barbatus	GO:0000256~allantoin catabolic process,		GO:0004037~allantoicase activity,	pbar00230:Purine metabolism,pbar01100:Metabolic pathways,
LOC105431083	probable cytochrome P450 12a5, mitochondrial(LOC105431083)	Pogonomyrmex barbatus			GO:0004497~monooxygenase activity,GO:0005506~iron ion binding,GO:0016705~oxidoreductase activity, acting on paired donors, with incorporation or reduction of molecular oxygen,GO:0020037~heme binding,
LOC105428655	probable cytochrome P450 12b2, mitochondrial(LOC105428655)	Pogonomyrmex barbatus		GO:0005789~endoplasmic reticulum membrane,	GO:0004497~monooxygenase activity,GO:0005506~iron ion binding,GO:0016705~oxidoreductase activity, acting on paired donors, with incorporation or reduction of molecular oxygen,GO:0020037~heme binding,
LOC105432893	probable cytochrome P450 305a1(LOC105432893)	Pogonomyrmex barbatus	GO:0006082~organic acid metabolic process,GO:0006805~xenobiotic metabolic process,	GO:0005737~cytoplasm,GO:0043231~intracellular membrane-bounded organelle,	GO:0005506~iron ion binding,GO:0008395~steroid hydroxylase activity,GO:0016712~oxidoreductase activity, acting on paired donors, with incorporation or reduction of molecular oxygen, reduced flavin or flavoprotein as one donor, and incorporation of one atom of oxygen,GO:0020037~heme binding,
LOC105434090	probable cytochrome P450 49a1(LOC105434090)	Pogonomyrmex barbatus			GO:0004497~monooxygenase activity,GO:0005506~iron ion binding,GO:0016705~oxidoreductase activity, acting on paired donors, with incorporation or reduction of molecular oxygen,GO:0020037~heme binding,
LOC105428101	probable cytochrome P450 6a14(LOC105428101)	Pogonomyrmex barbatus		GO:0005789~endoplasmic reticulum membrane,	GO:0004497~monooxygenase activity,GO:0005506~iron ion binding,GO:0016705~oxidoreductase activity, acting on paired donors, with incorporation or reduction of molecular oxygen,GO:0020037~heme binding,
LOC105431384	probable low-specificity L-threonine aldolase 2(LOC105431384)	Pogonomyrmex barbatus	GO:0006545~glycine biosynthetic process,GO:0006567~threonine catabolic process,	GO:0005829~cytosol,	GO:0008732~L-allo-threonine aldolase activity,	pbar00260:Glycine, serine and threonine metabolism,pbar01100:Metabolic pathways,pbar01230:Biosynthesis of amino acids,
LOC105426614	probable methyltransferase TARBP1(LOC105426614)	Pogonomyrmex barbatus	GO:0030488~tRNA methylation,		GO:0003723~RNA binding,GO:0016423~tRNA (guanine) methyltransferase activity,
LOC105429820	probable phospholipid-transporting ATPase IF(LOC105429820)	Pogonomyrmex barbatus	GO:0045332~phospholipid translocation,	GO:0005783~endoplasmic reticulum,GO:0005802~trans-Golgi network,GO:0005886~plasma membrane,	GO:0000287~magnesium ion binding,GO:0005524~ATP binding,GO:0016887~ATP hydrolysis activity,GO:0140326~ATPase-coupled intramembrane lipid transporter activity,	pbar04148:Efferocytosis,
LOC105424462	probable serine/threonine-protein kinase DDB_G0271682(LOC105424462)	Pogonomyrmex barbatus	GO:0006468~protein phosphorylation,GO:0007094~mitotic spindle assembly checkpoint signaling,GO:0007140~male meiotic nuclear division,GO:0008608~attachment of spindle microtubules to kinetochore,GO:0043063~intercellular bridge organization,GO:0051306~mitotic sister chromatid separation,	GO:0000776~kinetochore,GO:0030496~midbody,GO:0045171~intercellular bridge,	GO:0004672~protein kinase activity,GO:0005524~ATP binding,
LOC105422553	probable serine/threonine-protein kinase ifkC(LOC105422553)	Pogonomyrmex barbatus	GO:0006468~protein phosphorylation,GO:0017148~negative regulation of translation,	GO:0005634~nucleus,GO:0005737~cytoplasm,	GO:0003743~translation initiation factor activity,GO:0004672~protein kinase activity,GO:0004694~eukaryotic translation initiation factor 2alpha kinase activity,GO:0005524~ATP binding,
LOC105431618	probable tubulin polyglutamylase TTLL9(LOC105431618)	Pogonomyrmex barbatus	GO:0000226~microtubule cytoskeleton organization,GO:0018095~protein polyglutamylation,GO:0036211~protein modification process,	GO:0005929~cilium,GO:0036064~ciliary basal body,	GO:0005524~ATP binding,GO:0015631~tubulin binding,GO:0046872~metal ion binding,GO:0070740~tubulin-glutamic acid ligase activity,
LOC105428383	probable uridine nucleosidase 2(LOC105428383)	Pogonomyrmex barbatus	GO:0006139~nucleobase-containing compound metabolic process,		GO:0016799~hydrolase activity, hydrolyzing N-glycosyl compounds,
LOC105425302	progestin and adipoQ receptor family member 3(LOC105425302)	Pogonomyrmex barbatus		GO:0016020~membrane,	GO:0038023~signaling receptor activity,GO:0046872~metal ion binding,
LOC105425553	prostatic acid phosphatase-like(LOC105425553)	Pogonomyrmex barbatus	GO:0016311~dephosphorylation,		GO:0016791~phosphatase activity,
LOC105424831	protein FAM192A(LOC105424831)	Pogonomyrmex barbatus		GO:0005634~nucleus,
LOC105430911	protein FAM49B(LOC105430911)	Pogonomyrmex barbatus	GO:0030833~regulation of actin filament polymerization,	GO:0016020~membrane,	GO:0031267~small GTPase binding,
LOC105433024	protein SAAL1(LOC105433024)	Pogonomyrmex barbatus		GO:0005615~extracellular space,GO:0005654~nucleoplasm,
LOC105434166	protein apterous-like(LOC105434166)	Pogonomyrmex barbatus	GO:0006357~regulation of transcription by RNA polymerase II,GO:0030182~neuron differentiation,	GO:0005634~nucleus,	GO:0000977~RNA polymerase II transcription regulatory region sequence-specific DNA binding,GO:0000981~DNA-binding transcription factor activity, RNA polymerase II-specific,GO:0046872~metal ion binding,
LOC105431039	protein brambleberry-like(LOC105431039)	Pogonomyrmex barbatus		GO:0016020~membrane,
LOC105424148	protein charybde-like(LOC105424148)	Pogonomyrmex barbatus	GO:0006915~apoptotic process,GO:0009968~negative regulation of signal transduction,GO:0032006~regulation of TOR signaling,	GO:0005737~cytoplasm,
LOC105426266	protein claret segregational(LOC105426266)	Pogonomyrmex barbatus	GO:0007018~microtubule-based movement,	GO:0005737~cytoplasm,GO:0005874~microtubule,	GO:0003777~microtubule motor activity,GO:0005524~ATP binding,GO:0008017~microtubule binding,	pbar04814:Motor proteins,
LOC105426853	protein cortex-like(LOC105426853)	Pogonomyrmex barbatus	GO:0031145~anaphase-promoting complex-dependent catabolic process,GO:1904668~positive regulation of ubiquitin protein ligase activity,GO:1905786~positive regulation of anaphase-promoting complex-dependent catabolic process,	GO:0005680~anaphase-promoting complex,	GO:0005515~protein binding,GO:0010997~anaphase-promoting complex binding,GO:1990757~ubiquitin ligase activator activity,	pbar04120:Ubiquitin mediated proteolysis,
LOC105426319	protein gooseberry-like(LOC105426319)	Pogonomyrmex barbatus	GO:0006357~regulation of transcription by RNA polymerase II,GO:0048856~anatomical structure development,	GO:0005634~nucleus,	GO:0000978~RNA polymerase II cis-regulatory region sequence-specific DNA binding,GO:0000981~DNA-binding transcription factor activity, RNA polymerase II-specific,
LOC105426150	protein kinase C-binding protein NELL1-like(LOC105426150)	Pogonomyrmex barbatus	GO:0009653~anatomical structure morphogenesis,GO:0030154~cell differentiation,GO:0048513~animal organ development,	GO:0005615~extracellular space,GO:0016020~membrane,	GO:0005509~calcium ion binding,GO:0005515~protein binding,GO:0008201~heparin binding,GO:0016301~kinase activity,
LOC105433058	protein lin-9 homolog(LOC105433058)	Pogonomyrmex barbatus	GO:0006351~DNA-templated transcription,GO:0006357~regulation of transcription by RNA polymerase II,GO:0051726~regulation of cell cycle,	GO:0005654~nucleoplasm,GO:0017053~transcription repressor complex,	GO:0003677~DNA binding,
LOC105430015	protein nanos(nanos)	Pogonomyrmex barbatus	GO:0006417~regulation of translation,GO:0017148~negative regulation of translation,GO:0048477~oogenesis,	GO:0005737~cytoplasm,GO:0048471~perinuclear region of cytoplasm,	GO:0003723~RNA binding,GO:0003729~mRNA binding,GO:0008270~zinc ion binding,
LOC105433275	protein phosphatase 1 regulatory subunit 42-like(LOC105433275)	Pogonomyrmex barbatus			GO:0005515~protein binding,
LOC105424627	protein regulator of cytokinesis 1-like(LOC105424627)	Pogonomyrmex barbatus	GO:0000226~microtubule cytoskeleton organization,GO:0051256~mitotic spindle midzone assembly,	GO:0005737~cytoplasm,GO:0005819~spindle,GO:1990023~mitotic spindle midzone,	GO:0008017~microtubule binding,
LOC105431108	protein rolling stone-like(LOC105431108)	Pogonomyrmex barbatus		GO:0016020~membrane,
LOC105432123	protein scarlet(LOC105432123)	Pogonomyrmex barbatus		GO:0005886~plasma membrane,GO:0030659~cytoplasmic vesicle membrane,	GO:0005524~ATP binding,GO:0016887~ATP hydrolysis activity,GO:0140359~ABC-type transporter activity,
LOC105428768	protein tyrosine phosphatase, mitochondrial 1(PTPMT1)	Pogonomyrmex barbatus	GO:0006470~protein dephosphorylation,GO:0008654~phospholipid biosynthetic process,		GO:0004439~phosphatidylinositol-4,5-bisphosphate 5-phosphatase activity,GO:0004721~phosphoprotein phosphatase activity,GO:0005525~GTP binding,GO:0008138~protein tyrosine/serine/threonine phosphatase activity,GO:0008962~phosphatidylglycerophosphatase activity,
LOC105427980	protein yellow(LOC105427980)	Pogonomyrmex barbatus		GO:0005576~extracellular region,
LOC105426145	protein-glutamate O-methyltransferase-like(LOC105426145)	Pogonomyrmex barbatus	GO:0006974~DNA damage response,GO:0032259~methylation,	GO:0005634~nucleus,GO:0005737~cytoplasm,	GO:0016791~phosphatase activity,GO:0046872~metal ion binding,GO:0051998~protein carboxyl O-methyltransferase activity,
LOC105430247	proto-oncogene like protein Myb(Myb)	Pogonomyrmex barbatus	GO:0006355~regulation of DNA-templated transcription,	GO:0005634~nucleus,	GO:0000978~RNA polymerase II cis-regulatory region sequence-specific DNA binding,GO:0000981~DNA-binding transcription factor activity, RNA polymerase II-specific,
LOC105429123	proton-coupled amino acid transporter-like protein CG1139(LOC105429123)	Pogonomyrmex barbatus	GO:0003333~amino acid transmembrane transport,	GO:0005774~vacuolar membrane,	GO:0015171~amino acid transmembrane transporter activity,GO:0015179~L-amino acid transmembrane transporter activity,
LOC105429161	proton-coupled amino acid transporter-like protein CG1139(LOC105429161)	Pogonomyrmex barbatus	GO:0003333~amino acid transmembrane transport,	GO:0005774~vacuolar membrane,	GO:0015171~amino acid transmembrane transporter activity,GO:0015179~L-amino acid transmembrane transporter activity,
LOC105430820	proton-coupled folate transporter-like(LOC105430820)	Pogonomyrmex barbatus	GO:0055085~transmembrane transport,	GO:0016020~membrane,	GO:0022857~transmembrane transporter activity,	pbar04977:Vitamin digestion and absorption,pbar04981:Folate transport and metabolism,
LOC105430431	putative ATP-dependent RNA helicase DHX57(LOC105430431)	Pogonomyrmex barbatus		GO:0005622~intracellular anatomical structure,	GO:0003723~RNA binding,GO:0004386~helicase activity,GO:0005524~ATP binding,
LOC105432096	putative fatty acyl-CoA reductase CG5065(LOC105432096)	Pogonomyrmex barbatus	GO:0035336~long-chain fatty-acyl-CoA metabolic process,	GO:0005777~peroxisome,GO:0016020~membrane,	GO:0080019~alcohol-forming very long-chain fatty acyl-CoA reductase activity,GO:0102965~alcohol-forming long-chain fatty acyl-CoA reductase activity,	pbar04146:Peroxisome,
LOC105432099	putative fatty acyl-CoA reductase CG5065(LOC105432099)	Pogonomyrmex barbatus	GO:0035336~long-chain fatty-acyl-CoA metabolic process,	GO:0005777~peroxisome,GO:0016020~membrane,	GO:0080019~alcohol-forming very long-chain fatty acyl-CoA reductase activity,GO:0102965~alcohol-forming long-chain fatty acyl-CoA reductase activity,	pbar04146:Peroxisome,
LOC105434327	putative fatty acyl-CoA reductase CG5065(LOC105434327)	Pogonomyrmex barbatus	GO:0035336~long-chain fatty-acyl-CoA metabolic process,	GO:0005777~peroxisome,GO:0016020~membrane,	GO:0080019~alcohol-forming very long-chain fatty acyl-CoA reductase activity,	pbar04146:Peroxisome,
LOC105432528	putative odorant receptor 69a(LOC105432528)	Pogonomyrmex barbatus	GO:0007165~signal transduction,GO:0007608~sensory perception of smell,GO:0050911~detection of chemical stimulus involved in sensory perception of smell,	GO:0005886~plasma membrane,	GO:0004984~olfactory receptor activity,GO:0005549~odorant binding,
LOC105432221	putative thiamine transporter SLC35F3(LOC105432221)	Pogonomyrmex barbatus		GO:0016020~membrane,
LOC105428555	putative threonine dehydratase(LOC105428555)	Pogonomyrmex barbatus	GO:0006565~L-serine catabolic process,GO:0006567~threonine catabolic process,GO:0009097~isoleucine biosynthetic process,		GO:0003941~L-serine ammonia-lyase activity,GO:0004794~threonine deaminase activity,	pbar00260:Glycine, serine and threonine metabolism,pbar00290:Valine, leucine and isoleucine biosynthesis,pbar01100:Metabolic pathways,pbar01200:Carbon metabolism,pbar01230:Biosynthesis of amino acids,
LOC105423703	putative zinc metalloproteinase YIL108W(LOC105423703)	Pogonomyrmex barbatus			GO:0008237~metallopeptidase activity,
LOC105428241	putative zinc protease mug138(LOC105428241)	Pogonomyrmex barbatus	GO:0006508~proteolysis,		GO:0008233~peptidase activity,
LOC105425849	queuosine salvage protein-like(LOC105425849)	Pogonomyrmex barbatus	GO:0101030~tRNA-guanine transglycosylation,		GO:0016787~hydrolase activity,
LOC105425852	queuosine salvage protein-like(LOC105425852)	Pogonomyrmex barbatus	GO:0101030~tRNA-guanine transglycosylation,		GO:0016787~hydrolase activity,
LOC105425857	queuosine salvage protein-like(LOC105425857)	Pogonomyrmex barbatus	GO:0101030~tRNA-guanine transglycosylation,		GO:0016787~hydrolase activity,
LOC105424677	rac GTPase-activating protein 1-like(LOC105424677)	Pogonomyrmex barbatus	GO:0000281~mitotic cytokinesis,GO:0007266~Rho protein signal transduction,GO:0051256~mitotic spindle midzone assembly,	GO:0005634~nucleus,GO:0030496~midbody,GO:0032154~cleavage furrow,GO:0051233~spindle midzone,GO:0097149~centralspindlin complex,	GO:0005096~GTPase activator activity,GO:0046872~metal ion binding,
LOC105427787	ras GTPase-activating-like protein IQGAP1(LOC105427787)	Pogonomyrmex barbatus	GO:0032956~regulation of actin cytoskeleton organization,GO:0043087~regulation of GTPase activity,GO:1903479~mitotic actomyosin contractile ring assembly actin filament organization,	GO:0005737~cytoplasm,GO:0005938~cell cortex,	GO:0005096~GTPase activator activity,GO:0005516~calmodulin binding,GO:0051015~actin filament binding,
LOC105428239	ras guanine nucleotide exchange factor R-like(LOC105428239)	Pogonomyrmex barbatus		GO:0005615~extracellular space,
LOC105426184	ras-related protein Rab-32-like(LOC105426184)	Pogonomyrmex barbatus	GO:0008333~endosome to lysosome transport,GO:0016192~vesicle-mediated transport,GO:0090385~phagosome-lysosome fusion,	GO:0000139~Golgi membrane,GO:0005764~lysosome,GO:0005770~late endosome,GO:0005794~Golgi apparatus,GO:0005802~trans-Golgi network,GO:0016020~membrane,GO:0031982~vesicle,GO:0045335~phagocytic vesicle,	GO:0003924~GTPase activity,GO:0005525~GTP binding,
LOC105426822	receptor-type tyrosine-protein phosphatase S-like(LOC105426822)	Pogonomyrmex barbatus	GO:0006470~protein dephosphorylation,GO:0008045~motor neuron axon guidance,		GO:0004725~protein tyrosine phosphatase activity,
LOC105429068	receptor-type tyrosine-protein phosphatase kappa-like(LOC105429068)	Pogonomyrmex barbatus	GO:0006470~protein dephosphorylation,GO:0008045~motor neuron axon guidance,	GO:0016020~membrane,	GO:0004725~protein tyrosine phosphatase activity,GO:0004726~non-membrane spanning protein tyrosine phosphatase activity,GO:0005515~protein binding,GO:0030946~protein tyrosine phosphatase activity, metal-dependent,GO:0140793~histone H2AXY142 phosphatase activity,
LOC105432050	receptor-type tyrosine-protein phosphatase kappa-like(LOC105432050)	Pogonomyrmex barbatus	GO:0006470~protein dephosphorylation,GO:0008045~motor neuron axon guidance,	GO:0016020~membrane,	GO:0004725~protein tyrosine phosphatase activity,GO:0004726~non-membrane spanning protein tyrosine phosphatase activity,GO:0005515~protein binding,GO:0030946~protein tyrosine phosphatase activity, metal-dependent,GO:0140793~histone H2AXY142 phosphatase activity,
LOC105433982	retinal homeobox protein Rx-like(LOC105433982)	Pogonomyrmex barbatus	GO:0045944~positive regulation of transcription by RNA polymerase II,	GO:0005634~nucleus,	GO:0000978~RNA polymerase II cis-regulatory region sequence-specific DNA binding,GO:0000981~DNA-binding transcription factor activity, RNA polymerase II-specific,
LOC105429557	retinal homeobox protein Rx3-like(LOC105429557)	Pogonomyrmex barbatus	GO:0006357~regulation of transcription by RNA polymerase II,GO:0045944~positive regulation of transcription by RNA polymerase II,	GO:0005634~nucleus,	GO:0000977~RNA polymerase II transcription regulatory region sequence-specific DNA binding,GO:0000978~RNA polymerase II cis-regulatory region sequence-specific DNA binding,GO:0000981~DNA-binding transcription factor activity, RNA polymerase II-specific,
LOC105432899	retinoid-inducible serine carboxypeptidase-like(LOC105432899)	Pogonomyrmex barbatus	GO:0006508~proteolysis,		GO:0004185~serine-type carboxypeptidase activity,
LOC105428632	retinol dehydrogenase 11-like(LOC105428632)	Pogonomyrmex barbatus			GO:0016491~oxidoreductase activity,	pbar00830:Retinol metabolism,pbar01100:Metabolic pathways,pbar01240:Biosynthesis of cofactors,
LOC105431710	retinol dehydrogenase 12-like(LOC105431710)	Pogonomyrmex barbatus			GO:0016491~oxidoreductase activity,	pbar00830:Retinol metabolism,pbar01100:Metabolic pathways,pbar01240:Biosynthesis of cofactors,
LOC105432391	retinol dehydrogenase 14(LOC105432391)	Pogonomyrmex barbatus		GO:0016020~membrane,	GO:0016491~oxidoreductase activity,
LOC105427888	rho guanine nucleotide exchange factor 3-like(LOC105427888)	Pogonomyrmex barbatus	GO:0035025~positive regulation of Rho protein signal transduction,GO:0035556~intracellular signal transduction,	GO:0005737~cytoplasm,	GO:0005085~guanyl-nucleotide exchange factor activity,
LOC105424019	rhodopsin-like(LOC105424019)	Pogonomyrmex barbatus	GO:0007186~G protein-coupled receptor signaling pathway,	GO:0001750~photoreceptor outer segment,GO:0016020~membrane,	GO:0004930~G protein-coupled receptor activity,
LOC105427022	rigor mortis(rig)	Pogonomyrmex barbatus	GO:0000387~spliceosomal snRNP assembly,	GO:0005634~nucleus,GO:0032797~SMN complex,	GO:0003730~mRNA 3'-UTR binding,GO:0005515~protein binding,
LOC105431636	ringmaker(ringer)	Pogonomyrmex barbatus	GO:0001578~microtubule bundle formation,GO:0032273~positive regulation of protein polymerization,GO:0046785~microtubule polymerization,	GO:0005874~microtubule,	GO:0015631~tubulin binding,
LOC105433276	rough deal(rod)	Pogonomyrmex barbatus	GO:0000070~mitotic sister chromatid segregation,GO:0007094~mitotic spindle assembly checkpoint signaling,GO:1903394~protein localization to kinetochore involved in kinetochore assembly,	GO:0005737~cytoplasm,GO:0005828~kinetochore microtubule,GO:1990423~RZZ complex,	GO:0031267~small GTPase binding,
LOC105429359	scavenger receptor class B member 1-like(LOC105429359)	Pogonomyrmex barbatus		GO:0005737~cytoplasm,GO:0005886~plasma membrane,GO:0016020~membrane,	GO:0005044~scavenger receptor activity,	pbar03272:Virion - Hepatitis viruses,pbar04145:Phagosome,pbar04977:Vitamin digestion and absorption,
LOC105427783	segmentation polarity homeobox protein engrailed-like(LOC105427783)	Pogonomyrmex barbatus	GO:0006357~regulation of transcription by RNA polymerase II,GO:0007275~multicellular organism development,GO:0030182~neuron differentiation,	GO:0005634~nucleus,	GO:0000978~RNA polymerase II cis-regulatory region sequence-specific DNA binding,GO:0000981~DNA-binding transcription factor activity, RNA polymerase II-specific,	pbar04341:Hedgehog signaling pathway - fly,
LOC105434206	segmentation protein Runt-like(LOC105434206)	Pogonomyrmex barbatus	GO:0006355~regulation of DNA-templated transcription,	GO:0005634~nucleus,	GO:0000978~RNA polymerase II cis-regulatory region sequence-specific DNA binding,GO:0000981~DNA-binding transcription factor activity, RNA polymerase II-specific,GO:0005524~ATP binding,
LOC105430600	segmentation protein even-skipped(LOC105430600)	Pogonomyrmex barbatus	GO:0006357~regulation of transcription by RNA polymerase II,	GO:0005634~nucleus,	GO:0000978~RNA polymerase II cis-regulatory region sequence-specific DNA binding,GO:0000981~DNA-binding transcription factor activity, RNA polymerase II-specific,
LOC105424685	separase(Sse)	Pogonomyrmex barbatus	GO:0006508~proteolysis,GO:0051307~meiotic chromosome separation,	GO:0005634~nucleus,GO:0005737~cytoplasm,GO:0005813~centrosome,GO:0072686~mitotic spindle,	GO:0004197~cysteine-type endopeptidase activity,
LOC105425288	serine protease inhibitor 88Ea-like(LOC105425288)	Pogonomyrmex barbatus		GO:0005615~extracellular space,	GO:0004867~serine-type endopeptidase inhibitor activity,
LOC105430350	serine protease persephone-like(LOC105430350)	Pogonomyrmex barbatus	GO:0006508~proteolysis,		GO:0004252~serine-type endopeptidase activity,	pbar04624:Toll and Imd signaling pathway,
LOC105427675	serine-enriched protein(LOC105427675)	Pogonomyrmex barbatus			GO:0005515~protein binding,
LOC105422528	serine/threonine-protein kinase Nek5-like(LOC105422528)	Pogonomyrmex barbatus	GO:0006468~protein phosphorylation,		GO:0004672~protein kinase activity,GO:0004674~protein serine/threonine kinase activity,GO:0005524~ATP binding,
LOC105423596	serine/threonine-protein kinase VRK1(LOC105423596)	Pogonomyrmex barbatus	GO:0007165~signal transduction,GO:0018105~peptidyl-serine phosphorylation,	GO:0005634~nucleus,GO:0005737~cytoplasm,	GO:0004672~protein kinase activity,GO:0004674~protein serine/threonine kinase activity,GO:0005524~ATP binding,
LOC105430334	serine/threonine-protein kinase dyf-5(LOC105430334)	Pogonomyrmex barbatus	GO:0006468~protein phosphorylation,GO:0035556~intracellular signal transduction,GO:0042073~intraciliary transport,GO:0060271~cilium assembly,	GO:0005634~nucleus,GO:0005737~cytoplasm,GO:0005929~cilium,	GO:0004674~protein serine/threonine kinase activity,GO:0005524~ATP binding,
LOC105428614	serotonin receptor(5-HT1)	Pogonomyrmex barbatus	GO:0043410~positive regulation of MAPK cascade,GO:0071880~adenylate cyclase-activating adrenergic receptor signaling pathway,	GO:0005886~plasma membrane,GO:0016020~membrane,GO:0045202~synapse,	GO:0004930~G protein-coupled receptor activity,	pbar04080:Neuroactive ligand-receptor interaction,
LOC105424407	shaven(sv)	Pogonomyrmex barbatus	GO:0006357~regulation of transcription by RNA polymerase II,GO:0048856~anatomical structure development,	GO:0005634~nucleus,	GO:0000978~RNA polymerase II cis-regulatory region sequence-specific DNA binding,GO:0000981~DNA-binding transcription factor activity, RNA polymerase II-specific,
LOC105422636	short transient receptor potential channel 6-like(LOC105422636)	Pogonomyrmex barbatus	GO:0006828~manganese ion transport,GO:0051480~regulation of cytosolic calcium ion concentration,GO:0070588~calcium ion transmembrane transport,	GO:0005886~plasma membrane,GO:0016020~membrane,GO:0034703~cation channel complex,	GO:0015279~store-operated calcium channel activity,GO:0070679~inositol 1,4,5 trisphosphate binding,
LOC105426339	sialin(LOC105426339)	Pogonomyrmex barbatus	GO:0006820~monoatomic anion transport,GO:0055085~transmembrane transport,	GO:0005886~plasma membrane,GO:0016020~membrane,	GO:0022857~transmembrane transporter activity,
LOC105427662	signal sequence receptor beta(LOC105427662)	Pogonomyrmex barbatus	GO:0072488~ammonium transmembrane transport,GO:0097272~ammonium homeostasis,	GO:0005886~plasma membrane,GO:0016020~membrane,	GO:0008519~ammonium channel activity,
LOC105427688	sodium channel protein Nach-like(LOC105427688)	Pogonomyrmex barbatus	GO:0035725~sodium ion transmembrane transport,	GO:0005886~plasma membrane,GO:0016020~membrane,	GO:0015280~ligand-gated sodium channel activity,
LOC105426288	sodium- and chloride-dependent transporter XTRP3(LOC105426288)	Pogonomyrmex barbatus	GO:0035725~sodium ion transmembrane transport,GO:0089718~amino acid import across plasma membrane,	GO:0005886~plasma membrane,GO:0016020~membrane,	GO:0005283~amino acid:sodium symporter activity,GO:0015187~glycine transmembrane transporter activity,GO:0046872~metal ion binding,
LOC105424888	sodium-coupled monocarboxylate transporter 1(LOC105424888)	Pogonomyrmex barbatus	GO:0006814~sodium ion transport,GO:0055085~transmembrane transport,	GO:0005886~plasma membrane,GO:0016020~membrane,	GO:0015293~symporter activity,
LOC105432164	sodium/hydrogen exchanger 9B2-like(LOC105432164)	Pogonomyrmex barbatus	GO:0098662~inorganic cation transmembrane transport,	GO:0016020~membrane,
LOC105433830	solute carrier family 2, facilitated glucose transporter member 1-like(LOC105433830)	Pogonomyrmex barbatus	GO:0015749~monosaccharide transmembrane transport,	GO:0016020~membrane,	GO:0015149~hexose transmembrane transporter activity,	pbar04148:Efferocytosis,
LOC105430575	somatostatin receptor type 2-like(LOC105430575)	Pogonomyrmex barbatus	GO:0007186~G protein-coupled receptor signaling pathway,	GO:0005886~plasma membrane,GO:0016020~membrane,GO:0043005~neuron projection,	GO:0004994~somatostatin receptor activity,GO:0042277~peptide binding,
LOC105432492	sosie(sosie)	Pogonomyrmex barbatus		GO:0016020~membrane,
LOC105433617	sphingomyelin phosphodiesterase-like(LOC105433617)	Pogonomyrmex barbatus	GO:0006685~sphingomyelin catabolic process,GO:0046513~ceramide biosynthetic process,	GO:0005615~extracellular space,GO:0005764~lysosome,GO:0016020~membrane,	GO:0016798~hydrolase activity, acting on glycosyl bonds,GO:0046872~metal ion binding,GO:0061750~acid sphingomyelin phosphodiesterase activity,	pbar00600:Sphingolipid metabolism,pbar01100:Metabolic pathways,pbar04142:Lysosome,
LOC105426998	spindle and kinetochore-associated protein 1-like(LOC105426998)	Pogonomyrmex barbatus	GO:0000278~mitotic cell cycle,GO:0007059~chromosome segregation,GO:0031110~regulation of microtubule polymerization or depolymerization,GO:0051301~cell division,	GO:0000940~outer kinetochore,GO:0005876~spindle microtubule,GO:0072686~mitotic spindle,	GO:0008017~microtubule binding,
LOC105423895	spindle defective 2(spd-2)	Pogonomyrmex barbatus	GO:0007099~centriole replication,GO:0051298~centrosome duplication,GO:0071539~protein localization to centrosome,GO:0090222~centrosome-templated microtubule nucleation,GO:0090307~mitotic spindle assembly,	GO:0000242~pericentriolar material,GO:0005737~cytoplasm,GO:0005814~centriole,	GO:0019901~protein kinase binding,
LOC105424471	spineless(ss)	Pogonomyrmex barbatus	GO:0006357~regulation of transcription by RNA polymerase II,GO:0006805~xenobiotic metabolic process,GO:0045944~positive regulation of transcription by RNA polymerase II,	GO:0005634~nucleus,GO:0034751~aryl hydrocarbon receptor complex,	GO:0000976~transcription cis-regulatory region binding,GO:0004879~nuclear receptor activity,GO:0046983~protein dimerization activity,
LOC105431153	stuck in traffic(sit)	Pogonomyrmex barbatus	GO:0019367~fatty acid elongation, saturated fatty acid,GO:0030148~sphingolipid biosynthetic process,GO:0034625~fatty acid elongation, monounsaturated fatty acid,GO:0034626~fatty acid elongation, polyunsaturated fatty acid,GO:0042761~very long-chain fatty acid biosynthetic process,	GO:0005789~endoplasmic reticulum membrane,	GO:0009922~fatty acid elongase activity,	pbar00062:Fatty acid elongation,pbar01040:Biosynthesis of unsaturated fatty acids,pbar01100:Metabolic pathways,pbar01212:Fatty acid metabolism,
LOC105433857	sugar-free frosting(sff)	Pogonomyrmex barbatus	GO:0000226~microtubule cytoskeleton organization,GO:0006468~protein phosphorylation,GO:0007399~nervous system development,GO:0035556~intracellular signal transduction,	GO:0005737~cytoplasm,	GO:0004674~protein serine/threonine kinase activity,GO:0005524~ATP binding,GO:0046872~metal ion binding,GO:0050321~tau-protein kinase activity,
LOC105428329	sushi, von Willebrand factor type A, EGF and pentraxin domain-containing protein uif(uif)	Pogonomyrmex barbatus	GO:0007219~Notch signaling pathway,	GO:0016020~membrane,	GO:0005112~Notch binding,GO:0005509~calcium ion binding,GO:0008236~serine-type peptidase activity,
LOC105424810	targeting protein for Xklp2 homolog(LOC105424810)	Pogonomyrmex barbatus	GO:0032147~activation of protein kinase activity,GO:0060236~regulation of mitotic spindle organization,	GO:0005737~cytoplasm,GO:0005819~spindle,GO:0005874~microtubule,
LOC105434147	tet methylcytosine dioxygenase-like(Tet)	Pogonomyrmex barbatus	GO:0045944~positive regulation of transcription by RNA polymerase II,GO:0070989~oxidative demethylation,GO:0141167~chromosomal 5-methylcytosine DNA demethylation, oxidation pathway,	GO:0005634~nucleus,GO:0005694~chromosome,	GO:0003677~DNA binding,GO:0008270~zinc ion binding,GO:0070579~5-methylcytosine dioxygenase activity,
LOC105423450	tetraspanin-7-like(LOC105423450)	Pogonomyrmex barbatus		GO:0005886~plasma membrane,GO:0016020~membrane,
LOC105428221	threonine dehydratase, mitochondrial-like(LOC105428221)	Pogonomyrmex barbatus	GO:0006565~L-serine catabolic process,GO:0006567~threonine catabolic process,GO:0009097~isoleucine biosynthetic process,		GO:0003941~L-serine ammonia-lyase activity,GO:0004794~threonine deaminase activity,	pbar00260:Glycine, serine and threonine metabolism,pbar00290:Valine, leucine and isoleucine biosynthesis,pbar01100:Metabolic pathways,pbar01200:Carbon metabolism,pbar01230:Biosynthesis of amino acids,
LOC105427757	transcription factor Adf-1-like(LOC105427757)	Pogonomyrmex barbatus	GO:0006357~regulation of transcription by RNA polymerase II,	GO:0005634~nucleus,GO:0005667~transcription regulator complex,
LOC105434010	transcription factor Sox-21-like(LOC105434010)	Pogonomyrmex barbatus	GO:0006355~regulation of DNA-templated transcription,GO:0009653~anatomical structure morphogenesis,GO:0030154~cell differentiation,	GO:0005634~nucleus,	GO:0000978~RNA polymerase II cis-regulatory region sequence-specific DNA binding,GO:0000981~DNA-binding transcription factor activity, RNA polymerase II-specific,GO:0001228~DNA-binding transcription activator activity, RNA polymerase II-specific,
LOC105427723	transcription factor hamlet-like(LOC105427723)	Pogonomyrmex barbatus		GO:0005634~nucleus,
LOC105433437	transcription termination factor lodestar(lds)	Pogonomyrmex barbatus	GO:0006281~DNA repair,	GO:0005634~nucleus,	GO:0005524~ATP binding,GO:0008094~ATP-dependent activity, acting on DNA,GO:0016787~hydrolase activity,GO:0140658~ATP-dependent chromatin remodeler activity,
LOC105434009	transcriptional regulator ovo(ovo)	Pogonomyrmex barbatus	GO:0006357~regulation of transcription by RNA polymerase II,GO:0009913~epidermal cell differentiation,	GO:0005634~nucleus,	GO:0000978~RNA polymerase II cis-regulatory region sequence-specific DNA binding,GO:0000981~DNA-binding transcription factor activity, RNA polymerase II-specific,GO:0046872~metal ion binding,
LOC105422222	transferrin-like(LOC105422222)	Pogonomyrmex barbatus	GO:0006826~iron ion transport,	GO:0005615~extracellular space,GO:0005769~early endosome,GO:0005886~plasma membrane,GO:0055037~recycling endosome,
LOC105424406	transient receptor potential channel pyrexia-like(LOC105424406)	Pogonomyrmex barbatus	GO:0006811~monoatomic ion transport,GO:0055085~transmembrane transport,	GO:0016020~membrane,GO:0034703~cation channel complex,	GO:0005216~monoatomic ion channel activity,GO:0005261~monoatomic cation channel activity,GO:0005515~protein binding,
LOC105428332	transient receptor potential-like(trpl)	Pogonomyrmex barbatus	GO:0006828~manganese ion transport,GO:0051480~regulation of cytosolic calcium ion concentration,GO:0070588~calcium ion transmembrane transport,	GO:0005886~plasma membrane,GO:0016020~membrane,GO:0034703~cation channel complex,	GO:0005515~protein binding,GO:0015279~store-operated calcium channel activity,GO:0070679~inositol 1,4,5 trisphosphate binding,	pbar04745:Phototransduction - fly,
LOC105422852	transmembrane protease serine 9-like(LOC105422852)	Pogonomyrmex barbatus	GO:0006508~proteolysis,	GO:0005615~extracellular space,	GO:0004252~serine-type endopeptidase activity,
LOC105423701	transmembrane protein 17-like(LOC105423701)	Pogonomyrmex barbatus	GO:1905515~non-motile cilium assembly,	GO:0016020~membrane,GO:0035869~ciliary transition zone,
LOC105425002	transmembrane protein 177(LOC105425002)	Pogonomyrmex barbatus		GO:0016020~membrane,
LOC105430998	transmembrane protein 35A(LOC105430998)	Pogonomyrmex barbatus	GO:0051131~chaperone-mediated protein complex assembly,GO:2000010~positive regulation of protein localization to cell surface,	GO:0005778~peroxisomal membrane,GO:0005783~endoplasmic reticulum,GO:0005789~endoplasmic reticulum membrane,GO:0031410~cytoplasmic vesicle,
LOC105426437	trypsin-1-like(LOC105426437)	Pogonomyrmex barbatus	GO:0006508~proteolysis,	GO:0005615~extracellular space,	GO:0004252~serine-type endopeptidase activity,
LOC105432589	trypsin-1-like(LOC105432589)	Pogonomyrmex barbatus	GO:0006508~proteolysis,	GO:0005576~extracellular region,	GO:0004252~serine-type endopeptidase activity,	pbar04080:Neuroactive ligand-receptor interaction,
LOC105423583	tubulin polyglutamylase TTLL13-like(LOC105423583)	Pogonomyrmex barbatus	GO:0000226~microtubule cytoskeleton organization,GO:0018095~protein polyglutamylation,GO:0036211~protein modification process,	GO:0005929~cilium,GO:0036064~ciliary basal body,	GO:0015631~tubulin binding,GO:0070740~tubulin-glutamic acid ligase activity,
LOC105431421	tudor and KH domain containing protein papi(papi)	Pogonomyrmex barbatus	GO:0007283~spermatogenesis,GO:0030719~P granule organization,GO:0034587~piRNA processing,	GO:0005739~mitochondrion,GO:0043186~P granule,	GO:0003723~RNA binding,
LOC105431041	twist(Twi)	Pogonomyrmex barbatus	GO:0006357~regulation of transcription by RNA polymerase II,GO:0010557~positive regulation of macromolecule biosynthetic process,GO:0032502~developmental process,GO:0045165~cell fate commitment,GO:0072002~Malpighian tubule development,	GO:0005634~nucleus,	GO:0000977~RNA polymerase II transcription regulatory region sequence-specific DNA binding,GO:0000981~DNA-binding transcription factor activity, RNA polymerase II-specific,GO:0046982~protein heterodimerization activity,GO:0046983~protein dimerization activity,
LOC105423652	tyrosine hydroxylase ple(ple)	Pogonomyrmex barbatus	GO:0006585~dopamine biosynthetic process from tyrosine,	GO:0005737~cytoplasm,GO:0030424~axon,GO:0043204~perikaryon,	GO:0004511~tyrosine 3-monooxygenase activity,GO:0005506~iron ion binding,	pbar00350:Tyrosine metabolism,pbar00790:Folate biosynthesis,pbar01100:Metabolic pathways,
LOC105430215	ubiquinone biosynthesis O-methyltransferase, mitochondrial-like(LOC105430215)	Pogonomyrmex barbatus	GO:0006744~ubiquinone biosynthetic process,GO:0032259~methylation,	GO:0031314~extrinsic component of mitochondrial inner membrane,	GO:0008425~2-methoxy-6-polyprenyl-1,4-benzoquinol methyltransferase activity,GO:0010420~polyprenyldihydroxybenzoate methyltransferase activity,GO:0061542~3-demethylubiquinol 3-O-methyltransferase activity,	pbar00130:Ubiquinone and other terpenoid-quinone biosynthesis,pbar01100:Metabolic pathways,pbar01240:Biosynthesis of cofactors,
LOC105421964	uncharacterized LOC105421964(LOC105421964)	Pogonomyrmex barbatus		GO:0016020~membrane,	GO:0016614~oxidoreductase activity, acting on CH-OH group of donors,GO:0050660~flavin adenine dinucleotide binding,
LOC105421966	uncharacterized LOC105421966(LOC105421966)	Pogonomyrmex barbatus	GO:0006629~lipid metabolic process,GO:0016042~lipid catabolic process,			pbar00100:Steroid biosynthesis,pbar04142:Lysosome,pbar04148:Efferocytosis,
LOC105422152	uncharacterized LOC105422152(LOC105422152)	Pogonomyrmex barbatus	GO:0006869~lipid transport,		GO:0005319~lipid transporter activity,
LOC105422228	uncharacterized LOC105422228(LOC105422228)	Pogonomyrmex barbatus	GO:0060271~cilium assembly,	GO:0005929~cilium,
LOC105422248	uncharacterized LOC105422248(LOC105422248)	Pogonomyrmex barbatus		GO:0016020~membrane,
LOC105422336	uncharacterized LOC105422336(LOC105422336)	Pogonomyrmex barbatus	GO:0001676~long-chain fatty acid metabolic process,GO:0008218~bioluminescence,GO:0046949~fatty-acyl-CoA biosynthetic process,	GO:0005777~peroxisome,	GO:0004467~long-chain fatty acid-CoA ligase activity,GO:0004497~monooxygenase activity,GO:0016405~CoA-ligase activity,	pbar00130:Ubiquinone and other terpenoid-quinone biosynthesis,pbar01100:Metabolic pathways,
LOC105422463	uncharacterized LOC105422463(LOC105422463)	Pogonomyrmex barbatus	GO:0007165~signal transduction,GO:0007608~sensory perception of smell,GO:0019262~N-acetylneuraminate catabolic process,	GO:0005737~cytoplasm,GO:0016020~membrane,	GO:0004984~olfactory receptor activity,GO:0005549~odorant binding,GO:0008747~N-acetylneuraminate lyase activity,GO:0008840~4-hydroxy-tetrahydrodipicolinate synthase activity,GO:0016829~lyase activity,	pbar01100:Metabolic pathways,
LOC105422563	uncharacterized LOC105422563(LOC105422563)	Pogonomyrmex barbatus	GO:0000956~nuclear-transcribed mRNA catabolic process,GO:0110155~NAD-cap decapping,	GO:0005634~nucleus,GO:0005829~cytosol,	GO:0000166~nucleotide binding,GO:0003723~RNA binding,GO:0004518~nuclease activity,GO:0034353~mRNA 5'-diphosphatase activity,GO:0046872~metal ion binding,
LOC105423076	uncharacterized LOC105423076(LOC105423076)	Pogonomyrmex barbatus		GO:0016020~membrane,
LOC105423217	uncharacterized LOC105423217(LOC105423217)	Pogonomyrmex barbatus		GO:0005615~extracellular space,
LOC105423272	uncharacterized LOC105423272(LOC105423272)	Pogonomyrmex barbatus		GO:0005737~cytoplasm,	GO:0005515~protein binding,
LOC105423361	uncharacterized LOC105423361(LOC105423361)	Pogonomyrmex barbatus	GO:0000226~microtubule cytoskeleton organization,	GO:0005930~axoneme,GO:0036064~ciliary basal body,
LOC105423371	uncharacterized LOC105423371(LOC105423371)	Pogonomyrmex barbatus			GO:0003677~DNA binding,GO:0046872~metal ion binding,
LOC105423372	uncharacterized LOC105423372(LOC105423372)	Pogonomyrmex barbatus			GO:0003677~DNA binding,GO:0046872~metal ion binding,
LOC105423398	uncharacterized LOC105423398(LOC105423398)	Pogonomyrmex barbatus	GO:0006357~regulation of transcription by RNA polymerase II,GO:0010468~regulation of gene expression,	GO:0005634~nucleus,	GO:0000978~RNA polymerase II cis-regulatory region sequence-specific DNA binding,GO:0003700~DNA-binding transcription factor activity,GO:0005515~protein binding,GO:0046872~metal ion binding,
LOC105423471	uncharacterized LOC105423471(LOC105423471)	Pogonomyrmex barbatus			GO:0005515~protein binding,
LOC105423664	uncharacterized LOC105423664(LOC105423664)	Pogonomyrmex barbatus			GO:0003677~DNA binding,GO:0046872~metal ion binding,
LOC105423719	uncharacterized LOC105423719(LOC105423719)	Pogonomyrmex barbatus	GO:0006695~cholesterol biosynthetic process,GO:0008299~isoprenoid biosynthetic process,GO:0019287~isopentenyl diphosphate biosynthetic process, mevalonate pathway,	GO:0005737~cytoplasm,GO:0005829~cytosol,	GO:0004496~mevalonate kinase activity,GO:0005524~ATP binding,
LOC105423737	uncharacterized LOC105423737(LOC105423737)	Pogonomyrmex barbatus		GO:0005737~cytoplasm,	GO:0016301~kinase activity,
LOC105423755	uncharacterized LOC105423755(LOC105423755)	Pogonomyrmex barbatus	GO:0006695~cholesterol biosynthetic process,GO:0008299~isoprenoid biosynthetic process,GO:0019287~isopentenyl diphosphate biosynthetic process, mevalonate pathway,	GO:0005737~cytoplasm,GO:0005829~cytosol,	GO:0004496~mevalonate kinase activity,GO:0005524~ATP binding,	pbar00900:Terpenoid backbone biosynthesis,pbar01100:Metabolic pathways,pbar04146:Peroxisome,
LOC105423774	uncharacterized LOC105423774(LOC105423774)	Pogonomyrmex barbatus		GO:0016020~membrane,
LOC105424025	uncharacterized LOC105424025(LOC105424025)	Pogonomyrmex barbatus		GO:0016020~membrane,
LOC105424285	uncharacterized LOC105424285(LOC105424285)	Pogonomyrmex barbatus			GO:0005515~protein binding,
LOC105425008	uncharacterized LOC105425008(LOC105425008)	Pogonomyrmex barbatus			GO:0046872~metal ion binding,
LOC105425295	uncharacterized LOC105425295(LOC105425295)	Pogonomyrmex barbatus		GO:0005886~plasma membrane,	GO:0003924~GTPase activity,GO:0005246~calcium channel regulator activity,GO:0005525~GTP binding,
LOC105425319	uncharacterized LOC105425319(LOC105425319)	Pogonomyrmex barbatus		GO:0062129~chitin-based extracellular matrix,	GO:0008010~structural constituent of chitin-based larval cuticle,
LOC105425398	uncharacterized LOC105425398(LOC105425398)	Pogonomyrmex barbatus	GO:0007165~signal transduction,GO:0007608~sensory perception of smell,GO:0050911~detection of chemical stimulus involved in sensory perception of smell,	GO:0005886~plasma membrane,	GO:0004984~olfactory receptor activity,GO:0005549~odorant binding,
LOC105425438	uncharacterized LOC105425438(LOC105425438)	Pogonomyrmex barbatus		GO:0005576~extracellular region,	GO:0008061~chitin binding,
LOC105425722	uncharacterized LOC105425722(LOC105425722)	Pogonomyrmex barbatus	GO:0006357~regulation of transcription by RNA polymerase II,	GO:0005634~nucleus,	GO:0000978~RNA polymerase II cis-regulatory region sequence-specific DNA binding,GO:0000981~DNA-binding transcription factor activity, RNA polymerase II-specific,
LOC105425820	uncharacterized LOC105425820(LOC105425820)	Pogonomyrmex barbatus		GO:0016020~membrane,
LOC105425965	uncharacterized LOC105425965(LOC105425965)	Pogonomyrmex barbatus		GO:0005576~extracellular region,	GO:0004867~serine-type endopeptidase inhibitor activity,GO:0005515~protein binding,
LOC105425979	uncharacterized LOC105425979(LOC105425979)	Pogonomyrmex barbatus	GO:0030308~negative regulation of cell growth,	GO:0016020~membrane,
LOC105426047	uncharacterized LOC105426047(LOC105426047)	Pogonomyrmex barbatus			GO:0003677~DNA binding,GO:0046872~metal ion binding,
LOC105426276	uncharacterized LOC105426276(LOC105426276)	Pogonomyrmex barbatus	GO:0050906~detection of stimulus involved in sensory perception,	GO:0005886~plasma membrane,GO:0016020~membrane,	GO:0015276~ligand-gated monoatomic ion channel activity,
LOC105426291	uncharacterized LOC105426291(LOC105426291)	Pogonomyrmex barbatus	GO:0006508~proteolysis,GO:0043171~peptide catabolic process,	GO:0005615~extracellular space,GO:0005737~cytoplasm,GO:0005886~plasma membrane,GO:0098552~side of membrane,	GO:0008270~zinc ion binding,GO:0042277~peptide binding,GO:0070006~metalloaminopeptidase activity,	pbar00480:Glutathione metabolism,pbar01100:Metabolic pathways,
LOC105426382	uncharacterized LOC105426382(LOC105426382)	Pogonomyrmex barbatus	GO:0007165~signal transduction,GO:0007608~sensory perception of smell,GO:0050911~detection of chemical stimulus involved in sensory perception of smell,	GO:0005886~plasma membrane,	GO:0004984~olfactory receptor activity,GO:0005549~odorant binding,
LOC105426386	uncharacterized LOC105426386(LOC105426386)	Pogonomyrmex barbatus		GO:0016020~membrane,
LOC105426405	uncharacterized LOC105426405(LOC105426405)	Pogonomyrmex barbatus	GO:0007165~signal transduction,GO:0007608~sensory perception of smell,GO:0050911~detection of chemical stimulus involved in sensory perception of smell,	GO:0005886~plasma membrane,	GO:0004984~olfactory receptor activity,GO:0005549~odorant binding,
LOC105426862	uncharacterized LOC105426862(LOC105426862)	Pogonomyrmex barbatus			GO:0003677~DNA binding,GO:0046872~metal ion binding,
LOC105426889	uncharacterized LOC105426889(LOC105426889)	Pogonomyrmex barbatus			GO:0003677~DNA binding,GO:0046872~metal ion binding,
LOC105427001	uncharacterized LOC105427001(LOC105427001)	Pogonomyrmex barbatus	GO:0007051~spindle organization,	GO:0005813~centrosome,
LOC105427202	uncharacterized LOC105427202(LOC105427202)	Pogonomyrmex barbatus		GO:0005765~lysosomal membrane,GO:0030659~cytoplasmic vesicle membrane,GO:0031902~late endosome membrane,
LOC105427728	uncharacterized LOC105427728(LOC105427728)	Pogonomyrmex barbatus		GO:0016020~membrane,
LOC105427793	uncharacterized LOC105427793(LOC105427793)	Pogonomyrmex barbatus			GO:0016491~oxidoreductase activity,
LOC105427797	uncharacterized LOC105427797(LOC105427797)	Pogonomyrmex barbatus			GO:0016491~oxidoreductase activity,
LOC105428434	uncharacterized LOC105428434(LOC105428434)	Pogonomyrmex barbatus	GO:0006357~regulation of transcription by RNA polymerase II,GO:0032502~developmental process,GO:0045165~cell fate commitment,GO:0045944~positive regulation of transcription by RNA polymerase II,GO:0072002~Malpighian tubule development,	GO:0090575~RNA polymerase II transcription regulator complex,	GO:0000977~RNA polymerase II transcription regulatory region sequence-specific DNA binding,GO:0000981~DNA-binding transcription factor activity, RNA polymerase II-specific,GO:0046982~protein heterodimerization activity,GO:0046983~protein dimerization activity,
LOC105428558	uncharacterized LOC105428558(LOC105428558)	Pogonomyrmex barbatus	GO:0007165~signal transduction,GO:0007608~sensory perception of smell,GO:0050911~detection of chemical stimulus involved in sensory perception of smell,	GO:0005886~plasma membrane,	GO:0004984~olfactory receptor activity,GO:0005549~odorant binding,
LOC105428604	uncharacterized LOC105428604(LOC105428604)	Pogonomyrmex barbatus		GO:0016020~membrane,
LOC105428926	uncharacterized LOC105428926(LOC105428926)	Pogonomyrmex barbatus		GO:0016020~membrane,
LOC105428951	uncharacterized LOC105428951(LOC105428951)	Pogonomyrmex barbatus	GO:0007635~chemosensory behavior,GO:0008049~male courtship behavior,GO:0050909~sensory perception of taste,	GO:0005886~plasma membrane,GO:0016020~membrane,GO:0030424~axon,GO:0030425~dendrite,GO:0043025~neuronal cell body,
LOC105429004	uncharacterized LOC105429004(LOC105429004)	Pogonomyrmex barbatus		GO:0016020~membrane,
LOC105429023	uncharacterized LOC105429023(LOC105429023)	Pogonomyrmex barbatus	GO:0006334~nucleosome assembly,	GO:0000786~nucleosome,	GO:0003677~DNA binding,
LOC105429435	uncharacterized LOC105429435(LOC105429435)	Pogonomyrmex barbatus	GO:0007165~signal transduction,
LOC105429607	uncharacterized LOC105429607(LOC105429607)	Pogonomyrmex barbatus	GO:0014059~regulation of dopamine secretion,GO:0017156~calcium-ion regulated exocytosis,GO:0017158~regulation of calcium ion-dependent exocytosis,GO:0048488~synaptic vesicle endocytosis,GO:0048791~calcium ion-regulated exocytosis of neurotransmitter,GO:0071277~cellular response to calcium ion,	GO:0005886~plasma membrane,GO:0070382~exocytic vesicle,GO:0098793~presynapse,	GO:0000149~SNARE binding,GO:0001786~phosphatidylserine binding,GO:0005509~calcium ion binding,GO:0005544~calcium-dependent phospholipid binding,GO:0030276~clathrin binding,
LOC105429764	uncharacterized LOC105429764(LOC105429764)	Pogonomyrmex barbatus		GO:0016020~membrane,
LOC105429780	uncharacterized LOC105429780(LOC105429780)	Pogonomyrmex barbatus	GO:0007189~adenylate cyclase-activating G protein-coupled receptor signaling pathway,GO:0019222~regulation of metabolic process,	GO:0005886~plasma membrane,GO:0016020~membrane,	GO:0004930~G protein-coupled receptor activity,GO:0031210~phosphatidylcholine binding,
LOC105429852	uncharacterized LOC105429852(LOC105429852)	Pogonomyrmex barbatus			GO:0016491~oxidoreductase activity,
LOC105429855	uncharacterized LOC105429855(LOC105429855)	Pogonomyrmex barbatus			GO:0016491~oxidoreductase activity,
LOC105429856	uncharacterized LOC105429856(LOC105429856)	Pogonomyrmex barbatus			GO:0016491~oxidoreductase activity,
LOC105430129	uncharacterized LOC105430129(LOC105430129)	Pogonomyrmex barbatus	GO:0006508~proteolysis,	GO:0005576~extracellular region,	GO:0004252~serine-type endopeptidase activity,
LOC105430427	uncharacterized LOC105430427(LOC105430427)	Pogonomyrmex barbatus		GO:0016020~membrane,
LOC105430543	uncharacterized LOC105430543(LOC105430543)	Pogonomyrmex barbatus	GO:0006357~regulation of transcription by RNA polymerase II,GO:0009653~anatomical structure morphogenesis,GO:0030154~cell differentiation,	GO:0005634~nucleus,	GO:0000978~RNA polymerase II cis-regulatory region sequence-specific DNA binding,GO:0000981~DNA-binding transcription factor activity, RNA polymerase II-specific,
LOC105430573	uncharacterized LOC105430573(LOC105430573)	Pogonomyrmex barbatus		GO:0016020~membrane,
LOC105430622	uncharacterized LOC105430622(LOC105430622)	Pogonomyrmex barbatus		GO:0005737~cytoplasm,	GO:0016301~kinase activity,
LOC105430626	uncharacterized LOC105430626(LOC105430626)	Pogonomyrmex barbatus	GO:0006695~cholesterol biosynthetic process,GO:0008299~isoprenoid biosynthetic process,GO:0019287~isopentenyl diphosphate biosynthetic process, mevalonate pathway,	GO:0005737~cytoplasm,GO:0005829~cytosol,	GO:0004496~mevalonate kinase activity,GO:0005524~ATP binding,
LOC105430690	uncharacterized LOC105430690(LOC105430690)	Pogonomyrmex barbatus	GO:0006695~cholesterol biosynthetic process,GO:0008299~isoprenoid biosynthetic process,GO:0019287~isopentenyl diphosphate biosynthetic process, mevalonate pathway,	GO:0005737~cytoplasm,GO:0005829~cytosol,	GO:0004496~mevalonate kinase activity,GO:0005524~ATP binding,
LOC105431080	uncharacterized LOC105431080(LOC105431080)	Pogonomyrmex barbatus		GO:0016020~membrane,
LOC105431081	uncharacterized LOC105431081(LOC105431081)	Pogonomyrmex barbatus		GO:0016020~membrane,
LOC105431217	uncharacterized LOC105431217(LOC105431217)	Pogonomyrmex barbatus		GO:0016020~membrane,	GO:0016491~oxidoreductase activity,
LOC105431257	uncharacterized LOC105431257(LOC105431257)	Pogonomyrmex barbatus		GO:0016020~membrane,
LOC105431259	uncharacterized LOC105431259(LOC105431259)	Pogonomyrmex barbatus		GO:0016020~membrane,
LOC105431514	uncharacterized LOC105431514(LOC105431514)	Pogonomyrmex barbatus			GO:0042302~structural constituent of cuticle,
LOC105431873	uncharacterized LOC105431873(LOC105431873)	Pogonomyrmex barbatus	GO:0031144~proteasome localization,GO:0071630~nuclear protein quality control by the ubiquitin-proteasome system,	GO:0005634~nucleus,GO:0031965~nuclear membrane,	GO:0070628~proteasome binding,
LOC105432033	uncharacterized LOC105432033(LOC105432033)	Pogonomyrmex barbatus	GO:0007165~signal transduction,GO:0007608~sensory perception of smell,GO:0050911~detection of chemical stimulus involved in sensory perception of smell,	GO:0005886~plasma membrane,	GO:0004984~olfactory receptor activity,GO:0005549~odorant binding,
LOC105432048	uncharacterized LOC105432048(LOC105432048)	Pogonomyrmex barbatus		GO:0016020~membrane,
LOC105432126	uncharacterized LOC105432126(LOC105432126)	Pogonomyrmex barbatus		GO:0005737~cytoplasm,GO:0005856~cytoskeleton,GO:0005929~cilium,
LOC105432141	uncharacterized LOC105432141(LOC105432141)	Pogonomyrmex barbatus		GO:0062129~chitin-based extracellular matrix,	GO:0008010~structural constituent of chitin-based larval cuticle,
LOC105432170	uncharacterized LOC105432170(LOC105432170)	Pogonomyrmex barbatus		GO:0016020~membrane,
LOC105432171	uncharacterized LOC105432171(LOC105432171)	Pogonomyrmex barbatus		GO:0016020~membrane,
LOC105432195	uncharacterized LOC105432195(LOC105432195)	Pogonomyrmex barbatus		GO:0016020~membrane,
LOC105432196	uncharacterized LOC105432196(LOC105432196)	Pogonomyrmex barbatus		GO:0016020~membrane,
LOC105432283	uncharacterized LOC105432283(LOC105432283)	Pogonomyrmex barbatus		GO:0016020~membrane,
LOC105432389	uncharacterized LOC105432389(LOC105432389)	Pogonomyrmex barbatus	GO:0051493~regulation of cytoskeleton organization,	GO:0005930~axoneme,GO:0016020~membrane,	GO:0008017~microtubule binding,
LOC105432533	uncharacterized LOC105432533(LOC105432533)	Pogonomyrmex barbatus		GO:0016020~membrane,
LOC105432559	uncharacterized LOC105432559(LOC105432559)	Pogonomyrmex barbatus		GO:0005737~cytoplasm,	GO:0061630~ubiquitin protein ligase activity,
LOC105432662	uncharacterized LOC105432662(LOC105432662)	Pogonomyrmex barbatus		GO:0016020~membrane,
LOC105432824	uncharacterized LOC105432824(LOC105432824)	Pogonomyrmex barbatus		GO:0016020~membrane,
LOC105432839	uncharacterized LOC105432839(LOC105432839)	Pogonomyrmex barbatus	GO:0007275~multicellular organism development,GO:0043161~proteasome-mediated ubiquitin-dependent protein catabolic process,	GO:0005737~cytoplasm,	GO:0031624~ubiquitin conjugating enzyme binding,GO:0061630~ubiquitin protein ligase activity,
LOC105432868	uncharacterized LOC105432868(LOC105432868)	Pogonomyrmex barbatus	GO:0006368~transcription elongation by RNA polymerase II,	GO:0030891~VCB complex,GO:0070449~elongin complex,		pbar04120:Ubiquitin mediated proteolysis,
LOC105433102	uncharacterized LOC105433102(LOC105433102)	Pogonomyrmex barbatus	GO:0006695~cholesterol biosynthetic process,GO:0008299~isoprenoid biosynthetic process,GO:0019287~isopentenyl diphosphate biosynthetic process, mevalonate pathway,	GO:0005737~cytoplasm,GO:0005829~cytosol,	GO:0004496~mevalonate kinase activity,GO:0005524~ATP binding,
LOC105433119	uncharacterized LOC105433119(LOC105433119)	Pogonomyrmex barbatus	GO:0006506~GPI anchor biosynthetic process,	GO:0005789~endoplasmic reticulum membrane,		pbar00563:Glycosylphosphatidylinositol (GPI)-anchor biosynthesis,pbar01100:Metabolic pathways,
LOC105433329	uncharacterized LOC105433329(LOC105433329)	Pogonomyrmex barbatus			GO:0005515~protein binding,
LOC105433438	uncharacterized LOC105433438(LOC105433438)	Pogonomyrmex barbatus			GO:0016491~oxidoreductase activity,
LOC105433442	uncharacterized LOC105433442(LOC105433442)	Pogonomyrmex barbatus			GO:0016491~oxidoreductase activity,
LOC105433466	uncharacterized LOC105433466(LOC105433466)	Pogonomyrmex barbatus	GO:0008156~negative regulation of DNA replication,GO:0045786~negative regulation of cell cycle,	GO:0005634~nucleus,
LOC105433522	uncharacterized LOC105433522(LOC105433522)	Pogonomyrmex barbatus	GO:0051225~spindle assembly,	GO:0070652~HAUS complex,GO:1990498~mitotic spindle microtubule,	GO:0008017~microtubule binding,
LOC105433592	uncharacterized LOC105433592(LOC105433592)	Pogonomyrmex barbatus		GO:0005654~nucleoplasm,
LOC105433754	uncharacterized LOC105433754(LOC105433754)	Pogonomyrmex barbatus	GO:0006334~nucleosome assembly,	GO:0000786~nucleosome,	GO:0003677~DNA binding,
LOC105433760	uncharacterized LOC105433760(LOC105433760)	Pogonomyrmex barbatus	GO:0003341~cilium movement,GO:0060271~cilium assembly,	GO:0031514~motile cilium,GO:0070062~extracellular exosome,	GO:0005515~protein binding,
LOC105433790	uncharacterized LOC105433790(LOC105433790)	Pogonomyrmex barbatus		GO:0016020~membrane,
LOC105434314	uncharacterized LOC105434314(LOC105434314)	Pogonomyrmex barbatus		GO:0031314~extrinsic component of mitochondrial inner membrane,	GO:0046872~metal ion binding,
LOC112552571	uncharacterized LOC112552571(LOC112552571)	Pogonomyrmex barbatus	GO:0030488~tRNA methylation,		GO:0016423~tRNA (guanine) methyltransferase activity,
LOC112552658	uncharacterized LOC112552658(LOC112552658)	Pogonomyrmex barbatus	GO:0007165~signal transduction,GO:0007608~sensory perception of smell,	GO:0016020~membrane,	GO:0004984~olfactory receptor activity,GO:0005549~odorant binding,
LOC112552797	uncharacterized LOC112552797(LOC112552797)	Pogonomyrmex barbatus	GO:0007165~signal transduction,GO:0007608~sensory perception of smell,	GO:0016020~membrane,	GO:0004984~olfactory receptor activity,GO:0005549~odorant binding,
LOC112553048	uncharacterized LOC112553048(LOC112553048)	Pogonomyrmex barbatus		GO:0016020~membrane,	GO:0016491~oxidoreductase activity,
LOC105428185	unconventional myosin-XIX-like(LOC105428185)	Pogonomyrmex barbatus	GO:0007015~actin filament organization,GO:0030050~vesicle transport along actin filament,	GO:0005737~cytoplasm,GO:0015629~actin cytoskeleton,GO:0016020~membrane,GO:0016459~myosin complex,GO:0031982~vesicle,	GO:0000146~microfilament motor activity,GO:0005524~ATP binding,GO:0051015~actin filament binding,	pbar04814:Motor proteins,
LOC105429087	urea transporter 1-like(LOC105429087)	Pogonomyrmex barbatus	GO:0071918~urea transmembrane transport,	GO:0005886~plasma membrane,GO:0016020~membrane,	GO:0015204~urea transmembrane transporter activity,
LOC105426144	venom acid phosphatase Acph-1-like(LOC105426144)	Pogonomyrmex barbatus	GO:0016311~dephosphorylation,		GO:0016791~phosphatase activity,
LOC105431591	venom acid phosphatase Acph-1-like(LOC105431591)	Pogonomyrmex barbatus	GO:0016311~dephosphorylation,		GO:0016791~phosphatase activity,
LOC105425395	vitellogenin(Vg)	Pogonomyrmex barbatus	GO:0006869~lipid transport,		GO:0005319~lipid transporter activity,
LOC105422858	voltage-dependent L-type calcium channel subunit beta-2(LOC105422858)	Pogonomyrmex barbatus	GO:0007268~chemical synaptic transmission,GO:0007528~neuromuscular junction development,GO:0070588~calcium ion transmembrane transport,GO:1901385~regulation of voltage-gated calcium channel activity,	GO:0005891~voltage-gated calcium channel complex,	GO:0005245~voltage-gated calcium channel activity,GO:0005515~protein binding,GO:0008331~high voltage-gated calcium channel activity,
LOC112552328	voltage-dependent anion-selective channel protein 2-like(LOC112552328)	Pogonomyrmex barbatus	GO:0055085~transmembrane transport,	GO:0005741~mitochondrial outer membrane,GO:0046930~pore complex,	GO:0015288~porin activity,
LOC105428843	xanthine dehydrogenase 1-like(LOC105428843)	Pogonomyrmex barbatus		GO:0005777~peroxisome,	GO:0005506~iron ion binding,GO:0016491~oxidoreductase activity,GO:0051537~2 iron, 2 sulfur cluster binding,GO:0071949~FAD binding,	pbar00230:Purine metabolism,pbar00232:Caffeine metabolism,pbar00983:Drug metabolism - other enzymes,pbar01100:Metabolic pathways,pbar01232:Nucleotide metabolism,pbar04146:Peroxisome,
LOC105434254	zinc carboxypeptidase A 1-like(LOC105434254)	Pogonomyrmex barbatus	GO:0006508~proteolysis,	GO:0005615~extracellular space,	GO:0004181~metallocarboxypeptidase activity,GO:0008270~zinc ion binding,
LOC105434215	zinc carboxypeptidase-like(LOC105434215)	Pogonomyrmex barbatus	GO:0006508~proteolysis,	GO:0005615~extracellular space,	GO:0004181~metallocarboxypeptidase activity,GO:0008270~zinc ion binding,
LOC105434253	zinc carboxypeptidase-like(LOC105434253)	Pogonomyrmex barbatus	GO:0006508~proteolysis,	GO:0005615~extracellular space,	GO:0004181~metallocarboxypeptidase activity,GO:0008270~zinc ion binding,
LOC105431283	zinc finger CCCH domain-containing protein 13(LOC105431283)	Pogonomyrmex barbatus		GO:0005576~extracellular region,	GO:0008061~chitin binding,
LOC105424838	zinc finger protein 239-like(LOC105424838)	Pogonomyrmex barbatus	GO:0006355~regulation of DNA-templated transcription,		GO:0000978~RNA polymerase II cis-regulatory region sequence-specific DNA binding,GO:0000981~DNA-binding transcription factor activity, RNA polymerase II-specific,
LOC105425658	zinc finger protein 346-like(LOC105425658)	Pogonomyrmex barbatus		GO:0005634~nucleus,	GO:0003676~nucleic acid binding,GO:0008270~zinc ion binding,
LOC105427317	zinc finger protein 394-like(LOC105427317)	Pogonomyrmex barbatus	GO:0006357~regulation of transcription by RNA polymerase II,		GO:0000978~RNA polymerase II cis-regulatory region sequence-specific DNA binding,GO:0000981~DNA-binding transcription factor activity, RNA polymerase II-specific,
LOC105426649	zinc finger protein 540-like(LOC105426649)	Pogonomyrmex barbatus	GO:0006357~regulation of transcription by RNA polymerase II,	GO:0005634~nucleus,	GO:0000977~RNA polymerase II transcription regulatory region sequence-specific DNA binding,GO:0000981~DNA-binding transcription factor activity, RNA polymerase II-specific,GO:0046872~metal ion binding,
LOC105423056	zinc finger protein 622(LOC105423056)	Pogonomyrmex barbatus	GO:0042273~ribosomal large subunit biogenesis,	GO:0030687~preribosome, large subunit precursor,	GO:0046872~metal ion binding,
LOC105422580	zinc finger protein 84-like(LOC105422580)	Pogonomyrmex barbatus	GO:0006357~regulation of transcription by RNA polymerase II,	GO:0005634~nucleus,	GO:0000977~RNA polymerase II transcription regulatory region sequence-specific DNA binding,GO:0000981~DNA-binding transcription factor activity, RNA polymerase II-specific,GO:0046872~metal ion binding,
LOC105427826	zinc-ribbon metal-binding protein lunapark(Lnpk)	Pogonomyrmex barbatus	GO:0071786~endoplasmic reticulum tubular network organization,GO:0071788~endoplasmic reticulum tubular network maintenance,GO:1903373~positive regulation of endoplasmic reticulum tubular network organization,	GO:0071782~endoplasmic reticulum tubular network,GO:0098826~endoplasmic reticulum tubular network membrane,	GO:0046872~metal ion binding,

## Sheet: DO Functional Annotation Chart
Category	Term	Count	%	PValue	Genes	List Total	Pop Hits	Pop Total	Fold Enrichment	Bonferroni	Benjamini	FDR
GOTERM_CC_DIRECT	GO:0016020~membrane	272	23.8179	3.11542e-22	LOC105423019, LOC105428829, LOC105422848, LOC105426761, LOC105426523, LOC105428944, LOC105430596, LOC105428020, LOC105433741, LOC105431320, LOC105431560, LOC105432776, LOC105432534, LOC105423704, LOC105426531, LOC105429005, LOC105422178, LOC105425566, LOC105429920, LOC105426656, LOC105425325, LOC105431552, LOC105433852, LOC105428153, LOC105431310, LOC105432762, LOC105432882, LOC105428036, LOC1054…	727	1868	8362	1.67482	5.14044e-20	5.14044e-20	4.92236e-20
GOTERM_CC_DIRECT	GO:0005886~plasma membrane	172	15.0613	2.16064e-14	LOC105427456, LOC105428149, LOC105426761, LOC105424465, LOC105429517, LOC105421991, LOC105426369, LOC105432498, LOC105428141, LOC105432012, LOC105433223, LOC105433188, LOC105433342, LOC105430632, LOC105432932, LOC105427170, LOC105427902, LOC105431948, LOC105424198, LOC105428314, LOC105428313, LOC105424476, LOC105423144, LOC105423303, LOC105429645, LOC105425566, LOC105422610, LOC105428437, LOC1054…	727	1139	8362	1.73692	3.57214e-12	1.78252e-12	1.7069e-12
GOTERM_MF_DIRECT	GO:0020037~heme binding	39	3.41506	2.20842e-12	LOC105424965, LOC105430828, LOC105432905, LOC105423297, LOC105428887, LOC105425851, LOC105427553, LOC105424962, LOC105422047, LOC105422720, LOC105424963, LOC105429210, LOC105429277, LOC105430032, LOC105433322, LOC105432253, LOC105428222, LOC105432372, LOC105433803, LOC105430810, LOC105430734, LOC105430811, LOC105433109, LOC105430756, LOC105423704, LOC105426511, LOC112552780, LOC105427009, LOC1054…	739	116	7798	3.54769	1.04018e-09	1.04016e-09	1.02691e-09
GOTERM_BP_DIRECT	GO:0055085~transmembrane transport	48	4.20315	9.42438e-12	LOC105424823, LOC105422788, LOC105424789, LOC105422824, LOC105424661, LOC105425851, LOC105426761, LOC105429517, LOC105428922, LOC105429696, LOC105432276, LOC105433783, LOC105425098, LOC105428761, LOC105433408, LOC105431924, LOC112552639, LOC105431944, LOC105429095, LOC105431567, LOC105430498, LOC105422216, LOC105422910, LOC105425703, LOC105423729, LOC105423409, LOC105427402, LOC105425102, LOC1054…	609	194	7288	2.96095	4.62736e-09	4.61794e-09	4.45773e-09
KEGG_PATHWAY	pbar01100:Metabolic pathways	130	11.3835	1.09719e-11	LOC105424989, LOC105429879, LOC105430071, LOC105429758, LOC105426762, LOC105430596, LOC105433983, LOC105428020, LOC105429992, LOC105433741, LOC105431443, LOC105428141, LOC105434157, LOC105431049, LOC105431841, LOC105434315, LOC105425604, LOC105429924, LOC105429368, LOC105422299, LOC105428957, LOC105429643, LOC105424996, LOC105431156, LOC105430221, LOC105432762, LOC105431276, LOC105431151, LOC1054…	248	989	3061	1.6224	1.22885e-09	1.23983e-09	1.19594e-09
GOTERM_CC_DIRECT	GO:0043005~neuron projection	28	2.45184	1.28145e-10	LOC105423019, LOC105426901, LOC105423658, LOC105434174, LOC105427135, LOC105425651, LOC105426440, LOC105426143, LOC105433768, LOC105426958, LOC105426716, LOC105422178, LOC105425049, LOC105431530, LOC105428153, LOC105428791, LOC105428790, LOC105432882, LOC105423180, LOC105433376, LOC105434122, LOC105425044, LOC105430282, LOC105423580, LOC105429082, LOC105432987, LOC105432986, LOC105433259	727	78	8362	4.12895	2.11439e-08	7.04795e-09	6.74895e-09
GOTERM_MF_DIRECT	GO:0016705~oxidoreductase activity, acting on paired donors, with incorporation or reduction of molecular oxygen	27	2.36427	2.42739e-09	LOC105424965, LOC105430828, LOC105423297, LOC105428887, LOC105427553, LOC105424962, LOC105424963, LOC105429210, LOC105429277, LOC105430032, LOC105432253, LOC105428222, LOC105432372, LOC105430810, LOC105430811, LOC105433109, LOC105426511, LOC112552780, LOC105427009, LOC105429689, LOC105425380, LOC105433950, LOC105428432, LOC105428671, LOC105433999, LOC105430344, LOC105433952	739	76	7798	3.74877	1.1433e-06	5.71651e-07	5.64369e-07
GOTERM_BP_DIRECT	GO:1902600~proton transmembrane transport	15	1.31349	2.57266e-09	LOC105426637, LOC105426346, LOC105428314, LOC105429758, LOC105428313, LOC105428957, LOC105428407, LOC105426996, LOC105423247, LOC105430221, LOC105430086, LOC112552188, LOC105433923, LOC105431359, LOC105430950	609	26	7288	6.90413	1.26318e-06	6.30303e-07	6.08435e-07
GOTERM_MF_DIRECT	GO:0004497~monooxygenase activity	28	2.45184	5.68643e-09	LOC105424965, LOC105430828, LOC105423297, LOC105428887, LOC105428522, LOC105427553, LOC105424962, LOC105424963, LOC105429210, LOC105429277, LOC105430032, LOC105432253, LOC105428222, LOC105432372, LOC105430810, LOC105430811, LOC105433109, LOC105426511, LOC112552780, LOC105427009, LOC105429689, LOC105425380, LOC105433950, LOC105428432, LOC105428671, LOC105433999, LOC105430344, LOC105433952	739	84	7798	3.51737	2.6783e-06	8.92769e-07	8.81396e-07
GOTERM_MF_DIRECT	GO:0005506~iron ion binding	33	2.88967	9.65961e-09	LOC105424965, LOC105427419, LOC105430828, LOC105423297, LOC105428887, LOC105427511, LOC105427553, LOC105424962, LOC105424963, LOC105429210, LOC105427350, LOC105429277, LOC105430032, LOC105432253, LOC105428222, LOC105432372, LOC105430810, LOC105430811, LOC105433109, LOC105423704, LOC105426511, LOC112552780, LOC105427009, LOC105429689, LOC105425380, LOC105433950, LOC105428432, LOC105430282, LOC1054…	739	114	7798	3.05455	4.54967e-06	1.13742e-06	1.12293e-06
GOTERM_BP_DIRECT	GO:0007186~G protein-coupled receptor signaling pathway	25	2.18914	1.16286e-08	LOC105428741, LOC105428587, LOC105425512, LOC105433223, LOC105432776, LOC105430872, LOC105427928, LOC105434284, LOC105425147, LOC105425566, LOC105426876, LOC105431310, LOC105426590, LOC105433795, LOC105432882, LOC105427381, LOC105423260, LOC105424371, LOC105425044, LOC105427462, LOC105428770, LOC105433570, LOC105430029, LOC105431699, LOC105432986	609	79	7288	3.78708	5.70965e-06	1.89934e-06	1.83345e-06
KEGG_PATHWAY	pbar04080:Neuroactive ligand-receptor interaction	23	2.01401	1.23151e-08	LOC105423658, LOC105427928, LOC105427765, LOC105428149, LOC105428587, LOC105428741, LOC105429225, LOC105426305, LOC105425512, LOC105426876, LOC105428437, LOC105427381, LOC105423260, LOC105424371, LOC105434122, LOC105427462, LOC105428770, LOC105430029, LOC105430942, LOC105430696, LOC105432456, LOC105430872, LOC105433259	248	71	3061	3.99835	1.3793e-06	6.95806e-07	6.71176e-07
GOTERM_CC_DIRECT	GO:0005615~extracellular space	58	5.07881	1.1158e-07	LOC105425834, LOC105423218, LOC105423814, LOC105425554, LOC105422047, LOC105428626, LOC105432135, LOC105432498, LOC105423690, LOC105424383, LOC105430437, LOC105434118, LOC105431049, LOC105422899, LOC105423306, LOC105423946, LOC105431749, LOC105432959, LOC105424551, LOC105426134, LOC105426454, LOC105422178, LOC105427703, LOC105429005, LOC105422179, LOC105422610, LOC105434145, LOC105433450, LOC1054…	727	322	8362	2.0718	1.84105e-05	4.60268e-06	4.40741e-06
GOTERM_MF_DIRECT	GO:0046961~proton-transporting ATPase activity, rotational mechanism	11	0.963222	5.70303e-07	LOC105430221, LOC105426637, LOC105430086, LOC105426346, LOC105429758, LOC105428957, LOC105428407, LOC105431359, LOC105426996, LOC105423247, LOC105430950	739	17	7798	6.82783	0.000268577	5.37226e-05	5.30382e-05
KEGG_PATHWAY	pbar04081:Hormone signaling	16	1.40105	5.95723e-06	LOC105431709, LOC105432905, LOC105427928, LOC105434284, LOC105433193, LOC105428741, LOC105427823, LOC105428437, LOC105432563, LOC105427381, LOC105427193, LOC105425253, LOC105428770, LOC105431944, LOC105430765, LOC105432456	248	51	3061	3.87223	0.000666989	0.000224389	0.000216446
GOTERM_BP_DIRECT	GO:0050808~synapse organization	11	0.963222	1.01319e-05	LOC105430254, LOC105428483, LOC105430661, LOC105428057, LOC105427809, LOC105424892, LOC112552727, LOC105428797, LOC105425651, LOC105424865, LOC105432611	609	24	7288	5.48495	0.00496245	0.00124116	0.0011981
GOTERM_CC_DIRECT	GO:0032589~neuron projection membrane	10	0.875657	1.86441e-05	LOC105430254, LOC105428483, LOC105430661, LOC105428057, LOC105427809, LOC105424892, LOC112552727, LOC105428797, LOC105424865, LOC105432611	727	20	8362	5.75103	0.00307159	0.000615257	0.000589155
GOTERM_BP_DIRECT	GO:0007156~homophilic cell adhesion via plasma membrane adhesion molecules	12	1.05079	2.23833e-05	LOC105432155, LOC105422932, LOC105428036, LOC105427456, LOC105424476, LOC105422484, LOC105429061, LOC105425651, LOC105421991, LOC105425269, LOC105424303, LOC105422610	609	31	7288	4.63245	0.0109302	0.00219357	0.00211746
GOTERM_CC_DIRECT	GO:0005576~extracellular region	42	3.67776	2.59628e-05	LOC105427817, LOC105423812, LOC105429339, LOC105424487, LOC105428027, LOC105424245, LOC105426167, LOC105425755, LOC105429656, LOC105425115, LOC105433489, LOC105429695, LOC105432430, LOC105432431, LOC105433122, LOC105428982, LOC105433629, LOC105433968, LOC105431548, LOC105433402, LOC105424879, LOC105424551, LOC105433194, LOC105423285, LOC105428534, LOC105429643, LOC105427703, LOC105424235, LOC1054…	727	244	8362	1.97986	0.00427476	0.000713978	0.000683688
GOTERM_MF_DIRECT	GO:0015171~amino acid transmembrane transporter activity	9	0.788091	6.93362e-05	LOC105425308, LOC105425307, LOC105431032, LOC105432738, LOC105424661, LOC105430208, LOC105434061, LOC105424676, LOC105434070	739	17	7798	5.5864	0.0321309	0.00544289	0.00537355
KEGG_PATHWAY	pbar04145:Phagosome	16	1.40105	0.000114055	LOC105426637, LOC105432905, LOC105430092, LOC105426346, LOC105429758, LOC105428957, LOC105428407, LOC105427404, LOC105426996, LOC105423247, LOC105430221, LOC105430086, LOC105431065, LOC105428683, LOC105431359, LOC105430950	248	64	3061	3.08569	0.0126936	0.00322206	0.003108
GOTERM_MF_DIRECT	GO:0004930~G protein-coupled receptor activity	18	1.57618	0.000117759	LOC105427928, LOC105427765, LOC105428587, LOC105425566, LOC105426876, LOC105431310, LOC105426590, LOC105433223, LOC105432882, LOC105427381, LOC105423260, LOC105424371, LOC105425044, LOC105433570, LOC105431699, LOC105432437, LOC105432776, LOC105432456	739	67	7798	2.83489	0.0539574	0.00792348	0.00782255
GOTERM_BP_DIRECT	GO:0006865~amino acid transport	6	0.525394	0.000179948	LOC105431032, LOC105433130, LOC105424661, LOC105430208, LOC105434061, LOC105424676	609	8	7288	8.97537	0.0845711	0.0137713	0.0132935
GOTERM_CC_DIRECT	GO:0043235~receptor complex	11	0.963222	0.000187721	LOC105422090, LOC105431671, LOC105432340, LOC105425784, LOC105424694, LOC105427565, LOC105424465, LOC105422001, LOC105430269, LOC105430302, LOC105424018	727	31	8362	4.08138	0.030502	0.00442485	0.00423713
GOTERM_BP_DIRECT	GO:0007035~vacuolar acidification	5	0.437828	0.000224081	LOC105430221, LOC105426637, LOC105429729, LOC105430086, LOC105430950	609	5	7288	11.9672	0.104198	0.0137713	0.0132935
GOTERM_BP_DIRECT	GO:0007275~multicellular organism development	13	1.13835	0.000224838	LOC105424694, LOC105427565, LOC105424465, LOC105422001, LOC105421991, LOC105424018, LOC105422610, LOC105422090, LOC105432340, LOC105427782, LOC105433968, LOC105430269, LOC105430302	609	45	7288	3.45718	0.104531	0.0137713	0.0132935
GOTERM_BP_DIRECT	GO:0007268~chemical synaptic transmission	13	1.13835	0.000349923	LOC105423019, LOC105426901, LOC105423658, LOC105428149, LOC105431530, LOC105428153, LOC105431320, LOC105434122, LOC112552639, LOC105430942, LOC105433768, LOC105431455, LOC105433259	609	47	7288	3.31007	0.157888	0.0172036	0.0166068
GOTERM_BP_DIRECT	GO:0033674~positive regulation of kinase activity	9	0.788091	0.000354912	LOC105422090, LOC105432340, LOC105424694, LOC105427565, LOC105424465, LOC105422001, LOC105430269, LOC105430302, LOC105424018	609	23	7288	4.6828	0.159949	0.0172036	0.0166068
GOTERM_BP_DIRECT	GO:0016042~lipid catabolic process	12	1.05079	0.000386204	LOC105432135, LOC105433840, LOC105432393, LOC105433450, LOC105431749, LOC105434284, LOC105425147, LOC105433837, LOC105429643, LOC105433812, LOC105429656, LOC105431049	609	41	7288	3.50258	0.172762	0.0172036	0.0166068
GOTERM_CC_DIRECT	GO:0045202~synapse	16	1.40105	0.000586417	LOC105423019, LOC105422932, LOC105426901, LOC105423658, LOC105428149, LOC105427135, LOC105429920, LOC105431530, LOC105428153, LOC105431320, LOC105430074, LOC105434122, LOC105430942, LOC105433768, LOC105431455, LOC105433259	727	68	8362	2.70637	0.0922508	0.0120948	0.0115817
GOTERM_BP_DIRECT	GO:0007169~cell surface receptor protein tyrosine kinase signaling pathway	10	0.875657	0.000697137	LOC105422090, LOC105432340, LOC105425784, LOC105424694, LOC105427565, LOC105424465, LOC105422001, LOC105430269, LOC105430302, LOC105424018	609	31	7288	3.86037	0.289946	0.0284664	0.0274788
GOTERM_BP_DIRECT	GO:0005975~carbohydrate metabolic process	16	1.40105	0.00097674	LOC105427817, LOC105426307, LOC105425911, LOC105424837, LOC105431936, LOC105422383, LOC105428643, LOC105427037, LOC105428642, LOC112552182, LOC105426955, LOC105429993, LOC105433122, LOC105428179, LOC105432592, LOC105428191	609	74	7288	2.58749	0.381101	0.0368156	0.0355383
GOTERM_MF_DIRECT	GO:0022857~transmembrane transporter activity	18	1.57618	0.00109881	LOC105422788, LOC105422824, LOC105423729, LOC105427402, LOC105426761, LOC105426531, LOC105424178, LOC105425282, LOC105432276, LOC105425098, LOC105428761, LOC105429086, LOC105432727, LOC105431924, LOC105431338, LOC105431944, LOC105429095, LOC105430498	739	80	7798	2.37422	0.404185	0.0646925	0.0638684
GOTERM_BP_DIRECT	GO:0042391~regulation of membrane potential	10	0.875657	0.0014463	LOC105428153, LOC105431530, LOC105423019, LOC105426901, LOC105423658, LOC105434122, LOC105426324, LOC105433768, LOC105433558, LOC105433259	609	34	7288	3.51975	0.508673	0.0506204	0.0488642
GOTERM_BP_DIRECT	GO:0006869~lipid transport	10	0.875657	0.00180569	LOC105423327, LOC105431552, LOC105428937, LOC105423329, LOC105423328, LOC105427605, LOC105425471, LOC105423409, LOC105423330, LOC105423332	609	35	7288	3.41919	0.588274	0.0560113	0.0540681
GOTERM_BP_DIRECT	GO:0035336~long-chain fatty-acyl-CoA metabolic process	7	0.61296	0.00182894	LOC105425825, LOC105427816, LOC105434203, LOC105425816, LOC112553041, LOC105425809, LOC105426723	609	17	7288	4.92765	0.592955	0.0560113	0.0540681
GOTERM_BP_DIRECT	GO:0006629~lipid metabolic process	11	0.963222	0.00231858	LOC105432135, LOC105432268, LOC105433840, LOC105428937, LOC105433450, LOC105431749, LOC105425147, LOC105433837, LOC105431679, LOC105433416, LOC105431049	609	43	7288	3.06137	0.680099	0.0659292	0.0636419
GOTERM_CC_DIRECT	GO:0016471~vacuolar proton-transporting V-type ATPase complex	4	0.350263	0.00243877	LOC105430221, LOC105426637, LOC105431359, LOC105430950	727	4	8362	11.5021	0.331613	0.0447107	0.0428139
GOTERM_BP_DIRECT	GO:0050767~regulation of neurogenesis	5	0.437828	0.00255644	LOC105434237, LOC105423273, LOC105434242, LOC105434241, LOC105424238	609	8	7288	7.47947	0.715442	0.0659292	0.0636419
GOTERM_BP_DIRECT	GO:0006094~gluconeogenesis	5	0.437828	0.00255644	LOC105434157, LOC105426301, LOC105434273, LOC105429368, LOC105422246	609	8	7288	7.47947	0.715442	0.0659292	0.0636419
GOTERM_MF_DIRECT	GO:0038023~signaling receptor activity	9	0.788091	0.00346053	LOC105431320, LOC105434122, LOC105430209, LOC105422629, LOC105425784, LOC105429225, LOC105432932, LOC105433547, LOC105431455	739	28	7798	3.39175	0.804606	0.181101	0.178794
GOTERM_BP_DIRECT	GO:0007411~axon guidance	9	0.788091	0.00389089	LOC105422932, LOC105433881, LOC105433342, LOC105428036, LOC105422384, LOC105427456, LOC105422484, LOC105427713, LOC105425269	609	32	7288	3.36576	0.852533	0.0953267	0.0920195
GOTERM_BP_DIRECT	GO:0030154~cell differentiation	20	1.75131	0.00426925	LOC105422932, LOC105422979, LOC105433949, LOC105425751, LOC105427456, LOC105422384, LOC105423285, LOC105422242, LOC105424304, LOC105422610, LOC105433445, LOC105434237, LOC105428036, LOC105433342, LOC105426210, LOC105433153, LOC105434242, LOC105434241, LOC105432690, LOC105433629	609	119	7288	2.01129	0.877628	0.0996159	0.0961599
GOTERM_CC_DIRECT	GO:0045211~postsynaptic membrane	12	1.05079	0.00434721	LOC105431530, LOC105422766, LOC105432882, LOC105426901, LOC105431320, LOC105423658, LOC105434122, LOC105425044, LOC105432271, LOC105429225, LOC105431455, LOC105433259	727	52	8362	2.65432	0.512689	0.0717289	0.0686859
GOTERM_MF_DIRECT	GO:0008028~monocarboxylic acid transmembrane transporter activity	6	0.525394	0.00505241	LOC105424823, LOC105433256, LOC105434125, LOC105432276, LOC105433255, LOC105431944	739	13	7798	4.8702	0.907977	0.237969	0.234937
KEGG_PATHWAY	pbar00564:Glycerophospholipid metabolism	12	1.05079	0.00565785	LOC105432762, LOC105428141, LOC105429993, LOC105430407, LOC105425367, LOC105427135, LOC105426454, LOC105432390, LOC105429643, LOC105434192, LOC105433812, LOC105429656	248	58	3061	2.55367	0.470318	0.127867	0.123341
GOTERM_BP_DIRECT	GO:0006182~cGMP biosynthetic process	5	0.437828	0.00669808	LOC105430561, LOC105426664, LOC105433193, LOC105432007, LOC105432005	609	10	7288	5.98358	0.96311	0.149184	0.144009
GOTERM_CC_DIRECT	GO:0030424~axon	12	1.05079	0.00678639	LOC105422766, LOC105422932, LOC105429697, LOC105433342, LOC105428036, LOC105422384, LOC105427456, LOC105422484, LOC105425651, LOC105424018, LOC105425269, LOC105427920	727	55	8362	2.50954	0.674883	0.101796	0.0974772
GOTERM_MF_DIRECT	GO:0004714~transmembrane receptor protein tyrosine kinase activity	6	0.525394	0.00725546	LOC105422090, LOC105432340, LOC105424694, LOC105427565, LOC105424465, LOC105422001	739	14	7798	4.52233	0.967606	0.284777	0.281149
GOTERM_MF_DIRECT	GO:0004016~adenylate cyclase activity	6	0.525394	0.00725546	LOC105430561, LOC105425253, LOC105426664, LOC105433193, LOC105430765, LOC105427823	739	14	7798	4.52233	0.967606	0.284777	0.281149
GOTERM_BP_DIRECT	GO:0071805~potassium ion transmembrane transport	7	0.61296	0.00769698	LOC105422766, LOC105433652, LOC105433055, LOC105434174, LOC105426324, LOC105432513, LOC105433677	609	22	7288	3.80773	0.977491	0.163065	0.157407
KEGG_PATHWAY	pbar00561:Glycerolipid metabolism	9	0.788091	0.00789384	LOC105428141, LOC105428442, LOC105428232, LOC105431749, LOC105430407, LOC105434192, LOC105422883, LOC105425401, LOC105431049	248	37	3061	3.00229	0.588365	0.148667	0.143405
GOTERM_BP_DIRECT	GO:1902476~chloride transmembrane transport	6	0.525394	0.00798684	LOC105428153, LOC105422007, LOC105427903, LOC105423658, LOC105424198, LOC105433768	609	16	7288	4.48768	0.980499	0.163065	0.157407
GOTERM_BP_DIRECT	GO:0006107~oxaloacetate metabolic process	4	0.350263	0.00953973	LOC105434157, LOC105427342, LOC105426301, LOC105434273	609	6	7288	7.97811	0.990964	0.183921	0.17754
GOTERM_BP_DIRECT	GO:0070593~dendrite self-avoidance	5	0.437828	0.00983973	LOC105422932, LOC105428036, LOC105427456, LOC105422484, LOC105425269	609	11	7288	5.43962	0.992212	0.183921	0.17754
GOTERM_BP_DIRECT	GO:0035725~sodium ion transmembrane transport	8	0.700525	0.0101344	LOC105422007, LOC105427903, LOC105423180, LOC105433376, LOC105433130, LOC105432319, LOC105423431, LOC105426369	609	30	7288	3.19124	0.993271	0.183921	0.17754
GOTERM_MF_DIRECT	GO:0080019~alcohol-forming very long-chain fatty acyl-CoA reductase activity	6	0.525394	0.0135003	LOC105425825, LOC105427816, LOC105434203, LOC105425816, LOC112553041, LOC105425809	739	16	7798	3.95704	0.998342	0.423024	0.417636
KEGG_PATHWAY	pbar04624:Toll and Imd signaling pathway	10	0.875657	0.014677	LOC105431552, LOC105424726, LOC105430495, LOC105434145, LOC105432220, LOC105422097, LOC105423473, LOC105431726, LOC105425662, LOC105433547	248	49	3061	2.51893	0.8091	0.236929	0.228542
GOTERM_BP_DIRECT	GO:0050877~nervous system process	7	0.61296	0.0147497	LOC105428153, LOC105431530, LOC105423019, LOC105426901, LOC105423658, LOC105433768, LOC105433259	609	25	7288	3.3508	0.999322	0.235339	0.227174
GOTERM_MF_DIRECT	GO:0004383~guanylate cyclase activity	5	0.437828	0.0152755	LOC105430561, LOC105426664, LOC105433193, LOC105432007, LOC105432005	739	11	7798	4.79641	0.99929	0.423024	0.417636
GOTERM_MF_DIRECT	GO:0098632~cell-cell adhesion mediator activity	5	0.437828	0.0152755	LOC105422932, LOC105428036, LOC105427456, LOC105422484, LOC105425269	739	11	7798	4.79641	0.99929	0.423024	0.417636
GOTERM_MF_DIRECT	GO:0000981~DNA-binding transcription factor activity, RNA polymerase II-specific	48	4.20315	0.0155465	LOC105423711, LOC105425119, LOC105425751, LOC105429978, LOC105422263, LOC105428148, LOC105422441, LOC105428147, LOC105429533, LOC105426965, LOC105425898, LOC105424488, LOC105423795, LOC105427678, LOC105427273, LOC105434237, LOC105430550, LOC105423273, LOC105431526, LOC105430712, LOC105434318, LOC105430214, LOC105431744, LOC105421985, LOC105422979, LOC105426499, LOC105424298, LOC105425124, LOC1054…	739	363	7798	1.39532	0.999376	0.423024	0.417636
GOTERM_BP_DIRECT	GO:0098609~cell-cell adhesion	9	0.788091	0.015766	LOC105432155, LOC105433342, LOC105428036, LOC105433949, LOC105425075, LOC105430846, LOC105422384, LOC105427456, LOC105422242	609	40	7288	2.69261	0.999591	0.235339	0.227174
KEGG_PATHWAY	pbar00010:Glycolysis / Gluconeogenesis	9	0.788091	0.016994	LOC105428890, LOC105422259, LOC105426283, LOC105434157, LOC105428442, LOC105428232, LOC105422271, LOC105426301, LOC105429368	248	42	3061	2.64487	0.853347	0.240041	0.231544
GOTERM_BP_DIRECT	GO:0007218~neuropeptide signaling pathway	6	0.525394	0.0172576	LOC105432487, LOC105429695, LOC105434244, LOC105425137, LOC105433810, LOC105428437	609	19	7288	3.7791	0.999806	0.235339	0.227174
GOTERM_MF_DIRECT	GO:0005319~lipid transporter activity	6	0.525394	0.0176681	LOC105423327, LOC105423329, LOC105423328, LOC105423409, LOC105423330, LOC105423332	739	17	7798	3.72427	0.999774	0.423024	0.417636
GOTERM_BP_DIRECT	GO:0009952~anterior/posterior pattern specification	5	0.437828	0.0186441	LOC105434237, LOC105423273, LOC105434242, LOC105434241, LOC105424238	609	13	7288	4.60275	0.999903	0.235339	0.227174
KEGG_PATHWAY	pbar00620:Pyruvate metabolism	8	0.700525	0.0193869	LOC105422259, LOC105426283, LOC105434157, LOC105428442, LOC105428232, LOC105422271, LOC105426301, LOC105422246	248	35	3061	2.8212	0.888381	0.243414	0.234797
GOTERM_BP_DIRECT	GO:0070365~hepatocyte differentiation	3	0.262697	0.0196916	LOC105434157, LOC105426301, LOC105434273	609	3	7288	11.9672	0.999943	0.235339	0.227174
GOTERM_BP_DIRECT	GO:0019543~propionate catabolic process	3	0.262697	0.0196916	LOC105434157, LOC105426301, LOC105434273	609	3	7288	11.9672	0.999943	0.235339	0.227174
GOTERM_BP_DIRECT	GO:0046327~glycerol biosynthetic process from pyruvate	3	0.262697	0.0196916	LOC105434157, LOC105426301, LOC105434273	609	3	7288	11.9672	0.999943	0.235339	0.227174
GOTERM_BP_DIRECT	GO:0071333~cellular response to glucose stimulus	3	0.262697	0.0196916	LOC105434157, LOC105426301, LOC105434273	609	3	7288	11.9672	0.999943	0.235339	0.227174
GOTERM_BP_DIRECT	GO:0033993~response to lipid	3	0.262697	0.0196916	LOC105434157, LOC105426301, LOC105434273	609	3	7288	11.9672	0.999943	0.235339	0.227174
GOTERM_BP_DIRECT	GO:0097638~L-arginine import across plasma membrane	3	0.262697	0.0196916	LOC105424661, LOC105434061, LOC105424676	609	3	7288	11.9672	0.999943	0.235339	0.227174
GOTERM_BP_DIRECT	GO:0007214~gamma-aminobutyric acid signaling pathway	3	0.262697	0.0196916	LOC105427462, LOC105430872, LOC105425512	609	3	7288	11.9672	0.999943	0.235339	0.227174
GOTERM_BP_DIRECT	GO:0006570~tyrosine metabolic process	3	0.262697	0.0196916	LOC105429559, LOC105425166, LOC105426762	609	3	7288	11.9672	0.999943	0.235339	0.227174
GOTERM_BP_DIRECT	GO:0071549~cellular response to dexamethasone stimulus	3	0.262697	0.0196916	LOC105434157, LOC105426301, LOC105434273	609	3	7288	11.9672	0.999943	0.235339	0.227174
GOTERM_BP_DIRECT	GO:0043266~regulation of potassium ion transport	3	0.262697	0.0196916	LOC105421984, LOC105423680, LOC105432726	609	3	7288	11.9672	0.999943	0.235339	0.227174
GOTERM_CC_DIRECT	GO:0000221~vacuolar proton-transporting V-type ATPase, V1 domain	3	0.262697	0.0212814	LOC105431359, LOC105426996, LOC105423247	727	3	8362	11.5021	0.971256	0.250817	0.240176
GOTERM_CC_DIRECT	GO:0033017~sarcoplasmic reticulum membrane	3	0.262697	0.0212814	LOC105422969, LOC105423295, LOC105431823	727	3	8362	11.5021	0.971256	0.250817	0.240176
GOTERM_CC_DIRECT	GO:0038039~G protein-coupled receptor heterodimeric complex	3	0.262697	0.0212814	LOC105427462, LOC105430872, LOC105425512	727	3	8362	11.5021	0.971256	0.250817	0.240176
GOTERM_MF_DIRECT	GO:0050839~cell adhesion molecule binding	6	0.525394	0.022605	LOC105432155, LOC105427084, LOC105433949, LOC105425075, LOC105430846, LOC105422242	739	18	7798	3.51737	0.999979	0.423024	0.417636
GOTERM_MF_DIRECT	GO:0004312~fatty acid synthase activity	6	0.525394	0.022605	LOC105425801, LOC105429340, LOC105423682, LOC105422792, LOC105422552, LOC105423443	739	18	7798	3.51737	0.999979	0.423024	0.417636
GOTERM_MF_DIRECT	GO:0005509~calcium ion binding	25	2.18914	0.0230698	LOC105429339, LOC105422383, LOC105421991, LOC105432012, LOC105429697, LOC105428386, LOC105432690, LOC105430159, LOC105431567, LOC105433806, LOC105434284, LOC105424694, LOC105423285, LOC105424476, LOC105426134, LOC105428616, LOC105427901, LOC105426955, LOC105422610, LOC105424699, LOC105431671, LOC105426892, LOC105429061, LOC105433812, LOC105433315	739	166	7798	1.58917	0.999983	0.423024	0.417636
GOTERM_BP_DIRECT	GO:0045337~farnesyl diphosphate biosynthetic process	4	0.350263	0.0235356	LOC105431276, LOC105431195, LOC105430933, LOC105430934	609	8	7288	5.98358	0.999992	0.26588	0.256656
KEGG_PATHWAY	pbar04142:Lysosome	15	1.31349	0.0237711	LOC105426637, LOC105426307, LOC105429729, LOC105424837, LOC105423729, LOC105430092, LOC105429758, LOC105428626, LOC105426996, LOC105426743, LOC105430221, LOC105434003, LOC105431142, LOC105432612, LOC105430950	248	98	3061	1.8892	0.932425	0.268613	0.259105
GOTERM_CC_DIRECT	GO:0005789~endoplasmic reticulum membrane	36	3.15236	0.0240382	LOC105424965, LOC105427419, LOC105430828, LOC105430209, LOC105425674, LOC105425279, LOC105427511, LOC105425277, LOC105424962, LOC105422883, LOC105424963, LOC105429210, LOC105429277, LOC105430032, LOC105432253, LOC105428222, LOC105430810, LOC105430811, LOC105433109, LOC105430378, LOC105431148, LOC105426511, LOC105434283, LOC112552780, LOC105427620, LOC105427009, LOC105429689, LOC105425401, LOC1054…	727	287	8362	1.44277	0.981953	0.26442	0.253202
GOTERM_BP_DIRECT	GO:0034626~fatty acid elongation, polyunsaturated fatty acid	5	0.437828	0.0244176	LOC105431156, LOC105431151, LOC105425279, LOC105425277, LOC105431148	609	14	7288	4.27399	0.999995	0.26588	0.256656
GOTERM_BP_DIRECT	GO:0019367~fatty acid elongation, saturated fatty acid	5	0.437828	0.0244176	LOC105431156, LOC105431151, LOC105425279, LOC105425277, LOC105431148	609	14	7288	4.27399	0.999995	0.26588	0.256656
GOTERM_BP_DIRECT	GO:0034625~fatty acid elongation, monounsaturated fatty acid	5	0.437828	0.0244176	LOC105431156, LOC105431151, LOC105425279, LOC105425277, LOC105431148	609	14	7288	4.27399	0.999995	0.26588	0.256656
GOTERM_MF_DIRECT	GO:0046983~protein dimerization activity	13	1.13835	0.0244376	LOC105429978, LOC105429725, LOC105428148, LOC105425898, LOC105424238, LOC105427678, LOC105434237, LOC105423273, LOC105434242, LOC105434241, LOC105426175, LOC105431526, LOC105434318	739	68	7798	2.01731	0.999991	0.423024	0.417636
GOTERM_MF_DIRECT	GO:0004556~alpha-amylase activity	3	0.262697	0.0251479	LOC105428643, LOC105428642, LOC112552182	739	3	7798	10.5521	0.999994	0.423024	0.417636
GOTERM_MF_DIRECT	GO:0015189~L-lysine transmembrane transporter activity	3	0.262697	0.0251479	LOC105424661, LOC105434061, LOC105424676	739	3	7798	10.5521	0.999994	0.423024	0.417636
GOTERM_MF_DIRECT	GO:0004613~phosphoenolpyruvate carboxykinase (GTP) activity	3	0.262697	0.0251479	LOC105434157, LOC105426301, LOC105434273	739	3	7798	10.5521	0.999994	0.423024	0.417636
GOTERM_MF_DIRECT	GO:0004965~G protein-coupled GABA receptor activity	3	0.262697	0.0251479	LOC105427462, LOC105430872, LOC105425512	739	3	7798	10.5521	0.999994	0.423024	0.417636
GOTERM_MF_DIRECT	GO:0015252~proton channel activity	3	0.262697	0.0251479	LOC112552188, LOC105428314, LOC105428313	739	3	7798	10.5521	0.999994	0.423024	0.417636
GOTERM_MF_DIRECT	GO:0045735~nutrient reservoir activity	3	0.262697	0.0251479	LOC105430540, LOC105430341, LOC105424140	739	3	7798	10.5521	0.999994	0.423024	0.417636
GOTERM_MF_DIRECT	GO:0061459~L-arginine transmembrane transporter activity	3	0.262697	0.0251479	LOC105424661, LOC105434061, LOC105424676	739	3	7798	10.5521	0.999994	0.423024	0.417636
GOTERM_CC_DIRECT	GO:0031012~extracellular matrix	14	1.22592	0.0258656	LOC105423306, LOC105423814, LOC105424551, LOC105428027, LOC105429005, LOC105425755, LOC105422179, LOC105427239, LOC105428327, LOC105429503, LOC105432356, LOC105430381, LOC105424383, LOC105429092	727	83	8362	1.94011	0.986753	0.266739	0.255423
GOTERM_MF_DIRECT	GO:0005254~chloride channel activity	6	0.525394	0.0283544	LOC105428153, LOC105423658, LOC105422261, LOC105424198, LOC105433768, LOC105433259	739	19	7798	3.33224	0.999999	0.460514	0.454648
GOTERM_BP_DIRECT	GO:0009653~anatomical structure morphogenesis	13	1.13835	0.0324055	LOC105422932, LOC105427902, LOC105433949, LOC105429801, LOC105427456, LOC105422384, LOC105423285, LOC105422242, LOC105424304, LOC105428438, LOC105428036, LOC105433342, LOC105432690	609	80	7288	1.94466	1	0.345189	0.333213
GOTERM_MF_DIRECT	GO:0004337~(2E,6E)-farnesyl diphosphate synthase activity	4	0.350263	0.0329014	LOC105431276, LOC105431195, LOC105430933, LOC105430934	739	8	7798	5.27605	1	0.499889	0.493521
GOTERM_MF_DIRECT	GO:0004161~dimethylallyltranstransferase activity	4	0.350263	0.0329014	LOC105431276, LOC105431195, LOC105430933, LOC105430934	739	8	7798	5.27605	1	0.499889	0.493521
GOTERM_BP_DIRECT	GO:0006633~fatty acid biosynthetic process	7	0.61296	0.0347195	LOC105425801, LOC105429340, LOC105423682, LOC105422792, LOC105425277, LOC105422552, LOC105423443	609	30	7288	2.79234	1	0.36197	0.349412
GOTERM_MF_DIRECT	GO:0009922~fatty acid elongase activity	5	0.437828	0.0368837	LOC105431156, LOC105431151, LOC105425279, LOC105425277, LOC105431148	739	14	7798	3.76861	1	0.526432	0.519725
GOTERM_MF_DIRECT	GO:0102965~alcohol-forming long-chain fatty acyl-CoA reductase activity	5	0.437828	0.0368837	LOC105425825, LOC105427816, LOC105434203, LOC105425816, LOC105425809	739	14	7798	3.76861	1	0.526432	0.519725
GOTERM_BP_DIRECT	GO:0048167~regulation of synaptic plasticity	3	0.262697	0.0372153	LOC105429835, LOC112552802, LOC105433558	609	4	7288	8.97537	1	0.372153	0.359242
GOTERM_BP_DIRECT	GO:0006937~regulation of muscle contraction	3	0.262697	0.0372153	LOC105421984, LOC105423680, LOC105432726	609	4	7288	8.97537	1	0.372153	0.359242
GOTERM_BP_DIRECT	GO:0006874~intracellular calcium ion homeostasis	5	0.437828	0.0388783	LOC105431233, LOC105430057, LOC105423295, LOC105431823, LOC105431103	609	16	7288	3.73974	1	0.381007	0.367788
GOTERM_CC_DIRECT	GO:0055120~striated muscle dense body	3	0.262697	0.0401241	LOC105421984, LOC105423680, LOC105432726	727	4	8362	8.62655	0.998837	0.348446	0.333663
GOTERM_CC_DIRECT	GO:0048788~cytoskeleton of presynaptic active zone	3	0.262697	0.0401241	LOC105429835, LOC112552802, LOC105433558	727	4	8362	8.62655	0.998837	0.348446	0.333663
GOTERM_CC_DIRECT	GO:0033179~proton-transporting V-type ATPase, V0 domain	3	0.262697	0.0401241	LOC105426637, LOC105429758, LOC105428957	727	4	8362	8.62655	0.998837	0.348446	0.333663
GOTERM_MF_DIRECT	GO:0016298~lipase activity	6	0.525394	0.042419	LOC105433840, LOC105432393, LOC105433450, LOC105431749, LOC105433837, LOC105431049	739	21	7798	3.01488	1	0.555269	0.548196
GOTERM_MF_DIRECT	GO:0008970~phospholipase A1 activity	6	0.525394	0.042419	LOC105432135, LOC105433840, LOC105433450, LOC105431749, LOC105433837, LOC105431049	739	21	7798	3.01488	1	0.555269	0.548196
GOTERM_BP_DIRECT	GO:0015718~monocarboxylic acid transport	4	0.350263	0.0444914	LOC105424823, LOC105433256, LOC105434125, LOC105433255	609	10	7288	4.78686	1	0.427466	0.412636
GOTERM_MF_DIRECT	GO:0099095~ligand-gated monoatomic anion channel activity	4	0.350263	0.0459517	LOC105428153, LOC105423658, LOC105433768, LOC105433259	739	9	7798	4.68982	1	0.555269	0.548196
GOTERM_MF_DIRECT	GO:0000977~RNA polymerase II transcription regulatory region sequence-specific DNA binding	15	1.31349	0.0460553	LOC105422979, LOC105425124, LOC105428216, LOC105429978, LOC105428148, LOC105422441, LOC105428147, LOC105429533, LOC105425744, LOC105427678, LOC105429124, LOC105434279, LOC105428990, LOC105431526, LOC105430862	739	91	7798	1.73936	1	0.555269	0.548196
GOTERM_MF_DIRECT	GO:0000064~L-ornithine transmembrane transporter activity	3	0.262697	0.0471566	LOC105424661, LOC105434061, LOC105424676	739	4	7798	7.91407	1	0.555269	0.548196
GOTERM_MF_DIRECT	GO:0005251~delayed rectifier potassium channel activity	3	0.262697	0.0471566	LOC105422766, LOC105433652, LOC105433677	739	4	7798	7.91407	1	0.555269	0.548196
GOTERM_MF_DIRECT	GO:0015459~potassium channel regulator activity	3	0.262697	0.0471566	LOC105421984, LOC105423680, LOC105432726	739	4	7798	7.91407	1	0.555269	0.548196
GOTERM_BP_DIRECT	GO:0030148~sphingolipid biosynthetic process	5	0.437828	0.0475938	LOC105431156, LOC105431151, LOC105425279, LOC105425277, LOC105431148	609	17	7288	3.51975	1	0.440018	0.424753
GOTERM_BP_DIRECT	GO:0042761~very long-chain fatty acid biosynthetic process	5	0.437828	0.0475938	LOC105431156, LOC105431151, LOC105425279, LOC105425277, LOC105431148	609	17	7288	3.51975	1	0.440018	0.424753
KEGG_PATHWAY	pbar04820:Cytoskeleton in muscle cells	11	0.963222	0.0476786	LOC105431552, LOC105432243, LOC105432220, LOC105428683, LOC105429339, LOC105423285, LOC105426247, LOC105430106, LOC105424302, LOC105424304, LOC105424303	248	69	3061	1.96768	0.995795	0.458733	0.442495
KEGG_PATHWAY	pbar00053:Ascorbate and aldarate metabolism	5	0.437828	0.0514249	LOC105427350, LOC105428020, LOC105428442, LOC105428232, LOC105422146	248	18	3061	3.42854	0.997296	0.458733	0.442495
KEGG_PATHWAY	pbar01240:Biosynthesis of cofactors	16	1.40105	0.0527746	LOC105421986, LOC105430918, LOC105431937, LOC105429924, LOC105428015, LOC105422299, LOC105423477, LOC105422146, LOC105428020, LOC105433322, LOC105428442, LOC105434001, LOC105428232, LOC105431294, LOC105433899, LOC105434315	248	119	3061	1.65953	0.997694	0.458733	0.442495
GOTERM_CC_DIRECT	GO:0005774~vacuolar membrane	5	0.437828	0.0538869	LOC105425308, LOC105425307, LOC105432738, LOC105429758, LOC105434070	727	17	8362	3.38296	0.999893	0.444567	0.425706
GOTERM_BP_DIRECT	GO:0042811~pheromone biosynthetic process	4	0.350263	0.0574857	LOC105431276, LOC105431195, LOC105430933, LOC105430934	609	11	7288	4.35169	1	0.504067	0.486579
GOTERM_BP_DIRECT	GO:0051260~protein homooligomerization	4	0.350263	0.0574857	LOC105422766, LOC105426956, LOC105430272, LOC105433677	609	11	7288	4.35169	1	0.504067	0.486579
GOTERM_BP_DIRECT	GO:0042594~response to starvation	3	0.262697	0.0586364	LOC105434157, LOC105426301, LOC105434273	609	5	7288	7.1803	1	0.504067	0.486579
GOTERM_BP_DIRECT	GO:0001508~action potential	3	0.262697	0.0586364	LOC105422766, LOC105433652, LOC105433677	609	5	7288	7.1803	1	0.504067	0.486579
KEGG_PATHWAY	pbar01040:Biosynthesis of unsaturated fatty acids	6	0.525394	0.0611699	LOC105431156, LOC105433741, LOC105427419, LOC105431151, LOC105427511, LOC105431148	248	27	3061	2.74283	0.999149	0.493728	0.476251
GOTERM_BP_DIRECT	GO:0003333~amino acid transmembrane transport	5	0.437828	0.0679753	LOC105425308, LOC105425307, LOC105432738, LOC105422253, LOC105434070	609	19	7288	3.14925	1	0.574274	0.55435
GOTERM_MF_DIRECT	GO:0030594~neurotransmitter receptor activity	5	0.437828	0.070003	LOC105428153, LOC105423019, LOC105423658, LOC105433768, LOC105433259	739	17	7798	3.10356	1	0.768803	0.759009
GOTERM_MF_DIRECT	GO:0015179~L-amino acid transmembrane transporter activity	6	0.525394	0.0701674	LOC105425308, LOC105425307, LOC105432738, LOC105422253, LOC105434070, LOC105426369	739	24	7798	2.63802	1	0.768803	0.759009
GOTERM_BP_DIRECT	GO:0006357~regulation of transcription by RNA polymerase II	50	4.37828	0.0727708	LOC105422843, LOC105425751, LOC105428940, LOC105428148, LOC105422441, LOC105428147, LOC105429556, LOC105430111, LOC105434237, LOC105434279, LOC105430550, LOC105431526, LOC105430712, LOC105434318, LOC105422979, LOC105426499, LOC105424238, LOC105427986, LOC105429124, LOC105427782, LOC105428990, LOC105426175, LOC105430862, LOC105423711, LOC105429978, LOC105422263, LOC105425898, LOC105429533, LOC1054…	609	478	7288	1.25179	1	0.604368	0.5834
GOTERM_MF_DIRECT	GO:0004989~octopamine receptor activity	3	0.262697	0.0737305	LOC105423033, LOC105423034, LOC105432456	739	5	7798	6.33126	1	0.768803	0.759009
GOTERM_MF_DIRECT	GO:0017080~sodium channel regulator activity	3	0.262697	0.0737305	LOC105425763, LOC105425766, LOC105425764	739	5	7798	6.33126	1	0.768803	0.759009
KEGG_PATHWAY	pbar01212:Fatty acid metabolism	9	0.788091	0.0775383	LOC105424603, LOC105431156, LOC105433741, LOC105427419, LOC105423528, LOC105431151, LOC105427511, LOC105426723, LOC105431148	248	56	3061	1.98365	0.999881	0.584122	0.563445
GOTERM_MF_DIRECT	GO:0008061~chitin binding	10	0.875657	0.0783235	LOC105427817, LOC105431254, LOC105433398, LOC105433122, LOC105428982, LOC105424551, LOC105426167, LOC105428191, LOC105433402, LOC105428899	739	56	7798	1.8843	1	0.768803	0.759009
GOTERM_MF_DIRECT	GO:0004089~carbonate dehydratase activity	4	0.350263	0.0783494	LOC105429178, LOC105427150, LOC105423813, LOC105426284	739	11	7798	3.83713	1	0.768803	0.759009
GOTERM_MF_DIRECT	GO:0038062~protein tyrosine kinase collagen receptor activity	4	0.350263	0.0783494	LOC105427565, LOC105430269, LOC105430302, LOC105424018	739	11	7798	3.83713	1	0.768803	0.759009
GOTERM_MF_DIRECT	GO:0004601~peroxidase activity	4	0.350263	0.0783494	LOC105429244, LOC105433803, LOC105430734, LOC105422047	739	11	7798	3.83713	1	0.768803	0.759009
GOTERM_BP_DIRECT	GO:0007399~nervous system development	6	0.525394	0.0787889	LOC105434237, LOC105434242, LOC105434241, LOC105425784, LOC105431744, LOC105425269	609	28	7288	2.56439	1	0.625412	0.603714
GOTERM_BP_DIRECT	GO:0006811~monoatomic ion transport	6	0.525394	0.0787889	LOC105422216, LOC105434122, LOC105422151, LOC105429225, LOC105432932, LOC105428922	609	28	7288	2.56439	1	0.625412	0.603714
GOTERM_CC_DIRECT	GO:0005777~peroxisome	10	0.875657	0.0789282	LOC105425825, LOC105427816, LOC105434203, LOC105424989, LOC105425816, LOC105428522, LOC112553041, LOC105433616, LOC105425809, LOC105423973	727	61	8362	1.88558	0.999999	0.62015	0.593841
GOTERM_MF_DIRECT	GO:0004888~transmembrane signaling receptor activity	6	0.525394	0.0811903	LOC105428153, LOC105431530, LOC105423019, LOC105426901, LOC105422484, LOC105433768	739	25	7798	2.5325	1	0.780421	0.770479
GOTERM_BP_DIRECT	GO:0032869~cellular response to insulin stimulus	3	0.262697	0.0831847	LOC105434157, LOC105426301, LOC105434273	609	6	7288	5.98358	1	0.625412	0.603714
GOTERM_BP_DIRECT	GO:0006171~cAMP biosynthetic process	3	0.262697	0.0831847	LOC105425253, LOC105430765, LOC105427823	609	6	7288	5.98358	1	0.625412	0.603714
GOTERM_BP_DIRECT	GO:0002028~regulation of sodium ion transport	3	0.262697	0.0831847	LOC105425763, LOC105425766, LOC105425764	609	6	7288	5.98358	1	0.625412	0.603714
GOTERM_BP_DIRECT	GO:0007168~receptor guanylyl cyclase signaling pathway	3	0.262697	0.0831847	LOC105430561, LOC105426664, LOC105433193	609	6	7288	5.98358	1	0.625412	0.603714
GOTERM_MF_DIRECT	GO:0005230~extracellular ligand-gated monoatomic ion channel activity	5	0.437828	0.0835452	LOC105428153, LOC105423019, LOC105423658, LOC105433768, LOC105433259	739	18	7798	2.93114	1	0.786996	0.776971
GOTERM_CC_DIRECT	GO:0071944~cell periphery	7	0.61296	0.0872411	LOC105428560, LOC105432356, LOC105424935, LOC105431560, LOC105426497, LOC105422047, LOC105423313	727	36	8362	2.23651	1	0.641435	0.614222
GOTERM_BP_DIRECT	GO:0071880~adenylate cyclase-activating adrenergic receptor signaling pathway	4	0.350263	0.0880683	LOC105423033, LOC105423034, LOC105432437, LOC105432456	609	13	7288	3.6822	1	0.625412	0.603714
GOTERM_BP_DIRECT	GO:0043410~positive regulation of MAPK cascade	4	0.350263	0.0880683	LOC105423033, LOC105423034, LOC105432456, LOC105424018	609	13	7288	3.6822	1	0.625412	0.603714
GOTERM_BP_DIRECT	GO:0019752~carboxylic acid metabolic process	4	0.350263	0.0880683	LOC105422259, LOC105422271, LOC105426444, LOC105431664	609	13	7288	3.6822	1	0.625412	0.603714
GOTERM_BP_DIRECT	GO:0007189~adenylate cyclase-activating G protein-coupled receptor signaling pathway	4	0.350263	0.0880683	LOC105425253, LOC105427765, LOC105430765, LOC105427823	609	13	7288	3.6822	1	0.625412	0.603714
GOTERM_CC_DIRECT	GO:0005911~cell-cell junction	5	0.437828	0.0894121	LOC105432155, LOC105433949, LOC105425075, LOC105430846, LOC105422242	727	20	8362	2.87552	1	0.641435	0.614222
GOTERM_BP_DIRECT	GO:0001676~long-chain fatty acid metabolic process	5	0.437828	0.092142	LOC105423528, LOC105428522, LOC105433616, LOC105426723, LOC105423973	609	21	7288	2.84932	1	0.644994	0.622616
KEGG_PATHWAY	pbar00040:Pentose and glucuronate interconversions	5	0.437828	0.0956779	LOC105431443, LOC105428020, LOC105428232, LOC105422146, LOC105431786	248	22	3061	2.80517	0.999987	0.666158	0.642577
GOTERM_MF_DIRECT	GO:0004315~3-oxoacyl-[acyl-carrier-protein] synthase activity	4	0.350263	0.0973895	LOC105425801, LOC105429340, LOC105422792, LOC105422552	739	12	7798	3.51737	1	0.899421	0.887963

## Sheet: DO Functional Annotation Table
ID	Gene Name	Species	GOTERM_BP_DIRECT	GOTERM_CC_DIRECT	GOTERM_MF_DIRECT	KEGG_PATHWAY
LOC105428232	1,5-anhydro-D-fructose reductase-like(LOC105428232)	Pogonomyrmex barbatus	GO:0044281~small molecule metabolic process,	GO:0005829~cytosol,	GO:0004032~aldose reductase (NADPH) activity,GO:0004033~aldo-keto reductase (NADPH) activity,GO:0016491~oxidoreductase activity,	pbar00010:Glycolysis / Gluconeogenesis,pbar00040:Pentose and glucuronate interconversions,pbar00053:Ascorbate and aldarate metabolism,pbar00561:Glycerolipid metabolism,pbar00620:Pyruvate metabolism,pbar01100:Metabolic pathways,pbar01240:Biosynthesis of cofactors,
LOC105425147	1-phosphatidylinositol 4,5-bisphosphate phosphodiesterase epsilon-1-like(LOC105425147)	Pogonomyrmex barbatus	GO:0006629~lipid metabolic process,GO:0007186~G protein-coupled receptor signaling pathway,GO:0007265~Ras protein signal transduction,GO:0016042~lipid catabolic process,GO:0046488~phosphatidylinositol metabolic process,GO:0048015~phosphatidylinositol-mediated signaling,GO:0051209~release of sequestered calcium ion into cytosol,		GO:0004435~phosphatidylinositol phospholipase C activity,	pbar00562:Inositol phosphate metabolism,pbar01100:Metabolic pathways,pbar04070:Phosphatidylinositol signaling system,
LOC105427943	2-phosphoxylose phosphatase 1(LOC105427943)	Pogonomyrmex barbatus	GO:0006024~glycosaminoglycan biosynthetic process,GO:0016311~dephosphorylation,GO:0050650~chondroitin sulfate proteoglycan biosynthetic process,	GO:0000139~Golgi membrane,	GO:0016791~phosphatase activity,
LOC105428522	4-coumarate--CoA ligase 1-like(LOC105428522)	Pogonomyrmex barbatus	GO:0001676~long-chain fatty acid metabolic process,GO:0008218~bioluminescence,GO:0046949~fatty-acyl-CoA biosynthetic process,	GO:0005777~peroxisome,	GO:0004467~long-chain fatty acid-CoA ligase activity,GO:0004497~monooxygenase activity,GO:0016405~CoA-ligase activity,	pbar00130:Ubiquinone and other terpenoid-quinone biosynthesis,pbar01100:Metabolic pathways,
LOC105433616	4-coumarate--CoA ligase 1-like(LOC105433616)	Pogonomyrmex barbatus	GO:0001676~long-chain fatty acid metabolic process,GO:0046949~fatty-acyl-CoA biosynthetic process,	GO:0005739~mitochondrion,GO:0005777~peroxisome,	GO:0004467~long-chain fatty acid-CoA ligase activity,	pbar00130:Ubiquinone and other terpenoid-quinone biosynthesis,pbar01100:Metabolic pathways,
LOC105430085	4-hydroxybutyrate coenzyme A transferase-like(LOC105430085)	Pogonomyrmex barbatus	GO:0006083~acetate metabolic process,	GO:0005739~mitochondrion,	GO:0003986~acetyl-CoA hydrolase activity,GO:0008775~acetate CoA-transferase activity,
LOC105425929	43 kDa receptor-associated protein of the synapse homolog(LOC105425929)	Pogonomyrmex barbatus	GO:0007271~synaptic transmission, cholinergic,GO:1900075~positive regulation of neuromuscular synaptic transmission,	GO:0005737~cytoplasm,GO:0005886~plasma membrane,GO:0031594~neuromuscular junction,	GO:0005515~protein binding,GO:0033130~acetylcholine receptor binding,GO:0046872~metal ion binding,
LOC105428015	5-aminolevulinate synthase(Alas)	Pogonomyrmex barbatus	GO:0006782~protoporphyrinogen IX biosynthetic process,GO:0006783~heme biosynthetic process,GO:0042541~hemoglobin biosynthetic process,GO:0048821~erythrocyte development,	GO:0005739~mitochondrion,	GO:0003870~5-aminolevulinate synthase activity,GO:0030170~pyridoxal phosphate binding,	pbar00260:Glycine, serine and threonine metabolism,pbar00860:Porphyrin metabolism,pbar01100:Metabolic pathways,pbar01240:Biosynthesis of cofactors,
LOC105427470	ABC transporter expressed in trachea(Atet)	Pogonomyrmex barbatus		GO:0005886~plasma membrane,	GO:0005524~ATP binding,GO:0016887~ATP hydrolysis activity,GO:0140359~ABC-type transporter activity,	pbar02010:ABC transporters,
LOC105430710	ADP-ribosylation factor-like protein 16(LOC105430710)	Pogonomyrmex barbatus			GO:0003924~GTPase activity,GO:0005525~GTP binding,
LOC105423409	ATP-binding cassette sub-family A member 5-like(LOC105423409)	Pogonomyrmex barbatus	GO:0006869~lipid transport,GO:0055085~transmembrane transport,	GO:0016020~membrane,GO:0043231~intracellular membrane-bounded organelle,	GO:0005319~lipid transporter activity,GO:0005524~ATP binding,GO:0016887~ATP hydrolysis activity,GO:0140359~ABC-type transporter activity,	pbar02010:ABC transporters,
LOC105432943	ATP-binding cassette sub-family G member 1-like(LOC105432943)	Pogonomyrmex barbatus		GO:0005886~plasma membrane,	GO:0005524~ATP binding,GO:0016887~ATP hydrolysis activity,GO:0140359~ABC-type transporter activity,	pbar02010:ABC transporters,
LOC105430209	ATPase H(+)-transporting accessory protein 2(ATP6AP2)	Pogonomyrmex barbatus	GO:0030177~positive regulation of Wnt signaling pathway,	GO:0005789~endoplasmic reticulum membrane,GO:0009897~external side of plasma membrane,GO:0016020~membrane,GO:0031982~vesicle,GO:0098588~bounding membrane of organelle,	GO:0038023~signaling receptor activity,
LOC105423295	ATPase sarcoplasmic/endoplasmic reticulum Ca2+ transporting SERCA(SERCA)	Pogonomyrmex barbatus	GO:0006874~intracellular calcium ion homeostasis,GO:0070588~calcium ion transmembrane transport,	GO:0016020~membrane,GO:0033017~sarcoplasmic reticulum membrane,	GO:0005388~P-type calcium transporter activity,GO:0005524~ATP binding,GO:0016887~ATP hydrolysis activity,	pbar04148:Efferocytosis,
LOC105426723	Acyl-CoA synthetase long-chain(Acsl)	Pogonomyrmex barbatus	GO:0001676~long-chain fatty acid metabolic process,GO:0030182~neuron differentiation,GO:0035336~long-chain fatty-acyl-CoA metabolic process,	GO:0005783~endoplasmic reticulum,GO:0005811~lipid droplet,GO:0005886~plasma membrane,	GO:0090433~palmitoyl-CoA ligase activity,	pbar00061:Fatty acid biosynthesis,pbar00071:Fatty acid degradation,pbar01100:Metabolic pathways,pbar01212:Fatty acid metabolism,pbar04146:Peroxisome,
LOC105429924	Adenylate kinase 2(Ak2)	Pogonomyrmex barbatus	GO:0006139~nucleobase-containing compound metabolic process,	GO:0005737~cytoplasm,GO:0005739~mitochondrion,	GO:0004017~adenylate kinase activity,GO:0005524~ATP binding,	pbar00230:Purine metabolism,pbar00730:Thiamine metabolism,pbar01100:Metabolic pathways,pbar01232:Nucleotide metabolism,pbar01240:Biosynthesis of cofactors,
LOC105427381	Adipokinetic hormone receptor(AkhR)	Pogonomyrmex barbatus	GO:0007186~G protein-coupled receptor signaling pathway,GO:0032870~cellular response to hormone stimulus,	GO:0005886~plasma membrane,GO:0016020~membrane,	GO:0004930~G protein-coupled receptor activity,GO:0042277~peptide binding,GO:0097003~adipokinetic hormone receptor activity,	pbar04080:Neuroactive ligand-receptor interaction,pbar04081:Hormone signaling,
LOC105422090	Anaplastic lymphoma kinase(Alk)	Pogonomyrmex barbatus	GO:0006468~protein phosphorylation,GO:0007169~cell surface receptor protein tyrosine kinase signaling pathway,GO:0007275~multicellular organism development,GO:0033674~positive regulation of kinase activity,GO:0045664~regulation of neuron differentiation,	GO:0005886~plasma membrane,GO:0016020~membrane,GO:0043235~receptor complex,	GO:0004714~transmembrane receptor protein tyrosine kinase activity,GO:0005515~protein binding,GO:0005524~ATP binding,
LOC105430861	Arginine kinase 1(Argk1)	Pogonomyrmex barbatus	GO:0046314~phosphocreatine biosynthetic process,	GO:0005615~extracellular space,	GO:0004054~arginine kinase activity,GO:0004111~creatine kinase activity,GO:0005524~ATP binding,	pbar00330:Arginine and proline metabolism,
LOC105423349	Armadillo repeat-containing protein gudu(gudu)	Pogonomyrmex barbatus			GO:0005515~protein binding,
LOC105425744	Arrowhead(Awh)	Pogonomyrmex barbatus	GO:0006357~regulation of transcription by RNA polymerase II,GO:0030182~neuron differentiation,	GO:0005634~nucleus,	GO:0000977~RNA polymerase II transcription regulatory region sequence-specific DNA binding,GO:0000981~DNA-binding transcription factor activity, RNA polymerase II-specific,GO:0046872~metal ion binding,
LOC105433144	BCL2 interacting protein 3(BNIP3)	Pogonomyrmex barbatus	GO:0043065~positive regulation of apoptotic process,GO:0097345~mitochondrial outer membrane permeabilization,	GO:0005634~nucleus,GO:0005740~mitochondrial envelope,GO:0005741~mitochondrial outer membrane,	GO:0042802~identical protein binding,	pbar04068:FoxO signaling pathway,pbar04137:Mitophagy - animal,pbar04140:Autophagy - animal,
LOC105426956	BTB/POZ domain-containing protein Ktl(Ktl)	Pogonomyrmex barbatus	GO:0051260~protein homooligomerization,
LOC105430272	BTB/POZ domain-containing protein twz(twz)	Pogonomyrmex barbatus	GO:0051260~protein homooligomerization,		GO:0005515~protein binding,
LOC105431478	Brefeldin-resistant Arf-GEF family protein schizo(siz)	Pogonomyrmex barbatus	GO:0030036~actin cytoskeleton organization,GO:0032012~regulation of ARF protein signal transduction,	GO:0005737~cytoplasm,	GO:0005085~guanyl-nucleotide exchange factor activity,	pbar04144:Endocytosis,
LOC105433807	CCHamide-1(CCHa1)	Pogonomyrmex barbatus		GO:0016020~membrane,
LOC105426167	COPII coat assembly protein sec16-like(LOC105426167)	Pogonomyrmex barbatus		GO:0005576~extracellular region,	GO:0008061~chitin binding,
LOC105427526	Ca[2+]-channel protein alpha[[1]] subunit D(Ca-alpha1D)	Pogonomyrmex barbatus	GO:0098703~calcium ion import across plasma membrane,	GO:0005891~voltage-gated calcium channel complex,GO:0016020~membrane,	GO:0008331~high voltage-gated calcium channel activity,GO:0046872~metal ion binding,
LOC105426284	Carbonic anhydrase-related protein A(CARPA)	Pogonomyrmex barbatus	GO:0006730~one-carbon metabolic process,		GO:0004089~carbonate dehydratase activity,GO:0008270~zinc ion binding,
LOC105423813	Carbonic anhydrase-related protein B(CARPB)	Pogonomyrmex barbatus	GO:0006730~one-carbon metabolic process,		GO:0004089~carbonate dehydratase activity,GO:0008270~zinc ion binding,
LOC105427713	Cdk5 activator-like protein(Cdk5alpha)	Pogonomyrmex barbatus	GO:0007411~axon guidance,GO:0032147~activation of protein kinase activity,GO:0045737~positive regulation of cyclin-dependent protein serine/threonine kinase activity,	GO:0005737~cytoplasm,GO:0016533~protein kinase 5 complex,GO:0030426~growth cone,	GO:0016301~kinase activity,GO:0019901~protein kinase binding,GO:0061575~cyclin-dependent protein serine/threonine kinase activator activity,
LOC105427572	Ceramide phosphoethanolamine synthase(Cpes)	Pogonomyrmex barbatus		GO:0016020~membrane,		pbar00600:Sphingolipid metabolism,
LOC105433398	Chitin binding Peritrophin-A domain-containing protein Gasp(Gasp)	Pogonomyrmex barbatus		GO:0005576~extracellular region,	GO:0008061~chitin binding,
LOC105427135	Choline acetyltransferase(ChAT)	Pogonomyrmex barbatus	GO:0007274~neuromuscular synaptic transmission,GO:0008292~acetylcholine biosynthetic process,	GO:0005737~cytoplasm,GO:0043005~neuron projection,GO:0045202~synapse,	GO:0004102~choline O-acetyltransferase activity,	pbar00564:Glycerophospholipid metabolism,
LOC105430442	Chronophage(Cph)	Pogonomyrmex barbatus	GO:0006357~regulation of transcription by RNA polymerase II,	GO:0005634~nucleus,	GO:0000978~RNA polymerase II cis-regulatory region sequence-specific DNA binding,GO:0003700~DNA-binding transcription factor activity,GO:0046872~metal ion binding,
LOC105423260	Crustacean cardioactive peptide receptor(CCAP-R)	Pogonomyrmex barbatus	GO:0007186~G protein-coupled receptor signaling pathway,	GO:0005886~plasma membrane,GO:0016020~membrane,	GO:0004930~G protein-coupled receptor activity,GO:0008188~neuropeptide receptor activity,	pbar04080:Neuroactive ligand-receptor interaction,
LOC105430734	Curly Su(cysu)	Pogonomyrmex barbatus	GO:0006979~response to oxidative stress,		GO:0004601~peroxidase activity,GO:0020037~heme binding,GO:0046872~metal ion binding,
LOC105423704	Cytochrome P450 18a1(Cyp18a1)	Pogonomyrmex barbatus	GO:0006082~organic acid metabolic process,GO:0006805~xenobiotic metabolic process,	GO:0005737~cytoplasm,GO:0016020~membrane,GO:0043231~intracellular membrane-bounded organelle,	GO:0005506~iron ion binding,GO:0008395~steroid hydroxylase activity,GO:0016712~oxidoreductase activity, acting on paired donors, with incorporation or reduction of molecular oxygen, reduced flavin or flavoprotein as one donor, and incorporation of one atom of oxygen,GO:0020037~heme binding,	pbar00981:Insect hormone biosynthesis,
LOC105433999	Cytochrome P450 4g15(Cyp4g15)	Pogonomyrmex barbatus		GO:0016020~membrane,	GO:0004497~monooxygenase activity,GO:0005506~iron ion binding,GO:0016705~oxidoreductase activity, acting on paired donors, with incorporation or reduction of molecular oxygen,GO:0020037~heme binding,
LOC105433416	Cytochrome b5-related(Cyt-b5-r)	Pogonomyrmex barbatus	GO:0006629~lipid metabolic process,	GO:0005739~mitochondrion,GO:0016020~membrane,
LOC105423584	D-amino acid oxidase 2(Daao2)	Pogonomyrmex barbatus	GO:0019478~D-amino acid catabolic process,GO:0046416~D-amino acid metabolic process,	GO:0005782~peroxisomal matrix,	GO:0003884~D-amino-acid oxidase activity,GO:0071949~FAD binding,	pbar00260:Glycine, serine and threonine metabolism,pbar00330:Arginine and proline metabolism,pbar00470:D-Amino acid metabolism,pbar01100:Metabolic pathways,pbar04146:Peroxisome,
LOC105423643	D-arabinitol dehydrogenase 1-like(LOC105423643)	Pogonomyrmex barbatus			GO:0016491~oxidoreductase activity,
LOC105428533	D-beta-hydroxybutyrate dehydrogenase, mitochondrial(LOC105428533)	Pogonomyrmex barbatus	GO:0008202~steroid metabolic process,	GO:0016020~membrane,GO:0043231~intracellular membrane-bounded organelle,	GO:0016491~oxidoreductase activity,
LOC105426210	DAB adaptor protein(Dab)	Pogonomyrmex barbatus	GO:0030154~cell differentiation,	GO:0005737~cytoplasm,		pbar04144:Endocytosis,
LOC105425751	DNA-binding protein Ets98B(Ets98B)	Pogonomyrmex barbatus	GO:0006357~regulation of transcription by RNA polymerase II,GO:0030154~cell differentiation,	GO:0005634~nucleus,	GO:0000981~DNA-binding transcription factor activity, RNA polymerase II-specific,GO:0043565~sequence-specific DNA binding,
LOC105432814	DUF1676 domain-containing protein Osi20(Osi20)	Pogonomyrmex barbatus		GO:0016020~membrane,
LOC105430975	Dicarboxylate carrier 1(Dic1)	Pogonomyrmex barbatus	GO:0015709~thiosulfate transport,GO:0015729~oxaloacetate transport,GO:0035435~phosphate ion transmembrane transport,GO:0071422~succinate transmembrane transport,GO:0071423~malate transmembrane transport,	GO:0016020~membrane,	GO:0005310~dicarboxylic acid transmembrane transporter activity,GO:0015116~sulfate transmembrane transporter activity,GO:0015117~thiosulfate transmembrane transporter activity,GO:0015131~oxaloacetate transmembrane transporter activity,GO:0015140~malate transmembrane transporter activity,GO:0015141~succinate transmembrane transporter activity,GO:0015297~antiporter activity,
LOC105428216	Dorsal root ganglia homeobox(Drgx)	Pogonomyrmex barbatus	GO:0006357~regulation of transcription by RNA polymerase II,	GO:0005634~nucleus,	GO:0000977~RNA polymerase II transcription regulatory region sequence-specific DNA binding,GO:0000981~DNA-binding transcription factor activity, RNA polymerase II-specific,
LOC105428036	Down syndrome cell adhesion molecule 2(Dscam2)	Pogonomyrmex barbatus	GO:0007156~homophilic cell adhesion via plasma membrane adhesion molecules,GO:0007411~axon guidance,GO:0009653~anatomical structure morphogenesis,GO:0030154~cell differentiation,GO:0048731~system development,GO:0070593~dendrite self-avoidance,GO:0098609~cell-cell adhesion,	GO:0005886~plasma membrane,GO:0016020~membrane,GO:0030424~axon,	GO:0098632~cell-cell adhesion mediator activity,
LOC105422384	Down syndrome cell adhesion molecule 3(Dscam3)	Pogonomyrmex barbatus	GO:0007411~axon guidance,GO:0009653~anatomical structure morphogenesis,GO:0030154~cell differentiation,GO:0048731~system development,GO:0098609~cell-cell adhesion,	GO:0005886~plasma membrane,GO:0016020~membrane,GO:0030424~axon,	GO:0005515~protein binding,
LOC105433342	Down syndrome cell adhesion molecule-like protein Dscam2(LOC105433342)	Pogonomyrmex barbatus	GO:0007411~axon guidance,GO:0009653~anatomical structure morphogenesis,GO:0030154~cell differentiation,GO:0048731~system development,GO:0098609~cell-cell adhesion,	GO:0005886~plasma membrane,GO:0016020~membrane,GO:0030424~axon,	GO:0005515~protein binding,
LOC105422932	Down syndrome cell adhesion molecule-like(LOC105422932)	Pogonomyrmex barbatus	GO:0007156~homophilic cell adhesion via plasma membrane adhesion molecules,GO:0007411~axon guidance,GO:0007416~synapse assembly,GO:0009653~anatomical structure morphogenesis,GO:0030154~cell differentiation,GO:0070593~dendrite self-avoidance,	GO:0005886~plasma membrane,GO:0016020~membrane,GO:0030424~axon,GO:0045202~synapse,	GO:0098632~cell-cell adhesion mediator activity,
LOC105427052	Dynein heavy chain 1(Dhc1)	Pogonomyrmex barbatus	GO:0007018~microtubule-based movement,	GO:0005858~axonemal dynein complex,GO:0005874~microtubule,GO:0030286~dynein complex,GO:0031514~motile cilium,	GO:0005524~ATP binding,GO:0008569~minus-end-directed microtubule motor activity,GO:0016887~ATP hydrolysis activity,GO:0045505~dynein intermediate chain binding,GO:0051959~dynein light intermediate chain binding,	pbar04814:Motor proteins,
LOC105428616	EF-hand domain-containing protein D2 homolog Swip-1(Swip-1)	Pogonomyrmex barbatus			GO:0005509~calcium ion binding,
LOC112552802	ELKS/Rab6-interacting/CAST family member 1-like(LOC112552802)	Pogonomyrmex barbatus	GO:0007274~neuromuscular synaptic transmission,GO:0048167~regulation of synaptic plasticity,GO:0048790~maintenance of presynaptic active zone structure,	GO:0042995~cell projection,GO:0048788~cytoskeleton of presynaptic active zone,	GO:0098882~structural constituent of presynaptic active zone,
LOC105427620	ERAD-associated E3 ubiquitin-protein ligase HRD1B-like(LOC105427620)	Pogonomyrmex barbatus	GO:0043161~proteasome-mediated ubiquitin-dependent protein catabolic process,	GO:0005789~endoplasmic reticulum membrane,GO:0012505~endomembrane system,	GO:0061630~ubiquitin protein ligase activity,
LOC105432470	Ecdysone-induced protein 93F(Eip93F)	Pogonomyrmex barbatus	GO:0006357~regulation of transcription by RNA polymerase II,	GO:0005634~nucleus,	GO:0003677~DNA binding,	pbar04214:Apoptosis - fly,
LOC105427463	Excitatory amino acid transporter 2(Eaat2)	Pogonomyrmex barbatus	GO:0015813~L-glutamate transmembrane transport,	GO:0005886~plasma membrane,	GO:0005313~L-glutamate transmembrane transporter activity,GO:0015175~neutral L-amino acid transmembrane transporter activity,GO:0015501~glutamate:sodium symporter activity,
LOC105427928	FMRFamide receptor-like(LOC105427928)	Pogonomyrmex barbatus	GO:0007186~G protein-coupled receptor signaling pathway,	GO:0005886~plasma membrane,	GO:0004930~G protein-coupled receptor activity,	pbar04080:Neuroactive ligand-receptor interaction,pbar04081:Hormone signaling,
LOC105431709	G protein alpha o subunit(Galphao)	Pogonomyrmex barbatus	GO:0007188~adenylate cyclase-modulating G protein-coupled receptor signaling pathway,	GO:0005737~cytoplasm,GO:0005834~heterotrimeric G-protein complex,	GO:0001664~G protein-coupled receptor binding,GO:0003924~GTPase activity,GO:0005525~GTP binding,GO:0031683~G-protein beta/gamma-subunit complex binding,GO:0046872~metal ion binding,	pbar04081:Hormone signaling,
LOC105433223	G-protein coupled receptor Mth2-like(LOC105433223)	Pogonomyrmex barbatus	GO:0007186~G protein-coupled receptor signaling pathway,	GO:0005886~plasma membrane,GO:0016020~membrane,	GO:0004930~G protein-coupled receptor activity,GO:0008528~G protein-coupled peptide receptor activity,
LOC105423180	GABA neurotransmitter transporter-1A(Gat-a)	Pogonomyrmex barbatus	GO:0035725~sodium ion transmembrane transport,	GO:0005886~plasma membrane,GO:0016020~membrane,GO:0043005~neuron projection,	GO:0005332~gamma-aminobutyric acid:sodium:chloride symporter activity,GO:0046872~metal ion binding,
LOC105433376	GABA neurotransmitter transporter-1B(Gat-1B)	Pogonomyrmex barbatus	GO:0035725~sodium ion transmembrane transport,	GO:0005886~plasma membrane,GO:0016020~membrane,GO:0043005~neuron projection,	GO:0005332~gamma-aminobutyric acid:sodium:chloride symporter activity,GO:0046872~metal ion binding,
LOC105424298	GATA-binding factor A-like(LOC105424298)	Pogonomyrmex barbatus	GO:0000122~negative regulation of transcription by RNA polymerase II,GO:0045165~cell fate commitment,GO:0045944~positive regulation of transcription by RNA polymerase II,	GO:0005634~nucleus,	GO:0000978~RNA polymerase II cis-regulatory region sequence-specific DNA binding,GO:0000981~DNA-binding transcription factor activity, RNA polymerase II-specific,GO:0008270~zinc ion binding,
LOC105428393	GATA-binding factor C-like(LOC105428393)	Pogonomyrmex barbatus	GO:0000122~negative regulation of transcription by RNA polymerase II,GO:0045165~cell fate commitment,GO:0045944~positive regulation of transcription by RNA polymerase II,	GO:0005634~nucleus,	GO:0000978~RNA polymerase II cis-regulatory region sequence-specific DNA binding,GO:0000981~DNA-binding transcription factor activity, RNA polymerase II-specific,GO:0008270~zinc ion binding,
LOC105429131	GTPase-activating Rap/Ran-GAP domain-like protein 3(LOC105429131)	Pogonomyrmex barbatus	GO:0051056~regulation of small GTPase mediated signal transduction,GO:0090630~activation of GTPase activity,	GO:0005737~cytoplasm,	GO:0005096~GTPase activator activity,
LOC105425784	Glial cell line-derived neurotrophic family receptor-like(Gfrl)	Pogonomyrmex barbatus	GO:0007169~cell surface receptor protein tyrosine kinase signaling pathway,GO:0007399~nervous system development,	GO:0009897~external side of plasma membrane,GO:0043235~receptor complex,	GO:0038023~signaling receptor activity,
LOC105428179	Glucuronyltransferase P(GlcAT-P)	Pogonomyrmex barbatus	GO:0005975~carbohydrate metabolic process,GO:0006486~protein glycosylation,GO:0050650~chondroitin sulfate proteoglycan biosynthetic process,	GO:0000139~Golgi membrane,	GO:0015018~galactosylgalactosylxylosylprotein 3-beta-glucuronosyltransferase activity,GO:0046872~metal ion binding,	pbar00514:Other types of O-glycan biosynthesis,
LOC105430109	Glycogen binding subunit 70E(Gbs-70E)	Pogonomyrmex barbatus	GO:0005979~regulation of glycogen biosynthetic process,	GO:0000164~protein phosphatase type 1 complex,	GO:0008157~protein phosphatase 1 binding,GO:2001069~glycogen binding,
LOC105429879	Glycogenin(Gyg)	Pogonomyrmex barbatus	GO:0005978~glycogen biosynthetic process,	GO:0005737~cytoplasm,	GO:0016757~glycosyltransferase activity,	pbar00500:Starch and sucrose metabolism,pbar01100:Metabolic pathways,
LOC105431935	Growth arrest specific protein 8(Gas8)	Pogonomyrmex barbatus	GO:0048870~cell motility,	GO:0005794~Golgi apparatus,GO:0005874~microtubule,GO:0031514~motile cilium,	GO:0008017~microtubule binding,GO:0031267~small GTPase binding,
LOC105424551	Hemolectin(Hml)	Pogonomyrmex barbatus		GO:0005576~extracellular region,GO:0005615~extracellular space,GO:0031012~extracellular matrix,	GO:0005515~protein binding,GO:0008061~chitin binding,
LOC105424235	Hig-anchoring scaffold protein(Hasp)	Pogonomyrmex barbatus		GO:0005576~extracellular region,	GO:0030414~peptidase inhibitor activity,
LOC105429580	IDLSRF-like peptide(LOC105429580)	Pogonomyrmex barbatus			GO:0005515~protein binding,
LOC105433722	INSC spindle orientation adaptor protein(insc)	Pogonomyrmex barbatus	GO:0000132~establishment of mitotic spindle orientation,GO:0008356~asymmetric cell division,GO:0009786~regulation of asymmetric cell division,GO:0045176~apical protein localization,	GO:0045179~apical cortex,	GO:0008093~cytoskeletal anchor activity,
LOC105429559	Iodotyrosine deiodinase(Iyd)	Pogonomyrmex barbatus	GO:0006570~tyrosine metabolic process,	GO:0005886~plasma membrane,	GO:0016491~oxidoreductase activity,GO:0140616~iodotyrosine deiodinase activity,
LOC105432932	Ionotropic receptor 93a(Ir93a)	Pogonomyrmex barbatus	GO:0006811~monoatomic ion transport,GO:0050906~detection of stimulus involved in sensory perception,	GO:0005886~plasma membrane,GO:0016020~membrane,	GO:0015276~ligand-gated monoatomic ion channel activity,GO:0038023~signaling receptor activity,
LOC105430283	JNK-interacting protein Aplip1(Aplip1)	Pogonomyrmex barbatus	GO:0007254~JNK cascade,GO:0046328~regulation of JNK cascade,	GO:0005737~cytoplasm,	GO:0005078~MAP-kinase scaffold activity,GO:0005515~protein binding,GO:0008432~JUN kinase binding,
LOC105432271	Kainate-type ionotropic glutamate receptor subunit 1D(KaiR1D)	Pogonomyrmex barbatus	GO:0035249~synaptic transmission, glutamatergic,GO:0050804~modulation of chemical synaptic transmission,	GO:0005886~plasma membrane,GO:0045211~postsynaptic membrane,	GO:0004970~glutamate-gated receptor activity,GO:0015276~ligand-gated monoatomic ion channel activity,GO:1904315~transmitter-gated monoatomic ion channel activity involved in regulation of postsynaptic membrane potential,
LOC105422263	Krueppel-like factor 6(LOC105422263)	Pogonomyrmex barbatus	GO:0006357~regulation of transcription by RNA polymerase II,		GO:0000978~RNA polymerase II cis-regulatory region sequence-specific DNA binding,GO:0000981~DNA-binding transcription factor activity, RNA polymerase II-specific,
LOC105424130	Kruppel homolog 1(Kr-h1)	Pogonomyrmex barbatus	GO:0006357~regulation of transcription by RNA polymerase II,GO:0010468~regulation of gene expression,	GO:0005634~nucleus,	GO:0000978~RNA polymerase II cis-regulatory region sequence-specific DNA binding,GO:0003700~DNA-binding transcription factor activity,GO:0046872~metal ion binding,
LOC105424699	Kv channel-interacting protein 2-like(LOC105424699)	Pogonomyrmex barbatus			GO:0005509~calcium ion binding,
LOC105426655	L-asparaginase(LOC105426655)	Pogonomyrmex barbatus	GO:0006520~amino acid metabolic process,GO:0009066~aspartate family amino acid metabolic process,		GO:0004067~asparaginase activity,GO:0005515~protein binding,
LOC105422271	L-lactate dehydrogenase A chain-like(LOC105422271)	Pogonomyrmex barbatus	GO:0006089~lactate metabolic process,GO:0006090~pyruvate metabolic process,GO:0019752~carboxylic acid metabolic process,		GO:0004459~L-lactate dehydrogenase activity,GO:0016616~oxidoreductase activity, acting on the CH-OH group of donors, NAD or NADP as acceptor,	pbar00010:Glycolysis / Gluconeogenesis,pbar00270:Cysteine and methionine metabolism,pbar00620:Pyruvate metabolism,pbar00640:Propanoate metabolism,pbar01100:Metabolic pathways,
LOC105422259	L-lactate dehydrogenase-like(LOC105422259)	Pogonomyrmex barbatus	GO:0006089~lactate metabolic process,GO:0006090~pyruvate metabolic process,GO:0019752~carboxylic acid metabolic process,	GO:0005737~cytoplasm,	GO:0004459~L-lactate dehydrogenase activity,	pbar00010:Glycolysis / Gluconeogenesis,pbar00270:Cysteine and methionine metabolism,pbar00620:Pyruvate metabolism,pbar00640:Propanoate metabolism,pbar01100:Metabolic pathways,
LOC105427817	LDLa and CE4_CDA_like_1 domain-containing protein vermiform(verm)	Pogonomyrmex barbatus	GO:0005975~carbohydrate metabolic process,	GO:0005576~extracellular region,	GO:0005515~protein binding,GO:0008061~chitin binding,GO:0016787~hydrolase activity,
LOC105428486	LHFPL tetraspan subfamily member 6 protein-like(LOC105428486)	Pogonomyrmex barbatus		GO:0016020~membrane,
LOC105434365	LIM domain only protein 3-like(LOC105434365)	Pogonomyrmex barbatus	GO:0045944~positive regulation of transcription by RNA polymerase II,	GO:0005634~nucleus,	GO:0003713~transcription coactivator activity,GO:0046872~metal ion binding,GO:0140297~DNA-binding transcription factor binding,
LOC105429124	LIM homeobox transcription factor 1-beta-like(LOC105429124)	Pogonomyrmex barbatus	GO:0006357~regulation of transcription by RNA polymerase II,GO:0030182~neuron differentiation,	GO:0005634~nucleus,	GO:0000977~RNA polymerase II transcription regulatory region sequence-specific DNA binding,GO:0000981~DNA-binding transcription factor activity, RNA polymerase II-specific,GO:0046872~metal ion binding,
LOC105433259	Ligand-gated chloride channel homolog 3(Lcch3)	Pogonomyrmex barbatus	GO:0007165~signal transduction,GO:0007268~chemical synaptic transmission,GO:0034220~monoatomic ion transmembrane transport,GO:0042391~regulation of membrane potential,GO:0050877~nervous system process,	GO:0016020~membrane,GO:0034707~chloride channel complex,GO:0043005~neuron projection,GO:0045202~synapse,GO:0045211~postsynaptic membrane,GO:1902711~GABA-A receptor complex,	GO:0004890~GABA-A receptor activity,GO:0005230~extracellular ligand-gated monoatomic ion channel activity,GO:0005254~chloride channel activity,GO:0030594~neurotransmitter receptor activity,GO:0099095~ligand-gated monoatomic anion channel activity,	pbar04080:Neuroactive ligand-receptor interaction,
LOC105430571	Linear Ubiquitin E3 ligase(LUBEL)	Pogonomyrmex barbatus	GO:0097039~protein linear polyubiquitination,	GO:0071797~LUBAC complex,	GO:0008270~zinc ion binding,GO:0036435~K48-linked polyubiquitin modification-dependent protein binding,GO:0061630~ubiquitin protein ligase activity,GO:0070530~K63-linked polyubiquitin modification-dependent protein binding,GO:1990450~linear polyubiquitin binding,
LOC105431142	MD-2-related lipid-recognition protein-like(LOC105431142)	Pogonomyrmex barbatus	GO:0015918~sterol transport,		GO:0032934~sterol binding,	pbar04142:Lysosome,
LOC105426175	MLX interacting protein mondo(Mondo)	Pogonomyrmex barbatus	GO:0006357~regulation of transcription by RNA polymerase II,	GO:0005634~nucleus,GO:0005737~cytoplasm,	GO:0000978~RNA polymerase II cis-regulatory region sequence-specific DNA binding,GO:0000981~DNA-binding transcription factor activity, RNA polymerase II-specific,GO:0046983~protein dimerization activity,
LOC105424383	Matrix metalloproteinase 1(Mmp1)	Pogonomyrmex barbatus	GO:0006508~proteolysis,GO:0030198~extracellular matrix organization,GO:0030574~collagen catabolic process,	GO:0005615~extracellular space,GO:0031012~extracellular matrix,	GO:0004222~metalloendopeptidase activity,GO:0008270~zinc ion binding,
LOC105425915	Mid1(Mid1)	Pogonomyrmex barbatus	GO:0098703~calcium ion import across plasma membrane,	GO:0005886~plasma membrane,	GO:0015275~stretch-activated, monoatomic cation-selective, calcium channel activity,
LOC105429215	Mitogen-activated protein kinase phosphatase 3(Mkp3)	Pogonomyrmex barbatus	GO:0006470~protein dephosphorylation,GO:0043409~negative regulation of MAPK cascade,	GO:0005634~nucleus,GO:0005737~cytoplasm,GO:0005829~cytosol,	GO:0008330~protein tyrosine/threonine phosphatase activity,GO:0017017~MAP kinase tyrosine/serine/threonine phosphatase activity,GO:0017018~myosin phosphatase activity,GO:0033192~calmodulin-dependent protein phosphatase activity,GO:0033550~MAP kinase tyrosine phosphatase activity,GO:0140791~histone H2AXS140 phosphatase activity,GO:0180004~RNA polymerase II CTD heptapeptide repeat Y1 phosphatase ac…	pbar04148:Efferocytosis,
LOC105427084	Moesin(Moe)	Pogonomyrmex barbatus	GO:0008360~regulation of cell shape,GO:0009887~animal organ morphogenesis,GO:0030182~neuron differentiation,GO:1902115~regulation of organelle assembly,GO:1902966~positive regulation of protein localization to early endosome,GO:2000643~positive regulation of early endosome to late endosome transport,	GO:0005856~cytoskeleton,GO:0005886~plasma membrane,GO:0005902~microvillus,GO:0005912~adherens junction,GO:0016028~rhabdomere,GO:0030175~filopodium,GO:0045177~apical part of cell,	GO:0003779~actin binding,GO:0050839~cell adhesion molecule binding,
LOC105427350	Myo-inositol oxygenase(Miox)	Pogonomyrmex barbatus	GO:0019310~inositol catabolic process,	GO:0005737~cytoplasm,	GO:0005506~iron ion binding,GO:0050113~inositol oxygenase activity,	pbar00053:Ascorbate and aldarate metabolism,pbar00562:Inositol phosphate metabolism,pbar01100:Metabolic pathways,pbar01250:Biosynthesis of nucleotide sugars,
LOC105428560	Myosin 81F(Myo81F)	Pogonomyrmex barbatus	GO:0009887~animal organ morphogenesis,GO:0030182~neuron differentiation,	GO:0005737~cytoplasm,GO:0005856~cytoskeleton,GO:0016459~myosin complex,GO:0071944~cell periphery,	GO:0003774~cytoskeletal motor activity,GO:0003779~actin binding,GO:0005515~protein binding,GO:0005524~ATP binding,
LOC105433795	Myosuppressin receptor 1(MsR1)	Pogonomyrmex barbatus	GO:0007186~G protein-coupled receptor signaling pathway,	GO:0005886~plasma membrane,GO:0016020~membrane,	GO:0008528~G protein-coupled peptide receptor activity,
LOC105433152	N-acetylglucosamine kinase(Nagk)	Pogonomyrmex barbatus			GO:0045127~N-acetylglucosamine kinase activity,	pbar00520:Amino sugar and nucleotide sugar metabolism,pbar01100:Metabolic pathways,pbar01250:Biosynthesis of nucleotide sugars,
LOC105434001	NAD synthetase(Nadsyn)	Pogonomyrmex barbatus	GO:0009435~NAD biosynthetic process,	GO:0005737~cytoplasm,	GO:0003952~NAD+ synthase (glutamine-hydrolyzing) activity,GO:0004359~glutaminase activity,GO:0005524~ATP binding,	pbar00760:Nicotinate and nicotinamide metabolism,pbar01100:Metabolic pathways,pbar01240:Biosynthesis of cofactors,
LOC105423289	NADH-cytochrome b5 reductase-like(LOC105423289)	Pogonomyrmex barbatus			GO:0016491~oxidoreductase activity,
LOC105434122	NMDA receptor 1(Nmdar1)	Pogonomyrmex barbatus	GO:0006811~monoatomic ion transport,GO:0007268~chemical synaptic transmission,GO:0035235~ionotropic glutamate receptor signaling pathway,GO:0042391~regulation of membrane potential,	GO:0005886~plasma membrane,GO:0014069~postsynaptic density,GO:0017146~NMDA selective glutamate receptor complex,GO:0043005~neuron projection,GO:0045202~synapse,GO:0045211~postsynaptic membrane,	GO:0004972~NMDA glutamate receptor activity,GO:0015276~ligand-gated monoatomic ion channel activity,GO:0038023~signaling receptor activity,	pbar04080:Neuroactive ligand-receptor interaction,
LOC105423729	Na[+]-dependent inorganic phosphate cotransporter(NaPi-T)	Pogonomyrmex barbatus	GO:0006820~monoatomic anion transport,GO:0055085~transmembrane transport,	GO:0005886~plasma membrane,GO:0016020~membrane,	GO:0022857~transmembrane transporter activity,	pbar04142:Lysosome,
LOC105429517	Na[+]-driven anion exchanger 1(Ndae1)	Pogonomyrmex barbatus	GO:0006820~monoatomic anion transport,GO:0015701~bicarbonate transport,GO:0051453~regulation of intracellular pH,GO:0055085~transmembrane transport,	GO:0005886~plasma membrane,GO:0016323~basolateral plasma membrane,	GO:0005452~solute:inorganic anion antiporter activity,GO:0008509~monoatomic anion transmembrane transporter activity,GO:0008510~sodium:bicarbonate symporter activity,
LOC105433923	Na[+]/H[+] hydrogen exchanger 2(Nhe2)	Pogonomyrmex barbatus	GO:0006814~sodium ion transport,GO:0006885~regulation of pH,GO:0051453~regulation of intracellular pH,GO:0098719~sodium ion import across plasma membrane,GO:1902600~proton transmembrane transport,	GO:0005886~plasma membrane,GO:0016020~membrane,	GO:0015385~sodium:proton antiporter activity,GO:0015386~potassium:proton antiporter activity,
LOC105434244	Neuropeptide-like precursor 1(Nplp1)	Pogonomyrmex barbatus	GO:0007218~neuropeptide signaling pathway,
LOC105432317	Neuropilin and tolloid-like(Neto)	Pogonomyrmex barbatus		GO:0016020~membrane,	GO:0005515~protein binding,
LOC105432905	Nitric oxide synthase(Nos)	Pogonomyrmex barbatus	GO:0006809~nitric oxide biosynthetic process,		GO:0004517~nitric-oxide synthase activity,GO:0005516~calmodulin binding,GO:0010181~FMN binding,GO:0020037~heme binding,GO:0046872~metal ion binding,GO:0050660~flavin adenine dinucleotide binding,GO:0050661~NADP binding,	pbar00220:Arginine biosynthesis,pbar00330:Arginine and proline metabolism,pbar01100:Metabolic pathways,pbar04081:Hormone signaling,pbar04145:Phagosome,
LOC105426801	Notopleural(Np)	Pogonomyrmex barbatus	GO:0006508~proteolysis,	GO:0016020~membrane,	GO:0004252~serine-type endopeptidase activity,
LOC105433153	Nuclear hormone receptor HR96(Hr96)	Pogonomyrmex barbatus	GO:0000122~negative regulation of transcription by RNA polymerase II,GO:0030154~cell differentiation,GO:0045944~positive regulation of transcription by RNA polymerase II,	GO:0005634~nucleus,	GO:0000978~RNA polymerase II cis-regulatory region sequence-specific DNA binding,GO:0004879~nuclear receptor activity,GO:0008270~zinc ion binding,
LOC105432437	Octopamine receptor in mushroom bodies(Oamb)	Pogonomyrmex barbatus	GO:0071880~adenylate cyclase-activating adrenergic receptor signaling pathway,	GO:0005886~plasma membrane,GO:0016020~membrane,	GO:0004930~G protein-coupled receptor activity,GO:0008227~G protein-coupled amine receptor activity,
LOC105422216	Organic anion transporting polypeptide 26F(Oatp26F)	Pogonomyrmex barbatus	GO:0006811~monoatomic ion transport,GO:0043252~sodium-independent organic anion transport,GO:0055085~transmembrane transport,	GO:0016020~membrane,GO:0016323~basolateral plasma membrane,	GO:0005515~protein binding,GO:0015347~sodium-independent organic anion transmembrane transporter activity,
LOC105428922	Organic anion transporting polypeptide 58Dc(Oatp58Dc)	Pogonomyrmex barbatus	GO:0006811~monoatomic ion transport,GO:0043252~sodium-independent organic anion transport,GO:0055085~transmembrane transport,	GO:0016020~membrane,GO:0016323~basolateral plasma membrane,	GO:0005515~protein binding,GO:0015347~sodium-independent organic anion transmembrane transporter activity,
LOC105428761	Organic cation transporter(Orct)	Pogonomyrmex barbatus	GO:0055085~transmembrane transport,	GO:0016020~membrane,	GO:0022857~transmembrane transporter activity,
LOC105428313	Otopetrin-like a(OtopLa)	Pogonomyrmex barbatus	GO:1902600~proton transmembrane transport,	GO:0005886~plasma membrane,GO:0016020~membrane,	GO:0015252~proton channel activity,
LOC105433983	PDZ domain-containing protein sprite(sprt)	Pogonomyrmex barbatus			GO:0005515~protein binding,	pbar00920:Sulfur metabolism,pbar01100:Metabolic pathways,
LOC105422047	Peroxidasin(Pxn)	Pogonomyrmex barbatus	GO:0006979~response to oxidative stress,	GO:0005615~extracellular space,GO:0071944~cell periphery,	GO:0004601~peroxidase activity,GO:0005515~protein binding,GO:0020037~heme binding,GO:0046872~metal ion binding,GO:0140825~lactoperoxidase activity,
LOC105434284	Phospholipase C at 21C(Plc21C)	Pogonomyrmex barbatus	GO:0007186~G protein-coupled receptor signaling pathway,GO:0016042~lipid catabolic process,GO:0046488~phosphatidylinositol metabolic process,GO:0048015~phosphatidylinositol-mediated signaling,GO:0051209~release of sequestered calcium ion into cytosol,	GO:0005737~cytoplasm,	GO:0004435~phosphatidylinositol phospholipase C activity,GO:0005509~calcium ion binding,	pbar00562:Inositol phosphate metabolism,pbar01100:Metabolic pathways,pbar04070:Phosphatidylinositol signaling system,pbar04081:Hormone signaling,pbar04310:Wnt signaling pathway,pbar04745:Phototransduction - fly,
LOC105430071	Phosphomevalonate kinase(Pmvk)	Pogonomyrmex barbatus	GO:0006695~cholesterol biosynthetic process,GO:0019287~isopentenyl diphosphate biosynthetic process, mevalonate pathway,	GO:0005737~cytoplasm,GO:0005829~cytosol,	GO:0004631~phosphomevalonate kinase activity,GO:0005524~ATP binding,	pbar00900:Terpenoid backbone biosynthesis,pbar01100:Metabolic pathways,pbar04146:Peroxisome,
LOC105428887	Probable cytochrome P450 304a1(Cyp304a1)	Pogonomyrmex barbatus	GO:0006082~organic acid metabolic process,GO:0006805~xenobiotic metabolic process,	GO:0005737~cytoplasm,GO:0016020~membrane,GO:0043231~intracellular membrane-bounded organelle,	GO:0004497~monooxygenase activity,GO:0005506~iron ion binding,GO:0008395~steroid hydroxylase activity,GO:0016705~oxidoreductase activity, acting on paired donors, with incorporation or reduction of molecular oxygen,GO:0016712~oxidoreductase activity, acting on paired donors, with incorporation or reduction of molecular oxygen, reduced flavin or flavoprotein as one donor, and incorporation of one …
LOC105428671	Probable cytochrome P450 4aa1(Cyp4aa1)	Pogonomyrmex barbatus		GO:0005789~endoplasmic reticulum membrane,	GO:0004497~monooxygenase activity,GO:0005506~iron ion binding,GO:0016705~oxidoreductase activity, acting on paired donors, with incorporation or reduction of molecular oxygen,GO:0020037~heme binding,
LOC105428438	Protein tyrosine phosphatase 10D(Ptp10D)	Pogonomyrmex barbatus	GO:0006470~protein dephosphorylation,GO:0009653~anatomical structure morphogenesis,GO:0048666~neuron development,	GO:0016020~membrane,	GO:0004725~protein tyrosine phosphatase activity,GO:0005515~protein binding,
LOC105423144	Protostome-specific GEF(PsGEF)	Pogonomyrmex barbatus	GO:0007165~signal transduction,	GO:0005634~nucleus,GO:0005886~plasma membrane,	GO:0005515~protein binding,
LOC105422246	Pyruvate carboxylase(PCB)	Pogonomyrmex barbatus	GO:0006090~pyruvate metabolic process,GO:0006094~gluconeogenesis,	GO:0005737~cytoplasm,	GO:0004736~pyruvate carboxylase activity,GO:0005524~ATP binding,GO:0046872~metal ion binding,	pbar00020:Citrate cycle (TCA cycle),pbar00620:Pyruvate metabolism,pbar01100:Metabolic pathways,pbar01200:Carbon metabolism,pbar01230:Biosynthesis of amino acids,
LOC105425097	RAS oncogene family member Rab3(Rab3)	Pogonomyrmex barbatus	GO:0006886~intracellular protein transport,GO:0006904~vesicle docking involved in exocytosis,GO:0009306~protein secretion,GO:0017157~regulation of exocytosis,GO:0072659~protein localization to plasma membrane,	GO:0005768~endosome,GO:0005886~plasma membrane,GO:0008021~synaptic vesicle,	GO:0003924~GTPase activity,GO:0005525~GTP binding,
LOC105429363	RNA pseudouridylate synthase domain-containing protein 2-like(LOC105429363)	Pogonomyrmex barbatus	GO:0000455~enzyme-directed rRNA pseudouridine synthesis,GO:0001522~pseudouridine synthesis,		GO:0003723~RNA binding,GO:0009982~pseudouridine synthase activity,
LOC105427895	RNA-binding protein 6(Rbp6)	Pogonomyrmex barbatus	GO:0006417~regulation of translation,	GO:0005737~cytoplasm,	GO:0003723~RNA binding,GO:0003729~mRNA binding,	pbar03015:mRNA surveillance pathway,
LOC105429725	Rab interacting lysosomal protein like(Rilpl)	Pogonomyrmex barbatus	GO:0015031~protein transport,GO:0060271~cilium assembly,	GO:0005737~cytoplasm,GO:0036064~ciliary basal body,	GO:0031267~small GTPase binding,GO:0046983~protein dimerization activity,GO:0051959~dynein light intermediate chain binding,
LOC105433188	Rab3 GDP-GTP exchange factor(Rab3-GEF)	Pogonomyrmex barbatus	GO:0006915~apoptotic process,GO:0032483~regulation of Rab protein signal transduction,GO:0042981~regulation of apoptotic process,	GO:0005829~cytosol,GO:0005886~plasma membrane,	GO:0005085~guanyl-nucleotide exchange factor activity,GO:0016301~kinase activity,
LOC105433558	Rab3 interacting molecule(Rim)	Pogonomyrmex barbatus	GO:0006886~intracellular protein transport,GO:0042391~regulation of membrane potential,GO:0048167~regulation of synaptic plasticity,GO:0048791~calcium ion-regulated exocytosis of neurotransmitter,GO:0050806~positive regulation of synaptic transmission,	GO:0042734~presynaptic membrane,GO:0048788~cytoskeleton of presynaptic active zone,	GO:0031267~small GTPase binding,GO:0044325~transmembrane transporter binding,GO:0046872~metal ion binding,
LOC105429729	Rabconnectin-3A(Rbcn-3A)	Pogonomyrmex barbatus	GO:0007035~vacuolar acidification,	GO:0043291~RAVE complex,	GO:0005515~protein binding,	pbar04142:Lysosome,
LOC105421971	Rad, Gem/Kir family member 3(Rgk3)	Pogonomyrmex barbatus		GO:0005886~plasma membrane,	GO:0003924~GTPase activity,GO:0005246~calcium channel regulator activity,GO:0005525~GTP binding,
LOC105423658	Resistant to dieldrin(Rdl)	Pogonomyrmex barbatus	GO:0007165~signal transduction,GO:0007268~chemical synaptic transmission,GO:0042391~regulation of membrane potential,GO:0050877~nervous system process,GO:1902476~chloride transmembrane transport,	GO:0016020~membrane,GO:0034707~chloride channel complex,GO:0043005~neuron projection,GO:0045202~synapse,GO:0045211~postsynaptic membrane,	GO:0004890~GABA-A receptor activity,GO:0005230~extracellular ligand-gated monoatomic ion channel activity,GO:0005254~chloride channel activity,GO:0030594~neurotransmitter receptor activity,GO:0099095~ligand-gated monoatomic anion channel activity,	pbar04080:Neuroactive ligand-receptor interaction,
LOC105423445	Rhesus blood group-associated glycoprotein Rh50(Rh50)	Pogonomyrmex barbatus	GO:0072488~ammonium transmembrane transport,GO:0097272~ammonium homeostasis,	GO:0005886~plasma membrane,	GO:0008519~ammonium channel activity,
LOC105432427	Rho-related BTB domain containing(RhoBTB)	Pogonomyrmex barbatus	GO:0007264~small GTPase-mediated signal transduction,		GO:0003924~GTPase activity,GO:0005515~protein binding,GO:0005525~GTP binding,	pbar04120:Ubiquitin mediated proteolysis,
LOC105426497	RhoGAP_ARAP and RA_ARAPs domain-containing protein RhoGAP15B(RhoGAP15B)	Pogonomyrmex barbatus	GO:0007165~signal transduction,GO:0043547~positive regulation of GTPase activity,GO:0048699~generation of neurons,	GO:0005737~cytoplasm,GO:0071944~cell periphery,	GO:0005096~GTPase activator activity,GO:0005547~phosphatidylinositol-3,4,5-trisphosphate binding,
LOC105431823	Ryanodine receptor(RyR)	Pogonomyrmex barbatus	GO:0006874~intracellular calcium ion homeostasis,GO:0006941~striated muscle contraction,GO:0014808~release of sequestered calcium ion into cytosol by sarcoplasmic reticulum,GO:0070588~calcium ion transmembrane transport,	GO:0005790~smooth endoplasmic reticulum,GO:0030018~Z disc,GO:0033017~sarcoplasmic reticulum membrane,GO:0034704~calcium channel complex,GO:0042383~sarcolemma,	GO:0005219~ryanodine-sensitive calcium-release channel activity,GO:0005515~protein binding,
LOC105426451	S-adenosylmethionine decarboxylase(SamDC)	Pogonomyrmex barbatus	GO:0006597~spermine biosynthetic process,GO:0008295~spermidine biosynthetic process,	GO:0005829~cytosol,	GO:0004014~adenosylmethionine decarboxylase activity,	pbar00270:Cysteine and methionine metabolism,pbar00330:Arginine and proline metabolism,pbar01100:Metabolic pathways,
LOC105428254	SAM_USH1G_HARP domain-containing protein Sans(Sans)	Pogonomyrmex barbatus			GO:0005515~protein binding,
LOC105422300	SCY1-like protein bma(bma)	Pogonomyrmex barbatus	GO:0006468~protein phosphorylation,		GO:0004672~protein kinase activity,GO:0005524~ATP binding,
LOC105433876	SH2B adapter-like protein Lnk(Lnk)	Pogonomyrmex barbatus	GO:0035556~intracellular signal transduction,	GO:0005886~plasma membrane,	GO:0005068~transmembrane receptor protein tyrosine kinase adaptor activity,
LOC105426315	SH3 domain-containing kinase-binding protein 1(LOC105426315)	Pogonomyrmex barbatus	GO:0007015~actin filament organization,GO:0016477~cell migration,		GO:0005515~protein binding,GO:0016301~kinase activity,
LOC112552445	SUN domain-containing protein 2-like(LOC112552445)	Pogonomyrmex barbatus	GO:0006998~nuclear envelope organization,	GO:0005635~nuclear envelope,GO:0034993~meiotic nuclear membrane microtubule tethering complex,	GO:0043495~protein-membrane adaptor activity,
LOC105433806	Sarcoplasmic calcium-binding protein 2(Scp2)	Pogonomyrmex barbatus			GO:0005509~calcium ion binding,
LOC105429695	Secretogranin_V domain-containing protein 7B2(7B2)	Pogonomyrmex barbatus	GO:0007218~neuropeptide signaling pathway,GO:0046883~regulation of hormone secretion,	GO:0005576~extracellular region,GO:0016020~membrane,GO:0030141~secretory granule,	GO:0030234~enzyme regulator activity,
LOC105422766	Shaker cognate w(Shaw)	Pogonomyrmex barbatus	GO:0001508~action potential,GO:0051260~protein homooligomerization,GO:0071805~potassium ion transmembrane transport,	GO:0008076~voltage-gated potassium channel complex,GO:0030424~axon,GO:0032590~dendrite membrane,GO:0032809~neuronal cell body membrane,GO:0042734~presynaptic membrane,GO:0043679~axon terminus,GO:0045211~postsynaptic membrane,	GO:0005251~delayed rectifier potassium channel activity,GO:0005515~protein binding,
LOC105431567	Short Calcium-binding Mitochondrial Carrier(SCaMC)	Pogonomyrmex barbatus	GO:0055085~transmembrane transport,	GO:0005743~mitochondrial inner membrane,	GO:0005347~ATP transmembrane transporter activity,GO:0005509~calcium ion binding,
LOC105434125	Silnoon(Sln)	Pogonomyrmex barbatus	GO:0015718~monocarboxylic acid transport,GO:0055085~transmembrane transport,	GO:0016020~membrane,	GO:0008028~monocarboxylic acid transmembrane transporter activity,
LOC105429934	Snakeskin(Ssk)	Pogonomyrmex barbatus	GO:0019991~septate junction assembly,	GO:0005886~plasma membrane,
LOC105434279	Stork-head domain-containing protein knockout(knockout)	Pogonomyrmex barbatus	GO:0006357~regulation of transcription by RNA polymerase II,GO:0045944~positive regulation of transcription by RNA polymerase II,	GO:0005634~nucleus,GO:0005737~cytoplasm,	GO:0000977~RNA polymerase II transcription regulatory region sequence-specific DNA binding,GO:0001228~DNA-binding transcription activator activity, RNA polymerase II-specific,
LOC105429884	Syntrophin-like 2(Syn2)	Pogonomyrmex barbatus		GO:0005622~intracellular anatomical structure,GO:0005856~cytoskeleton,GO:0016010~dystrophin-associated glycoprotein complex,	GO:0005198~structural molecule activity,GO:0005515~protein binding,
LOC105423564	T-box transcription factor TBX1-A(LOC105423564)	Pogonomyrmex barbatus	GO:0001708~cell fate specification,GO:0006357~regulation of transcription by RNA polymerase II,GO:0045893~positive regulation of DNA-templated transcription,	GO:0000785~chromatin,GO:0005634~nucleus,	GO:0000978~RNA polymerase II cis-regulatory region sequence-specific DNA binding,GO:0000981~DNA-binding transcription factor activity, RNA polymerase II-specific,
LOC105432026	T-box transcription factor TBX20-like(LOC105432026)	Pogonomyrmex barbatus	GO:0001708~cell fate specification,GO:0006357~regulation of transcription by RNA polymerase II,GO:0007507~heart development,GO:0045893~positive regulation of DNA-templated transcription,	GO:0000785~chromatin,GO:0005634~nucleus,	GO:0000978~RNA polymerase II cis-regulatory region sequence-specific DNA binding,GO:0000981~DNA-binding transcription factor activity, RNA polymerase II-specific,
LOC105427468	TBC1 domain family member 15/17(Tbc1d15-17)	Pogonomyrmex barbatus	GO:0090630~activation of GTPase activity,		GO:0005096~GTPase activator activity,	pbar04137:Mitophagy - animal,
LOC105428324	Tetraspanin 5D(Tsp5D)	Pogonomyrmex barbatus		GO:0005886~plasma membrane,GO:0016020~membrane,
LOC105429085	Tetraspanin 97E(Tsp97E)	Pogonomyrmex barbatus		GO:0016020~membrane,
LOC105430495	Toll-like receptor 6(Toll-6)	Pogonomyrmex barbatus	GO:0007165~signal transduction,GO:0048468~cell development,	GO:0005886~plasma membrane,	GO:0005515~protein binding,	pbar04624:Toll and Imd signaling pathway,
LOC105422097	Toll-like receptor 7(Toll-7)	Pogonomyrmex barbatus	GO:0007165~signal transduction,	GO:0005886~plasma membrane,	GO:0005515~protein binding,	pbar04624:Toll and Imd signaling pathway,
LOC105433547	Toll-like receptor Tollo(Tollo)	Pogonomyrmex barbatus	GO:0007165~signal transduction,GO:0048468~cell development,	GO:0005886~plasma membrane,	GO:0005515~protein binding,GO:0038023~signaling receptor activity,	pbar04624:Toll and Imd signaling pathway,
LOC105432304	Transmembrane O-mannosyltransferase targeting cadherins 2(Tmtc2)	Pogonomyrmex barbatus	GO:0035269~protein O-linked mannosylation,	GO:0005789~endoplasmic reticulum membrane,	GO:0000030~mannosyltransferase activity,GO:0004169~dolichyl-phosphate-mannose-protein mannosyltransferase activity,GO:0005515~protein binding,
LOC105433322	Tryptophan 2,3-dioxygenase vermilion(vermilion)	Pogonomyrmex barbatus	GO:0006727~ommochrome biosynthetic process,GO:0019441~L-tryptophan catabolic process to kynurenine,GO:0019442~L-tryptophan catabolic process to acetyl-CoA,		GO:0004833~tryptophan 2,3-dioxygenase activity,GO:0020037~heme binding,GO:0046872~metal ion binding,	pbar00380:Tryptophan metabolism,pbar01100:Metabolic pathways,pbar01240:Biosynthesis of cofactors,
LOC105434118	Tyramine beta hydroxylase(Tbh)	Pogonomyrmex barbatus	GO:0006589~octopamine biosynthetic process,GO:0042420~dopamine catabolic process,GO:0042421~norepinephrine biosynthetic process,	GO:0005615~extracellular space,GO:0030667~secretory granule membrane,	GO:0004500~dopamine beta-monooxygenase activity,GO:0005507~copper ion binding,	pbar00350:Tyrosine metabolism,pbar01100:Metabolic pathways,
LOC105422146	UDP-glucuronosyltransferase 1-9-like(LOC105422146)	Pogonomyrmex barbatus		GO:0016020~membrane,	GO:0008194~UDP-glycosyltransferase activity,GO:0015020~glucuronosyltransferase activity,	pbar00040:Pentose and glucuronate interconversions,pbar00053:Ascorbate and aldarate metabolism,pbar00830:Retinol metabolism,pbar00860:Porphyrin metabolism,pbar00980:Metabolism of xenobiotics by cytochrome P450,pbar00982:Drug metabolism - cytochrome P450,pbar00983:Drug metabolism - other enzymes,pbar01100:Metabolic pathways,pbar01240:Biosynthesis of cofactors,
LOC105428020	UDP-glucuronosyltransferase 2B15-like(LOC105428020)	Pogonomyrmex barbatus		GO:0016020~membrane,	GO:0008194~UDP-glycosyltransferase activity,GO:0015020~glucuronosyltransferase activity,	pbar00040:Pentose and glucuronate interconversions,pbar00053:Ascorbate and aldarate metabolism,pbar00830:Retinol metabolism,pbar00860:Porphyrin metabolism,pbar00980:Metabolism of xenobiotics by cytochrome P450,pbar00982:Drug metabolism - cytochrome P450,pbar00983:Drug metabolism - other enzymes,pbar01100:Metabolic pathways,pbar01240:Biosynthesis of cofactors,
LOC105429742	UNC-79 domain-containing protein(unc79)	Pogonomyrmex barbatus			GO:0005515~protein binding,
LOC105421984	UNC93-like protein(LOC105421984)	Pogonomyrmex barbatus	GO:0006937~regulation of muscle contraction,GO:0043266~regulation of potassium ion transport,	GO:0005886~plasma membrane,GO:0055120~striated muscle dense body,	GO:0015459~potassium channel regulator activity,
LOC105423680	UNC93-like protein(LOC105423680)	Pogonomyrmex barbatus	GO:0006937~regulation of muscle contraction,GO:0043266~regulation of potassium ion transport,	GO:0005886~plasma membrane,GO:0055120~striated muscle dense body,	GO:0015459~potassium channel regulator activity,
LOC105432726	UNC93-like protein(LOC105432726)	Pogonomyrmex barbatus	GO:0006937~regulation of muscle contraction,GO:0043266~regulation of potassium ion transport,	GO:0005886~plasma membrane,GO:0055120~striated muscle dense body,	GO:0015459~potassium channel regulator activity,
LOC105430221	V-type ATPase subunit a family protein Vha100-1(Vha100-1)	Pogonomyrmex barbatus	GO:0007035~vacuolar acidification,GO:1902600~proton transmembrane transport,	GO:0000220~vacuolar proton-transporting V-type ATPase, V0 domain,GO:0005886~plasma membrane,GO:0016471~vacuolar proton-transporting V-type ATPase complex,	GO:0046961~proton-transporting ATPase activity, rotational mechanism,GO:0051117~ATPase binding,	pbar00190:Oxidative phosphorylation,pbar01100:Metabolic pathways,pbar04142:Lysosome,pbar04145:Phagosome,
LOC105430950	V-type ATPase subunit a family protein Vha100-2(Vha100-2)	Pogonomyrmex barbatus	GO:0007035~vacuolar acidification,GO:1902600~proton transmembrane transport,	GO:0000220~vacuolar proton-transporting V-type ATPase, V0 domain,GO:0005886~plasma membrane,GO:0016471~vacuolar proton-transporting V-type ATPase complex,	GO:0046961~proton-transporting ATPase activity, rotational mechanism,GO:0051117~ATPase binding,	pbar00190:Oxidative phosphorylation,pbar01100:Metabolic pathways,pbar04142:Lysosome,pbar04145:Phagosome,
LOC105428407	V-type proton ATPase catalytic subunit A(LOC105428407)	Pogonomyrmex barbatus	GO:0046034~ATP metabolic process,GO:1902600~proton transmembrane transport,	GO:0005765~lysosomal membrane,GO:0033180~proton-transporting V-type ATPase, V1 domain,	GO:0005524~ATP binding,GO:0016887~ATP hydrolysis activity,GO:0046933~proton-transporting ATP synthase activity, rotational mechanism,GO:0046961~proton-transporting ATPase activity, rotational mechanism,	pbar00190:Oxidative phosphorylation,pbar01100:Metabolic pathways,pbar04145:Phagosome,pbar04150:mTOR signaling pathway,
LOC105431359	V-type proton ATPase subunit Vha13(Vha13)	Pogonomyrmex barbatus	GO:0097401~synaptic vesicle lumen acidification,GO:1902600~proton transmembrane transport,	GO:0000221~vacuolar proton-transporting V-type ATPase, V1 domain,GO:0016471~vacuolar proton-transporting V-type ATPase complex,GO:0098793~presynapse,	GO:0016887~ATP hydrolysis activity,GO:0046961~proton-transporting ATPase activity, rotational mechanism,	pbar00190:Oxidative phosphorylation,pbar01100:Metabolic pathways,pbar04145:Phagosome,pbar04150:mTOR signaling pathway,
LOC105426346	V-type proton ATPase subunit Vha26(Vha26)	Pogonomyrmex barbatus	GO:1902600~proton transmembrane transport,	GO:0033178~proton-transporting two-sector ATPase complex, catalytic domain,	GO:0046961~proton-transporting ATPase activity, rotational mechanism,	pbar00190:Oxidative phosphorylation,pbar01100:Metabolic pathways,pbar04145:Phagosome,pbar04150:mTOR signaling pathway,
LOC105423247	V-type proton ATPase subunit Vha44(Vha44)	Pogonomyrmex barbatus	GO:1902600~proton transmembrane transport,	GO:0000221~vacuolar proton-transporting V-type ATPase, V1 domain,GO:0005765~lysosomal membrane,	GO:0046961~proton-transporting ATPase activity, rotational mechanism,	pbar00190:Oxidative phosphorylation,pbar01100:Metabolic pathways,pbar04145:Phagosome,pbar04150:mTOR signaling pathway,
LOC105430086	V-type proton ATPase subunit Vha55(Vha55)	Pogonomyrmex barbatus	GO:0007035~vacuolar acidification,GO:0046034~ATP metabolic process,GO:1902600~proton transmembrane transport,	GO:0033180~proton-transporting V-type ATPase, V1 domain,	GO:0005524~ATP binding,GO:0046961~proton-transporting ATPase activity, rotational mechanism,	pbar00190:Oxidative phosphorylation,pbar01100:Metabolic pathways,pbar04145:Phagosome,pbar04150:mTOR signaling pathway,
LOC105426637	V-type proton ATPase subunit VhaAC39-1(VhaAC39-1)	Pogonomyrmex barbatus	GO:0007034~vacuolar transport,GO:0007035~vacuolar acidification,GO:1902600~proton transmembrane transport,	GO:0005765~lysosomal membrane,GO:0005769~early endosome,GO:0016471~vacuolar proton-transporting V-type ATPase complex,GO:0033179~proton-transporting V-type ATPase, V0 domain,GO:0033181~plasma membrane proton-transporting V-type ATPase complex,	GO:0046961~proton-transporting ATPase activity, rotational mechanism,	pbar00190:Oxidative phosphorylation,pbar01100:Metabolic pathways,pbar04142:Lysosome,pbar04145:Phagosome,
LOC105426996	V-type proton ATPase subunit VhaSFD(VhaSFD)	Pogonomyrmex barbatus	GO:1902600~proton transmembrane transport,	GO:0000221~vacuolar proton-transporting V-type ATPase, V1 domain,GO:0005765~lysosomal membrane,	GO:0005515~protein binding,GO:0046961~proton-transporting ATPase activity, rotational mechanism,	pbar00190:Oxidative phosphorylation,pbar01100:Metabolic pathways,pbar04142:Lysosome,pbar04145:Phagosome,pbar04150:mTOR signaling pathway,
LOC105428957	V-type proton ATPase subunit e 2-like(LOC105428957)	Pogonomyrmex barbatus	GO:1902600~proton transmembrane transport,	GO:0012505~endomembrane system,GO:0033179~proton-transporting V-type ATPase, V0 domain,GO:0033181~plasma membrane proton-transporting V-type ATPase complex,	GO:0046961~proton-transporting ATPase activity, rotational mechanism,	pbar00190:Oxidative phosphorylation,pbar01100:Metabolic pathways,pbar04145:Phagosome,
LOC112552639	Vesicular acetylcholine transporter(VAChT)	Pogonomyrmex barbatus	GO:0007268~chemical synaptic transmission,GO:0042908~xenobiotic transport,GO:0055085~transmembrane transport,	GO:0016020~membrane,GO:0030121~AP-1 adaptor complex,GO:0030122~AP-2 adaptor complex,GO:0043195~terminal bouton,	GO:0005277~acetylcholine transmembrane transporter activity,GO:0042910~xenobiotic transmembrane transporter activity,
LOC105429696	Vesicular glutamate transporter(VGlut)	Pogonomyrmex barbatus	GO:0006820~monoatomic anion transport,GO:0035249~synaptic transmission, glutamatergic,GO:0050803~regulation of synapse structure or activity,GO:0055085~transmembrane transport,GO:0098700~neurotransmitter loading into synaptic vesicle,	GO:0030672~synaptic vesicle membrane,GO:0060076~excitatory synapse,	GO:0005313~L-glutamate transmembrane transporter activity,GO:0005326~neurotransmitter transmembrane transporter activity,
LOC105422905	WD repeat, SAM and U-box domain-containing protein 1-like(LOC105422905)	Pogonomyrmex barbatus	GO:0016567~protein ubiquitination,		GO:0004842~ubiquitin-protein transferase activity,GO:0005515~protein binding,
LOC105430026	WD40 superfamily protein Tusp(Tusp)	Pogonomyrmex barbatus			GO:0005515~protein binding,
LOC105426454	acetylcholinesterase-like(LOC105426454)	Pogonomyrmex barbatus	GO:0006581~acetylcholine catabolic process,GO:0019695~choline metabolic process,	GO:0005615~extracellular space,GO:0005886~plasma membrane,	GO:0003990~acetylcholinesterase activity,	pbar00564:Glycerophospholipid metabolism,
LOC105428683	actin related protein 1(Arp1)	Pogonomyrmex barbatus	GO:0000281~mitotic cytokinesis,	GO:0005737~cytoplasm,GO:0005856~cytoskeleton,		pbar03082:ATP-dependent chromatin remodeling,pbar04145:Phagosome,pbar04391:Hippo signaling pathway - fly,pbar04745:Phototransduction - fly,pbar04814:Motor proteins,pbar04820:Cytoskeleton in muscle cells,pbar05100:Bacterial invasion of epithelial cells,
LOC105427419	acyl-CoA Delta(11) desaturase(LOC105427419)	Pogonomyrmex barbatus	GO:0006636~unsaturated fatty acid biosynthetic process,	GO:0005789~endoplasmic reticulum membrane,	GO:0004768~stearoyl-CoA 9-desaturase activity,GO:0005506~iron ion binding,	pbar01040:Biosynthesis of unsaturated fatty acids,pbar01100:Metabolic pathways,pbar01212:Fatty acid metabolism,
LOC105427511	acyl-CoA Delta(11) desaturase-like(LOC105427511)	Pogonomyrmex barbatus	GO:0006636~unsaturated fatty acid biosynthetic process,	GO:0005789~endoplasmic reticulum membrane,	GO:0004768~stearoyl-CoA 9-desaturase activity,GO:0005506~iron ion binding,	pbar01040:Biosynthesis of unsaturated fatty acids,pbar01100:Metabolic pathways,pbar01212:Fatty acid metabolism,
LOC105428201	acyl-CoA synthetase short-chain family member 3, mitochondrial(LOC105428201)	Pogonomyrmex barbatus		GO:0005759~mitochondrial matrix,	GO:0050218~propionate-CoA ligase activity,	pbar00640:Propanoate metabolism,pbar01100:Metabolic pathways,
LOC105424637	acyl-CoA-binding protein homolog(LOC105424637)	Pogonomyrmex barbatus	GO:0006631~fatty acid metabolic process,		GO:0000062~fatty-acyl-CoA binding,GO:0036042~long-chain fatty acyl-CoA binding,
LOC105422899	adenosine deaminase 2-like(LOC105422899)	Pogonomyrmex barbatus	GO:0006154~adenosine catabolic process,GO:0046103~inosine biosynthetic process,	GO:0005615~extracellular space,	GO:0004000~adenosine deaminase activity,GO:0046936~2'-deoxyadenosine deaminase activity,	pbar00230:Purine metabolism,pbar01100:Metabolic pathways,pbar01232:Nucleotide metabolism,
LOC105427765	adenosine receptor A2b-like(LOC105427765)	Pogonomyrmex barbatus	GO:0001973~G protein-coupled adenosine receptor signaling pathway,GO:0007189~adenylate cyclase-activating G protein-coupled receptor signaling pathway,	GO:0005886~plasma membrane,GO:0016020~membrane,	GO:0004930~G protein-coupled receptor activity,	pbar04080:Neuroactive ligand-receptor interaction,
LOC105427823	adenylate cyclase 3(Ac3)	Pogonomyrmex barbatus	GO:0006171~cAMP biosynthetic process,GO:0007189~adenylate cyclase-activating G protein-coupled receptor signaling pathway,GO:0035556~intracellular signal transduction,	GO:0005886~plasma membrane,	GO:0004016~adenylate cyclase activity,GO:0005524~ATP binding,GO:0046872~metal ion binding,	pbar00230:Purine metabolism,pbar01100:Metabolic pathways,pbar04081:Hormone signaling,pbar04213:Longevity regulating pathway - multiple species,
LOC105430765	adenylate cyclase type 6(LOC105430765)	Pogonomyrmex barbatus	GO:0006171~cAMP biosynthetic process,GO:0007189~adenylate cyclase-activating G protein-coupled receptor signaling pathway,GO:0007193~adenylate cyclase-inhibiting G protein-coupled receptor signaling pathway,GO:0035556~intracellular signal transduction,	GO:0005886~plasma membrane,	GO:0004016~adenylate cyclase activity,GO:0005524~ATP binding,GO:0046872~metal ion binding,	pbar00230:Purine metabolism,pbar01100:Metabolic pathways,pbar04081:Hormone signaling,pbar04213:Longevity regulating pathway - multiple species,
LOC105427286	adenylate kinase isoenzyme 5(LOC105427286)	Pogonomyrmex barbatus	GO:0006139~nucleobase-containing compound metabolic process,GO:0009142~nucleoside triphosphate biosynthetic process,	GO:0005737~cytoplasm,GO:0005829~cytosol,	GO:0004017~adenylate kinase activity,GO:0005524~ATP binding,GO:0019205~nucleobase-containing compound kinase activity,
LOC105425253	adenylyl cyclase 78C(Adcy8)	Pogonomyrmex barbatus	GO:0006171~cAMP biosynthetic process,GO:0007189~adenylate cyclase-activating G protein-coupled receptor signaling pathway,GO:0035556~intracellular signal transduction,	GO:0005886~plasma membrane,	GO:0004016~adenylate cyclase activity,GO:0005524~ATP binding,GO:0046872~metal ion binding,	pbar00230:Purine metabolism,pbar01100:Metabolic pathways,pbar04081:Hormone signaling,pbar04213:Longevity regulating pathway - multiple species,
LOC105423285	agrin-like(LOC105423285)	Pogonomyrmex barbatus	GO:0009653~anatomical structure morphogenesis,GO:0030154~cell differentiation,GO:0048513~animal organ development,GO:0048731~system development,	GO:0005576~extracellular region,GO:0016020~membrane,	GO:0005509~calcium ion binding,GO:0005515~protein binding,	pbar04512:ECM-receptor interaction,pbar04820:Cytoskeleton in muscle cells,
LOC105425367	alanine--glyoxylate aminotransferase 2-like(LOC105425367)	Pogonomyrmex barbatus		GO:0005739~mitochondrion,	GO:0008483~transaminase activity,GO:0030170~pyridoxal phosphate binding,	pbar00564:Glycerophospholipid metabolism,pbar01100:Metabolic pathways,
LOC105434315	alkaline phosphatase 4-like(LOC105434315)	Pogonomyrmex barbatus	GO:0016311~dephosphorylation,	GO:0016020~membrane,	GO:0004035~alkaline phosphatase activity,GO:0046872~metal ion binding,	pbar00730:Thiamine metabolism,pbar00790:Folate biosynthesis,pbar01100:Metabolic pathways,pbar01240:Biosynthesis of cofactors,
LOC105426712	allatotropin-like(LOC105426712)	Pogonomyrmex barbatus		GO:0016020~membrane,
LOC105430378	allnighter(aln)	Pogonomyrmex barbatus		GO:0005789~endoplasmic reticulum membrane,
LOC105426955	alpha-Mannosidase class I a(alpha-Man-Ia)	Pogonomyrmex barbatus	GO:0005975~carbohydrate metabolic process,GO:0006491~N-glycan processing,	GO:0000139~Golgi membrane,GO:0005783~endoplasmic reticulum,	GO:0004571~mannosyl-oligosaccharide 1,2-alpha-mannosidase activity,GO:0005509~calcium ion binding,	pbar00510:N-Glycan biosynthesis,pbar00513:Various types of N-glycan biosynthesis,pbar01100:Metabolic pathways,pbar04141:Protein processing in endoplasmic reticulum,
LOC105428642	alpha-amylase 1-like(LOC105428642)	Pogonomyrmex barbatus	GO:0005975~carbohydrate metabolic process,		GO:0004556~alpha-amylase activity,GO:0043169~cation binding,GO:0046872~metal ion binding,	pbar00500:Starch and sucrose metabolism,pbar01100:Metabolic pathways,
LOC105428643	alpha-amylase(LOC105428643)	Pogonomyrmex barbatus	GO:0005975~carbohydrate metabolic process,		GO:0004556~alpha-amylase activity,GO:0043169~cation binding,GO:0046872~metal ion binding,	pbar00500:Starch and sucrose metabolism,pbar01100:Metabolic pathways,
LOC112552182	alpha-amylase-like(LOC112552182)	Pogonomyrmex barbatus	GO:0005975~carbohydrate metabolic process,		GO:0004556~alpha-amylase activity,GO:0043169~cation binding,GO:0046872~metal ion binding,
LOC105433710	alpha-tocopherol transfer protein-like(LOC105433710)	Pogonomyrmex barbatus		GO:0016020~membrane,	GO:1902936~phosphatidylinositol bisphosphate binding,
LOC105434046	alpha-tocopherol transfer protein-like(LOC105434046)	Pogonomyrmex barbatus		GO:0016020~membrane,	GO:1902936~phosphatidylinositol bisphosphate binding,
LOC105425604	aminomethyltransferase, mitochondrial(LOC105425604)	Pogonomyrmex barbatus	GO:0006546~glycine catabolic process,	GO:0005739~mitochondrion,GO:0005960~glycine cleavage complex,	GO:0004047~aminomethyltransferase activity,GO:0005515~protein binding,GO:0008483~transaminase activity,	pbar00260:Glycine, serine and threonine metabolism,pbar00630:Glyoxylate and dicarboxylate metabolism,pbar00670:One carbon pool by folate,pbar00785:Lipoic acid metabolism,pbar01100:Metabolic pathways,pbar01200:Carbon metabolism,
LOC105429175	aminopeptidase N(LOC105429175)	Pogonomyrmex barbatus	GO:0006508~proteolysis,GO:0043171~peptide catabolic process,	GO:0005615~extracellular space,GO:0005737~cytoplasm,GO:0005886~plasma membrane,GO:0098552~side of membrane,	GO:0004177~aminopeptidase activity,GO:0008237~metallopeptidase activity,GO:0008270~zinc ion binding,GO:0042277~peptide binding,GO:0070006~metalloaminopeptidase activity,	pbar00480:Glutathione metabolism,pbar01100:Metabolic pathways,
LOC105428124	aminopeptidase N-like(LOC105428124)	Pogonomyrmex barbatus	GO:0006508~proteolysis,GO:0043171~peptide catabolic process,	GO:0005615~extracellular space,GO:0005737~cytoplasm,GO:0016020~membrane,	GO:0008270~zinc ion binding,GO:0042277~peptide binding,GO:0070006~metalloaminopeptidase activity,	pbar00480:Glutathione metabolism,pbar01100:Metabolic pathways,
LOC105426716	amontillado(amon)	Pogonomyrmex barbatus	GO:0016485~protein processing,GO:0016486~peptide hormone processing,	GO:0000139~Golgi membrane,GO:0005615~extracellular space,GO:0005802~trans-Golgi network,GO:0016020~membrane,GO:0043005~neuron projection,	GO:0004252~serine-type endopeptidase activity,
LOC105425533	androgen-induced gene 1 protein-like(LOC105425533)	Pogonomyrmex barbatus		GO:0012505~endomembrane system,GO:0016020~membrane,
LOC105429743	angiopoietin-2(LOC105429743)	Pogonomyrmex barbatus		GO:0005615~extracellular space,GO:0062023~collagen-containing extracellular matrix,
LOC105427913	angiotensin-converting enzyme Ance-3(Ance-3)	Pogonomyrmex barbatus	GO:0006508~proteolysis,	GO:0005886~plasma membrane,	GO:0004180~carboxypeptidase activity,GO:0008237~metallopeptidase activity,GO:0008241~peptidyl-dipeptidase activity,GO:0046872~metal ion binding,
LOC105423690	angiotensin-converting enzyme-like(LOC105423690)	Pogonomyrmex barbatus	GO:0006508~proteolysis,	GO:0005615~extracellular space,GO:0005886~plasma membrane,	GO:0004180~carboxypeptidase activity,GO:0008237~metallopeptidase activity,GO:0008241~peptidyl-dipeptidase activity,GO:0046872~metal ion binding,
LOC105430696	anionic trypsin(LOC105430696)	Pogonomyrmex barbatus	GO:0006508~proteolysis,	GO:0005615~extracellular space,	GO:0004252~serine-type endopeptidase activity,	pbar04080:Neuroactive ligand-receptor interaction,
LOC105422177	ankyrin repeat and death domain-containing protein 1A-like(LOC105422177)	Pogonomyrmex barbatus	GO:0007165~signal transduction,		GO:0005515~protein binding,
LOC105426181	ankyrin repeat domain-containing protein 29(LOC105426181)	Pogonomyrmex barbatus	GO:0006836~neurotransmitter transport,GO:0016192~vesicle-mediated transport,	GO:0016020~membrane,	GO:0005515~protein binding,	pbar04130:SNARE interactions in vesicular transport,
LOC105432220	ankyrin-2-like(LOC105432220)	Pogonomyrmex barbatus		GO:0005737~cytoplasm,GO:0016020~membrane,	GO:0005515~protein binding,	pbar04624:Toll and Imd signaling pathway,pbar04820:Cytoskeleton in muscle cells,
LOC105428937	apolipoprotein D-like(LOC105428937)	Pogonomyrmex barbatus	GO:0000302~response to reactive oxygen species,GO:0006629~lipid metabolic process,GO:0006869~lipid transport,GO:0007420~brain development,GO:0042246~tissue regeneration,	GO:0005737~cytoplasm,	GO:0008289~lipid binding,
LOC105423458	apyrase-like(LOC105423458)	Pogonomyrmex barbatus	GO:0006196~AMP catabolic process,	GO:0005886~plasma membrane,	GO:0000166~nucleotide binding,GO:0008253~5'-nucleotidase activity,GO:0046872~metal ion binding,
LOC105425104	aquaporin AQPAe.a-like(LOC105425104)	Pogonomyrmex barbatus	GO:0055085~transmembrane transport,	GO:0005886~plasma membrane,	GO:0015250~water channel activity,GO:0015267~channel activity,
LOC105425102	aquaporin AQPcic-like(LOC105425102)	Pogonomyrmex barbatus	GO:0055085~transmembrane transport,	GO:0005886~plasma membrane,	GO:0015250~water channel activity,GO:0015267~channel activity,
LOC105433408	aquaporin homolog protein drip(Drip)	Pogonomyrmex barbatus	GO:0055085~transmembrane transport,	GO:0005886~plasma membrane,	GO:0015250~water channel activity,GO:0015267~channel activity,
LOC105430849	armadillo repeat-containing protein 6 homolog(LOC105430849)	Pogonomyrmex barbatus	GO:0002244~hematopoietic progenitor cell differentiation,		GO:0005515~protein binding,
LOC112552521	aryl hydrocarbon receptor nuclear translocator-like protein 1(LOC112552521)	Pogonomyrmex barbatus	GO:0006357~regulation of transcription by RNA polymerase II,	GO:0005634~nucleus,GO:0034751~aryl hydrocarbon receptor complex,	GO:0000978~RNA polymerase II cis-regulatory region sequence-specific DNA binding,GO:0000981~DNA-binding transcription factor activity, RNA polymerase II-specific,
LOC105434003	arylsulfatase B-like(LOC105434003)	Pogonomyrmex barbatus		GO:0016020~membrane,	GO:0008484~sulfuric ester hydrolase activity,	pbar00531:Glycosaminoglycan degradation,pbar01100:Metabolic pathways,pbar04142:Lysosome,
LOC105422737	arylsulfatase I-like(LOC105422737)	Pogonomyrmex barbatus			GO:0008484~sulfuric ester hydrolase activity,
LOC105433193	atrial natriuretic peptide receptor 1(LOC105433193)	Pogonomyrmex barbatus	GO:0006182~cGMP biosynthetic process,GO:0006468~protein phosphorylation,GO:0007168~receptor guanylyl cyclase signaling pathway,GO:0035556~intracellular signal transduction,	GO:0005886~plasma membrane,GO:0016020~membrane,	GO:0001653~peptide receptor activity,GO:0004016~adenylate cyclase activity,GO:0004383~guanylate cyclase activity,GO:0004672~protein kinase activity,GO:0005524~ATP binding,GO:0005525~GTP binding,	pbar00230:Purine metabolism,pbar01100:Metabolic pathways,pbar04081:Hormone signaling,
LOC105425792	axonemal 84 kDa protein-like(LOC105425792)	Pogonomyrmex barbatus		GO:0005930~axoneme,	GO:0008017~microtubule binding,GO:0048487~beta-tubulin binding,
LOC105423988	axotactin(axo)	Pogonomyrmex barbatus		GO:0016020~membrane,	GO:0004867~serine-type endopeptidase inhibitor activity,
LOC105422253	b(0,+)-type amino acid transporter 1-like(LOC105422253)	Pogonomyrmex barbatus	GO:0003333~amino acid transmembrane transport,	GO:0016020~membrane,	GO:0015179~L-amino acid transmembrane transporter activity,
LOC105424238	bHLH protein deadpan(dpn)	Pogonomyrmex barbatus	GO:0006355~regulation of DNA-templated transcription,GO:0006357~regulation of transcription by RNA polymerase II,GO:0009952~anterior/posterior pattern specification,GO:0010558~negative regulation of macromolecule biosynthetic process,GO:0050767~regulation of neurogenesis,	GO:0005634~nucleus,	GO:0000978~RNA polymerase II cis-regulatory region sequence-specific DNA binding,GO:0000981~DNA-binding transcription factor activity, RNA polymerase II-specific,GO:0003677~DNA binding,GO:0046983~protein dimerization activity,
LOC105426912	bangles and beads(bnb)	Pogonomyrmex barbatus			GO:0016301~kinase activity,
LOC105424865	basement membrane-specific heparan sulfate proteoglycan core protein-like(LOC105424865)	Pogonomyrmex barbatus	GO:0050808~synapse organization,	GO:0032589~neuron projection membrane,
LOC105429978	basic helix-loop-helix transcription factor amos(LOC105429978)	Pogonomyrmex barbatus	GO:0006357~regulation of transcription by RNA polymerase II,GO:0010557~positive regulation of macromolecule biosynthetic process,GO:0032502~developmental process,GO:0045165~cell fate commitment,GO:0072002~Malpighian tubule development,		GO:0000977~RNA polymerase II transcription regulatory region sequence-specific DNA binding,GO:0000981~DNA-binding transcription factor activity, RNA polymerase II-specific,GO:0046982~protein heterodimerization activity,GO:0046983~protein dimerization activity,
LOC105422261	bestrophin 2(Best2)	Pogonomyrmex barbatus		GO:0016020~membrane,	GO:0005254~chloride channel activity,
LOC105431786	beta Hydroxy acid dehydrogenase 1(Had1)	Pogonomyrmex barbatus	GO:0006631~fatty acid metabolic process,		GO:0016616~oxidoreductase activity, acting on the CH-OH group of donors, NAD or NADP as acceptor,GO:0050104~L-gulonate 3-dehydrogenase activity,GO:0070403~NAD+ binding,	pbar00040:Pentose and glucuronate interconversions,pbar01100:Metabolic pathways,
LOC105434326	beta-1,3-galactosyltransferase 5-like(LOC105434326)	Pogonomyrmex barbatus	GO:0006486~protein glycosylation,GO:0006493~protein O-linked glycosylation,	GO:0000139~Golgi membrane,GO:0016020~membrane,	GO:0016758~hexosyltransferase activity,
LOC105429304	beta-1,4-glucuronyltransferase 1-like(LOC105429304)	Pogonomyrmex barbatus				pbar00515:Mannose type O-glycan biosynthesis,pbar01100:Metabolic pathways,
LOC105428492	beta-1,4-mannosyl-glycoprotein 4-beta-N-acetylglucosaminyltransferase(Mgat3)	Pogonomyrmex barbatus	GO:0006044~N-acetylglucosamine metabolic process,GO:0006487~protein N-linked glycosylation,	GO:0016020~membrane,	GO:0003830~beta-1,4-mannosylglycoprotein 4-beta-N-acetylglucosaminyltransferase activity,	pbar00510:N-Glycan biosynthesis,pbar01100:Metabolic pathways,
LOC105424837	beta-galactosidase-like(LOC105424837)	Pogonomyrmex barbatus	GO:0005975~carbohydrate metabolic process,	GO:0005773~vacuole,	GO:0004565~beta-galactosidase activity,	pbar00052:Galactose metabolism,pbar00511:Other glycan degradation,pbar00531:Glycosaminoglycan degradation,pbar00600:Sphingolipid metabolism,pbar00604:Glycosphingolipid biosynthesis - ganglio series,pbar01100:Metabolic pathways,pbar04142:Lysosome,
LOC105422856	blistery(by)	Pogonomyrmex barbatus		GO:0005925~focal adhesion,	GO:0004721~phosphoprotein phosphatase activity,GO:0005515~protein binding,GO:0046872~metal ion binding,
LOC105427121	bone morphogenetic protein 4-like(LOC105427121)	Pogonomyrmex barbatus	GO:0060395~SMAD protein signal transduction,	GO:0005576~extracellular region,GO:0005615~extracellular space,	GO:0005125~cytokine activity,GO:0008083~growth factor activity,
LOC105427456	borderless(bdl)	Pogonomyrmex barbatus	GO:0007156~homophilic cell adhesion via plasma membrane adhesion molecules,GO:0007411~axon guidance,GO:0009653~anatomical structure morphogenesis,GO:0030154~cell differentiation,GO:0048731~system development,GO:0070593~dendrite self-avoidance,GO:0098609~cell-cell adhesion,	GO:0005886~plasma membrane,GO:0016020~membrane,GO:0030424~axon,	GO:0098632~cell-cell adhesion mediator activity,
LOC105430791	breast cancer anti-estrogen resistance protein 3(LOC105430791)	Pogonomyrmex barbatus	GO:0007264~small GTPase-mediated signal transduction,GO:0033138~positive regulation of peptidyl-serine phosphorylation,		GO:0001784~phosphotyrosine residue binding,GO:0005085~guanyl-nucleotide exchange factor activity,
LOC105429835	bruchpilot(brp)	Pogonomyrmex barbatus	GO:0007274~neuromuscular synaptic transmission,GO:0048167~regulation of synaptic plasticity,GO:0048790~maintenance of presynaptic active zone structure,	GO:0042995~cell projection,GO:0048788~cytoskeleton of presynaptic active zone,	GO:0098882~structural constituent of presynaptic active zone,
LOC105429076	bruno 3(bru3)	Pogonomyrmex barbatus	GO:0000381~regulation of alternative mRNA splicing, via spliceosome,GO:0006376~mRNA splice site recognition,	GO:0005634~nucleus,GO:0005737~cytoplasm,GO:1990904~ribonucleoprotein complex,	GO:0003723~RNA binding,GO:0003729~mRNA binding,
LOC105424603	bubblegum(bgm)	Pogonomyrmex barbatus		GO:0005783~endoplasmic reticulum,GO:0016020~membrane,	GO:0004467~long-chain fatty acid-CoA ligase activity,	pbar00061:Fatty acid biosynthesis,pbar00071:Fatty acid degradation,pbar01100:Metabolic pathways,pbar01212:Fatty acid metabolism,
LOC105427484	cGAS-like receptor 1(cGlr1)	Pogonomyrmex barbatus			GO:0005524~ATP binding,GO:0005525~GTP binding,GO:0016779~nucleotidyltransferase activity,GO:0046872~metal ion binding,
LOC105421991	cadherin-74A(Cad74A)	Pogonomyrmex barbatus	GO:0000902~cell morphogenesis,GO:0007043~cell-cell junction assembly,GO:0007156~homophilic cell adhesion via plasma membrane adhesion molecules,GO:0007275~multicellular organism development,GO:0016339~calcium-dependent cell-cell adhesion via plasma membrane cell adhesion molecules,GO:0016477~cell migration,GO:0034332~adherens junction organization,	GO:0005886~plasma membrane,GO:0005912~adherens junction,GO:0016342~catenin complex,	GO:0005509~calcium ion binding,GO:0008013~beta-catenin binding,GO:0045296~cadherin binding,
LOC105429061	cadherin-99C(Cad99C)	Pogonomyrmex barbatus	GO:0002009~morphogenesis of an epithelium,GO:0007156~homophilic cell adhesion via plasma membrane adhesion molecules,GO:0016477~cell migration,	GO:0005886~plasma membrane,GO:0016342~catenin complex,	GO:0005509~calcium ion binding,GO:0008013~beta-catenin binding,GO:0045296~cadherin binding,
LOC105430886	calcium/calmodulin-dependent protein kinase kinase 2(LOC105430886)	Pogonomyrmex barbatus	GO:0006468~protein phosphorylation,GO:0035556~intracellular signal transduction,GO:0045860~positive regulation of protein kinase activity,	GO:0005737~cytoplasm,	GO:0004683~calcium/calmodulin-dependent protein kinase activity,GO:0005516~calmodulin binding,GO:0005524~ATP binding,	pbar04140:Autophagy - animal,
LOC105433315	calmodulin(LOC105433315)	Pogonomyrmex barbatus		GO:0016460~myosin II complex,	GO:0005509~calcium ion binding,GO:0030234~enzyme regulator activity,	pbar04070:Phosphatidylinositol signaling system,pbar04745:Phototransduction - fly,
LOC105431337	calmodulin-lysine N-methyltransferase(LOC105431337)	Pogonomyrmex barbatus	GO:0032259~methylation,	GO:0005634~nucleus,GO:0005737~cytoplasm,	GO:0018025~calmodulin-lysine N-methyltransferase activity,	pbar00310:Lysine degradation,pbar01100:Metabolic pathways,
LOC105427150	carbonic anhydrase 1(CAH1)	Pogonomyrmex barbatus		GO:0005737~cytoplasm,	GO:0004089~carbonate dehydratase activity,GO:0008270~zinc ion binding,	pbar00910:Nitrogen metabolism,pbar01100:Metabolic pathways,
LOC105431455	carboxylesterase 1D(LOC105431455)	Pogonomyrmex barbatus	GO:0007158~neuron cell-cell adhesion,GO:0007268~chemical synaptic transmission,GO:0048488~synaptic vesicle endocytosis,GO:0050804~modulation of chemical synaptic transmission,GO:0097104~postsynaptic membrane assembly,GO:0097105~presynaptic membrane assembly,	GO:0009986~cell surface,GO:0045202~synapse,GO:0045211~postsynaptic membrane,	GO:0038023~signaling receptor activity,GO:0042043~neurexin family protein binding,
LOC105431032	cationic amino acid transporter 2(LOC105431032)	Pogonomyrmex barbatus	GO:0006865~amino acid transport,GO:0055085~transmembrane transport,	GO:0005886~plasma membrane,	GO:0015171~amino acid transmembrane transporter activity,
LOC105430208	cationic amino acid transporter 4(LOC105430208)	Pogonomyrmex barbatus	GO:0006865~amino acid transport,GO:0055085~transmembrane transport,	GO:0005886~plasma membrane,	GO:0015171~amino acid transmembrane transporter activity,
LOC112552727	cell adhesion molecule 2-like(LOC112552727)	Pogonomyrmex barbatus	GO:0050808~synapse organization,	GO:0032589~neuron projection membrane,
LOC105432309	centrosomal protein of 104 kDa(LOC105432309)	Pogonomyrmex barbatus		GO:0005929~cilium,
LOC105433122	chitin deacetylase Cda4(Cda4)	Pogonomyrmex barbatus	GO:0005975~carbohydrate metabolic process,	GO:0005576~extracellular region,	GO:0008061~chitin binding,GO:0016787~hydrolase activity,
LOC105428191	chitinase-3-like protein 2(LOC105428191)	Pogonomyrmex barbatus	GO:0005975~carbohydrate metabolic process,GO:0006032~chitin catabolic process,	GO:0005576~extracellular region,GO:0016020~membrane,	GO:0004568~chitinase activity,GO:0008061~chitin binding,	pbar00520:Amino sugar and nucleotide sugar metabolism,pbar01100:Metabolic pathways,
LOC105428437	cholecystokinin receptor-like(LOC105428437)	Pogonomyrmex barbatus	GO:0007218~neuropeptide signaling pathway,	GO:0005886~plasma membrane,GO:0016020~membrane,	GO:0008188~neuropeptide receptor activity,GO:0015054~gastrin receptor activity,	pbar04080:Neuroactive ligand-receptor interaction,pbar04081:Hormone signaling,
LOC105423159	cholinesterase 1-like(LOC105423159)	Pogonomyrmex barbatus			GO:0052689~carboxylic ester hydrolase activity,
LOC105424487	chymotrypsin-2-like(LOC105424487)	Pogonomyrmex barbatus	GO:0006508~proteolysis,	GO:0005576~extracellular region,	GO:0004252~serine-type endopeptidase activity,
LOC105433195	cilia- and flagella-associated protein 43-like(LOC105433195)	Pogonomyrmex barbatus	GO:0003341~cilium movement,GO:0060271~cilium assembly,	GO:0005930~axoneme,GO:0031514~motile cilium,	GO:0005515~protein binding,
LOC105429092	collagen alpha chain CG42342(LOC105429092)	Pogonomyrmex barbatus	GO:0030198~extracellular matrix organization,	GO:0005581~collagen trimer,GO:0005594~collagen type IX trimer,GO:0005615~extracellular space,GO:0031012~extracellular matrix,GO:0062023~collagen-containing extracellular matrix,	GO:0030020~extracellular matrix structural constituent conferring tensile strength,
LOC105434283	cornichon-like protein(cnir)	Pogonomyrmex barbatus	GO:0006888~endoplasmic reticulum to Golgi vesicle-mediated transport,GO:0015031~protein transport,GO:0016192~vesicle-mediated transport,	GO:0005783~endoplasmic reticulum,GO:0005789~endoplasmic reticulum membrane,GO:0005793~endoplasmic reticulum-Golgi intermediate compartment,GO:0016020~membrane,GO:0030134~COPII-coated ER to Golgi transport vesicle,
LOC105430546	corticotropin releasing hormone binding protein(crh-BP)	Pogonomyrmex barbatus	GO:0009755~hormone-mediated signaling pathway,GO:0051460~negative regulation of corticotropin secretion,GO:1900011~negative regulation of corticotropin-releasing hormone receptor activity,	GO:0005615~extracellular space,	GO:0051424~corticotropin-releasing hormone binding,
LOC105432690	crumbs(crb)	Pogonomyrmex barbatus	GO:0007157~heterophilic cell-cell adhesion via plasma membrane cell adhesion molecules,GO:0009653~anatomical structure morphogenesis,GO:0030154~cell differentiation,GO:0045197~establishment or maintenance of epithelial cell apical/basal polarity,GO:0048513~animal organ development,	GO:0005886~plasma membrane,GO:0016020~membrane,GO:0032991~protein-containing complex,	GO:0005509~calcium ion binding,	pbar04391:Hippo signaling pathway - fly,
LOC105430632	cubilin-like(LOC105430632)	Pogonomyrmex barbatus		GO:0005886~plasma membrane,	GO:0005515~protein binding,
LOC105429736	cuticle protein 67-like(LOC105429736)	Pogonomyrmex barbatus			GO:0042302~structural constituent of cuticle,
LOC105427239	cuticular protein 3(LOC105427239)	Pogonomyrmex barbatus		GO:0005615~extracellular space,GO:0016020~membrane,GO:0031012~extracellular matrix,	GO:0042302~structural constituent of cuticle,
LOC105428327	cuticular protein 6(CPR6)	Pogonomyrmex barbatus		GO:0005615~extracellular space,GO:0031012~extracellular matrix,	GO:0042302~structural constituent of cuticle,
LOC105423297	cytochrome P450 4C1-like(LOC105423297)	Pogonomyrmex barbatus			GO:0004497~monooxygenase activity,GO:0005506~iron ion binding,GO:0016705~oxidoreductase activity, acting on paired donors, with incorporation or reduction of molecular oxygen,GO:0020037~heme binding,
LOC105425380	cytochrome P450 4C1-like(LOC105425380)	Pogonomyrmex barbatus		GO:0005789~endoplasmic reticulum membrane,	GO:0004497~monooxygenase activity,GO:0005506~iron ion binding,GO:0016705~oxidoreductase activity, acting on paired donors, with incorporation or reduction of molecular oxygen,GO:0020037~heme binding,
LOC105427553	cytochrome P450 4C1-like(LOC105427553)	Pogonomyrmex barbatus			GO:0004497~monooxygenase activity,GO:0005506~iron ion binding,GO:0016705~oxidoreductase activity, acting on paired donors, with incorporation or reduction of molecular oxygen,GO:0020037~heme binding,
LOC105430032	cytochrome P450 4C1-like(LOC105430032)	Pogonomyrmex barbatus		GO:0005789~endoplasmic reticulum membrane,	GO:0004497~monooxygenase activity,GO:0005506~iron ion binding,GO:0016705~oxidoreductase activity, acting on paired donors, with incorporation or reduction of molecular oxygen,GO:0020037~heme binding,
LOC105430344	cytochrome P450 4c21-like(LOC105430344)	Pogonomyrmex barbatus		GO:0005789~endoplasmic reticulum membrane,	GO:0004497~monooxygenase activity,GO:0005506~iron ion binding,GO:0016705~oxidoreductase activity, acting on paired donors, with incorporation or reduction of molecular oxygen,GO:0020037~heme binding,
LOC105432253	cytochrome P450 4c21-like(LOC105432253)	Pogonomyrmex barbatus		GO:0005789~endoplasmic reticulum membrane,	GO:0004497~monooxygenase activity,GO:0005506~iron ion binding,GO:0016705~oxidoreductase activity, acting on paired donors, with incorporation or reduction of molecular oxygen,GO:0020037~heme binding,
LOC105427009	cytochrome P450 4c3-like(LOC105427009)	Pogonomyrmex barbatus		GO:0005789~endoplasmic reticulum membrane,	GO:0004497~monooxygenase activity,GO:0005506~iron ion binding,GO:0016705~oxidoreductase activity, acting on paired donors, with incorporation or reduction of molecular oxygen,GO:0020037~heme binding,
LOC105428432	cytochrome P450 4g15-like(LOC105428432)	Pogonomyrmex barbatus		GO:0016020~membrane,	GO:0004497~monooxygenase activity,GO:0005506~iron ion binding,GO:0016705~oxidoreductase activity, acting on paired donors, with incorporation or reduction of molecular oxygen,GO:0020037~heme binding,
LOC105429210	cytochrome P450 6k1-like(LOC105429210)	Pogonomyrmex barbatus		GO:0005789~endoplasmic reticulum membrane,	GO:0004497~monooxygenase activity,GO:0005506~iron ion binding,GO:0016705~oxidoreductase activity, acting on paired donors, with incorporation or reduction of molecular oxygen,GO:0020037~heme binding,
LOC105429277	cytochrome P450 6k1-like(LOC105429277)	Pogonomyrmex barbatus		GO:0005789~endoplasmic reticulum membrane,	GO:0004497~monooxygenase activity,GO:0005506~iron ion binding,GO:0016705~oxidoreductase activity, acting on paired donors, with incorporation or reduction of molecular oxygen,GO:0020037~heme binding,
LOC105433109	cytochrome P450 6k1-like(LOC105433109)	Pogonomyrmex barbatus		GO:0005789~endoplasmic reticulum membrane,	GO:0004497~monooxygenase activity,GO:0005506~iron ion binding,GO:0016705~oxidoreductase activity, acting on paired donors, with incorporation or reduction of molecular oxygen,GO:0020037~heme binding,
LOC112552780	cytochrome P450 6k1-like(LOC112552780)	Pogonomyrmex barbatus		GO:0005789~endoplasmic reticulum membrane,	GO:0004497~monooxygenase activity,GO:0005506~iron ion binding,GO:0016705~oxidoreductase activity, acting on paired donors, with incorporation or reduction of molecular oxygen,GO:0020037~heme binding,
LOC105424962	cytochrome P450 9e2-like(LOC105424962)	Pogonomyrmex barbatus		GO:0005789~endoplasmic reticulum membrane,	GO:0004497~monooxygenase activity,GO:0005506~iron ion binding,GO:0016705~oxidoreductase activity, acting on paired donors, with incorporation or reduction of molecular oxygen,GO:0020037~heme binding,
LOC105424963	cytochrome P450 9e2-like(LOC105424963)	Pogonomyrmex barbatus		GO:0005789~endoplasmic reticulum membrane,	GO:0004497~monooxygenase activity,GO:0005506~iron ion binding,GO:0016705~oxidoreductase activity, acting on paired donors, with incorporation or reduction of molecular oxygen,GO:0020037~heme binding,
LOC105424965	cytochrome P450 9e2-like(LOC105424965)	Pogonomyrmex barbatus		GO:0005789~endoplasmic reticulum membrane,	GO:0004497~monooxygenase activity,GO:0005506~iron ion binding,GO:0016705~oxidoreductase activity, acting on paired donors, with incorporation or reduction of molecular oxygen,GO:0020037~heme binding,
LOC105428222	cytochrome P450 9e2-like(LOC105428222)	Pogonomyrmex barbatus		GO:0005789~endoplasmic reticulum membrane,	GO:0004497~monooxygenase activity,GO:0005506~iron ion binding,GO:0016705~oxidoreductase activity, acting on paired donors, with incorporation or reduction of molecular oxygen,GO:0020037~heme binding,
LOC105429689	cytochrome P450 9e2-like(LOC105429689)	Pogonomyrmex barbatus		GO:0005789~endoplasmic reticulum membrane,	GO:0004497~monooxygenase activity,GO:0005506~iron ion binding,GO:0016705~oxidoreductase activity, acting on paired donors, with incorporation or reduction of molecular oxygen,GO:0020037~heme binding,
LOC105433950	cytochrome P450 9e2-like(LOC105433950)	Pogonomyrmex barbatus		GO:0005789~endoplasmic reticulum membrane,	GO:0004497~monooxygenase activity,GO:0005506~iron ion binding,GO:0016705~oxidoreductase activity, acting on paired donors, with incorporation or reduction of molecular oxygen,GO:0020037~heme binding,
LOC105433952	cytochrome P450 9e2-like(LOC105433952)	Pogonomyrmex barbatus		GO:0005789~endoplasmic reticulum membrane,	GO:0004497~monooxygenase activity,GO:0005506~iron ion binding,GO:0016705~oxidoreductase activity, acting on paired donors, with incorporation or reduction of molecular oxygen,GO:0020037~heme binding,
LOC105430756	cytochrome b5(LOC105430756)	Pogonomyrmex barbatus		GO:0016020~membrane,GO:0043231~intracellular membrane-bounded organelle,	GO:0020037~heme binding,GO:0046872~metal ion binding,
LOC105434286	dachshund(dac)	Pogonomyrmex barbatus		GO:0005634~nucleus,GO:0005667~transcription regulator complex,	GO:0000978~RNA polymerase II cis-regulatory region sequence-specific DNA binding,GO:0000981~DNA-binding transcription factor activity, RNA polymerase II-specific,
LOC105432986	decima(dcma)	Pogonomyrmex barbatus	GO:0007186~G protein-coupled receptor signaling pathway,GO:0009968~negative regulation of signal transduction,	GO:0016020~membrane,GO:0043005~neuron projection,
LOC105430661	defective proboscis extension response 1(dpr1)	Pogonomyrmex barbatus	GO:0050808~synapse organization,	GO:0032589~neuron projection membrane,
LOC105427809	defective proboscis extension response 12(dpr12)	Pogonomyrmex barbatus	GO:0050808~synapse organization,	GO:0032589~neuron projection membrane,
LOC105432611	defective proboscis extension response 8(dpr8)	Pogonomyrmex barbatus	GO:0050808~synapse organization,	GO:0032589~neuron projection membrane,
LOC105426743	deoxyribonuclease II(DNaseII)	Pogonomyrmex barbatus	GO:0006309~apoptotic DNA fragmentation,		GO:0004531~deoxyribonuclease II activity,	pbar04142:Lysosome,
LOC105428141	diacylglycerol kinase eta(LOC105428141)	Pogonomyrmex barbatus	GO:0007200~phospholipase C-activating G protein-coupled receptor signaling pathway,GO:0035556~intracellular signal transduction,GO:0046339~diacylglycerol metabolic process,GO:0046486~glycerolipid metabolic process,GO:0046834~lipid phosphorylation,	GO:0005737~cytoplasm,GO:0005886~plasma membrane,	GO:0004143~ATP-dependent diacylglycerol kinase activity,GO:0005515~protein binding,GO:0005524~ATP binding,GO:0046872~metal ion binding,	pbar00561:Glycerolipid metabolism,pbar00564:Glycerophospholipid metabolism,pbar01100:Metabolic pathways,pbar04070:Phosphatidylinositol signaling system,
LOC105434192	diacylglycerol kinase theta(LOC105434192)	Pogonomyrmex barbatus	GO:0007200~phospholipase C-activating G protein-coupled receptor signaling pathway,GO:0035556~intracellular signal transduction,GO:0046339~diacylglycerol metabolic process,GO:0046834~lipid phosphorylation,	GO:0016020~membrane,	GO:0003723~RNA binding,GO:0004143~ATP-dependent diacylglycerol kinase activity,GO:0005524~ATP binding,GO:0046872~metal ion binding,	pbar00561:Glycerolipid metabolism,pbar00564:Glycerophospholipid metabolism,pbar01100:Metabolic pathways,pbar04070:Phosphatidylinositol signaling system,
LOC105433318	dipeptidase 1(LOC105433318)	Pogonomyrmex barbatus	GO:0006508~proteolysis,	GO:0098552~side of membrane,	GO:0046872~metal ion binding,GO:0070573~metallodipeptidase activity,
LOC105432585	dipeptidase 1-like(LOC105432585)	Pogonomyrmex barbatus	GO:0006508~proteolysis,	GO:0098552~side of membrane,	GO:0046872~metal ion binding,GO:0070573~metallodipeptidase activity,
LOC105430267	discoidin domain-containing receptor 2-like(LOC105430267)	Pogonomyrmex barbatus		GO:0005886~plasma membrane,
LOC105430269	discoidin domain-containing receptor 2-like(LOC105430269)	Pogonomyrmex barbatus	GO:0006468~protein phosphorylation,GO:0007169~cell surface receptor protein tyrosine kinase signaling pathway,GO:0007275~multicellular organism development,GO:0010976~positive regulation of neuron projection development,GO:0033674~positive regulation of kinase activity,GO:0051897~positive regulation of phosphatidylinositol 3-kinase/protein kinase B signal transduction,	GO:0005886~plasma membrane,GO:0043235~receptor complex,	GO:0005518~collagen binding,GO:0005524~ATP binding,GO:0038062~protein tyrosine kinase collagen receptor activity,
LOC105429107	diuretic hormone 44(Dh44)	Pogonomyrmex barbatus		GO:0005576~extracellular region,	GO:0005179~hormone activity,
LOC105425834	diuretic hormone class 2(Dh31)	Pogonomyrmex barbatus	GO:0007589~body fluid secretion,	GO:0005615~extracellular space,	GO:0001664~G protein-coupled receptor binding,GO:0008613~diuretic hormone activity,
LOC105430596	dolichyldiphosphatase 1-like(LOC105430596)	Pogonomyrmex barbatus	GO:0006486~protein glycosylation,GO:0008610~lipid biosynthetic process,	GO:0016020~membrane,	GO:0042392~sphingosine-1-phosphate phosphatase activity,GO:0047874~dolichyldiphosphatase activity,	pbar00510:N-Glycan biosynthesis,pbar01100:Metabolic pathways,
LOC105423055	dopamine N-acetyltransferase-like(LOC105423055)	Pogonomyrmex barbatus			GO:0008080~N-acetyltransferase activity,
LOC105432456	dopamine receptor, D1(Dop1)	Pogonomyrmex barbatus	GO:0043410~positive regulation of MAPK cascade,GO:0071880~adenylate cyclase-activating adrenergic receptor signaling pathway,	GO:0005886~plasma membrane,GO:0016020~membrane,	GO:0004930~G protein-coupled receptor activity,GO:0004989~octopamine receptor activity,	pbar04080:Neuroactive ligand-receptor interaction,pbar04081:Hormone signaling,
LOC105428944	dusky-like(dyl)	Pogonomyrmex barbatus		GO:0016020~membrane,
LOC105429726	dynein heavy chain 7, axonemal-like(LOC105429726)	Pogonomyrmex barbatus	GO:0007018~microtubule-based movement,	GO:0005874~microtubule,GO:0005930~axoneme,GO:0030286~dynein complex,	GO:0005524~ATP binding,GO:0008569~minus-end-directed microtubule motor activity,GO:0016887~ATP hydrolysis activity,GO:0045505~dynein intermediate chain binding,GO:0051959~dynein light intermediate chain binding,	pbar04814:Motor proteins,
LOC105421973	dynein light chain 1, axonemal-like(LOC105421973)	Pogonomyrmex barbatus	GO:0036158~outer dynein arm assembly,	GO:0005737~cytoplasm,	GO:0019901~protein kinase binding,GO:0043014~alpha-tubulin binding,GO:0045504~dynein heavy chain binding,	pbar04814:Motor proteins,
LOC105422242	echinoid(ed)	Pogonomyrmex barbatus	GO:0009653~anatomical structure morphogenesis,GO:0030154~cell differentiation,GO:0098609~cell-cell adhesion,	GO:0005886~plasma membrane,GO:0005911~cell-cell junction,	GO:0050839~cell adhesion molecule binding,	pbar04391:Hippo signaling pathway - fly,
LOC105422514	electron transfer flavoprotein beta subunit lysine methyltransferase-like(LOC105422514)	Pogonomyrmex barbatus	GO:0018023~peptidyl-lysine trimethylation,GO:0032259~methylation,	GO:0005759~mitochondrial matrix,	GO:0016279~protein-lysine N-methyltransferase activity,
LOC105425277	elongation of very long chain fatty acids protein 1-like(LOC105425277)	Pogonomyrmex barbatus	GO:0006633~fatty acid biosynthetic process,GO:0019367~fatty acid elongation, saturated fatty acid,GO:0030148~sphingolipid biosynthetic process,GO:0034625~fatty acid elongation, monounsaturated fatty acid,GO:0034626~fatty acid elongation, polyunsaturated fatty acid,GO:0042761~very long-chain fatty acid biosynthetic process,	GO:0005789~endoplasmic reticulum membrane,GO:0016020~membrane,	GO:0009922~fatty acid elongase activity,
LOC105431148	elongation of very long chain fatty acids protein 1-like(LOC105431148)	Pogonomyrmex barbatus	GO:0019367~fatty acid elongation, saturated fatty acid,GO:0030148~sphingolipid biosynthetic process,GO:0034625~fatty acid elongation, monounsaturated fatty acid,GO:0034626~fatty acid elongation, polyunsaturated fatty acid,GO:0042761~very long-chain fatty acid biosynthetic process,	GO:0005789~endoplasmic reticulum membrane,	GO:0009922~fatty acid elongase activity,	pbar00062:Fatty acid elongation,pbar01040:Biosynthesis of unsaturated fatty acids,pbar01100:Metabolic pathways,pbar01212:Fatty acid metabolism,
LOC105425279	elongation of very long chain fatty acids protein AAEL008004-like(LOC105425279)	Pogonomyrmex barbatus	GO:0019367~fatty acid elongation, saturated fatty acid,GO:0030148~sphingolipid biosynthetic process,GO:0034625~fatty acid elongation, monounsaturated fatty acid,GO:0034626~fatty acid elongation, polyunsaturated fatty acid,GO:0042761~very long-chain fatty acid biosynthetic process,	GO:0005789~endoplasmic reticulum membrane,	GO:0009922~fatty acid elongase activity,
LOC105431156	elongation of very long chain fatty acids protein AAEL008004-like(LOC105431156)	Pogonomyrmex barbatus	GO:0019367~fatty acid elongation, saturated fatty acid,GO:0030148~sphingolipid biosynthetic process,GO:0034625~fatty acid elongation, monounsaturated fatty acid,GO:0034626~fatty acid elongation, polyunsaturated fatty acid,GO:0042761~very long-chain fatty acid biosynthetic process,	GO:0005789~endoplasmic reticulum membrane,	GO:0009922~fatty acid elongase activity,	pbar00062:Fatty acid elongation,pbar01040:Biosynthesis of unsaturated fatty acids,pbar01100:Metabolic pathways,pbar01212:Fatty acid metabolism,
LOC105423425	endocuticle structural glycoprotein SgAbd-8-like(LOC105423425)	Pogonomyrmex barbatus		GO:0062129~chitin-based extracellular matrix,	GO:0008010~structural constituent of chitin-based larval cuticle,
LOC105432498	endoplasmic reticulum aminopeptidase 1-like(LOC105432498)	Pogonomyrmex barbatus	GO:0006508~proteolysis,GO:0043171~peptide catabolic process,	GO:0005615~extracellular space,GO:0005737~cytoplasm,GO:0005886~plasma membrane,GO:0098552~side of membrane,	GO:0008270~zinc ion binding,GO:0042277~peptide binding,GO:0070006~metalloaminopeptidase activity,
LOC105425674	endoplasmic reticulum oxidoreductin-1-like protein(Ero1L)	Pogonomyrmex barbatus	GO:0034975~protein folding in endoplasmic reticulum,	GO:0005783~endoplasmic reticulum,GO:0005789~endoplasmic reticulum membrane,	GO:0015035~protein-disulfide reductase activity,GO:0016972~thiol oxidase activity,GO:0071949~FAD binding,	pbar04141:Protein processing in endoplasmic reticulum,
LOC105425119	endothelial transcription factor GATA-2-like(LOC105425119)	Pogonomyrmex barbatus	GO:0000122~negative regulation of transcription by RNA polymerase II,GO:0045165~cell fate commitment,GO:0045944~positive regulation of transcription by RNA polymerase II,	GO:0005634~nucleus,	GO:0000978~RNA polymerase II cis-regulatory region sequence-specific DNA binding,GO:0000981~DNA-binding transcription factor activity, RNA polymerase II-specific,GO:0008270~zinc ion binding,
LOC105424484	endothelin-converting enzyme homolog(LOC105424484)	Pogonomyrmex barbatus	GO:0016485~protein processing,	GO:0005886~plasma membrane,	GO:0004222~metalloendopeptidase activity,GO:0046872~metal ion binding,
LOC105434241	enhancer of split mbeta protein-like(LOC105434241)	Pogonomyrmex barbatus	GO:0006355~regulation of DNA-templated transcription,GO:0006357~regulation of transcription by RNA polymerase II,GO:0007399~nervous system development,GO:0009952~anterior/posterior pattern specification,GO:0030154~cell differentiation,GO:0050767~regulation of neurogenesis,	GO:0005634~nucleus,	GO:0000978~RNA polymerase II cis-regulatory region sequence-specific DNA binding,GO:0000981~DNA-binding transcription factor activity, RNA polymerase II-specific,GO:0043565~sequence-specific DNA binding,GO:0046983~protein dimerization activity,
LOC105434237	enhancer of split mgamma protein-like(LOC105434237)	Pogonomyrmex barbatus	GO:0006355~regulation of DNA-templated transcription,GO:0006357~regulation of transcription by RNA polymerase II,GO:0007399~nervous system development,GO:0009952~anterior/posterior pattern specification,GO:0030154~cell differentiation,GO:0050767~regulation of neurogenesis,	GO:0005634~nucleus,	GO:0000978~RNA polymerase II cis-regulatory region sequence-specific DNA binding,GO:0000981~DNA-binding transcription factor activity, RNA polymerase II-specific,GO:0043565~sequence-specific DNA binding,GO:0046983~protein dimerization activity,
LOC105434242	enhancer of split mgamma protein-like(LOC105434242)	Pogonomyrmex barbatus	GO:0006355~regulation of DNA-templated transcription,GO:0006357~regulation of transcription by RNA polymerase II,GO:0007399~nervous system development,GO:0009952~anterior/posterior pattern specification,GO:0030154~cell differentiation,GO:0050767~regulation of neurogenesis,	GO:0005634~nucleus,	GO:0000978~RNA polymerase II cis-regulatory region sequence-specific DNA binding,GO:0000981~DNA-binding transcription factor activity, RNA polymerase II-specific,GO:0043565~sequence-specific DNA binding,GO:0046983~protein dimerization activity,
LOC105433881	ephrin(Ephrin)	Pogonomyrmex barbatus	GO:0007411~axon guidance,GO:0048013~ephrin receptor signaling pathway,	GO:0005886~plasma membrane,	GO:0046875~ephrin receptor binding,
LOC105430302	epithelial discoidin domain-containing receptor 1-like(LOC105430302)	Pogonomyrmex barbatus	GO:0006468~protein phosphorylation,GO:0007169~cell surface receptor protein tyrosine kinase signaling pathway,GO:0007275~multicellular organism development,GO:0010976~positive regulation of neuron projection development,GO:0033674~positive regulation of kinase activity,GO:0051897~positive regulation of phosphatidylinositol 3-kinase/protein kinase B signal transduction,	GO:0005886~plasma membrane,GO:0043235~receptor complex,	GO:0005518~collagen binding,GO:0005524~ATP binding,GO:0038062~protein tyrosine kinase collagen receptor activity,
LOC105428552	epoxide hydrolase 4-like(LOC105428552)	Pogonomyrmex barbatus			GO:0004301~epoxide hydrolase activity,GO:0016787~hydrolase activity,
LOC105425909	esterase FE4-like(LOC105425909)	Pogonomyrmex barbatus		GO:0016020~membrane,
LOC105432390	esterase FE4-like(LOC105432390)	Pogonomyrmex barbatus		GO:0016020~membrane,		pbar00564:Glycerophospholipid metabolism,
LOC105428178	excitatory amino acid transporter 1-like(LOC105428178)	Pogonomyrmex barbatus	GO:0015813~L-glutamate transmembrane transport,	GO:0005886~plasma membrane,	GO:0005313~L-glutamate transmembrane transporter activity,GO:0015175~neutral L-amino acid transmembrane transporter activity,GO:0015501~glutamate:sodium symporter activity,
LOC105432124	eye pigment precursor family transporter white(w)	Pogonomyrmex barbatus	GO:0055085~transmembrane transport,	GO:0005886~plasma membrane,GO:0030659~cytoplasmic vesicle membrane,	GO:0005524~ATP binding,GO:0016887~ATP hydrolysis activity,GO:0031409~pigment binding,GO:0140359~ABC-type transporter activity,
LOC105425098	facilitated trehalose transporter Tret1(LOC105425098)	Pogonomyrmex barbatus	GO:0055085~transmembrane transport,	GO:0016020~membrane,	GO:0022857~transmembrane transporter activity,
LOC105429086	facilitated trehalose transporter Tret1-2 homolog(LOC105429086)	Pogonomyrmex barbatus	GO:0055085~transmembrane transport,	GO:0016020~membrane,	GO:0022857~transmembrane transporter activity,
LOC105431338	facilitated trehalose transporter Tret1-like(LOC105431338)	Pogonomyrmex barbatus	GO:0055085~transmembrane transport,	GO:0016020~membrane,	GO:0022857~transmembrane transporter activity,
LOC105432527	facilitated trehalose transporter Tret1-like(LOC105432527)	Pogonomyrmex barbatus	GO:0008643~carbohydrate transport,GO:0055085~transmembrane transport,	GO:0005886~plasma membrane,GO:0016020~membrane,	GO:0051119~sugar transmembrane transporter activity,
LOC105431821	failed axon connections(fax)	Pogonomyrmex barbatus		GO:0005737~cytoplasm,
LOC105422266	farnesol dehydrogenase-like(LOC105422266)	Pogonomyrmex barbatus			GO:0016491~oxidoreductase activity,
LOC105433187	farnesol dehydrogenase-like(LOC105433187)	Pogonomyrmex barbatus			GO:0016491~oxidoreductase activity,
LOC105431276	farnesyl pyrophosphate synthase 1-like(LOC105431276)	Pogonomyrmex barbatus	GO:0042811~pheromone biosynthetic process,GO:0045337~farnesyl diphosphate biosynthetic process,	GO:0005737~cytoplasm,	GO:0004161~dimethylallyltranstransferase activity,GO:0004337~(2E,6E)-farnesyl diphosphate synthase activity,	pbar00900:Terpenoid backbone biosynthesis,pbar01100:Metabolic pathways,
LOC105430933	farnesyl pyrophosphate synthase-like(LOC105430933)	Pogonomyrmex barbatus	GO:0042811~pheromone biosynthetic process,GO:0045337~farnesyl diphosphate biosynthetic process,	GO:0005737~cytoplasm,	GO:0004161~dimethylallyltranstransferase activity,GO:0004337~(2E,6E)-farnesyl diphosphate synthase activity,	pbar00900:Terpenoid backbone biosynthesis,pbar01100:Metabolic pathways,
LOC105430934	farnesyl pyrophosphate synthase-like(LOC105430934)	Pogonomyrmex barbatus	GO:0042811~pheromone biosynthetic process,GO:0045337~farnesyl diphosphate biosynthetic process,	GO:0005737~cytoplasm,	GO:0004161~dimethylallyltranstransferase activity,GO:0004337~(2E,6E)-farnesyl diphosphate synthase activity,	pbar00900:Terpenoid backbone biosynthesis,pbar01100:Metabolic pathways,
LOC105431195	farnesyl pyrophosphate synthase-like(LOC105431195)	Pogonomyrmex barbatus	GO:0042811~pheromone biosynthetic process,GO:0045337~farnesyl diphosphate biosynthetic process,	GO:0005737~cytoplasm,	GO:0004161~dimethylallyltranstransferase activity,GO:0004337~(2E,6E)-farnesyl diphosphate synthase activity,	pbar00900:Terpenoid backbone biosynthesis,pbar01100:Metabolic pathways,
LOC105431899	fascin domain-containing protein singed(singed)	Pogonomyrmex barbatus	GO:0007163~establishment or maintenance of cell polarity,GO:0016477~cell migration,GO:0051017~actin filament bundle assembly,	GO:0005737~cytoplasm,GO:0015629~actin cytoskeleton,	GO:0030674~protein-macromolecule adaptor activity,GO:0051015~actin filament binding,
LOC105433308	fatty acid binding protein(fabp)	Pogonomyrmex barbatus	GO:0015908~fatty acid transport,	GO:0005634~nucleus,GO:0005829~cytosol,	GO:0005504~fatty acid binding,GO:0008289~lipid binding,
LOC105422148	fatty acid synthase-like(LOC105422148)	Pogonomyrmex barbatus	GO:0009058~biosynthetic process,		GO:0016297~fatty acyl-[ACP] hydrolase activity,
LOC105422552	fatty acid synthase-like(LOC105422552)	Pogonomyrmex barbatus	GO:0006633~fatty acid biosynthetic process,		GO:0004312~fatty acid synthase activity,GO:0004315~3-oxoacyl-[acyl-carrier-protein] synthase activity,
LOC105422792	fatty acid synthase-like(LOC105422792)	Pogonomyrmex barbatus	GO:0006633~fatty acid biosynthetic process,		GO:0004312~fatty acid synthase activity,GO:0004315~3-oxoacyl-[acyl-carrier-protein] synthase activity,
LOC105423443	fatty acid synthase-like(LOC105423443)	Pogonomyrmex barbatus	GO:0006633~fatty acid biosynthetic process,		GO:0004312~fatty acid synthase activity,GO:0016491~oxidoreductase activity,
LOC105423682	fatty acid synthase-like(LOC105423682)	Pogonomyrmex barbatus	GO:0006633~fatty acid biosynthetic process,		GO:0004312~fatty acid synthase activity,
LOC105425801	fatty acid synthase-like(LOC105425801)	Pogonomyrmex barbatus	GO:0006633~fatty acid biosynthetic process,		GO:0004312~fatty acid synthase activity,GO:0004315~3-oxoacyl-[acyl-carrier-protein] synthase activity,
LOC105429340	fatty acid synthase-like(LOC105429340)	Pogonomyrmex barbatus	GO:0006633~fatty acid biosynthetic process,		GO:0004312~fatty acid synthase activity,GO:0004315~3-oxoacyl-[acyl-carrier-protein] synthase activity,GO:0016491~oxidoreductase activity,
LOC105425825	fatty acyl-CoA reductase 1(LOC105425825)	Pogonomyrmex barbatus	GO:0035336~long-chain fatty-acyl-CoA metabolic process,	GO:0005777~peroxisome,GO:0016020~membrane,	GO:0080019~alcohol-forming very long-chain fatty acyl-CoA reductase activity,GO:0102965~alcohol-forming long-chain fatty acyl-CoA reductase activity,	pbar04146:Peroxisome,
LOC105425809	fatty acyl-CoA reductase 1-like(LOC105425809)	Pogonomyrmex barbatus	GO:0035336~long-chain fatty-acyl-CoA metabolic process,	GO:0005777~peroxisome,	GO:0080019~alcohol-forming very long-chain fatty acyl-CoA reductase activity,GO:0102965~alcohol-forming long-chain fatty acyl-CoA reductase activity,	pbar04146:Peroxisome,
LOC105434203	fatty acyl-CoA reductase 1-like(LOC105434203)	Pogonomyrmex barbatus	GO:0035336~long-chain fatty-acyl-CoA metabolic process,	GO:0005777~peroxisome,GO:0016020~membrane,	GO:0080019~alcohol-forming very long-chain fatty acyl-CoA reductase activity,GO:0102965~alcohol-forming long-chain fatty acyl-CoA reductase activity,	pbar04146:Peroxisome,
LOC112553041	fatty acyl-CoA reductase 1-like(LOC112553041)	Pogonomyrmex barbatus	GO:0035336~long-chain fatty-acyl-CoA metabolic process,	GO:0005777~peroxisome,	GO:0080019~alcohol-forming very long-chain fatty acyl-CoA reductase activity,
LOC105425816	fatty acyl-CoA reductase wat-like(LOC105425816)	Pogonomyrmex barbatus	GO:0035336~long-chain fatty-acyl-CoA metabolic process,	GO:0005777~peroxisome,GO:0016020~membrane,	GO:0080019~alcohol-forming very long-chain fatty acyl-CoA reductase activity,GO:0102965~alcohol-forming long-chain fatty acyl-CoA reductase activity,
LOC105427816	fatty acyl-CoA reductase wat-like(LOC105427816)	Pogonomyrmex barbatus	GO:0035336~long-chain fatty-acyl-CoA metabolic process,	GO:0005777~peroxisome,GO:0016020~membrane,	GO:0080019~alcohol-forming very long-chain fatty acyl-CoA reductase activity,GO:0102965~alcohol-forming long-chain fatty acyl-CoA reductase activity,	pbar04146:Peroxisome,
LOC105422843	fez family zinc finger protein 1(LOC105422843)	Pogonomyrmex barbatus	GO:0006357~regulation of transcription by RNA polymerase II,GO:0010468~regulation of gene expression,	GO:0005634~nucleus,	GO:0000978~RNA polymerase II cis-regulatory region sequence-specific DNA binding,GO:0003700~DNA-binding transcription factor activity,
LOC105423795	fez family zinc finger protein erm-like(LOC105423795)	Pogonomyrmex barbatus	GO:0006357~regulation of transcription by RNA polymerase II,GO:0009887~animal organ morphogenesis,	GO:0005634~nucleus,	GO:0000978~RNA polymerase II cis-regulatory region sequence-specific DNA binding,GO:0000981~DNA-binding transcription factor activity, RNA polymerase II-specific,GO:0003700~DNA-binding transcription factor activity,GO:0046872~metal ion binding,
LOC105429339	fibrillin-2(LOC105429339)	Pogonomyrmex barbatus		GO:0005576~extracellular region,	GO:0005509~calcium ion binding,	pbar04820:Cytoskeleton in muscle cells,
LOC105426802	filzig(flz)	Pogonomyrmex barbatus	GO:0006508~proteolysis,		GO:0004252~serine-type endopeptidase activity,
LOC105432734	fire dancer(fid)	Pogonomyrmex barbatus	GO:0002098~tRNA wobble uridine modification,GO:0030488~tRNA methylation,	GO:0005634~nucleus,GO:0005737~cytoplasm,	GO:0000049~tRNA binding,GO:0008757~S-adenosylmethionine-dependent methyltransferase activity,GO:0106335~tRNA (5-carboxymethyluridine(34)-5-O)-methyltransferase activity,
LOC105432954	flocculation protein FLO11(LOC105432954)	Pogonomyrmex barbatus		GO:0016020~membrane,
LOC105428636	folliculin-interacting protein 2(LOC105428636)	Pogonomyrmex barbatus		GO:0005737~cytoplasm,GO:0005765~lysosomal membrane,	GO:0042030~ATPase inhibitor activity,GO:0051087~protein-folding chaperone binding,	pbar04150:mTOR signaling pathway,
LOC105426134	follistatin-A(LOC105426134)	Pogonomyrmex barbatus	GO:0048856~anatomical structure development,	GO:0005615~extracellular space,	GO:0005509~calcium ion binding,GO:0005515~protein binding,GO:0005518~collagen binding,GO:0050840~extracellular matrix binding,	pbar04350:TGF-beta signaling pathway,
LOC105422610	follistatin-like 5(Fstl5)	Pogonomyrmex barbatus	GO:0007156~homophilic cell adhesion via plasma membrane adhesion molecules,GO:0007275~multicellular organism development,GO:0030154~cell differentiation,GO:0030510~regulation of BMP signaling pathway,	GO:0005615~extracellular space,GO:0005737~cytoplasm,GO:0005886~plasma membrane,	GO:0005509~calcium ion binding,GO:0005515~protein binding,
LOC105426892	frequenin-1(LOC105426892)	Pogonomyrmex barbatus			GO:0005509~calcium ion binding,GO:0008048~calcium sensitive guanylate cyclase activator activity,
LOC105431936	galactoside 2-alpha-L-fucosyltransferase 2-like(LOC105431936)	Pogonomyrmex barbatus	GO:0005975~carbohydrate metabolic process,GO:0006486~protein glycosylation,GO:0036065~fucosylation,	GO:0016020~membrane,GO:0032580~Golgi cisterna membrane,	GO:0008107~galactoside 2-alpha-L-fucosyltransferase activity,	pbar00601:Glycosphingolipid biosynthesis - lacto and neolacto series,pbar00603:Glycosphingolipid biosynthesis - globo and isoglobo series,pbar01100:Metabolic pathways,
LOC105425566	galanin receptor type 3-like(LOC105425566)	Pogonomyrmex barbatus	GO:0007186~G protein-coupled receptor signaling pathway,	GO:0005886~plasma membrane,GO:0016020~membrane,	GO:0004930~G protein-coupled receptor activity,
LOC105425512	gamma-aminobutyric acid type B receptor subunit 1(GABA-B-R1)	Pogonomyrmex barbatus	GO:0007186~G protein-coupled receptor signaling pathway,GO:0007214~gamma-aminobutyric acid signaling pathway,	GO:0016020~membrane,GO:0038039~G protein-coupled receptor heterodimeric complex,	GO:0004965~G protein-coupled GABA receptor activity,	pbar04080:Neuroactive ligand-receptor interaction,
LOC105430872	gamma-aminobutyric acid type B receptor subunit 2(GABA-B-R2)	Pogonomyrmex barbatus	GO:0007186~G protein-coupled receptor signaling pathway,GO:0007214~gamma-aminobutyric acid signaling pathway,	GO:0016020~membrane,GO:0038039~G protein-coupled receptor heterodimeric complex,	GO:0004965~G protein-coupled GABA receptor activity,	pbar04080:Neuroactive ligand-receptor interaction,
LOC105427462	gamma-aminobutyric acid type B receptor subunit 3(GABA-B-R3)	Pogonomyrmex barbatus	GO:0007186~G protein-coupled receptor signaling pathway,GO:0007214~gamma-aminobutyric acid signaling pathway,	GO:0016020~membrane,GO:0038039~G protein-coupled receptor heterodimeric complex,	GO:0004965~G protein-coupled GABA receptor activity,	pbar04080:Neuroactive ligand-receptor interaction,
LOC105421986	gamma-glutamyl carboxylase(GC)	Pogonomyrmex barbatus	GO:0017187~peptidyl-glutamic acid carboxylation,	GO:0012505~endomembrane system,GO:0016020~membrane,	GO:0008488~gamma-glutamyl carboxylase activity,GO:0019842~vitamin binding,	pbar00130:Ubiquinone and other terpenoid-quinone biosynthesis,pbar01100:Metabolic pathways,pbar01240:Biosynthesis of cofactors,
LOC105422720	globin 1(Glob1)	Pogonomyrmex barbatus	GO:0015671~oxygen transport,	GO:0016528~sarcoplasm,	GO:0005344~oxygen carrier activity,GO:0016491~oxidoreductase activity,GO:0019825~oxygen binding,GO:0020037~heme binding,
LOC105424264	glucose dehydrogenase [FAD, quinone](LOC105424264)	Pogonomyrmex barbatus			GO:0016614~oxidoreductase activity, acting on CH-OH group of donors,GO:0050660~flavin adenine dinucleotide binding,	pbar00030:Pentose phosphate pathway,pbar01100:Metabolic pathways,
LOC105432040	glucose dehydrogenase [FAD, quinone]-like(LOC105432040)	Pogonomyrmex barbatus			GO:0016614~oxidoreductase activity, acting on CH-OH group of donors,GO:0050660~flavin adenine dinucleotide binding,	pbar00030:Pentose phosphate pathway,pbar01100:Metabolic pathways,
LOC105432041	glucose dehydrogenase [FAD, quinone]-like(LOC105432041)	Pogonomyrmex barbatus			GO:0016614~oxidoreductase activity, acting on CH-OH group of donors,GO:0050660~flavin adenine dinucleotide binding,	pbar00030:Pentose phosphate pathway,pbar01100:Metabolic pathways,
LOC105434307	glucose dehydrogenase [FAD, quinone]-like(LOC105434307)	Pogonomyrmex barbatus			GO:0016614~oxidoreductase activity, acting on CH-OH group of donors,GO:0047875~ecdysone oxidase activity,GO:0050660~flavin adenine dinucleotide binding,
LOC105432612	glucosylceramidase-like(LOC105432612)	Pogonomyrmex barbatus	GO:0006680~glucosylceramide catabolic process,	GO:0016020~membrane,	GO:0004348~glucosylceramidase activity,	pbar00511:Other glycan degradation,pbar00600:Sphingolipid metabolism,pbar01100:Metabolic pathways,pbar04142:Lysosome,
LOC105426444	glutamate decarboxylase-like protein black(black)	Pogonomyrmex barbatus	GO:0019752~carboxylic acid metabolic process,	GO:0005737~cytoplasm,	GO:0016831~carboxy-lyase activity,GO:0030170~pyridoxal phosphate binding,	pbar00410:beta-Alanine metabolism,pbar00430:Taurine and hypotaurine metabolism,pbar00770:Pantothenate and CoA biosynthesis,pbar01100:Metabolic pathways,
LOC105430977	glutamate dehydrogenase, mitochondrial(Gdh)	Pogonomyrmex barbatus	GO:0006538~glutamate catabolic process,	GO:0005739~mitochondrion,	GO:0004352~glutamate dehydrogenase (NAD+) activity,	pbar00220:Arginine biosynthesis,pbar00250:Alanine, aspartate and glutamate metabolism,pbar00910:Nitrogen metabolism,pbar01100:Metabolic pathways,pbar01200:Carbon metabolism,
LOC105433768	glutamate-gated chloride channel-like(LOC105433768)	Pogonomyrmex barbatus	GO:0007165~signal transduction,GO:0007268~chemical synaptic transmission,GO:0042391~regulation of membrane potential,GO:0050877~nervous system process,GO:1902476~chloride transmembrane transport,	GO:0016020~membrane,GO:0043005~neuron projection,GO:0045202~synapse,GO:0098794~postsynapse,	GO:0004888~transmembrane signaling receptor activity,GO:0005230~extracellular ligand-gated monoatomic ion channel activity,GO:0005254~chloride channel activity,GO:0030594~neurotransmitter receptor activity,GO:0099095~ligand-gated monoatomic anion channel activity,
LOC105431841	glutathione S-transferase 1-like(LOC105431841)	Pogonomyrmex barbatus	GO:0006749~glutathione metabolic process,		GO:0004364~glutathione transferase activity,	pbar00480:Glutathione metabolism,pbar00980:Metabolism of xenobiotics by cytochrome P450,pbar00982:Drug metabolism - cytochrome P450,pbar00983:Drug metabolism - other enzymes,pbar01100:Metabolic pathways,
LOC105427480	glutathione S-transferase-like(LOC105427480)	Pogonomyrmex barbatus	GO:0006749~glutathione metabolic process,		GO:0004364~glutathione transferase activity,	pbar00480:Glutathione metabolism,pbar00590:Arachidonic acid metabolism,pbar00980:Metabolism of xenobiotics by cytochrome P450,pbar00982:Drug metabolism - cytochrome P450,pbar01100:Metabolic pathways,
LOC105428890	glyceraldehyde-3-phosphate dehydrogenase 2-like(LOC105428890)	Pogonomyrmex barbatus	GO:0006006~glucose metabolic process,GO:0006096~glycolytic process,	GO:0005829~cytosol,	GO:0004365~glyceraldehyde-3-phosphate dehydrogenase (NAD+) (phosphorylating) activity,GO:0016620~oxidoreductase activity, acting on the aldehyde or oxo group of donors, NAD or NADP as acceptor,GO:0050661~NADP binding,GO:0051287~NAD binding,	pbar00010:Glycolysis / Gluconeogenesis,pbar01100:Metabolic pathways,pbar01200:Carbon metabolism,pbar01230:Biosynthesis of amino acids,
LOC105429993	glycerol-3-phosphate dehydrogenase [NAD(+)], cytoplasmic-like(LOC105429993)	Pogonomyrmex barbatus	GO:0005975~carbohydrate metabolic process,GO:0006116~NADH oxidation,GO:0006650~glycerophospholipid metabolic process,GO:0046168~glycerol-3-phosphate catabolic process,	GO:0005829~cytosol,GO:0009331~glycerol-3-phosphate dehydrogenase (FAD) complex,	GO:0042803~protein homodimerization activity,GO:0047952~glycerol-3-phosphate dehydrogenase [NAD(P)+] activity,GO:0051287~NAD binding,GO:0141152~glycerol-3-phosphate dehydrogenase (NAD+) activity,	pbar00564:Glycerophospholipid metabolism,
[truncated: 485 more rows]
