# Supplementary material for: Age, Caste, and Social Context Shape Ovarian Morphology and Transcriptomic Profiles in Red Harvester Ants (Pogonomyrmex barbatus)
Source: Research Square preprint supplement (doi:10.21203/rs.3.rs-6933990/v1), 2025-06-27
Supplement: Supplementary file 4 [file 9b7188db4613ee5dcc37f2aa.xlsx]

## Sheet: ql5wVSqr
Gene	Base mean	log2FC	StdErr	Wald-Stats	pvalue	P-adj	Chromosome	Start	End	Strand	Product
LOC112552780	1035.11	-1.70951	0.295854	-5.7782	7.55022e-09	8.91832e-05	NW_011933699.1	1024671	1032809	+	cytochrome P450 6k1-like
LOC105433950	117.712	-1.3998	0.257589	-5.43425	5.50268e-08	0.000324988	NW_011933339.1	57913	59894	-	cytochrome P450 9e2-like
LOC105429277	531.622	-1.6594	0.312759	-5.30569	1.12249e-07	0.000441964	NW_011933699.1	1018855	1022562	+	cytochrome P450 6k1-like
LOC105425909	46.5478	-1.69357	0.324703	-5.21576	1.83068e-07	0.000481781	NW_011933613.1	209923	214414	-	esterase FE4-like
LOC105428156	248.249	-1.75548	0.337871	-5.19571	2.03937e-07	0.000481781	NW_011933681.1	467051	475837	-	cytochrome P450 CYP12A2-like
LOC105427419	271.036	-2.01963	0.391297	-5.16138	2.45134e-07	0.000482588	NW_011933667.1	337515	341169	-	acyl-CoA Delta(11) desaturase, transcript variant X2
LOC112553041	639.733	-1.0485	0.228674	-4.58512	4.53731e-06	0.00595497	NW_011933312.1	78028	81853	-	fatty acyl-CoA reductase 1-like
LOC105428892	39.6709	-1.94565	0.442432	-4.39762	1.09442e-05	0.0117521	NW_011933695.1	1859386	1866205	-	uncharacterized LOC105428892
LOC105430344	385.882	-5.99265	1.35636	-4.41817	9.95417e-06	0.0117521	NW_011933718.1	476129	486204	+	cytochrome P450 4c21-like
LOC105429210	629.849	-1.58854	0.363658	-4.36822	1.25264e-05	0.0123301	NW_011933699.1	1013681	1017339	+	cytochrome P450 6k1-like, transcript variant X1
LOC105433450	86.678	-1.37797	0.317026	-4.34655	1.38296e-05	0.0125658	NW_011933316.1	27105	30378	+	phospholipase A1
LOC105430158	690.056	-1.52202	0.35513	-4.28581	1.82078e-05	0.0153622	NW_011933717.1	245627	247333	-	uncharacterized LOC105430158, transcript variant X5
LOC105425860	82.3965	-1.45436	0.344174	-4.22566	2.38242e-05	0.0170589	NW_011933611.1	597546	605500	-	fatty-acid amide hydrolase 2, transcript variant X3
LOC105431602	92.8408	1.0565	0.249829	4.22889	2.3485e-05	0.0170589	NW_011933745.1	907939	928295	+	echinoderm microtubule-associated protein-like CG42247, transcript variant X1
LOC105430438	19.8671	-1.91935	0.456884	-4.20097	2.65774e-05	0.0174407	NW_011933718.1	1223194	1223871	-	uncharacterized LOC105430438
LOC105425816	246.905	-1.55077	0.375955	-4.12489	3.70915e-05	0.0208631	NW_011933214.1	62706	64403	-	fatty acyl-CoA reductase wat-like
LOC105430508	275.3	-1.06647	0.257943	-4.1345	3.55725e-05	0.0208631	NW_011933289.1	64819	86913	+	facilitated trehalose transporter Tret1, transcript variant X1
LOC105430810	621.512	-1.20711	0.301533	-4.00324	6.24813e-05	0.0320882	NW_011933723.1	770982	772765	+	probable cytochrome P450 6a13
LOC105429493	52.6612	-2.0088	0.504114	-3.98481	6.75346e-05	0.0332383	NW_011933704.1	900759	904281	+	uncharacterized LOC105429493
LOC105433055	117.019	-1.71388	0.434154	-3.94764	7.89246e-05	0.0353045	NW_011933767.1	1472587	1485194	-	open rectifier potassium channel protein 1, transcript variant X1
LOC105421972	28.2394	-5.39835	1.37559	-3.92437	8.69561e-05	0.0354181	NW_011931055.1	25263	28493	-	uncharacterized LOC105421972, transcript variant X2
LOC105425277	422.533	-1.48367	0.380184	-3.90251	9.51999e-05	0.0374834	NW_011933591.1	643164	645427	-	elongation of very long chain fatty acids protein 1-like, transcript variant X1
LOC105428113	1856.09	-1.28503	0.330945	-3.88291	0.000103213	0.0380354	NW_011933679.1	171340	175541	-	zinc finger CCCH domain-containing protein 13, transcript variant X2
LOC105424198	368.904	-1.25928	0.327221	-3.84842	0.000118884	0.0381956	NW_011933555.1	136351	157940	-	anoctamin-8-like, transcript variant X5
LOC105427531	80.6229	-1.24502	0.323647	-3.84685	0.000119644	0.0381956	NW_011933668.1	108169	120664	-	uncharacterized LOC105427531
LOC105434257	393.199	-1.30522	0.345512	-3.77763	0.000158331	0.0467551	NW_011933351.1	273255	277565	+	cysteine dioxygenase type 1
